# Supplementary material for: Methodological heterogeneity biases physical activity metrics derived from the Actigraph GT3X in multiple sclerosis: A rapid review and comparative study
Source: Front Rehabil Sci. 2022 Nov 28;3:989658. doi: 10.3389/fresc.2022.989658 (PMC9742246; doi:10.3389/fresc.2022.989658)
Supplement: Supplementary file 4 [file SupplementaryTable4.xlsx]

## Sheet: S4 - Pairwise comparisons
Supplementary Table 4 - Pairwise differences, correlations, and agreement between methods
LFE: low frequency extension, VM: vector magnitude, PA: Physical activity, LPA: Light physical activity, MVPA: Moderate to vigorous physical activity, r: Pearson product-moment correlation coefficient, CCC: Lin's concordance correlation coefficient, CI: Confidence interval. Differences were considered significant if p<0.05 following correction for multiple testing. All given p values reflect this…
N	Metric	Method 1	Method 2	Difference Median [Q2-Q3]	Units	p	Correlation r [95% CI]	Agreement CCC [95% CI]	Significant difference?
1	Steps	LFE	Standard	6,052 [5,270-6,833]	Steps	<0.001	0.89 [0.80-0.94]	0.31 [0.20-0.41]	TRUE
2	Activity counts	LFE, Vertical	Standard, Vertical	30,490 [ 26,215- 35,532]	Counts	<0.001	1.00 [1.00-1.00]	0.97 [0.95-0.98]	TRUE
2	Activity counts	LFE, VM	Standard, VM	64,797 [ 56,242- 72,582]	Counts	<0.001	1.00 [1.00-1.00]	0.94 [0.91-0.96]	TRUE
2	Activity counts	LFE, VM	Standard, Vertical	334,775 [ 267,944- 405,636]	Counts	<0.001	0.90 [0.82-0.95]	0.24 [0.15-0.33]	TRUE
2	Activity counts	LFE, Vertical	Standard, VM	-236,761 [-314,682--184,017]	Counts	<0.001	0.91 [0.85-0.95]	0.37 [0.26-0.48]	TRUE
2	Activity counts	Standard, Vertical	Standard, VM	-267,592 [-343,153--209,093]	Counts	<0.001	0.91 [0.84-0.95]	0.32 [0.21-0.42]	TRUE
2	Activity counts	LFE, Vertical	LFE, VM	-303,943 [-370,630--238,787]	Counts	<0.001	0.91 [0.84-0.95]	0.28 [0.18-0.38]	TRUE
3	Time in PA	LFE, VM, 150cpm	Standard, VM, 100cpm	0.00 [-0.04- 0.10]	Hours	0.997	1.00 [ 0.99-1.00]	1.00 [ 0.99-1.00]	FALSE
3	Time in PA	LFE, Vertical, 150cpm	Standard, Vertical, 100cpm	0.00 [-0.06- 0.08]	Hours	0.996	1.00 [ 0.99-1.00]	1.00 [ 0.99-1.00]	FALSE
3	Time in PA	LFE, Vertical, 200cpm	Standard, Vertical, 150cpm	0.09 [ 0.00- 0.17]	Hours	<0.001	0.99 [ 0.99-1.00]	0.99 [ 0.98-0.99]	TRUE
3	Time in PA	LFE, VM, 200cpm	Standard, VM, 150cpm	0.10 [ 0.05- 0.19]	Hours	<0.001	1.00 [ 0.99-1.00]	0.99 [ 0.99-1.00]	TRUE
3	Time in PA	Standard, VM, 150cpm	Standard, VM, 200cpm	0.39 [ 0.30- 0.51]	Hours	<0.001	1.00 [ 0.99-1.00]	0.94 [ 0.91-0.96]	TRUE
3	Time in PA	Standard, Vertical, 150cpm	Standard, Vertical, 200cpm	0.42 [ 0.33- 0.47]	Hours	<0.001	1.00 [ 0.99-1.00]	0.93 [ 0.89-0.96]	TRUE
3	Time in PA	LFE, Vertical, 150cpm	LFE, Vertical, 200cpm	0.47 [ 0.36- 0.53]	Hours	<0.001	0.99 [ 0.99-1.00]	0.92 [ 0.87-0.95]	TRUE
3	Time in PA	LFE, VM, 150cpm	LFE, VM, 200cpm	0.48 [ 0.36- 0.57]	Hours	<0.001	0.99 [ 0.99-1.00]	0.93 [ 0.90-0.96]	TRUE
3	Time in PA	LFE, VM, 200cpm	Standard, VM, 200cpm	0.49 [ 0.37- 0.65]	Hours	<0.001	0.99 [ 0.98-0.99]	0.91 [ 0.85-0.94]	TRUE
3	Time in PA	LFE, Vertical, 200cpm	Standard, Vertical, 200cpm	0.51 [ 0.35- 0.63]	Hours	<0.001	0.98 [ 0.97-0.99]	0.89 [ 0.82-0.93]	TRUE
3	Time in PA	LFE, Vertical, 150cpm	Standard, Vertical, 150cpm	0.55 [ 0.41- 0.67]	Hours	<0.001	0.98 [ 0.97-0.99]	0.88 [ 0.81-0.92]	TRUE
3	Time in PA	Standard, Vertical, 100cpm	Standard, Vertical, 150cpm	0.56 [ 0.42- 0.63]	Hours	<0.001	0.99 [ 0.99-1.00]	0.89 [ 0.84-0.93]	TRUE
3	Time in PA	LFE, VM, 150cpm	Standard, VM, 150cpm	0.56 [ 0.45- 0.73]	Hours	<0.001	0.99 [ 0.97-0.99]	0.89 [ 0.84-0.93]	TRUE
3	Time in PA	Standard, VM, 100cpm	Standard, VM, 150cpm	0.58 [ 0.42- 0.65]	Hours	<0.001	0.99 [ 0.99-1.00]	0.91 [ 0.86-0.94]	TRUE
3	Time in PA	LFE, Vertical, 100cpm	LFE, Vertical, 150cpm	0.58 [ 0.46- 0.67]	Hours	<0.001	0.99 [ 0.99-1.00]	0.88 [ 0.82-0.92]	TRUE
3	Time in PA	LFE, Vertical, 100cpm	Standard, Vertical, 100cpm	0.59 [ 0.42- 0.71]	Hours	<0.001	0.98 [ 0.97-0.99]	0.87 [ 0.80-0.92]	TRUE
3	Time in PA	LFE, VM, 100cpm	LFE, VM, 150cpm	0.62 [ 0.51- 0.73]	Hours	<0.001	0.99 [ 0.99-1.00]	0.90 [ 0.85-0.93]	TRUE
3	Time in PA	LFE, VM, 100cpm	Standard, VM, 100cpm	0.63 [ 0.49- 0.84]	Hours	<0.001	0.99 [ 0.97-0.99]	0.88 [ 0.82-0.92]	TRUE
3	Time in PA	Standard, Vertical, 100cpm	Standard, Vertical, 200cpm	0.97 [ 0.75- 1.09]	Hours	<0.001	0.98 [ 0.96-0.99]	0.72 [ 0.61-0.80]	TRUE
3	Time in PA	Standard, VM, 100cpm	Standard, VM, 200cpm	0.97 [ 0.75- 1.16]	Hours	<0.001	0.98 [ 0.96-0.99]	0.76 [ 0.66-0.83]	TRUE
3	Time in PA	LFE, VM, 150cpm	Standard, VM, 200cpm	0.98 [ 0.74- 1.18]	Hours	<0.001	0.97 [ 0.94-0.98]	0.74 [ 0.63-0.82]	TRUE
3	Time in PA	LFE, Vertical, 150cpm	Standard, Vertical, 200cpm	0.99 [ 0.74- 1.14]	Hours	<0.001	0.97 [ 0.94-0.98]	0.70 [ 0.58-0.78]	TRUE
3	Time in PA	LFE, Vertical, 100cpm	LFE, Vertical, 200cpm	1.03 [ 0.81- 1.22]	Hours	<0.001	0.98 [ 0.96-0.99]	0.68 [ 0.57-0.77]	TRUE
3	Time in PA	LFE, VM, 100cpm	LFE, VM, 200cpm	1.12 [ 0.86- 1.28]	Hours	<0.001	0.98 [ 0.96-0.99]	0.73 [ 0.62-0.81]	TRUE
3	Time in PA	LFE, Vertical, 100cpm	Standard, Vertical, 150cpm	1.16 [ 0.87- 1.33]	Hours	<0.001	0.96 [ 0.92-0.98]	0.64 [ 0.52-0.74]	TRUE
3	Time in PA	LFE, VM, 100cpm	Standard, VM, 150cpm	1.19 [ 0.97- 1.48]	Hours	<0.001	0.96 [ 0.93-0.98]	0.68 [ 0.56-0.77]	TRUE
3	Time in PA	LFE, Vertical, 100cpm	Standard, Vertical, 200cpm	1.59 [ 1.19- 1.83]	Hours	<0.001	0.93 [ 0.88-0.96]	0.48 [ 0.35-0.59]	TRUE
3	Time in PA	LFE, VM, 100cpm	Standard, VM, 200cpm	1.60 [ 1.25- 2.01]	Hours	<0.001	0.94 [ 0.89-0.97]	0.53 [ 0.40-0.64]	TRUE
3	Time in PA	LFE, VM, 200cpm	Standard, Vertical, 100cpm	2.07 [ 1.33- 2.43]	Hours	<0.001	0.80 [ 0.65-0.89]	0.34 [ 0.21-0.46]	TRUE
3	Time in PA	LFE, VM, 150cpm	Standard, Vertical, 100cpm	2.54 [ 1.86- 2.90]	Hours	<0.001	0.76 [ 0.60-0.87]	0.26 [ 0.15-0.36]	TRUE
3	Time in PA	LFE, VM, 200cpm	Standard, Vertical, 150cpm	2.62 [ 1.94- 2.89]	Hours	<0.001	0.75 [ 0.58-0.86]	0.23 [ 0.13-0.33]	TRUE
3	Time in PA	LFE, VM, 200cpm	Standard, Vertical, 200cpm	3.02 [ 2.34- 3.38]	Hours	<0.001	0.71 [ 0.51-0.83]	0.17 [ 0.09-0.25]	TRUE
3	Time in PA	LFE, VM, 150cpm	Standard, Vertical, 150cpm	3.11 [ 2.34- 3.41]	Hours	<0.001	0.71 [ 0.52-0.83]	0.18 [ 0.09-0.26]	TRUE
3	Time in PA	LFE, VM, 100cpm	Standard, Vertical, 100cpm	3.16 [ 2.43- 3.60]	Hours	<0.001	0.72 [ 0.53-0.84]	0.19 [ 0.10-0.27]	TRUE
3	Time in PA	LFE, VM, 150cpm	Standard, Vertical, 200cpm	3.47 [ 2.69- 3.90]	Hours	<0.001	0.67 [ 0.45-0.81]	0.13 [ 0.07-0.20]	TRUE
3	Time in PA	LFE, VM, 100cpm	Standard, Vertical, 150cpm	3.70 [ 2.90- 4.04]	Hours	<0.001	0.66 [ 0.45-0.80]	0.13 [ 0.06-0.20]	TRUE
3	Time in PA	LFE, VM, 100cpm	Standard, Vertical, 200cpm	4.14 [ 3.28- 4.56]	Hours	<0.001	0.61 [ 0.38-0.77]	0.10 [ 0.04-0.15]	TRUE
3	Time in PA	LFE, Vertical, 200cpm	Standard, Vertical, 100cpm	-0.42 [-0.50--0.35]	Hours	<0.001	1.00 [ 0.99-1.00]	0.92 [ 0.88-0.95]	TRUE
3	Time in PA	LFE, VM, 200cpm	Standard, VM, 100cpm	-0.43 [-0.52--0.37]	Hours	<0.001	0.99 [ 0.99-1.00]	0.94 [ 0.91-0.96]	TRUE
3	Time in PA	LFE, Vertical, 100cpm	Standard, VM, 200cpm	-0.88 [-1.24--0.49]	Hours	<0.001	0.89 [ 0.81-0.94]	0.71 [ 0.57-0.80]	TRUE
3	Time in PA	LFE, Vertical, 100cpm	Standard, VM, 150cpm	-1.29 [-1.61--0.79]	Hours	<0.001	0.88 [ 0.78-0.93]	0.56 [ 0.42-0.68]	TRUE
3	Time in PA	LFE, Vertical, 100cpm	LFE, VM, 200cpm	-1.38 [-1.74--0.84]	Hours	<0.001	0.86 [ 0.75-0.92]	0.52 [ 0.37-0.64]	TRUE
3	Time in PA	LFE, Vertical, 150cpm	Standard, VM, 200cpm	-1.41 [-1.75--0.95]	Hours	<0.001	0.87 [ 0.77-0.93]	0.49 [ 0.35-0.61]	TRUE
3	Time in PA	Standard, Vertical, 100cpm	Standard, VM, 200cpm	-1.51 [-1.82--0.95]	Hours	<0.001	0.85 [ 0.74-0.92]	0.48 [ 0.34-0.61]	TRUE
3	Time in PA	LFE, Vertical, 100cpm	Standard, VM, 100cpm	-1.89 [-2.16--1.24]	Hours	<0.001	0.85 [ 0.73-0.92]	0.41 [ 0.27-0.53]	TRUE
3	Time in PA	LFE, Vertical, 150cpm	Standard, VM, 150cpm	-1.91 [-2.24--1.24]	Hours	<0.001	0.85 [ 0.73-0.91]	0.38 [ 0.25-0.50]	TRUE
3	Time in PA	LFE, Vertical, 100cpm	LFE, VM, 150cpm	-1.93 [-2.28--1.22]	Hours	<0.001	0.83 [ 0.70-0.91]	0.39 [ 0.26-0.51]	TRUE
3	Time in PA	LFE, Vertical, 200cpm	Standard, VM, 200cpm	-1.94 [-2.33--1.31]	Hours	<0.001	0.84 [ 0.72-0.91]	0.35 [ 0.23-0.46]	TRUE
3	Time in PA	Standard, Vertical, 100cpm	Standard, VM, 150cpm	-1.96 [-2.20--1.26]	Hours	<0.001	0.82 [ 0.69-0.90]	0.38 [ 0.24-0.49]	TRUE
3	Time in PA	Standard, Vertical, 150cpm	Standard, VM, 200cpm	-2.02 [-2.46--1.42]	Hours	<0.001	0.81 [ 0.67-0.89]	0.33 [ 0.20-0.44]	TRUE
3	Time in PA	LFE, Vertical, 150cpm	LFE, VM, 200cpm	-2.05 [-2.32--1.31]	Hours	<0.001	0.82 [ 0.69-0.90]	0.35 [ 0.22-0.46]	TRUE
3	Time in PA	LFE, Vertical, 200cpm	Standard, VM, 150cpm	-2.37 [-2.77--1.62]	Hours	<0.001	0.81 [ 0.67-0.89]	0.27 [ 0.17-0.37]	TRUE
3	Time in PA	LFE, Vertical, 150cpm	Standard, VM, 100cpm	-2.45 [-2.85--1.74]	Hours	<0.001	0.81 [ 0.67-0.89]	0.27 [ 0.16-0.37]	TRUE
3	Time in PA	Standard, Vertical, 200cpm	Standard, VM, 200cpm	-2.46 [-2.89--1.81]	Hours	<0.001	0.77 [ 0.61-0.87]	0.24 [ 0.14-0.34]	TRUE
3	Time in PA	LFE, Vertical, 150cpm	LFE, VM, 150cpm	-2.49 [-2.87--1.82]	Hours	<0.001	0.79 [ 0.64-0.88]	0.26 [ 0.16-0.36]	TRUE
3	Time in PA	Standard, Vertical, 150cpm	Standard, VM, 150cpm	-2.50 [-2.85--1.73]	Hours	<0.001	0.78 [ 0.62-0.87]	0.26 [ 0.15-0.36]	TRUE
3	Time in PA	LFE, Vertical, 200cpm	LFE, VM, 200cpm	-2.51 [-2.81--1.82]	Hours	<0.001	0.78 [ 0.63-0.88]	0.25 [ 0.15-0.35]	TRUE
3	Time in PA	Standard, Vertical, 100cpm	Standard, VM, 100cpm	-2.51 [-2.90--1.75]	Hours	<0.001	0.78 [ 0.63-0.88]	0.27 [ 0.16-0.37]	TRUE
3	Time in PA	LFE, Vertical, 100cpm	LFE, VM, 100cpm	-2.55 [-2.93--1.91]	Hours	<0.001	0.80 [ 0.65-0.89]	0.28 [ 0.17-0.38]	TRUE
3	Time in PA	LFE, Vertical, 200cpm	Standard, VM, 100cpm	-2.89 [-3.44--2.19]	Hours	<0.001	0.77 [ 0.60-0.87]	0.20 [ 0.11-0.28]	TRUE
3	Time in PA	Standard, Vertical, 200cpm	Standard, VM, 150cpm	-2.97 [-3.33--2.16]	Hours	<0.001	0.74 [ 0.56-0.85]	0.19 [ 0.10-0.27]	TRUE
3	Time in PA	LFE, Vertical, 200cpm	LFE, VM, 150cpm	-2.97 [-3.41--2.27]	Hours	<0.001	0.75 [ 0.57-0.86]	0.19 [ 0.11-0.28]	TRUE
3	Time in PA	Standard, Vertical, 150cpm	Standard, VM, 100cpm	-3.05 [-3.48--2.34]	Hours	<0.001	0.73 [ 0.55-0.85]	0.19 [ 0.10-0.27]	TRUE
3	Time in PA	LFE, Vertical, 150cpm	LFE, VM, 100cpm	-3.15 [-3.52--2.42]	Hours	<0.001	0.75 [ 0.58-0.86]	0.19 [ 0.10-0.27]	TRUE
3	Time in PA	Standard, Vertical, 200cpm	Standard, VM, 100cpm	-3.45 [-3.94--2.73]	Hours	<0.001	0.69 [ 0.49-0.82]	0.14 [ 0.07-0.21]	TRUE
3	Time in PA	LFE, Vertical, 200cpm	LFE, VM, 100cpm	-3.57 [-4.08--2.81]	Hours	<0.001	0.70 [ 0.50-0.83]	0.14 [ 0.07-0.21]	TRUE
4	Time in MVPA	Sandroff-1722	Sandroff-1584	0.00 [-0.01- 0.01]	Hours	1.000	1.00 [ 1.00-1.00]	1.00 [ 1.00-1.00]	FALSE
4	Time in MVPA	Freedson	Sandroff-Severity	0.01 [-0.10- 0.01]	Hours	0.902	0.90 [ 0.82-0.95]	0.88 [ 0.80-0.94]	FALSE
4	Time in MVPA	Sandroff-1745	Sandroff-Severity	0.08 [-0.09- 0.15]	Hours	0.894	0.89 [ 0.81-0.94]	0.88 [ 0.80-0.93]	FALSE
4	Time in MVPA	Sandroff-1722	Sandroff-Severity	0.09 [-0.09- 0.16]	Hours	0.893	0.89 [ 0.81-0.94]	0.88 [ 0.80-0.93]	FALSE
4	Time in MVPA	Agiovlasitis (LFE)	Freedson	-0.03 [-0.18- 0.09]	Hours	0.729	0.73 [ 0.55-0.85]	0.65 [ 0.48-0.77]	FALSE
4	Time in MVPA	Sandroff-Severity	Sandroff-1584	-0.10 [-0.16- 0.09]	Hours	0.894	0.89 [ 0.81-0.94]	0.88 [ 0.79-0.93]	FALSE
4	Time in MVPA	Sandroff-1722	Sandroff-1745	0.01 [ 0.00- 0.02]	Hours	<0.001	1.00 [ 1.00-1.00]	1.00 [ 1.00-1.00]	TRUE
4	Time in MVPA	Sandroff-1745	Freedson	0.08 [ 0.05- 0.13]	Hours	<0.001	0.99 [ 0.99-1.00]	0.97 [ 0.95-0.98]	TRUE
4	Time in MVPA	Agiovlasitis (LFE)	Agiovlasitis (Standard)	0.09 [ 0.04- 0.20]	Hours	<0.001	0.88 [ 0.79-0.93]	0.73 [ 0.60-0.82]	TRUE
4	Time in MVPA	Sandroff-1722	Freedson	0.10 [ 0.05- 0.15]	Hours	<0.001	0.99 [ 0.99-1.00]	0.96 [ 0.94-0.98]	TRUE
4	Time in MVPA	Freedson	Agiovlasitis (Standard)	0.12 [ 0.03- 0.25]	Hours	<0.001	0.79 [ 0.64-0.88]	0.52 [ 0.37-0.64]	TRUE
4	Time in MVPA	Sandroff-1745	Agiovlasitis (Standard)	0.20 [ 0.08- 0.36]	Hours	<0.001	0.78 [ 0.62-0.88]	0.43 [ 0.29-0.55]	TRUE
4	Time in MVPA	Sandroff-1722	Agiovlasitis (Standard)	0.22 [ 0.09- 0.37]	Hours	<0.001	0.78 [ 0.62-0.88]	0.42 [ 0.28-0.54]	TRUE
4	Time in MVPA	Sandroff-Severity	Agiovlasitis (Standard)	0.22 [ 0.11- 0.42]	Hours	<0.001	0.68 [ 0.48-0.82]	0.39 [ 0.23-0.53]	TRUE
4	Time in MVPA	Sandroff-1745	Sandroff-1584	-0.01 [-0.02- 0.00]	Hours	<0.001	1.00 [ 1.00-1.00]	1.00 [ 1.00-1.00]	TRUE
4	Time in MVPA	Agiovlasitis (LFE)	Sandroff-1745	-0.07 [-0.31- 0.02]	Hours	0.732	0.73 [ 0.55-0.85]	0.58 [ 0.41-0.71]	TRUE
4	Time in MVPA	Agiovlasitis (LFE)	1584	-0.08 [-0.33- 0.01]	Hours	0.726	0.73 [ 0.54-0.84]	0.57 [ 0.40-0.70]	TRUE
4	Time in MVPA	Agiovlasitis (LFE)	Sandroff-1722	-0.08 [-0.33- 0.02]	Hours	0.733	0.73 [ 0.55-0.85]	0.57 [ 0.40-0.71]	TRUE
4	Time in MVPA	Freedson	Sandroff-1584	-0.10 [-0.15--0.05]	Hours	<0.001	0.99 [ 0.99-1.00]	0.96 [ 0.94-0.98]	TRUE
4	Time in MVPA	Agiovlasitis (LFE)	Sandroff-Severity	-0.10 [-0.21--0.01]	Hours	0.698	0.70 [ 0.50-0.83]	0.59 [ 0.40-0.73]	TRUE
4	Time in MVPA	Sandroff-1584	Sasaki	-0.11 [-0.36- 0.01]	Hours	<0.001	0.91 [ 0.83-0.95]	0.85 [ 0.76-0.91]	TRUE
4	Time in MVPA	Sandroff-1722	Sasaki	-0.12 [-0.35- 0.01]	Hours	<0.001	0.91 [ 0.83-0.95]	0.85 [ 0.75-0.91]	TRUE
4	Time in MVPA	Sandroff-1745	Sasaki	-0.12 [-0.37- 0.00]	Hours	<0.001	0.91 [ 0.83-0.95]	0.84 [ 0.74-0.91]	TRUE
4	Time in MVPA	Sandroff-Severity	Sasaki	-0.17 [-0.38--0.02]	Hours	<0.001	0.81 [ 0.67-0.89]	0.72 [ 0.57-0.83]	TRUE
4	Time in MVPA	Agiovlasitis (Standard)	Sandroff-1584	-0.22 [-0.37--0.09]	Hours	<0.001	0.78 [ 0.62-0.88]	0.42 [ 0.28-0.54]	TRUE
4	Time in MVPA	Agiovlasitis (LFE)	Sasaki	-0.23 [-0.51--0.11]	Hours	<0.001	0.60 [ 0.36-0.76]	0.36 [ 0.19-0.52]	TRUE
4	Time in MVPA	Freedson	Sasaki	-0.24 [-0.46--0.06]	Hours	<0.001	0.89 [ 0.81-0.94]	0.75 [ 0.63-0.84]	TRUE
4	Time in MVPA	Agiovlasitis (Standard)	Sasaki	-0.39 [-0.68--0.18]	Hours	<0.001	0.59 [ 0.35-0.76]	0.23 [ 0.11-0.35]	TRUE
5	Time in LPA	LFE, Vertical, 100cpm, Sandroff-1722	LFE, Vertical, 100cpm, Sandroff-1745	-0.01 [-0.02- 0.00]	Hours	<0.001	1.00 [ 1.00-1.00]	1.00 [ 1.00-1.00]	TRUE
5	Time in LPA	LFE, Vertical, 150cpm, Sandroff-1722	LFE, Vertical, 150cpm, Sandroff-1745	-0.01 [-0.02- 0.00]	Hours	<0.001	1.00 [ 1.00-1.00]	1.00 [ 1.00-1.00]	TRUE
5	Time in LPA	LFE, Vertical, 200cpm, Sandroff-1722	LFE, Vertical, 200cpm, Sandroff-1745	-0.01 [-0.02- 0.00]	Hours	<0.001	1.00 [ 1.00-1.00]	1.00 [ 1.00-1.00]	TRUE
5	Time in LPA	LFE, Vertical, 150cpm, Sandroff-1745	Standard, Vertical, 100cpm, Sandroff-1584	0.00 [-0.05- 0.09]	Hours	0.994	0.99 [ 0.99-1.00]	0.99 [ 0.99-1.00]	FALSE
5	Time in LPA	LFE, Vertical, 150cpm, Sandroff-1722	Standard, Vertical, 100cpm, Sandroff-1584	-0.01 [-0.06- 0.08]	Hours	0.993	0.99 [ 0.99-1.00]	0.99 [ 0.99-1.00]	FALSE
5	Time in LPA	LFE, Vertical, 100cpm, Sandroff-1745	LFE, Vertical, 100cpm, Freedson	-0.08 [-0.13--0.05]	Hours	<0.001	1.00 [ 1.00-1.00]	0.99 [ 0.99-1.00]	TRUE
5	Time in LPA	LFE, Vertical, 150cpm, Sandroff-1745	LFE, Vertical, 150cpm, Freedson	-0.08 [-0.13--0.05]	Hours	<0.001	1.00 [ 1.00-1.00]	0.99 [ 0.99-1.00]	TRUE
5	Time in LPA	LFE, Vertical, 100cpm, Sandroff-1722	LFE, Vertical, 100cpm, Freedson	-0.10 [-0.15--0.05]	Hours	<0.001	1.00 [ 1.00-1.00]	0.99 [ 0.99-1.00]	TRUE
5	Time in LPA	LFE, Vertical, 150cpm, Freedson	Standard, Vertical, 100cpm, Sandroff-1584	0.10 [ 0.05- 0.17]	Hours	<0.001	1.00 [ 0.99-1.00]	0.99 [ 0.98-0.99]	TRUE
5	Time in LPA	LFE, Vertical, 150cpm, Sandroff-1722	LFE, Vertical, 150cpm, Freedson	-0.10 [-0.15--0.05]	Hours	<0.001	1.00 [ 0.99-1.00]	0.99 [ 0.98-0.99]	TRUE
5	Time in LPA	LFE, Vertical, 200cpm, Sandroff-1722	LFE, Vertical, 200cpm, Freedson	-0.10 [-0.15--0.05]	Hours	<0.001	1.00 [ 0.99-1.00]	0.99 [ 0.98-0.99]	TRUE
5	Time in LPA	LFE, Vertical, 200cpm, Sandroff-1745	LFE, Vertical, 200cpm, Freedson	-0.08 [-0.13--0.05]	Hours	<0.001	1.00 [ 1.00-1.00]	0.99 [ 0.98-0.99]	TRUE
5	Time in LPA	LFE, Vertical, 200cpm, Sandroff-1722	Standard, Vertical, 150cpm, Sandroff-1584	0.09 [ 0.01- 0.18]	Hours	<0.001	0.99 [ 0.98-0.99]	0.98 [ 0.97-0.99]	TRUE
5	Time in LPA	LFE, Vertical, 200cpm, Sandroff-1745	Standard, Vertical, 150cpm, Sandroff-1584	0.11 [ 0.01- 0.18]	Hours	<0.001	0.99 [ 0.98-0.99]	0.98 [ 0.97-0.99]	TRUE
5	Time in LPA	LFE, Vertical, 150cpm, Sandroff-Severity	Standard, Vertical, 100cpm, Sandroff-1584	0.07 [-0.01- 0.17]	Hours	0.977	0.98 [ 0.96-0.99]	0.98 [ 0.96-0.99]	TRUE
5	Time in LPA	LFE, Vertical, 100cpm, Freedson	LFE, Vertical, 100cpm, Sandroff-Severity	-0.01 [-0.01- 0.10]	Hours	0.981	0.98 [ 0.97-0.99]	0.98 [ 0.96-0.99]	FALSE
5	Time in LPA	LFE, Vertical, 100cpm, Sandroff-1745	LFE, Vertical, 100cpm, Sandroff-Severity	-0.08 [-0.15- 0.09]	Hours	0.974	0.97 [ 0.95-0.99]	0.97 [ 0.95-0.99]	FALSE
5	Time in LPA	LFE, Vertical, 100cpm, Sandroff-1722	LFE, Vertical, 100cpm, Sandroff-Severity	-0.09 [-0.16- 0.09]	Hours	0.974	0.97 [ 0.95-0.99]	0.97 [ 0.95-0.99]	FALSE
5	Time in LPA	LFE, Vertical, 150cpm, Freedson	LFE, Vertical, 150cpm, Sandroff-Severity	-0.01 [-0.01- 0.10]	Hours	0.978	0.98 [ 0.96-0.99]	0.97 [ 0.95-0.99]	FALSE
5	Time in LPA	LFE, Vertical, 200cpm, Freedson	LFE, Vertical, 200cpm, Sandroff-Severity	-0.01 [-0.01- 0.10]	Hours	0.975	0.98 [ 0.95-0.99]	0.97 [ 0.95-0.98]	FALSE
5	Time in LPA	LFE, Vertical, 150cpm, Sandroff-1745	LFE, Vertical, 150cpm, Sandroff-Severity	-0.08 [-0.15- 0.09]	Hours	0.970	0.97 [ 0.94-0.98]	0.97 [ 0.94-0.98]	FALSE
5	Time in LPA	LFE, Vertical, 200cpm, Sandroff-1745	LFE, Vertical, 200cpm, Sandroff-Severity	-0.08 [-0.15- 0.09]	Hours	0.966	0.97 [ 0.94-0.98]	0.97 [ 0.94-0.98]	FALSE
5	Time in LPA	LFE, Vertical, 150cpm, Sandroff-1722	LFE, Vertical, 150cpm, Sandroff-Severity	-0.09 [-0.16- 0.09]	Hours	0.969	0.97 [ 0.94-0.98]	0.97 [ 0.94-0.98]	FALSE
5	Time in LPA	LFE, Vertical, 200cpm, Sandroff-1722	LFE, Vertical, 200cpm, Sandroff-Severity	-0.09 [-0.16- 0.09]	Hours	0.965	0.97 [ 0.94-0.98]	0.96 [ 0.94-0.98]	FALSE
5	Time in LPA	LFE, Vertical, 200cpm, Freedson	Standard, Vertical, 150cpm, Sandroff-1584	0.20 [ 0.14- 0.28]	Hours	<0.001	0.99 [ 0.99-1.00]	0.96 [ 0.94-0.98]	TRUE
5	Time in LPA	LFE, Vertical, 200cpm, Sandroff-Severity	Standard, Vertical, 150cpm, Sandroff-1584	0.17 [ 0.08- 0.22]	Hours	<0.001	0.97 [ 0.95-0.99]	0.96 [ 0.93-0.98]	TRUE
5	Time in LPA	Standard, VM, 150cpm, Sasaki	Standard, VM, 200cpm, Sasaki	0.39 [ 0.30- 0.51]	Hours	<0.001	1.00 [ 0.99-1.00]	0.93 [ 0.89-0.95]	TRUE
5	Time in LPA	LFE, Vertical, 200cpm, Freedson	Standard, Vertical, 100cpm, Sandroff-1584	-0.32 [-0.41--0.25]	Hours	<0.001	0.99 [ 0.98-0.99]	0.92 [ 0.88-0.95]	TRUE
5	Time in LPA	LFE, Vertical, 150cpm, Sandroff-1722	LFE, Vertical, 200cpm, Freedson	0.36 [ 0.24- 0.47]	Hours	<0.001	0.98 [ 0.97-0.99]	0.91 [ 0.86-0.94]	TRUE
5	Time in LPA	LFE, Vertical, 150cpm, Sandroff-1745	LFE, Vertical, 200cpm, Freedson	0.37 [ 0.25- 0.48]	Hours	<0.001	0.99 [ 0.97-0.99]	0.91 [ 0.86-0.94]	TRUE
5	Time in LPA	LFE, Vertical, 150cpm, Sandroff-Severity	LFE, Vertical, 200cpm, Freedson	0.39 [ 0.31- 0.49]	Hours	<0.001	0.98 [ 0.96-0.99]	0.90 [ 0.84-0.94]	TRUE
5	Time in LPA	Standard, VM, 100cpm, Sasaki	Standard, VM, 150cpm, Sasaki	0.58 [ 0.42- 0.65]	Hours	<0.001	0.99 [ 0.99-1.00]	0.89 [ 0.83-0.93]	TRUE
5	Time in LPA	Standard, Vertical, 150cpm, Sandroff-1584	Standard, Vertical, 200cpm, Sandroff-1584	0.42 [ 0.33- 0.47]	Hours	<0.001	0.99 [ 0.99-1.00]	0.88 [ 0.82-0.92]	TRUE
5	Time in LPA	LFE, Vertical, 150cpm, Freedson	LFE, Vertical, 200cpm, Freedson	0.47 [ 0.36- 0.53]	Hours	<0.001	0.99 [ 0.99-1.00]	0.88 [ 0.82-0.92]	TRUE
5	Time in LPA	LFE, Vertical, 200cpm, Sandroff-1745	Standard, Vertical, 100cpm, Sandroff-1584	-0.40 [-0.48--0.34]	Hours	<0.001	0.99 [ 0.99-1.00]	0.88 [ 0.82-0.92]	TRUE
5	Time in LPA	LFE, Vertical, 200cpm, Sandroff-1722	Standard, Vertical, 100cpm, Sandroff-1584	-0.41 [-0.49--0.36]	Hours	<0.001	0.99 [ 0.99-1.00]	0.88 [ 0.82-0.92]	TRUE
5	Time in LPA	LFE, Vertical, 150cpm, Sandroff-1722	LFE, Vertical, 200cpm, Sandroff-1745	0.46 [ 0.35- 0.52]	Hours	<0.001	0.99 [ 0.99-1.00]	0.87 [ 0.81-0.92]	TRUE
5	Time in LPA	LFE, Vertical, 150cpm, Sandroff-Severity	LFE, Vertical, 200cpm, Sandroff-Severity	0.47 [ 0.36- 0.53]	Hours	<0.001	0.99 [ 0.99-1.00]	0.87 [ 0.81-0.92]	TRUE
5	Time in LPA	LFE, Vertical, 150cpm, Sandroff-1722	LFE, Vertical, 200cpm, Sandroff-1722	0.47 [ 0.36- 0.53]	Hours	<0.001	0.99 [ 0.99-1.00]	0.87 [ 0.81-0.91]	TRUE
5	Time in LPA	LFE, Vertical, 150cpm, Sandroff-1745	LFE, Vertical, 200cpm, Sandroff-1745	0.47 [ 0.36- 0.53]	Hours	<0.001	0.99 [ 0.99-1.00]	0.87 [ 0.81-0.91]	TRUE
5	Time in LPA	LFE, Vertical, 100cpm, Sandroff-1722	LFE, Vertical, 150cpm, Freedson	0.48 [ 0.34- 0.60]	Hours	<0.001	0.98 [ 0.97-0.99]	0.87 [ 0.80-0.91]	TRUE
5	Time in LPA	LFE, Vertical, 100cpm, Sandroff-1745	LFE, Vertical, 150cpm, Freedson	0.48 [ 0.35- 0.61]	Hours	<0.001	0.98 [ 0.97-0.99]	0.86 [ 0.80-0.91]	TRUE
5	Time in LPA	LFE, Vertical, 150cpm, Sandroff-1745	LFE, Vertical, 200cpm, Sandroff-1722	0.48 [ 0.36- 0.54]	Hours	<0.001	0.99 [ 0.99-1.00]	0.86 [ 0.80-0.91]	TRUE
5	Time in LPA	LFE, Vertical, 200cpm, Sandroff-Severity	Standard, Vertical, 100cpm, Sandroff-1584	-0.38 [-0.52--0.26]	Hours	<0.001	0.96 [ 0.93-0.98]	0.86 [ 0.78-0.91]	TRUE
5	Time in LPA	LFE, Vertical, 100cpm, Sandroff-Severity	LFE, Vertical, 150cpm, Freedson	0.49 [ 0.40- 0.62]	Hours	<0.001	0.98 [ 0.96-0.99]	0.85 [ 0.78-0.91]	TRUE
5	Time in LPA	LFE, Vertical, 150cpm, Sandroff-Severity	LFE, Vertical, 200cpm, Sandroff-1745	0.50 [ 0.36- 0.60]	Hours	<0.001	0.97 [ 0.95-0.99]	0.85 [ 0.77-0.90]	TRUE
5	Time in LPA	LFE, Vertical, 150cpm, Sandroff-Severity	LFE, Vertical, 200cpm, Sandroff-1722	0.50 [ 0.36- 0.61]	Hours	<0.001	0.97 [ 0.95-0.99]	0.84 [ 0.76-0.90]	TRUE
5	Time in LPA	LFE, Vertical, 150cpm, Sandroff-1722	LFE, Vertical, 200cpm, Sandroff-Severity	0.38 [ 0.24- 0.56]	Hours	<0.001	0.95 [ 0.90-0.97]	0.84 [ 0.75-0.90]	TRUE
5	Time in LPA	LFE, Vertical, 150cpm, Sandroff-1745	LFE, Vertical, 200cpm, Sandroff-Severity	0.40 [ 0.25- 0.56]	Hours	<0.001	0.95 [ 0.91-0.97]	0.84 [ 0.75-0.90]	TRUE
5	Time in LPA	LFE, Vertical, 100cpm, Freedson	LFE, Vertical, 150cpm, Freedson	0.58 [ 0.46- 0.67]	Hours	<0.001	0.99 [ 0.98-0.99]	0.83 [ 0.75-0.89]	TRUE
5	Time in LPA	Standard, Vertical, 100cpm, Sandroff-1584	Standard, Vertical, 150cpm, Sandroff-1584	0.56 [ 0.42- 0.63]	Hours	<0.001	0.99 [ 0.98-0.99]	0.83 [ 0.75-0.88]	TRUE
5	Time in LPA	LFE, Vertical, 100cpm, Sandroff-1722	LFE, Vertical, 150cpm, Sandroff-1745	0.57 [ 0.45- 0.66]	Hours	<0.001	0.99 [ 0.98-0.99]	0.83 [ 0.75-0.88]	TRUE
5	Time in LPA	LFE, Vertical, 100cpm, Sandroff-Severity	LFE, Vertical, 150cpm, Sandroff-Severity	0.58 [ 0.46- 0.67]	Hours	<0.001	0.99 [ 0.98-0.99]	0.83 [ 0.75-0.88]	TRUE
5	Time in LPA	LFE, Vertical, 150cpm, Freedson	LFE, Vertical, 200cpm, Sandroff-1745	0.52 [ 0.48- 0.64]	Hours	<0.001	1.00 [ 0.99-1.00]	0.83 [ 0.75-0.88]	TRUE
5	Time in LPA	LFE, Vertical, 100cpm, Sandroff-1722	LFE, Vertical, 150cpm, Sandroff-1722	0.58 [ 0.46- 0.67]	Hours	<0.001	0.99 [ 0.98-0.99]	0.82 [ 0.74-0.88]	TRUE
5	Time in LPA	LFE, Vertical, 100cpm, Sandroff-1745	LFE, Vertical, 150cpm, Sandroff-1745	0.58 [ 0.46- 0.67]	Hours	<0.001	0.99 [ 0.98-0.99]	0.82 [ 0.74-0.88]	TRUE
5	Time in LPA	LFE, Vertical, 100cpm, Sandroff-1745	LFE, Vertical, 150cpm, Sandroff-1722	0.59 [ 0.46- 0.68]	Hours	<0.001	0.99 [ 0.98-0.99]	0.82 [ 0.74-0.88]	TRUE
5	Time in LPA	LFE, Vertical, 150cpm, Freedson	LFE, Vertical, 200cpm, Sandroff-1722	0.53 [ 0.48- 0.65]	Hours	<0.001	1.00 [ 0.99-1.00]	0.82 [ 0.74-0.88]	TRUE
5	Time in LPA	LFE, Vertical, 150cpm, Freedson	LFE, Vertical, 200cpm, Sandroff-Severity	0.48 [ 0.38- 0.59]	Hours	<0.001	0.96 [ 0.93-0.98]	0.81 [ 0.72-0.88]	TRUE
5	Time in LPA	LFE, Vertical, 200cpm, Sandroff-1722	Standard, Vertical, 200cpm, Sandroff-1584	0.51 [ 0.34- 0.63]	Hours	<0.001	0.97 [ 0.95-0.99]	0.81 [ 0.72-0.87]	TRUE
5	Time in LPA	LFE, Vertical, 100cpm, Sandroff-Severity	LFE, Vertical, 150cpm, Sandroff-1745	0.62 [ 0.48- 0.73]	Hours	<0.001	0.97 [ 0.95-0.99]	0.81 [ 0.72-0.87]	TRUE
5	Time in LPA	LFE, Vertical, 100cpm, Sandroff-1722	Standard, Vertical, 100cpm, Sandroff-1584	0.59 [ 0.43- 0.71]	Hours	<0.001	0.98 [ 0.95-0.99]	0.81 [ 0.72-0.87]	TRUE
5	Time in LPA	LFE, Vertical, 100cpm, Sandroff-1745	Standard, Vertical, 100cpm, Sandroff-1584	0.59 [ 0.43- 0.72]	Hours	<0.001	0.98 [ 0.96-0.99]	0.81 [ 0.72-0.87]	TRUE
5	Time in LPA	LFE, Vertical, 150cpm, Sandroff-1722	Standard, Vertical, 150cpm, Sandroff-1584	0.56 [ 0.40- 0.68]	Hours	<0.001	0.97 [ 0.95-0.99]	0.81 [ 0.71-0.87]	TRUE
5	Time in LPA	LFE, Vertical, 200cpm, Sandroff-1745	Standard, Vertical, 200cpm, Sandroff-1584	0.53 [ 0.35- 0.63]	Hours	<0.001	0.97 [ 0.95-0.99]	0.80 [ 0.71-0.87]	TRUE
5	Time in LPA	LFE, Vertical, 150cpm, Sandroff-1745	Standard, Vertical, 150cpm, Sandroff-1584	0.57 [ 0.41- 0.68]	Hours	<0.001	0.97 [ 0.95-0.99]	0.80 [ 0.71-0.87]	TRUE
5	Time in LPA	LFE, Vertical, 100cpm, Sandroff-Severity	LFE, Vertical, 150cpm, Sandroff-1722	0.63 [ 0.49- 0.73]	Hours	<0.001	0.97 [ 0.95-0.99]	0.80 [ 0.71-0.87]	TRUE
5	Time in LPA	LFE, Vertical, 100cpm, Sandroff-Severity	Standard, Vertical, 100cpm, Sandroff-1584	0.64 [ 0.52- 0.74]	Hours	<0.001	0.97 [ 0.95-0.99]	0.80 [ 0.71-0.87]	TRUE
5	Time in LPA	LFE, Vertical, 100cpm, Sandroff-1722	LFE, Vertical, 150cpm, Sandroff-Severity	0.52 [ 0.35- 0.68]	Hours	<0.001	0.95 [ 0.90-0.97]	0.80 [ 0.70-0.87]	TRUE
5	Time in LPA	LFE, Vertical, 100cpm, Sandroff-1745	LFE, Vertical, 150cpm, Sandroff-Severity	0.53 [ 0.35- 0.68]	Hours	<0.001	0.95 [ 0.91-0.97]	0.80 [ 0.70-0.87]	TRUE
5	Time in LPA	LFE, Vertical, 200cpm, Sandroff-Severity	Standard, Vertical, 200cpm, Sandroff-1584	0.54 [ 0.46- 0.68]	Hours	<0.001	0.97 [ 0.94-0.98]	0.80 [ 0.70-0.86]	TRUE
5	Time in LPA	LFE, Vertical, 150cpm, Sandroff-Severity	Standard, Vertical, 150cpm, Sandroff-1584	0.60 [ 0.50- 0.71]	Hours	<0.001	0.97 [ 0.95-0.98]	0.80 [ 0.70-0.86]	TRUE
5	Time in LPA	LFE, Vertical, 100cpm, Freedson	LFE, Vertical, 150cpm, Sandroff-1745	0.67 [ 0.57- 0.74]	Hours	<0.001	0.99 [ 0.99-1.00]	0.78 [ 0.69-0.85]	TRUE
5	Time in LPA	LFE, Vertical, 100cpm, Freedson	LFE, Vertical, 150cpm, Sandroff-1722	0.68 [ 0.58- 0.75]	Hours	<0.001	0.99 [ 0.99-1.00]	0.78 [ 0.69-0.84]	TRUE
5	Time in LPA	LFE, Vertical, 100cpm, Freedson	Standard, Vertical, 100cpm, Sandroff-1584	0.67 [ 0.55- 0.84]	Hours	<0.001	0.98 [ 0.97-0.99]	0.77 [ 0.67-0.84]	TRUE
5	Time in LPA	LFE, Vertical, 100cpm, Freedson	LFE, Vertical, 150cpm, Sandroff-Severity	0.59 [ 0.46- 0.75]	Hours	<0.001	0.96 [ 0.93-0.98]	0.77 [ 0.66-0.84]	TRUE
5	Time in LPA	LFE, Vertical, 200cpm, Freedson	Standard, Vertical, 200cpm, Sandroff-1584	0.59 [ 0.49- 0.73]	Hours	<0.001	0.98 [ 0.97-0.99]	0.76 [ 0.67-0.84]	TRUE
5	Time in LPA	LFE, Vertical, 150cpm, Freedson	Standard, Vertical, 150cpm, Sandroff-1584	0.65 [ 0.51- 0.77]	Hours	<0.001	0.98 [ 0.97-0.99]	0.76 [ 0.67-0.84]	TRUE
5	Time in LPA	LFE, Vertical, 100cpm, Freedson	Standard, VM, 200cpm, Sasaki	-0.52 [-0.98--0.34]	Hours	<0.001	0.86 [ 0.75-0.92]	0.73 [ 0.58-0.83]	TRUE
5	Time in LPA	Standard, VM, 100cpm, Sasaki	Standard, VM, 200cpm, Sasaki	0.97 [ 0.75- 1.16]	Hours	<0.001	0.98 [ 0.96-0.99]	0.71 [ 0.60-0.79]	TRUE
5	Time in LPA	LFE, Vertical, 100cpm, Sandroff-1745	Standard, VM, 200cpm, Sasaki	-0.61 [-1.09--0.41]	Hours	<0.001	0.86 [ 0.76-0.93]	0.70 [ 0.55-0.80]	TRUE
5	Time in LPA	LFE, Vertical, 100cpm, Sandroff-1722	Standard, VM, 200cpm, Sasaki	-0.63 [-1.09--0.42]	Hours	<0.001	0.87 [ 0.76-0.93]	0.70 [ 0.55-0.80]	TRUE
5	Time in LPA	LFE, Vertical, 100cpm, Sandroff-Severity	Standard, VM, 200cpm, Sasaki	-0.62 [-1.05--0.38]	Hours	<0.001	0.85 [ 0.73-0.92]	0.69 [ 0.54-0.80]	TRUE
5	Time in LPA	LFE, Vertical, 100cpm, Sandroff-1722	LFE, Vertical, 200cpm, Freedson	0.94 [ 0.70- 1.14]	Hours	<0.001	0.96 [ 0.92-0.98]	0.63 [ 0.50-0.73]	TRUE
5	Time in LPA	LFE, Vertical, 100cpm, Sandroff-1745	LFE, Vertical, 200cpm, Freedson	0.94 [ 0.71- 1.14]	Hours	<0.001	0.96 [ 0.92-0.98]	0.62 [ 0.50-0.72]	TRUE
5	Time in LPA	LFE, Vertical, 100cpm, Sandroff-Severity	LFE, Vertical, 200cpm, Freedson	0.94 [ 0.76- 1.14]	Hours	<0.001	0.96 [ 0.93-0.98]	0.62 [ 0.50-0.72]	TRUE
5	Time in LPA	Standard, Vertical, 100cpm, Sandroff-1584	Standard, Vertical, 200cpm, Sandroff-1584	0.97 [ 0.75- 1.09]	Hours	<0.001	0.97 [ 0.94-0.98]	0.59 [ 0.47-0.69]	TRUE
5	Time in LPA	LFE, Vertical, 100cpm, Freedson	LFE, Vertical, 200cpm, Freedson	1.03 [ 0.81- 1.22]	Hours	<0.001	0.97 [ 0.94-0.98]	0.59 [ 0.47-0.69]	TRUE
5	Time in LPA	LFE, Vertical, 100cpm, Sandroff-Severity	LFE, Vertical, 200cpm, Sandroff-Severity	1.03 [ 0.81- 1.22]	Hours	<0.001	0.97 [ 0.94-0.98]	0.58 [ 0.46-0.69]	TRUE
5	Time in LPA	LFE, Vertical, 100cpm, Sandroff-1722	LFE, Vertical, 200cpm, Sandroff-1745	1.02 [ 0.80- 1.21]	Hours	<0.001	0.97 [ 0.94-0.98]	0.58 [ 0.46-0.68]	TRUE
5	Time in LPA	LFE, Vertical, 100cpm, Sandroff-1722	LFE, Vertical, 200cpm, Sandroff-1722	1.03 [ 0.81- 1.22]	Hours	<0.001	0.97 [ 0.94-0.98]	0.58 [ 0.45-0.68]	TRUE
5	Time in LPA	LFE, Vertical, 100cpm, Sandroff-1745	LFE, Vertical, 200cpm, Sandroff-1745	1.03 [ 0.81- 1.22]	Hours	<0.001	0.97 [ 0.94-0.98]	0.58 [ 0.45-0.68]	TRUE
5	Time in LPA	LFE, Vertical, 100cpm, Sandroff-1745	LFE, Vertical, 200cpm, Sandroff-1722	1.04 [ 0.83- 1.22]	Hours	<0.001	0.97 [ 0.94-0.98]	0.57 [ 0.45-0.67]	TRUE
5	Time in LPA	LFE, Vertical, 100cpm, Sandroff-Severity	LFE, Vertical, 200cpm, Sandroff-1745	1.02 [ 0.88- 1.20]	Hours	<0.001	0.96 [ 0.93-0.98]	0.57 [ 0.44-0.67]	TRUE
5	Time in LPA	LFE, Vertical, 100cpm, Freedson	Standard, VM, 150cpm, Sasaki	-0.98 [-1.42--0.67]	Hours	<0.001	0.84 [ 0.71-0.91]	0.57 [ 0.42-0.70]	TRUE
5	Time in LPA	LFE, Vertical, 150cpm, Sandroff-1722	Standard, Vertical, 200cpm, Sandroff-1584	0.99 [ 0.73- 1.14]	Hours	<0.001	0.95 [ 0.90-0.97]	0.56 [ 0.44-0.67]	TRUE
5	Time in LPA	LFE, Vertical, 100cpm, Sandroff-Severity	LFE, Vertical, 200cpm, Sandroff-1722	1.02 [ 0.90- 1.22]	Hours	<0.001	0.96 [ 0.93-0.98]	0.56 [ 0.44-0.67]	TRUE
5	Time in LPA	LFE, Vertical, 150cpm, Sandroff-1745	Standard, Vertical, 200cpm, Sandroff-1584	0.99 [ 0.74- 1.15]	Hours	<0.001	0.95 [ 0.90-0.97]	0.56 [ 0.43-0.67]	TRUE
5	Time in LPA	LFE, Vertical, 150cpm, Sandroff-Severity	Standard, Vertical, 200cpm, Sandroff-1584	0.97 [ 0.79- 1.21]	Hours	<0.001	0.95 [ 0.91-0.97]	0.56 [ 0.43-0.67]	TRUE
5	Time in LPA	LFE, Vertical, 100cpm, Sandroff-1722	LFE, Vertical, 200cpm, Sandroff-Severity	0.99 [ 0.73- 1.17]	Hours	<0.001	0.91 [ 0.84-0.95]	0.56 [ 0.42-0.67]	TRUE
5	Time in LPA	LFE, Vertical, 100cpm, Sandroff-1745	LFE, Vertical, 200cpm, Sandroff-Severity	0.99 [ 0.74- 1.17]	Hours	<0.001	0.91 [ 0.84-0.95]	0.56 [ 0.42-0.67]	TRUE
5	Time in LPA	LFE, Vertical, 100cpm, Freedson	LFE, Vertical, 200cpm, Sandroff-1745	1.10 [ 0.96- 1.32]	Hours	<0.001	0.98 [ 0.96-0.99]	0.55 [ 0.42-0.65]	TRUE
5	Time in LPA	LFE, Vertical, 100cpm, Freedson	LFE, Vertical, 200cpm, Sandroff-1722	1.11 [ 0.96- 1.32]	Hours	<0.001	0.98 [ 0.96-0.99]	0.54 [ 0.42-0.64]	TRUE
5	Time in LPA	LFE, Vertical, 100cpm, Sandroff-1745	Standard, VM, 150cpm, Sasaki	-1.05 [-1.55--0.71]	Hours	<0.001	0.85 [ 0.73-0.92]	0.54 [ 0.39-0.66]	TRUE
5	Time in LPA	LFE, Vertical, 100cpm, Sandroff-1722	Standard, VM, 150cpm, Sasaki	-1.05 [-1.55--0.72]	Hours	<0.001	0.85 [ 0.74-0.92]	0.54 [ 0.39-0.66]	TRUE
5	Time in LPA	LFE, Vertical, 150cpm, Freedson	Standard, Vertical, 200cpm, Sandroff-1584	1.07 [ 0.85- 1.25]	Hours	<0.001	0.96 [ 0.93-0.98]	0.53 [ 0.41-0.64]	TRUE
5	Time in LPA	LFE, Vertical, 100cpm, Freedson	LFE, Vertical, 200cpm, Sandroff-Severity	1.08 [ 0.86- 1.33]	Hours	<0.001	0.93 [ 0.87-0.96]	0.53 [ 0.40-0.64]	TRUE
5	Time in LPA	LFE, Vertical, 100cpm, Sandroff-Severity	Standard, VM, 150cpm, Sasaki	-1.06 [-1.51--0.73]	Hours	<0.001	0.83 [ 0.70-0.90]	0.53 [ 0.38-0.66]	TRUE
5	Time in LPA	LFE, Vertical, 100cpm, Sandroff-1722	Standard, Vertical, 150cpm, Sandroff-1584	1.16 [ 0.87- 1.33]	Hours	<0.001	0.94 [ 0.89-0.97]	0.52 [ 0.39-0.63]	TRUE
5	Time in LPA	LFE, Vertical, 100cpm, Sandroff-1745	Standard, Vertical, 150cpm, Sandroff-1584	1.16 [ 0.88- 1.34]	Hours	<0.001	0.94 [ 0.89-0.97]	0.52 [ 0.39-0.63]	TRUE
5	Time in LPA	LFE, Vertical, 100cpm, Sandroff-Severity	Standard, Vertical, 150cpm, Sandroff-1584	1.14 [ 0.96- 1.39]	Hours	<0.001	0.95 [ 0.91-0.97]	0.52 [ 0.39-0.63]	TRUE
5	Time in LPA	LFE, Vertical, 100cpm, Freedson	Standard, Vertical, 150cpm, Sandroff-1584	1.21 [ 0.97- 1.46]	Hours	<0.001	0.95 [ 0.91-0.97]	0.49 [ 0.37-0.60]	TRUE
5	Time in LPA	LFE, Vertical, 150cpm, Freedson	Standard, VM, 200cpm, Sasaki	-1.14 [-1.53--0.80]	Hours	<0.001	0.82 [ 0.68-0.90]	0.47 [ 0.32-0.60]	TRUE
5	Time in LPA	LFE, Vertical, 150cpm, Sandroff-1745	Standard, VM, 200cpm, Sasaki	-1.24 [-1.66--0.86]	Hours	<0.001	0.83 [ 0.70-0.90]	0.44 [ 0.30-0.56]	TRUE
5	Time in LPA	LFE, Vertical, 150cpm, Sandroff-1722	Standard, VM, 200cpm, Sasaki	-1.24 [-1.68--0.87]	Hours	<0.001	0.83 [ 0.71-0.91]	0.44 [ 0.29-0.56]	TRUE
5	Time in LPA	LFE, Vertical, 150cpm, Sandroff-Severity	Standard, VM, 200cpm, Sasaki	-1.21 [-1.54--0.94]	Hours	<0.001	0.80 [ 0.66-0.89]	0.43 [ 0.28-0.56]	TRUE
5	Time in LPA	Standard, Vertical, 100cpm, Sandroff-1584	Standard, VM, 200cpm, Sasaki	-1.27 [-1.64--0.92]	Hours	<0.001	0.80 [ 0.65-0.89]	0.42 [ 0.28-0.55]	TRUE
5	Time in LPA	LFE, Vertical, 100cpm, Freedson	Standard, VM, 100cpm, Sasaki	-1.54 [-2.02--1.13]	Hours	<0.001	0.81 [ 0.66-0.89]	0.40 [ 0.26-0.52]	TRUE
5	Time in LPA	LFE, Vertical, 100cpm, Sandroff-1745	Standard, VM, 100cpm, Sasaki	-1.63 [-2.11--1.16]	Hours	<0.001	0.82 [ 0.69-0.90]	0.37 [ 0.24-0.49]	TRUE
5	Time in LPA	LFE, Vertical, 100cpm, Sandroff-1722	Standard, VM, 100cpm, Sasaki	-1.65 [-2.12--1.17]	Hours	<0.001	0.82 [ 0.69-0.90]	0.37 [ 0.24-0.49]	TRUE
5	Time in LPA	LFE, Vertical, 100cpm, Sandroff-Severity	Standard, VM, 100cpm, Sasaki	-1.61 [-2.09--1.24]	Hours	<0.001	0.79 [ 0.65-0.88]	0.37 [ 0.23-0.49]	TRUE
5	Time in LPA	LFE, Vertical, 100cpm, Sandroff-Severity	Standard, Vertical, 200cpm, Sandroff-1584	1.54 [ 1.29- 1.86]	Hours	<0.001	0.92 [ 0.85-0.96]	0.35 [ 0.24-0.45]	TRUE
5	Time in LPA	LFE, Vertical, 100cpm, Sandroff-1722	Standard, Vertical, 200cpm, Sandroff-1584	1.59 [ 1.18- 1.83]	Hours	<0.001	0.90 [ 0.82-0.95]	0.35 [ 0.23-0.45]	TRUE
5	Time in LPA	LFE, Vertical, 100cpm, Sandroff-1745	Standard, Vertical, 200cpm, Sandroff-1584	1.59 [ 1.20- 1.84]	Hours	<0.001	0.90 [ 0.82-0.95]	0.35 [ 0.23-0.45]	TRUE
5	Time in LPA	LFE, Vertical, 150cpm, Freedson	Standard, VM, 150cpm, Sasaki	-1.59 [-2.05--1.21]	Hours	<0.001	0.79 [ 0.64-0.88]	0.35 [ 0.22-0.47]	TRUE
5	Time in LPA	LFE, Vertical, 100cpm, Freedson	Standard, Vertical, 200cpm, Sandroff-1584	1.64 [ 1.30- 1.91]	Hours	<0.001	0.92 [ 0.85-0.96]	0.33 [ 0.22-0.43]	TRUE
5	Time in LPA	LFE, Vertical, 150cpm, Sandroff-1745	Standard, VM, 150cpm, Sasaki	-1.66 [-2.18--1.29]	Hours	<0.001	0.81 [ 0.66-0.89]	0.33 [ 0.21-0.44]	TRUE
5	Time in LPA	LFE, Vertical, 150cpm, Sandroff-1722	Standard, VM, 150cpm, Sasaki	-1.67 [-2.19--1.29]	Hours	<0.001	0.81 [ 0.67-0.89]	0.33 [ 0.20-0.44]	TRUE
5	Time in LPA	LFE, Vertical, 150cpm, Sandroff-Severity	Standard, VM, 150cpm, Sasaki	-1.68 [-2.10--1.30]	Hours	<0.001	0.77 [ 0.61-0.87]	0.32 [ 0.19-0.44]	TRUE
5	Time in LPA	Standard, Vertical, 100cpm, Sandroff-1584	Standard, VM, 150cpm, Sasaki	-1.72 [-2.08--1.32]	Hours	<0.001	0.77 [ 0.61-0.87]	0.32 [ 0.19-0.43]	TRUE
5	Time in LPA	LFE, Vertical, 200cpm, Freedson	Standard, VM, 200cpm, Sasaki	-1.64 [-2.07--1.23]	Hours	<0.001	0.77 [ 0.60-0.87]	0.31 [ 0.18-0.42]	TRUE
5	Time in LPA	LFE, Vertical, 200cpm, Sandroff-1745	Standard, VM, 200cpm, Sasaki	-1.74 [-2.16--1.32]	Hours	<0.001	0.78 [ 0.63-0.88]	0.29 [ 0.17-0.39]	TRUE
5	Time in LPA	LFE, Vertical, 200cpm, Sandroff-1722	Standard, VM, 200cpm, Sasaki	-1.75 [-2.17--1.33]	Hours	<0.001	0.78 [ 0.63-0.88]	0.28 [ 0.17-0.39]	TRUE
5	Time in LPA	LFE, Vertical, 200cpm, Sandroff-Severity	Standard, VM, 200cpm, Sasaki	-1.74 [-2.06--1.31]	Hours	<0.001	0.74 [ 0.57-0.85]	0.28 [ 0.16-0.39]	TRUE
5	Time in LPA	Standard, Vertical, 150cpm, Sandroff-1584	Standard, VM, 200cpm, Sasaki	-1.85 [-2.25--1.45]	Hours	<0.001	0.74 [ 0.56-0.85]	0.25 [ 0.14-0.36]	TRUE
5	Time in LPA	LFE, Vertical, 150cpm, Freedson	Standard, VM, 100cpm, Sasaki	-2.16 [-2.70--1.69]	Hours	<0.001	0.75 [ 0.58-0.86]	0.24 [ 0.14-0.34]	TRUE
5	Time in LPA	LFE, Vertical, 200cpm, Freedson	Standard, VM, 150cpm, Sasaki	-2.16 [-2.59--1.62]	Hours	<0.001	0.74 [ 0.56-0.85]	0.23 [ 0.13-0.33]	TRUE
5	Time in LPA	LFE, Vertical, 150cpm, Sandroff-1745	Standard, VM, 100cpm, Sasaki	-2.19 [-2.77--1.78]	Hours	<0.001	0.77 [ 0.61-0.87]	0.23 [ 0.13-0.32]	TRUE
5	Time in LPA	LFE, Vertical, 150cpm, Sandroff-1722	Standard, VM, 100cpm, Sasaki	-2.20 [-2.78--1.79]	Hours	<0.001	0.77 [ 0.61-0.87]	0.23 [ 0.13-0.32]	TRUE
5	Time in LPA	LFE, Vertical, 150cpm, Sandroff-Severity	Standard, VM, 100cpm, Sasaki	-2.27 [-2.75--1.77]	Hours	<0.001	0.73 [ 0.55-0.85]	0.22 [ 0.12-0.32]	TRUE
5	Time in LPA	Standard, Vertical, 100cpm, Sandroff-1584	Standard, VM, 100cpm, Sasaki	-2.29 [-2.79--1.87]	Hours	<0.001	0.74 [ 0.56-0.85]	0.22 [ 0.12-0.31]	TRUE
5	Time in LPA	LFE, Vertical, 200cpm, Sandroff-1745	Standard, VM, 150cpm, Sasaki	-2.18 [-2.65--1.68]	Hours	<0.001	0.76 [ 0.59-0.86]	0.22 [ 0.12-0.31]	TRUE
5	Time in LPA	LFE, Vertical, 200cpm, Sandroff-1722	Standard, VM, 150cpm, Sasaki	-2.19 [-2.66--1.69]	Hours	<0.001	0.76 [ 0.59-0.86]	0.22 [ 0.12-0.31]	TRUE
5	Time in LPA	LFE, Vertical, 200cpm, Sandroff-Severity	Standard, VM, 150cpm, Sasaki	-2.18 [-2.59--1.69]	Hours	<0.001	0.71 [ 0.52-0.83]	0.21 [ 0.11-0.30]	TRUE
5	Time in LPA	Standard, Vertical, 150cpm, Sandroff-1584	Standard, VM, 150cpm, Sasaki	-2.29 [-2.74--1.80]	Hours	<0.001	0.71 [ 0.52-0.83]	0.19 [ 0.10-0.28]	TRUE
5	Time in LPA	Standard, Vertical, 200cpm, Sandroff-1584	Standard, VM, 200cpm, Sasaki	-2.26 [-2.71--1.80]	Hours	<0.001	0.68 [ 0.48-0.82]	0.17 [ 0.09-0.25]	TRUE
5	Time in LPA	LFE, Vertical, 200cpm, Freedson	Standard, VM, 100cpm, Sasaki	-2.68 [-3.22--2.18]	Hours	<0.001	0.69 [ 0.49-0.82]	0.16 [ 0.08-0.24]	TRUE
5	Time in LPA	LFE, Vertical, 200cpm, Sandroff-1745	Standard, VM, 100cpm, Sasaki	-2.71 [-3.30--2.25]	Hours	<0.001	0.71 [ 0.52-0.84]	0.15 [ 0.08-0.23]	TRUE
5	Time in LPA	LFE, Vertical, 200cpm, Sandroff-1722	Standard, VM, 100cpm, Sasaki	-2.71 [-3.31--2.25]	Hours	<0.001	0.72 [ 0.53-0.84]	0.15 [ 0.08-0.22]	TRUE
5	Time in LPA	LFE, Vertical, 200cpm, Sandroff-Severity	Standard, VM, 100cpm, Sasaki	-2.79 [-3.21--2.17]	Hours	<0.001	0.66 [ 0.45-0.81]	0.15 [ 0.07-0.22]	TRUE
5	Time in LPA	Standard, Vertical, 150cpm, Sandroff-1584	Standard, VM, 100cpm, Sasaki	-2.89 [-3.36--2.39]	Hours	<0.001	0.67 [ 0.46-0.81]	0.14 [ 0.07-0.21]	TRUE
5	Time in LPA	Standard, Vertical, 200cpm, Sandroff-1584	Standard, VM, 150cpm, Sasaki	-2.71 [-3.26--2.25]	Hours	<0.001	0.65 [ 0.43-0.80]	0.13 [ 0.06-0.20]	TRUE
5	Time in LPA	Standard, Vertical, 200cpm, Sandroff-1584	Standard, VM, 100cpm, Sasaki	-3.27 [-3.84--2.77]	Hours	<0.001	0.61 [ 0.37-0.77]	0.09 [ 0.04-0.15]	TRUE
6	Sedentary time	LFE, Choi, 90min, Vertical, 100cpm	LFE, Zeros, 60min, Vertical, 100cpm	0.00 [-0.03- 0.14]	Hours	0.988	0.99 [ 0.98-0.99]	0.99 [ 0.98-0.99]	FALSE
6	Sedentary time	LFE, Choi, 90min, Vertical, 150cpm	LFE, Zeros, 60min, Vertical, 150cpm	0.00 [-0.03- 0.17]	Hours	0.987	0.99 [ 0.98-0.99]	0.99 [ 0.98-0.99]	FALSE
6	Sedentary time	LFE, Choi, 90min, Vertical, 200cpm	LFE, Zeros, 60min, Vertical, 200cpm	0.00 [-0.03- 0.17]	Hours	0.987	0.99 [ 0.98-0.99]	0.99 [ 0.98-0.99]	FALSE
6	Sedentary time	Standard, Choi, 90min, Vertical, 100cpm	Standard, Zeros, 60min, Vertical, 100cpm	0.00 [-0.03- 0.19]	Hours	0.986	0.99 [ 0.97-0.99]	0.99 [ 0.97-0.99]	FALSE
6	Sedentary time	Standard, Choi, 90min, Vertical, 150cpm	Standard, Zeros, 60min, Vertical, 150cpm	0.00 [-0.03- 0.19]	Hours	0.986	0.99 [ 0.97-0.99]	0.99 [ 0.97-0.99]	FALSE
6	Sedentary time	Standard, Choi, 90min, Vertical, 200cpm	Standard, Zeros, 60min, Vertical, 200cpm	0.00 [-0.03- 0.19]	Hours	0.986	0.99 [ 0.97-0.99]	0.98 [ 0.97-0.99]	FALSE
6	Sedentary time	Standard, Choi, 90min, VM, 150cpm	Standard, Zeros, 60min, VM, 150cpm	0.00 [-0.03- 0.19]	Hours	0.986	0.99 [ 0.97-0.99]	0.98 [ 0.97-0.99]	FALSE
6	Sedentary time	Standard, Choi, 90min, VM, 200cpm	Standard, Zeros, 60min, VM, 200cpm	0.00 [-0.03- 0.19]	Hours	0.986	0.99 [ 0.97-0.99]	0.98 [ 0.97-0.99]	FALSE
6	Sedentary time	Standard, Choi, 90min, VM, 100cpm	Standard, Zeros, 60min, VM, 100cpm	0.00 [-0.04- 0.19]	Hours	0.986	0.99 [ 0.97-0.99]	0.98 [ 0.97-0.99]	FALSE
6	Sedentary time	LFE, Choi, 90min, VM, 100cpm	LFE, Zeros, 60min, VM, 100cpm	0.00 [-0.06- 0.17]	Hours	0.989	0.99 [ 0.98-0.99]	0.99 [ 0.98-0.99]	FALSE
6	Sedentary time	LFE, Choi, 90min, VM, 150cpm	LFE, Zeros, 60min, VM, 150cpm	0.00 [-0.06- 0.17]	Hours	0.988	0.99 [ 0.98-0.99]	0.99 [ 0.98-0.99]	FALSE
6	Sedentary time	LFE, Choi, 90min, VM, 200cpm	LFE, Zeros, 60min, VM, 200cpm	0.00 [-0.06- 0.17]	Hours	0.988	0.99 [ 0.98-0.99]	0.99 [ 0.98-0.99]	FALSE
6	Sedentary time	LFE, Choi, 90min, VM, 150cpm	Standard, Choi, 90min, VM, 100cpm	0.00 [-0.08- 0.06]	Hours	0.994	0.99 [ 0.99-1.00]	0.99 [ 0.99-1.00]	FALSE
6	Sedentary time	LFE, Triano, 180min, VM, 150cpm	Standard, Triano, 180min, VM, 100cpm	0.00 [-0.09- 0.04]	Hours	0.995	1.00 [ 0.99-1.00]	0.99 [ 0.99-1.00]	FALSE
6	Sedentary time	LFE, Choi, 180min, VM, 150cpm	Standard, Choi, 180min, VM, 100cpm	0.00 [-0.09- 0.06]	Hours	0.994	0.99 [ 0.99-1.00]	0.99 [ 0.99-1.00]	FALSE
6	Sedentary time	LFE, Zeros, 90min, VM, 200cpm	Standard, Triano, 180min, VM, 150cpm	0.00 [-0.11- 0.23]	Hours	0.979	0.98 [ 0.96-0.99]	0.98 [ 0.96-0.99]	FALSE
6	Sedentary time	LFE, Triano, 90min, Vertical, 200cpm	Standard, Triano, 90min, Vertical, 150cpm	0.00 [-0.12- 0.14]	Hours	0.985	0.99 [ 0.97-0.99]	0.98 [ 0.97-0.99]	FALSE
6	Sedentary time	LFE, Triano, 180min, VM, 150cpm	Standard, Choi, 90min, VM, 100cpm	0.00 [-0.12- 0.15]	Hours	0.979	0.98 [ 0.96-0.99]	0.98 [ 0.96-0.99]	FALSE
6	Sedentary time	LFE, Zeros, 30min, VM, 200cpm	Standard, Zeros, 90min, VM, 100cpm	0.00 [-0.13- 0.24]	Hours	0.955	0.96 [ 0.92-0.98]	0.95 [ 0.92-0.97]	FALSE
6	Sedentary time	LFE, Choi, 180min, Vertical, 200cpm	Standard, Choi, 90min, Vertical, 150cpm	0.00 [-0.14- 0.22]	Hours	0.981	0.98 [ 0.96-0.99]	0.98 [ 0.96-0.99]	FALSE
6	Sedentary time	Standard, Choi, 90min, Vertical, 100cpm	Standard, Triano, 180min, Vertical, 100cpm	0.00 [-0.15- 0.08]	Hours	0.983	0.98 [ 0.97-0.99]	0.98 [ 0.96-0.99]	FALSE
6	Sedentary time	Standard, Choi, 90min, VM, 100cpm	Standard, Triano, 180min, VM, 100cpm	0.00 [-0.15- 0.08]	Hours	0.982	0.98 [ 0.97-0.99]	0.98 [ 0.96-0.99]	FALSE
6	Sedentary time	Standard, Choi, 90min, VM, 150cpm	Standard, Triano, 180min, VM, 150cpm	0.00 [-0.15- 0.08]	Hours	0.982	0.98 [ 0.97-0.99]	0.98 [ 0.96-0.99]	FALSE
6	Sedentary time	Standard, Choi, 90min, VM, 200cpm	Standard, Triano, 180min, VM, 200cpm	0.00 [-0.15- 0.08]	Hours	0.981	0.98 [ 0.97-0.99]	0.98 [ 0.96-0.99]	FALSE
6	Sedentary time	Standard, Choi, 180min, Vertical, 100cpm	Standard, Zeros, 90min, Vertical, 100cpm	0.00 [-0.17- 0.12]	Hours	0.980	0.98 [ 0.96-0.99]	0.98 [ 0.96-0.99]	FALSE
6	Sedentary time	Standard, Choi, 180min, Vertical, 200cpm	Standard, Zeros, 90min, Vertical, 200cpm	0.00 [-0.17- 0.12]	Hours	0.979	0.98 [ 0.96-0.99]	0.98 [ 0.96-0.99]	FALSE
6	Sedentary time	Standard, Choi, 180min, Vertical, 150cpm	Standard, Zeros, 90min, Vertical, 150cpm	0.00 [-0.17- 0.13]	Hours	0.980	0.98 [ 0.96-0.99]	0.98 [ 0.96-0.99]	FALSE
6	Sedentary time	Standard, Choi, 180min, VM, 100cpm	Standard, Zeros, 90min, VM, 100cpm	0.00 [-0.17- 0.18]	Hours	0.978	0.98 [ 0.96-0.99]	0.98 [ 0.96-0.99]	FALSE
6	Sedentary time	Standard, Choi, 180min, VM, 150cpm	Standard, Zeros, 90min, VM, 150cpm	0.00 [-0.17- 0.18]	Hours	0.978	0.98 [ 0.96-0.99]	0.98 [ 0.96-0.99]	FALSE
6	Sedentary time	Standard, Choi, 180min, VM, 200cpm	Standard, Zeros, 90min, VM, 200cpm	0.00 [-0.17- 0.18]	Hours	0.978	0.98 [ 0.96-0.99]	0.98 [ 0.96-0.99]	FALSE
6	Sedentary time	LFE, Choi, 180min, VM, 150cpm	Standard, Zeros, 90min, VM, 100cpm	0.00 [-0.17- 0.20]	Hours	0.978	0.98 [ 0.96-0.99]	0.98 [ 0.96-0.99]	FALSE
6	Sedentary time	Standard, Choi, 90min, Vertical, 150cpm	Standard, Triano, 180min, Vertical, 150cpm	0.00 [-0.18- 0.08]	Hours	0.983	0.98 [ 0.97-0.99]	0.98 [ 0.96-0.99]	FALSE
6	Sedentary time	Standard, Choi, 90min, Vertical, 200cpm	Standard, Triano, 180min, Vertical, 200cpm	0.00 [-0.18- 0.08]	Hours	0.983	0.98 [ 0.97-0.99]	0.98 [ 0.96-0.99]	FALSE
6	Sedentary time	LFE, Choi, 180min, Vertical, 100cpm	LFE, Zeros, 90min, Vertical, 100cpm	0.00 [-0.19- 0.00]	Hours	0.978	0.98 [ 0.96-0.99]	0.98 [ 0.96-0.99]	FALSE
6	Sedentary time	LFE, Choi, 180min, Vertical, 150cpm	LFE, Zeros, 90min, Vertical, 150cpm	0.00 [-0.19- 0.00]	Hours	0.978	0.98 [ 0.96-0.99]	0.98 [ 0.96-0.99]	FALSE
6	Sedentary time	LFE, Choi, 180min, Vertical, 200cpm	LFE, Zeros, 90min, Vertical, 200cpm	0.00 [-0.19- 0.00]	Hours	0.978	0.98 [ 0.96-0.99]	0.98 [ 0.96-0.99]	FALSE
6	Sedentary time	LFE, Choi, 180min, VM, 100cpm	LFE, Zeros, 90min, VM, 100cpm	0.00 [-0.19- 0.00]	Hours	0.979	0.98 [ 0.96-0.99]	0.98 [ 0.96-0.99]	FALSE
6	Sedentary time	LFE, Choi, 180min, VM, 150cpm	LFE, Zeros, 90min, VM, 150cpm	0.00 [-0.19- 0.00]	Hours	0.978	0.98 [ 0.96-0.99]	0.98 [ 0.96-0.99]	FALSE
6	Sedentary time	LFE, Choi, 180min, VM, 200cpm	LFE, Zeros, 90min, VM, 200cpm	0.00 [-0.19- 0.00]	Hours	0.977	0.98 [ 0.96-0.99]	0.98 [ 0.96-0.99]	FALSE
6	Sedentary time	LFE, Zeros, 60min, VM, 200cpm	Standard, Zeros, 30min, VM, 200cpm	0.00 [-0.23- 0.46]	Hours	0.892	0.89 [ 0.81-0.94]	0.89 [ 0.80-0.94]	FALSE
6	Sedentary time	LFE, Triano, 180min, VM, 100cpm	Standard, Zeros, 30min, VM, 100cpm	0.00 [-0.33- 0.43]	Hours	0.846	0.85 [ 0.73-0.91]	0.84 [ 0.72-0.91]	FALSE
6	Sedentary time	LFE, Zeros, 180min, VM, 100cpm	Standard, Triano, 90min, VM, 100cpm	0.00 [-0.40- 0.38]	Hours	0.916	0.92 [ 0.85-0.95]	0.91 [ 0.85-0.95]	FALSE
6	Sedentary time	LFE, Triano, 180min, VM, 100cpm	LFE, Triano, 30min, VM, 200cpm	0.00 [-0.45- 0.68]	Hours	0.721	0.72 [ 0.53-0.84]	0.68 [ 0.50-0.81]	FALSE
6	Sedentary time	Standard, Triano, 60min, VM, 200cpm	Standard, Zeros, 60min, VM, 150cpm	0.00 [-0.47- 0.27]	Hours	0.945	0.95 [ 0.90-0.97]	0.93 [ 0.88-0.96]	FALSE
6	Sedentary time	LFE, Triano, 180min, VM, 100cpm	Standard, Triano, 60min, VM, 100cpm	0.00 [-0.48- 0.34]	Hours	0.901	0.90 [ 0.82-0.95]	0.89 [ 0.81-0.93]	FALSE
6	Sedentary time	LFE, Choi, 90min, VM, 200cpm	LFE, Triano, 180min, VM, 200cpm	0.01 [-0.07- 0.08]	Hours	0.983	0.98 [ 0.97-0.99]	0.98 [ 0.97-0.99]	FALSE
6	Sedentary time	LFE, Triano, 180min, Vertical, 150cpm	Standard, Triano, 180min, Vertical, 100cpm	0.01 [-0.08- 0.08]	Hours	0.994	0.99 [ 0.99-1.00]	0.99 [ 0.99-1.00]	FALSE
6	Sedentary time	LFE, Choi, 90min, Vertical, 100cpm	LFE, Triano, 180min, Vertical, 100cpm	0.01 [-0.10- 0.08]	Hours	0.982	0.98 [ 0.97-0.99]	0.98 [ 0.96-0.99]	FALSE
6	Sedentary time	LFE, Zeros, 180min, VM, 150cpm	Standard, Zeros, 180min, VM, 100cpm	0.01 [-0.10- 0.10]	Hours	0.985	0.98 [ 0.97-0.99]	0.98 [ 0.97-0.99]	FALSE
6	Sedentary time	LFE, Choi, 90min, Vertical, 150cpm	LFE, Triano, 180min, Vertical, 150cpm	0.01 [-0.13- 0.08]	Hours	0.982	0.98 [ 0.97-0.99]	0.98 [ 0.96-0.99]	FALSE
6	Sedentary time	LFE, Choi, 90min, Vertical, 200cpm	LFE, Triano, 180min, Vertical, 200cpm	0.01 [-0.13- 0.08]	Hours	0.982	0.98 [ 0.97-0.99]	0.98 [ 0.96-0.99]	FALSE
6	Sedentary time	LFE, Triano, 60min, VM, 150cpm	LFE, Zeros, 30min, VM, 150cpm	0.01 [-0.16- 0.19]	Hours	0.977	0.98 [ 0.96-0.99]	0.98 [ 0.96-0.99]	FALSE
6	Sedentary time	LFE, Triano, 60min, VM, 200cpm	LFE, Zeros, 30min, VM, 200cpm	0.01 [-0.16- 0.19]	Hours	0.975	0.98 [ 0.95-0.99]	0.97 [ 0.95-0.99]	FALSE
6	Sedentary time	LFE, Triano, 60min, Vertical, 100cpm	LFE, Zeros, 30min, Vertical, 100cpm	0.01 [-0.18- 0.19]	Hours	0.976	0.98 [ 0.96-0.99]	0.97 [ 0.95-0.99]	FALSE
6	Sedentary time	LFE, Triano, 60min, Vertical, 150cpm	LFE, Zeros, 30min, Vertical, 150cpm	0.01 [-0.18- 0.19]	Hours	0.976	0.98 [ 0.96-0.99]	0.97 [ 0.95-0.98]	FALSE
6	Sedentary time	LFE, Triano, 60min, Vertical, 200cpm	LFE, Zeros, 30min, Vertical, 200cpm	0.01 [-0.18- 0.19]	Hours	0.977	0.98 [ 0.96-0.99]	0.97 [ 0.95-0.99]	FALSE
6	Sedentary time	LFE, Triano, 30min, Vertical, 200cpm	Standard, Triano, 30min, Vertical, 200cpm	0.01 [-0.24- 0.44]	Hours	0.852	0.85 [ 0.74-0.92]	0.83 [ 0.72-0.90]	FALSE
6	Sedentary time	LFE, Triano, 180min, Vertical, 200cpm	Standard, Triano, 60min, Vertical, 200cpm	0.01 [-0.29- 0.44]	Hours	0.880	0.88 [ 0.79-0.93]	0.87 [ 0.78-0.93]	FALSE
6	Sedentary time	LFE, Choi, 90min, VM, 200cpm	Standard, Triano, 60min, VM, 200cpm	0.01 [-0.33- 0.45]	Hours	0.915	0.92 [ 0.85-0.95]	0.89 [ 0.82-0.94]	FALSE
6	Sedentary time	LFE, Triano, 30min, VM, 200cpm	Standard, Triano, 60min, VM, 100cpm	0.01 [-0.51- 0.17]	Hours	0.866	0.87 [ 0.76-0.93]	0.85 [ 0.74-0.91]	FALSE
6	Sedentary time	Standard, Triano, 180min, VM, 150cpm	Standard, Triano, 30min, Vertical, 100cpm	0.01 [-0.60- 0.67]	Hours	0.380	0.38 [ 0.09-0.61]	0.36 [ 0.09-0.58]	FALSE
6	Sedentary time	LFE, Triano, 30min, VM, 200cpm	LFE, Zeros, 60min, VM, 100cpm	0.01 [-0.65- 0.58]	Hours	0.763	0.76 [ 0.60-0.87]	0.73 [ 0.57-0.83]	FALSE
6	Sedentary time	Standard, Triano, 30min, Vertical, 150cpm	Standard, Zeros, 180min, VM, 200cpm	0.01 [-1.17- 0.41]	Hours	0.386	0.39 [ 0.09-0.62]	0.36 [ 0.09-0.58]	FALSE
6	Sedentary time	LFE, Choi, 180min, Vertical, 150cpm	Standard, Choi, 180min, Vertical, 100cpm	0.02 [-0.06- 0.07]	Hours	0.995	0.99 [ 0.99-1.00]	0.99 [ 0.99-1.00]	FALSE
6	Sedentary time	LFE, Choi, 90min, VM, 100cpm	LFE, Triano, 180min, VM, 100cpm	0.02 [-0.06- 0.08]	Hours	0.985	0.98 [ 0.97-0.99]	0.98 [ 0.97-0.99]	FALSE
6	Sedentary time	LFE, Choi, 90min, Vertical, 150cpm	Standard, Choi, 90min, Vertical, 100cpm	0.02 [-0.07- 0.07]	Hours	0.994	0.99 [ 0.99-1.00]	0.99 [ 0.99-1.00]	FALSE
6	Sedentary time	LFE, Zeros, 180min, Vertical, 150cpm	Standard, Zeros, 180min, Vertical, 100cpm	0.02 [-0.07- 0.07]	Hours	0.987	0.99 [ 0.98-0.99]	0.98 [ 0.97-0.99]	FALSE
6	Sedentary time	LFE, Choi, 90min, VM, 150cpm	LFE, Triano, 180min, VM, 150cpm	0.02 [-0.07- 0.08]	Hours	0.984	0.98 [ 0.97-0.99]	0.98 [ 0.97-0.99]	FALSE
6	Sedentary time	LFE, Zeros, 60min, Vertical, 150cpm	Standard, Zeros, 60min, Vertical, 100cpm	0.02 [-0.07- 0.12]	Hours	0.994	0.99 [ 0.99-1.00]	0.99 [ 0.99-1.00]	FALSE
6	Sedentary time	LFE, Zeros, 90min, Vertical, 150cpm	Standard, Zeros, 90min, Vertical, 100cpm	0.02 [-0.07- 0.12]	Hours	0.992	0.99 [ 0.99-1.00]	0.99 [ 0.98-0.99]	FALSE
6	Sedentary time	LFE, Zeros, 60min, VM, 150cpm	Standard, Zeros, 60min, VM, 100cpm	0.02 [-0.09- 0.10]	Hours	0.992	0.99 [ 0.99-1.00]	0.99 [ 0.98-1.00]	FALSE
6	Sedentary time	Standard, Triano, 180min, Vertical, 100cpm	Standard, Zeros, 60min, Vertical, 100cpm	0.02 [-0.09- 0.21]	Hours	0.964	0.96 [ 0.93-0.98]	0.96 [ 0.92-0.98]	FALSE
6	Sedentary time	Standard, Triano, 180min, Vertical, 150cpm	Standard, Zeros, 60min, Vertical, 150cpm	0.02 [-0.09- 0.21]	Hours	0.964	0.96 [ 0.93-0.98]	0.96 [ 0.92-0.98]	FALSE
6	Sedentary time	Standard, Triano, 180min, Vertical, 200cpm	Standard, Zeros, 60min, Vertical, 200cpm	0.02 [-0.09- 0.21]	Hours	0.964	0.96 [ 0.93-0.98]	0.96 [ 0.92-0.98]	FALSE
6	Sedentary time	Standard, Triano, 180min, VM, 100cpm	Standard, Zeros, 60min, VM, 100cpm	0.02 [-0.09- 0.22]	Hours	0.965	0.97 [ 0.94-0.98]	0.96 [ 0.93-0.98]	FALSE
6	Sedentary time	Standard, Triano, 180min, VM, 150cpm	Standard, Zeros, 60min, VM, 150cpm	0.02 [-0.09- 0.22]	Hours	0.963	0.96 [ 0.93-0.98]	0.96 [ 0.93-0.98]	FALSE
6	Sedentary time	Standard, Triano, 180min, VM, 200cpm	Standard, Zeros, 60min, VM, 200cpm	0.02 [-0.09- 0.22]	Hours	0.962	0.96 [ 0.93-0.98]	0.96 [ 0.92-0.98]	FALSE
6	Sedentary time	Standard, Choi, 90min, VM, 150cpm	Standard, Zeros, 30min, VM, 200cpm	0.02 [-0.11- 0.51]	Hours	0.892	0.89 [ 0.81-0.94]	0.87 [ 0.78-0.93]	FALSE
6	Sedentary time	LFE, Triano, 180min, Vertical, 150cpm	Standard, Zeros, 60min, Vertical, 100cpm	0.02 [-0.14- 0.32]	Hours	0.956	0.96 [ 0.92-0.98]	0.95 [ 0.91-0.97]	FALSE
6	Sedentary time	LFE, Choi, 90min, Vertical, 200cpm	Standard, Zeros, 30min, Vertical, 200cpm	0.02 [-0.15- 0.36]	Hours	0.884	0.88 [ 0.79-0.94]	0.88 [ 0.78-0.93]	FALSE
6	Sedentary time	LFE, Triano, 60min, VM, 100cpm	LFE, Zeros, 30min, VM, 100cpm	0.02 [-0.16- 0.19]	Hours	0.978	0.98 [ 0.96-0.99]	0.98 [ 0.96-0.99]	FALSE
6	Sedentary time	LFE, Choi, 180min, VM, 100cpm	Standard, Zeros, 30min, VM, 100cpm	0.02 [-0.26- 0.49]	Hours	0.863	0.86 [ 0.76-0.92]	0.85 [ 0.74-0.91]	FALSE
6	Sedentary time	LFE, Triano, 180min, Vertical, 100cpm	LFE, Triano, 30min, Vertical, 200cpm	0.02 [-0.31- 0.93]	Hours	0.731	0.73 [ 0.55-0.85]	0.72 [ 0.53-0.83]	FALSE
6	Sedentary time	Standard, Triano, 180min, Vertical, 100cpm	Standard, Triano, 60min, Vertical, 150cpm	0.02 [-0.34- 0.39]	Hours	0.895	0.90 [ 0.81-0.94]	0.89 [ 0.81-0.94]	FALSE
6	Sedentary time	LFE, Zeros, 60min, VM, 200cpm	Standard, Triano, 60min, VM, 200cpm	0.02 [-0.37- 0.42]	Hours	0.931	0.93 [ 0.87-0.96]	0.92 [ 0.86-0.95]	FALSE
6	Sedentary time	LFE, Triano, 30min, Vertical, 200cpm	LFE, Zeros, 60min, Vertical, 100cpm	0.02 [-0.78- 0.37]	Hours	0.788	0.79 [ 0.64-0.88]	0.78 [ 0.62-0.87]	FALSE
6	Sedentary time	LFE, Zeros, 90min, Vertical, 200cpm	Standard, Choi, 90min, Vertical, 150cpm	0.03 [-0.07- 0.27]	Hours	0.985	0.99 [ 0.97-0.99]	0.98 [ 0.97-0.99]	FALSE
6	Sedentary time	LFE, Triano, 60min, VM, 200cpm	Standard, Triano, 60min, VM, 150cpm	0.03 [-0.09- 0.23]	Hours	0.966	0.97 [ 0.94-0.98]	0.96 [ 0.92-0.97]	FALSE
6	Sedentary time	LFE, Zeros, 90min, VM, 150cpm	Standard, Zeros, 90min, VM, 100cpm	0.03 [-0.10- 0.11]	Hours	0.991	0.99 [ 0.98-1.00]	0.99 [ 0.98-0.99]	FALSE
6	Sedentary time	LFE, Zeros, 90min, VM, 200cpm	Standard, Choi, 90min, VM, 150cpm	0.03 [-0.10- 0.23]	Hours	0.983	0.98 [ 0.97-0.99]	0.98 [ 0.97-0.99]	FALSE
6	Sedentary time	LFE, Choi, 90min, Vertical, 150cpm	Standard, Triano, 180min, Vertical, 100cpm	0.03 [-0.13- 0.11]	Hours	0.978	0.98 [ 0.96-0.99]	0.98 [ 0.96-0.99]	FALSE
6	Sedentary time	LFE, Choi, 90min, VM, 150cpm	Standard, Triano, 180min, VM, 100cpm	0.03 [-0.13- 0.12]	Hours	0.980	0.98 [ 0.96-0.99]	0.98 [ 0.96-0.99]	FALSE
6	Sedentary time	LFE, Choi, 90min, VM, 150cpm	Standard, Zeros, 60min, VM, 100cpm	0.03 [-0.13- 0.16]	Hours	0.977	0.98 [ 0.96-0.99]	0.97 [ 0.95-0.99]	FALSE
6	Sedentary time	LFE, Zeros, 90min, Vertical, 200cpm	Standard, Triano, 180min, Vertical, 150cpm	0.03 [-0.14- 0.24]	Hours	0.974	0.97 [ 0.95-0.99]	0.97 [ 0.95-0.99]	FALSE
6	Sedentary time	LFE, Triano, 180min, VM, 150cpm	Standard, Zeros, 60min, VM, 100cpm	0.03 [-0.14- 0.31]	Hours	0.961	0.96 [ 0.93-0.98]	0.96 [ 0.92-0.98]	FALSE
6	Sedentary time	Standard, Triano, 180min, VM, 100cpm	Standard, Triano, 60min, VM, 150cpm	0.03 [-0.38- 0.40]	Hours	0.896	0.90 [ 0.81-0.94]	0.88 [ 0.80-0.93]	FALSE
6	Sedentary time	LFE, Triano, 180min, VM, 150cpm	Standard, Triano, 60min, VM, 150cpm	0.03 [-0.38- 0.45]	Hours	0.892	0.89 [ 0.81-0.94]	0.88 [ 0.79-0.93]	FALSE
6	Sedentary time	LFE, Choi, 90min, VM, 100cpm	LFE, Triano, 30min, VM, 200cpm	0.03 [-0.59- 0.74]	Hours	0.745	0.75 [ 0.57-0.86]	0.70 [ 0.53-0.81]	FALSE
6	Sedentary time	LFE, Triano, 180min, Vertical, 150cpm	Standard, Choi, 90min, Vertical, 100cpm	0.04 [-0.09- 0.16]	Hours	0.979	0.98 [ 0.96-0.99]	0.97 [ 0.95-0.98]	FALSE
6	Sedentary time	LFE, Zeros, 90min, Vertical, 150cpm	Standard, Choi, 180min, Vertical, 100cpm	0.04 [-0.11- 0.25]	Hours	0.972	0.97 [ 0.95-0.98]	0.97 [ 0.95-0.98]	FALSE
6	Sedentary time	LFE, Triano, 60min, Vertical, 200cpm	Standard, Zeros, 90min, Vertical, 100cpm	0.04 [-0.16- 0.24]	Hours	0.945	0.94 [ 0.90-0.97]	0.94 [ 0.90-0.97]	FALSE
6	Sedentary time	LFE, Choi, 180min, Vertical, 200cpm	Standard, Zeros, 60min, Vertical, 150cpm	0.04 [-0.16- 0.34]	Hours	0.963	0.96 [ 0.93-0.98]	0.96 [ 0.92-0.98]	FALSE
6	Sedentary time	LFE, Triano, 60min, Vertical, 200cpm	Standard, Choi, 180min, Vertical, 100cpm	0.04 [-0.22- 0.30]	Hours	0.946	0.95 [ 0.90-0.97]	0.94 [ 0.90-0.97]	FALSE
6	Sedentary time	LFE, Triano, 180min, Vertical, 100cpm	Standard, Zeros, 30min, Vertical, 100cpm	0.04 [-0.23- 0.37]	Hours	0.848	0.85 [ 0.73-0.92]	0.84 [ 0.73-0.91]	FALSE
6	Sedentary time	Standard, Zeros, 30min, Vertical, 150cpm	Standard, Zeros, 60min, Vertical, 100cpm	0.04 [-0.24- 0.24]	Hours	0.929	0.93 [ 0.87-0.96]	0.93 [ 0.87-0.96]	FALSE
6	Sedentary time	LFE, Choi, 90min, Vertical, 200cpm	Standard, Triano, 60min, Vertical, 200cpm	0.04 [-0.31- 0.43]	Hours	0.903	0.90 [ 0.83-0.95]	0.90 [ 0.82-0.94]	FALSE
6	Sedentary time	Standard, Triano, 90min, Vertical, 150cpm	Standard, Zeros, 180min, Vertical, 100cpm	0.04 [-0.41- 0.29]	Hours	0.929	0.93 [ 0.87-0.96]	0.93 [ 0.87-0.96]	FALSE
6	Sedentary time	Standard, Triano, 90min, VM, 150cpm	Standard, Zeros, 180min, VM, 100cpm	0.04 [-0.51- 0.40]	Hours	0.923	0.92 [ 0.86-0.96]	0.92 [ 0.86-0.95]	FALSE
6	Sedentary time	LFE, Triano, 30min, Vertical, 100cpm	Standard, Choi, 180min, VM, 150cpm	0.04 [-0.63- 0.60]	Hours	0.635	0.63 [ 0.41-0.79]	0.62 [ 0.40-0.77]	FALSE
6	Sedentary time	LFE, Zeros, 90min, VM, 150cpm	Standard, Choi, 180min, VM, 100cpm	0.05 [-0.14- 0.27]	Hours	0.968	0.97 [ 0.94-0.98]	0.97 [ 0.94-0.98]	FALSE
6	Sedentary time	Standard, Choi, 90min, Vertical, 150cpm	Standard, Zeros, 30min, Vertical, 200cpm	0.05 [-0.16- 0.55]	Hours	0.908	0.91 [ 0.83-0.95]	0.89 [ 0.81-0.94]	FALSE
6	Sedentary time	LFE, Zeros, 30min, Vertical, 200cpm	Standard, Zeros, 90min, Vertical, 100cpm	0.05 [-0.17- 0.23]	Hours	0.963	0.96 [ 0.93-0.98]	0.96 [ 0.93-0.98]	FALSE
6	Sedentary time	Standard, Triano, 180min, Vertical, 100cpm	Standard, Zeros, 30min, Vertical, 150cpm	0.05 [-0.24- 0.35]	Hours	0.868	0.87 [ 0.77-0.93]	0.86 [ 0.76-0.92]	FALSE
6	Sedentary time	Standard, Choi, 90min, VM, 150cpm	Standard, Triano, 60min, VM, 200cpm	0.05 [-0.26- 0.49]	Hours	0.930	0.93 [ 0.87-0.96]	0.90 [ 0.84-0.94]	FALSE
6	Sedentary time	LFE, Choi, 180min, Vertical, 150cpm	LFE, Triano, 60min, Vertical, 200cpm	0.05 [-0.28- 0.26]	Hours	0.943	0.94 [ 0.90-0.97]	0.94 [ 0.90-0.97]	FALSE
6	Sedentary time	LFE, Triano, 30min, VM, 150cpm	Standard, Triano, 30min, VM, 150cpm	0.05 [-0.35- 0.27]	Hours	0.869	0.87 [ 0.77-0.93]	0.85 [ 0.75-0.92]	FALSE
6	Sedentary time	LFE, Triano, 180min, Vertical, 100cpm	Standard, Triano, 30min, Vertical, 200cpm	0.05 [-0.37- 1.09]	Hours	0.514	0.51 [ 0.25-0.71]	0.47 [ 0.23-0.66]	FALSE
6	Sedentary time	LFE, Triano, 30min, Vertical, 200cpm	Standard, Zeros, 30min, Vertical, 100cpm	0.05 [-0.40- 0.25]	Hours	0.944	0.94 [ 0.90-0.97]	0.93 [ 0.88-0.96]	FALSE
6	Sedentary time	LFE, Zeros, 30min, VM, 100cpm	Standard, Triano, 30min, VM, 150cpm	0.05 [-0.56- 1.20]	Hours	0.663	0.66 [ 0.45-0.80]	0.58 [ 0.39-0.73]	FALSE
6	Sedentary time	LFE, Zeros, 90min, VM, 200cpm	Standard, Triano, 30min, Vertical, 100cpm	0.05 [-0.64- 0.77]	Hours	0.377	0.38 [ 0.08-0.61]	0.35 [ 0.08-0.57]	FALSE
6	Sedentary time	LFE, Triano, 90min, Vertical, 100cpm	Standard, Triano, 30min, Vertical, 200cpm	0.05 [-0.68- 1.05]	Hours	0.530	0.53 [ 0.27-0.72]	0.50 [ 0.26-0.69]	FALSE
6	Sedentary time	LFE, Choi, 90min, Vertical, 150cpm	Standard, Zeros, 60min, Vertical, 100cpm	0.06 [-0.11- 0.18]	Hours	0.974	0.97 [ 0.95-0.99]	0.97 [ 0.95-0.98]	FALSE
6	Sedentary time	LFE, Zeros, 30min, VM, 200cpm	Standard, Triano, 60min, VM, 150cpm	0.06 [-0.14- 0.51]	Hours	0.950	0.95 [ 0.91-0.97]	0.94 [ 0.89-0.96]	FALSE
6	Sedentary time	LFE, Zeros, 60min, Vertical, 200cpm	Standard, Zeros, 30min, Vertical, 200cpm	0.06 [-0.16- 0.33]	Hours	0.916	0.92 [ 0.85-0.95]	0.91 [ 0.84-0.95]	FALSE
6	Sedentary time	LFE, Triano, 180min, Vertical, 150cpm	Standard, Zeros, 30min, Vertical, 150cpm	0.06 [-0.17- 0.35]	Hours	0.860	0.86 [ 0.75-0.92]	0.85 [ 0.74-0.92]	FALSE
6	Sedentary time	LFE, Choi, 180min, Vertical, 100cpm	Standard, Zeros, 30min, Vertical, 100cpm	0.06 [-0.17- 0.52]	Hours	0.866	0.87 [ 0.76-0.93]	0.85 [ 0.74-0.92]	FALSE
6	Sedentary time	Standard, Choi, 90min, Vertical, 150cpm	Standard, Triano, 60min, Vertical, 200cpm	0.06 [-0.28- 0.51]	Hours	0.925	0.92 [ 0.86-0.96]	0.91 [ 0.84-0.95]	FALSE
6	Sedentary time	LFE, Zeros, 30min, Vertical, 200cpm	Standard, Choi, 180min, Vertical, 100cpm	0.06 [-0.30- 0.34]	Hours	0.950	0.95 [ 0.91-0.97]	0.95 [ 0.91-0.97]	FALSE
6	Sedentary time	LFE, Zeros, 180min, VM, 150cpm	Standard, Zeros, 30min, VM, 200cpm	0.06 [-0.41- 0.48]	Hours	0.774	0.77 [ 0.61-0.87]	0.77 [ 0.61-0.87]	FALSE
6	Sedentary time	LFE, Triano, 90min, VM, 200cpm	LFE, Zeros, 180min, VM, 150cpm	0.06 [-0.45- 0.36]	Hours	0.914	0.91 [ 0.84-0.95]	0.91 [ 0.84-0.95]	FALSE
6	Sedentary time	LFE, Triano, 90min, Vertical, 200cpm	LFE, Zeros, 180min, Vertical, 150cpm	0.06 [-0.48- 0.32]	Hours	0.924	0.92 [ 0.86-0.96]	0.92 [ 0.86-0.96]	FALSE
6	Sedentary time	LFE, Triano, 30min, Vertical, 100cpm	Standard, Triano, 180min, VM, 150cpm	0.06 [-0.52- 0.64]	Hours	0.594	0.59 [ 0.35-0.76]	0.59 [ 0.35-0.75]	FALSE
6	Sedentary time	LFE, Zeros, 60min, VM, 100cpm	Standard, Triano, 30min, VM, 200cpm	0.06 [-0.77- 0.95]	Hours	0.574	0.57 [ 0.33-0.75]	0.50 [ 0.28-0.67]	FALSE
6	Sedentary time	LFE, Zeros, 60min, VM, 200cpm	Standard, Triano, 90min, VM, 150cpm	0.07 [-0.11- 0.30]	Hours	0.970	0.97 [ 0.94-0.98]	0.97 [ 0.94-0.98]	FALSE
6	Sedentary time	LFE, Triano, 60min, Vertical, 150cpm	LFE, Zeros, 90min, Vertical, 100cpm	0.07 [-0.17- 0.40]	Hours	0.932	0.93 [ 0.88-0.96]	0.93 [ 0.88-0.96]	FALSE
6	Sedentary time	LFE, Triano, 60min, VM, 200cpm	Standard, Choi, 180min, VM, 100cpm	0.07 [-0.23- 0.32]	Hours	0.935	0.94 [ 0.88-0.96]	0.93 [ 0.88-0.96]	FALSE
6	Sedentary time	LFE, Triano, 180min, VM, 200cpm	Standard, Zeros, 30min, VM, 200cpm	0.07 [-0.24- 0.57]	Hours	0.840	0.84 [ 0.72-0.91]	0.83 [ 0.71-0.90]	FALSE
6	Sedentary time	Standard, Choi, 180min, VM, 100cpm	Standard, Zeros, 30min, VM, 150cpm	0.07 [-0.24- 0.59]	Hours	0.859	0.86 [ 0.75-0.92]	0.84 [ 0.73-0.91]	FALSE
6	Sedentary time	Standard, Zeros, 30min, VM, 150cpm	Standard, Zeros, 60min, VM, 100cpm	0.07 [-0.26- 0.31]	Hours	0.908	0.91 [ 0.83-0.95]	0.90 [ 0.83-0.95]	FALSE
6	Sedentary time	LFE, Choi, 180min, Vertical, 100cpm	Standard, Triano, 60min, Vertical, 100cpm	0.07 [-0.28- 0.48]	Hours	0.881	0.88 [ 0.79-0.93]	0.87 [ 0.77-0.93]	FALSE
6	Sedentary time	Standard, Triano, 60min, Vertical, 150cpm	Standard, Zeros, 60min, Vertical, 100cpm	0.07 [-0.31- 0.41]	Hours	0.937	0.94 [ 0.89-0.97]	0.93 [ 0.88-0.96]	FALSE
6	Sedentary time	Standard, Triano, 60min, VM, 150cpm	Standard, Zeros, 60min, VM, 100cpm	0.07 [-0.32- 0.44]	Hours	0.943	0.94 [ 0.90-0.97]	0.93 [ 0.88-0.96]	FALSE
6	Sedentary time	LFE, Zeros, 30min, Vertical, 100cpm	Standard, Zeros, 180min, VM, 200cpm	0.07 [-0.35- 0.66]	Hours	0.789	0.79 [ 0.64-0.88]	0.78 [ 0.63-0.88]	FALSE
6	Sedentary time	LFE, Triano, 60min, Vertical, 100cpm	Standard, Zeros, 180min, VM, 200cpm	0.07 [-0.46- 0.62]	Hours	0.805	0.80 [ 0.66-0.89]	0.80 [ 0.66-0.89]	FALSE
6	Sedentary time	LFE, Triano, 180min, VM, 100cpm	Standard, Triano, 30min, VM, 200cpm	0.07 [-0.47- 1.08]	Hours	0.537	0.54 [ 0.28-0.72]	0.46 [ 0.24-0.64]	FALSE
6	Sedentary time	LFE, Triano, 30min, Vertical, 100cpm	Standard, Zeros, 90min, VM, 150cpm	0.07 [-0.75- 0.57]	Hours	0.629	0.63 [ 0.40-0.78]	0.61 [ 0.39-0.77]	FALSE
6	Sedentary time	LFE, Zeros, 30min, Vertical, 150cpm	LFE, Zeros, 90min, Vertical, 100cpm	0.08 [-0.09- 0.34]	Hours	0.944	0.94 [ 0.90-0.97]	0.94 [ 0.90-0.97]	FALSE
6	Sedentary time	LFE, Choi, 180min, VM, 200cpm	Standard, Zeros, 60min, VM, 150cpm	0.08 [-0.15- 0.35]	Hours	0.963	0.96 [ 0.93-0.98]	0.96 [ 0.93-0.98]	FALSE
6	Sedentary time	Standard, Triano, 90min, Vertical, 200cpm	Standard, Zeros, 90min, Vertical, 150cpm	0.08 [-0.18- 0.34]	Hours	0.972	0.97 [ 0.95-0.99]	0.97 [ 0.94-0.98]	FALSE
6	Sedentary time	LFE, Zeros, 180min, Vertical, 150cpm	Standard, Zeros, 30min, Vertical, 200cpm	0.08 [-0.28- 0.50]	Hours	0.825	0.82 [ 0.70-0.90]	0.82 [ 0.69-0.90]	FALSE
6	Sedentary time	LFE, Triano, 60min, VM, 200cpm	LFE, Zeros, 90min, VM, 150cpm	0.08 [-0.31- 0.30]	Hours	0.937	0.94 [ 0.89-0.97]	0.93 [ 0.88-0.96]	FALSE
6	Sedentary time	Standard, Choi, 90min, VM, 200cpm	Standard, Zeros, 180min, VM, 150cpm	0.08 [-0.39- 0.40]	Hours	0.948	0.95 [ 0.91-0.97]	0.95 [ 0.91-0.97]	FALSE
6	Sedentary time	LFE, Choi, 90min, VM, 100cpm	Standard, Triano, 30min, VM, 200cpm	0.08 [-0.65- 0.99]	Hours	0.565	0.56 [ 0.31-0.74]	0.48 [ 0.26-0.65]	FALSE
6	Sedentary time	LFE, Triano, 180min, Vertical, 200cpm	Standard, Zeros, 30min, Vertical, 200cpm	0.09 [-0.15- 0.40]	Hours	0.865	0.87 [ 0.76-0.93]	0.85 [ 0.74-0.92]	FALSE
6	Sedentary time	Standard, Triano, 60min, Vertical, 100cpm	Standard, Zeros, 30min, Vertical, 100cpm	0.09 [-0.16- 0.23]	Hours	0.932	0.93 [ 0.88-0.96]	0.92 [ 0.87-0.96]	FALSE
6	Sedentary time	Standard, Triano, 60min, Vertical, 150cpm	Standard, Zeros, 30min, Vertical, 150cpm	0.09 [-0.16- 0.24]	Hours	0.933	0.93 [ 0.88-0.96]	0.93 [ 0.87-0.96]	FALSE
6	Sedentary time	Standard, Triano, 60min, Vertical, 200cpm	Standard, Zeros, 30min, Vertical, 200cpm	0.09 [-0.16- 0.24]	Hours	0.933	0.93 [ 0.88-0.96]	0.93 [ 0.87-0.96]	FALSE
6	Sedentary time	LFE, Triano, 60min, Vertical, 200cpm	Standard, Triano, 180min, Vertical, 100cpm	0.09 [-0.17- 0.38]	Hours	0.949	0.95 [ 0.91-0.97]	0.95 [ 0.91-0.97]	FALSE
6	Sedentary time	LFE, Triano, 60min, VM, 200cpm	Standard, Zeros, 90min, VM, 100cpm	0.09 [-0.21- 0.27]	Hours	0.942	0.94 [ 0.89-0.97]	0.94 [ 0.89-0.97]	FALSE
6	Sedentary time	LFE, Zeros, 180min, VM, 150cpm	Standard, Triano, 90min, VM, 150cpm	0.09 [-0.29- 0.47]	Hours	0.913	0.91 [ 0.84-0.95]	0.91 [ 0.84-0.95]	FALSE
6	Sedentary time	Standard, Triano, 60min, VM, 100cpm	Standard, Zeros, 30min, VM, 100cpm	0.10 [-0.13- 0.24]	Hours	0.927	0.93 [ 0.87-0.96]	0.92 [ 0.86-0.96]	FALSE
6	Sedentary time	Standard, Triano, 60min, VM, 150cpm	Standard, Zeros, 30min, VM, 150cpm	0.10 [-0.13- 0.24]	Hours	0.924	0.92 [ 0.86-0.96]	0.92 [ 0.86-0.96]	FALSE
6	Sedentary time	LFE, Zeros, 30min, Vertical, 200cpm	Standard, Triano, 60min, Vertical, 150cpm	0.10 [-0.18- 0.38]	Hours	0.946	0.95 [ 0.90-0.97]	0.93 [ 0.88-0.96]	FALSE
6	Sedentary time	Standard, Triano, 90min, VM, 200cpm	Standard, Zeros, 90min, VM, 150cpm	0.10 [-0.22- 0.31]	Hours	0.973	0.97 [ 0.95-0.99]	0.97 [ 0.94-0.98]	FALSE
6	Sedentary time	LFE, Triano, 180min, VM, 200cpm	Standard, Triano, 60min, VM, 200cpm	0.10 [-0.25- 0.47]	Hours	0.889	0.89 [ 0.80-0.94]	0.87 [ 0.78-0.93]	FALSE
6	Sedentary time	LFE, Choi, 180min, VM, 150cpm	Standard, Zeros, 30min, VM, 150cpm	0.10 [-0.25- 0.58]	Hours	0.857	0.86 [ 0.75-0.92]	0.84 [ 0.73-0.91]	FALSE
6	Sedentary time	LFE, Triano, 30min, Vertical, 200cpm	LFE, Triano, 90min, Vertical, 100cpm	0.10 [-0.73- 0.54]	Hours	0.768	0.77 [ 0.61-0.87]	0.76 [ 0.60-0.86]	FALSE
6	Sedentary time	Standard, Triano, 30min, Vertical, 150cpm	Standard, Zeros, 90min, VM, 200cpm	0.10 [-0.89- 0.78]	Hours	0.414	0.41 [ 0.13-0.64]	0.39 [ 0.12-0.61]	FALSE
6	Sedentary time	Standard, Triano, 60min, VM, 200cpm	Standard, Zeros, 30min, VM, 200cpm	0.11 [-0.13- 0.24]	Hours	0.922	0.92 [ 0.86-0.96]	0.92 [ 0.85-0.95]	FALSE
6	Sedentary time	Standard, Choi, 180min, Vertical, 100cpm	Standard, Zeros, 30min, Vertical, 150cpm	0.11 [-0.17- 0.54]	Hours	0.884	0.88 [ 0.79-0.94]	0.87 [ 0.77-0.93]	FALSE
6	Sedentary time	LFE, Zeros, 90min, VM, 100cpm	Standard, Zeros, 30min, VM, 100cpm	0.11 [-0.19- 0.49]	Hours	0.862	0.86 [ 0.76-0.92]	0.85 [ 0.74-0.91]	FALSE
6	Sedentary time	Standard, Choi, 90min, Vertical, 200cpm	Standard, Zeros, 180min, Vertical, 150cpm	0.11 [-0.22- 0.34]	Hours	0.959	0.96 [ 0.92-0.98]	0.96 [ 0.92-0.98]	FALSE
6	Sedentary time	Standard, Triano, 60min, VM, 200cpm	Standard, Triano, 90min, VM, 150cpm	0.11 [-0.23- 0.36]	Hours	0.941	0.94 [ 0.89-0.97]	0.93 [ 0.88-0.96]	FALSE
6	Sedentary time	LFE, Zeros, 180min, Vertical, 100cpm	LFE, Zeros, 30min, Vertical, 150cpm	0.11 [-0.24- 0.61]	Hours	0.896	0.90 [ 0.81-0.94]	0.88 [ 0.80-0.93]	FALSE
6	Sedentary time	Standard, Choi, 180min, Vertical, 100cpm	Standard, Triano, 60min, Vertical, 150cpm	0.11 [-0.29- 0.53]	Hours	0.899	0.90 [ 0.82-0.94]	0.89 [ 0.80-0.94]	FALSE
6	Sedentary time	LFE, Zeros, 90min, VM, 100cpm	Standard, Triano, 60min, VM, 100cpm	0.11 [-0.40- 0.60]	Hours	0.913	0.91 [ 0.84-0.95]	0.89 [ 0.82-0.94]	FALSE
6	Sedentary time	LFE, Zeros, 180min, Vertical, 150cpm	Standard, Triano, 60min, Vertical, 200cpm	0.11 [-0.53- 0.56]	Hours	0.843	0.84 [ 0.72-0.91]	0.84 [ 0.72-0.91]	FALSE
6	Sedentary time	LFE, Triano, 30min, Vertical, 100cpm	LFE, Zeros, 180min, VM, 150cpm	0.11 [-0.60- 0.88]	Hours	0.496	0.50 [ 0.23-0.70]	0.48 [ 0.22-0.67]	FALSE
6	Sedentary time	Standard, Triano, 30min, Vertical, 100cpm	Standard, Zeros, 60min, VM, 150cpm	0.11 [-0.65- 0.80]	Hours	0.486	0.49 [ 0.21-0.69]	0.45 [ 0.20-0.65]	FALSE
6	Sedentary time	LFE, Zeros, 90min, Vertical, 100cpm	Standard, Triano, 60min, Vertical, 100cpm	0.12 [-0.32- 0.63]	Hours	0.884	0.88 [ 0.79-0.94]	0.87 [ 0.77-0.93]	FALSE
6	Sedentary time	LFE, Triano, 90min, Vertical, 150cpm	LFE, Zeros, 180min, Vertical, 100cpm	0.12 [-0.39- 0.49]	Hours	0.911	0.91 [ 0.84-0.95]	0.91 [ 0.84-0.95]	FALSE
6	Sedentary time	LFE, Zeros, 60min, Vertical, 100cpm	Standard, Triano, 30min, Vertical, 200cpm	0.12 [-0.61- 1.06]	Hours	0.582	0.58 [ 0.34-0.75]	0.54 [ 0.31-0.71]	FALSE
6	Sedentary time	LFE, Triano, 30min, Vertical, 100cpm	Standard, Choi, 90min, VM, 150cpm	0.12 [-0.63- 0.74]	Hours	0.649	0.65 [ 0.43-0.80]	0.63 [ 0.42-0.78]	FALSE
6	Sedentary time	LFE, Zeros, 180min, Vertical, 100cpm	Standard, Triano, 90min, Vertical, 100cpm	0.13 [-0.34- 0.47]	Hours	0.910	0.91 [ 0.84-0.95]	0.91 [ 0.84-0.95]	FALSE
6	Sedentary time	LFE, Triano, 30min, Vertical, 100cpm	LFE, Zeros, 90min, VM, 200cpm	0.13 [-0.68- 0.63]	Hours	0.583	0.58 [ 0.34-0.75]	0.57 [ 0.33-0.74]	FALSE
6	Sedentary time	LFE, Zeros, 180min, VM, 200cpm	Standard, Triano, 90min, VM, 200cpm	0.14 [-0.23- 0.56]	Hours	0.916	0.92 [ 0.85-0.95]	0.91 [ 0.84-0.95]	FALSE
6	Sedentary time	LFE, Zeros, 180min, Vertical, 150cpm	Standard, Triano, 90min, Vertical, 150cpm	0.14 [-0.29- 0.48]	Hours	0.919	0.92 [ 0.85-0.96]	0.91 [ 0.85-0.95]	FALSE
6	Sedentary time	LFE, Zeros, 30min, VM, 200cpm	Standard, Choi, 180min, VM, 100cpm	0.14 [-0.33- 0.34]	Hours	0.934	0.93 [ 0.88-0.96]	0.93 [ 0.88-0.96]	FALSE
6	Sedentary time	LFE, Choi, 90min, Vertical, 200cpm	LFE, Zeros, 180min, Vertical, 150cpm	0.15 [-0.18- 0.37]	Hours	0.945	0.94 [ 0.90-0.97]	0.94 [ 0.89-0.97]	FALSE
6	Sedentary time	LFE, Triano, 30min, VM, 200cpm	Standard, Triano, 30min, VM, 200cpm	0.15 [-0.25- 0.35]	Hours	0.875	0.88 [ 0.78-0.93]	0.85 [ 0.75-0.91]	FALSE
6	Sedentary time	LFE, Triano, 30min, VM, 200cpm	LFE, Triano, 90min, VM, 100cpm	0.15 [-0.55- 0.68]	Hours	0.762	0.76 [ 0.60-0.87]	0.72 [ 0.56-0.83]	FALSE
6	Sedentary time	LFE, Triano, 60min, VM, 200cpm	Standard, Triano, 180min, VM, 100cpm	0.16 [-0.17- 0.44]	Hours	0.941	0.94 [ 0.89-0.97]	0.94 [ 0.89-0.97]	FALSE
6	Sedentary time	LFE, Choi, 90min, VM, 200cpm	LFE, Zeros, 180min, VM, 150cpm	0.16 [-0.22- 0.39]	Hours	0.931	0.93 [ 0.88-0.96]	0.93 [ 0.88-0.96]	FALSE
6	Sedentary time	LFE, Choi, 180min, Vertical, 100cpm	LFE, Triano, 30min, Vertical, 200cpm	0.16 [-0.26- 0.95]	Hours	0.755	0.76 [ 0.59-0.86]	0.73 [ 0.56-0.84]	FALSE
6	Sedentary time	LFE, Choi, 180min, VM, 100cpm	LFE, Triano, 30min, VM, 200cpm	0.16 [-0.28- 0.74]	Hours	0.751	0.75 [ 0.58-0.86]	0.70 [ 0.53-0.82]	FALSE
6	Sedentary time	LFE, Zeros, 60min, Vertical, 200cpm	Standard, Zeros, 180min, Vertical, 100cpm	0.16 [-0.31- 0.39]	Hours	0.950	0.95 [ 0.91-0.97]	0.95 [ 0.91-0.97]	FALSE
6	Sedentary time	LFE, Choi, 180min, Vertical, 150cpm	Standard, Triano, 60min, Vertical, 150cpm	0.16 [-0.31- 0.54]	Hours	0.887	0.89 [ 0.80-0.94]	0.87 [ 0.78-0.93]	FALSE
6	Sedentary time	LFE, Triano, 90min, VM, 200cpm	Standard, Zeros, 180min, VM, 100cpm	0.16 [-0.49- 0.40]	Hours	0.919	0.92 [ 0.85-0.96]	0.92 [ 0.85-0.95]	FALSE
6	Sedentary time	Standard, Triano, 30min, Vertical, 100cpm	Standard, Triano, 90min, VM, 150cpm	0.16 [-0.52- 1.02]	Hours	0.430	0.43 [ 0.14-0.65]	0.40 [ 0.14-0.61]	FALSE
6	Sedentary time	LFE, Choi, 90min, Vertical, 100cpm	Standard, Triano, 30min, Vertical, 200cpm	0.16 [-0.52- 1.14]	Hours	0.539	0.54 [ 0.28-0.72]	0.50 [ 0.26-0.68]	FALSE
6	Sedentary time	LFE, Zeros, 30min, Vertical, 200cpm	Standard, Triano, 180min, Vertical, 100cpm	0.17 [-0.14- 0.35]	Hours	0.945	0.94 [ 0.90-0.97]	0.94 [ 0.90-0.97]	FALSE
6	Sedentary time	Standard, Triano, 60min, Vertical, 200cpm	Standard, Triano, 90min, Vertical, 150cpm	0.17 [-0.16- 0.39]	Hours	0.940	0.94 [ 0.89-0.97]	0.94 [ 0.89-0.97]	FALSE
6	Sedentary time	LFE, Choi, 90min, Vertical, 200cpm	Standard, Zeros, 180min, Vertical, 100cpm	0.17 [-0.17- 0.39]	Hours	0.954	0.95 [ 0.92-0.98]	0.95 [ 0.91-0.97]	FALSE
6	Sedentary time	LFE, Triano, 180min, VM, 200cpm	LFE, Zeros, 180min, VM, 150cpm	0.17 [-0.17- 0.42]	Hours	0.942	0.94 [ 0.89-0.97]	0.94 [ 0.89-0.97]	FALSE
6	Sedentary time	LFE, Zeros, 180min, Vertical, 200cpm	Standard, Triano, 90min, Vertical, 200cpm	0.17 [-0.22- 0.55]	Hours	0.918	0.92 [ 0.85-0.96]	0.91 [ 0.84-0.95]	FALSE
6	Sedentary time	LFE, Choi, 180min, VM, 100cpm	Standard, Triano, 60min, VM, 100cpm	0.17 [-0.36- 0.46]	Hours	0.909	0.91 [ 0.84-0.95]	0.89 [ 0.82-0.94]	FALSE
6	Sedentary time	LFE, Triano, 90min, Vertical, 200cpm	Standard, Zeros, 180min, Vertical, 100cpm	0.17 [-0.41- 0.32]	Hours	0.932	0.93 [ 0.88-0.96]	0.93 [ 0.88-0.96]	FALSE
6	Sedentary time	LFE, Zeros, 180min, VM, 150cpm	Standard, Triano, 60min, VM, 200cpm	0.17 [-0.51- 0.50]	Hours	0.843	0.84 [ 0.73-0.91]	0.83 [ 0.71-0.90]	FALSE
6	Sedentary time	LFE, Triano, 30min, Vertical, 150cpm	Standard, Zeros, 90min, VM, 200cpm	0.17 [-0.63- 0.83]	Hours	0.635	0.63 [ 0.41-0.79]	0.62 [ 0.40-0.77]	FALSE
6	Sedentary time	LFE, Zeros, 30min, VM, 200cpm	Standard, Triano, 180min, VM, 100cpm	0.18 [-0.19- 0.41]	Hours	0.931	0.93 [ 0.87-0.96]	0.93 [ 0.87-0.96]	FALSE
6	Sedentary time	Standard, Triano, 30min, Vertical, 100cpm	Standard, Zeros, 30min, VM, 200cpm	0.18 [-0.24- 0.71]	Hours	0.642	0.64 [ 0.42-0.79]	0.60 [ 0.39-0.75]	FALSE
6	Sedentary time	Standard, Triano, 30min, Vertical, 100cpm	Standard, Triano, 60min, VM, 200cpm	0.18 [-0.36- 0.83]	Hours	0.579	0.58 [ 0.33-0.75]	0.56 [ 0.32-0.73]	FALSE
6	Sedentary time	LFE, Zeros, 30min, VM, 150cpm	LFE, Zeros, 90min, VM, 100cpm	0.19 [-0.06- 0.44]	Hours	0.942	0.94 [ 0.89-0.97]	0.94 [ 0.89-0.97]	FALSE
6	Sedentary time	Standard, Choi, 180min, VM, 100cpm	Standard, Triano, 60min, VM, 150cpm	0.19 [-0.30- 0.56]	Hours	0.904	0.90 [ 0.83-0.95]	0.88 [ 0.80-0.93]	FALSE
6	Sedentary time	Standard, Triano, 180min, VM, 200cpm	Standard, Zeros, 180min, VM, 150cpm	0.20 [-0.09- 0.35]	Hours	0.958	0.96 [ 0.92-0.98]	0.95 [ 0.92-0.97]	FALSE
6	Sedentary time	LFE, Triano, 90min, VM, 150cpm	LFE, Zeros, 180min, VM, 100cpm	0.20 [-0.30- 0.54]	Hours	0.909	0.91 [ 0.84-0.95]	0.91 [ 0.84-0.95]	FALSE
6	Sedentary time	LFE, Triano, 30min, Vertical, 150cpm	LFE, Zeros, 180min, VM, 200cpm	0.20 [-0.35- 1.07]	Hours	0.503	0.50 [ 0.23-0.70]	0.48 [ 0.22-0.67]	FALSE
6	Sedentary time	LFE, Zeros, 60min, VM, 200cpm	Standard, Zeros, 180min, VM, 100cpm	0.20 [-0.38- 0.44]	Hours	0.937	0.94 [ 0.89-0.97]	0.94 [ 0.89-0.97]	FALSE
6	Sedentary time	LFE, Zeros, 90min, VM, 150cpm	Standard, Triano, 60min, VM, 150cpm	0.21 [-0.30- 0.65]	Hours	0.903	0.90 [ 0.83-0.95]	0.88 [ 0.79-0.93]	FALSE
6	Sedentary time	Standard, Triano, 180min, Vertical, 200cpm	Standard, Zeros, 180min, Vertical, 150cpm	0.22 [-0.12- 0.33]	Hours	0.960	0.96 [ 0.93-0.98]	0.96 [ 0.92-0.98]	FALSE
6	Sedentary time	LFE, Triano, 180min, Vertical, 200cpm	LFE, Zeros, 180min, Vertical, 150cpm	0.22 [-0.13- 0.36]	Hours	0.951	0.95 [ 0.91-0.97]	0.95 [ 0.91-0.97]	FALSE
6	Sedentary time	LFE, Choi, 180min, VM, 150cpm	Standard, Triano, 60min, VM, 150cpm	0.23 [-0.27- 0.48]	Hours	0.901	0.90 [ 0.82-0.95]	0.88 [ 0.79-0.93]	FALSE
6	Sedentary time	LFE, Triano, 30min, Vertical, 150cpm	Standard, Choi, 180min, VM, 200cpm	0.23 [-0.50- 0.75]	Hours	0.636	0.64 [ 0.41-0.79]	0.62 [ 0.41-0.78]	FALSE
6	Sedentary time	LFE, Triano, 60min, VM, 100cpm	Standard, Triano, 30min, VM, 150cpm	0.23 [-0.53- 0.91]	Hours	0.658	0.66 [ 0.44-0.80]	0.58 [ 0.39-0.73]	FALSE
6	Sedentary time	LFE, Triano, 60min, VM, 150cpm	LFE, Zeros, 90min, VM, 100cpm	0.24 [-0.16- 0.50]	Hours	0.941	0.94 [ 0.89-0.97]	0.93 [ 0.88-0.96]	FALSE
6	Sedentary time	LFE, Zeros, 180min, VM, 200cpm	Standard, Triano, 30min, Vertical, 100cpm	0.25 [-0.34- 1.26]	Hours	0.372	0.37 [ 0.08-0.61]	0.33 [ 0.07-0.55]	FALSE
6	Sedentary time	LFE, Choi, 90min, VM, 200cpm	Standard, Zeros, 180min, VM, 100cpm	0.26 [-0.29- 0.44]	Hours	0.939	0.94 [ 0.89-0.97]	0.94 [ 0.89-0.97]	FALSE
6	Sedentary time	Standard, Triano, 30min, Vertical, 150cpm	Standard, Zeros, 60min, VM, 200cpm	0.26 [-0.32- 0.94]	Hours	0.483	0.48 [ 0.21-0.69]	0.45 [ 0.20-0.65]	FALSE
6	Sedentary time	LFE, Triano, 30min, Vertical, 150cpm	Standard, Triano, 180min, VM, 200cpm	0.26 [-0.34- 0.86]	Hours	0.601	0.60 [ 0.36-0.77]	0.59 [ 0.36-0.75]	FALSE
6	Sedentary time	LFE, Triano, 30min, Vertical, 150cpm	Standard, Choi, 90min, VM, 200cpm	0.28 [-0.50- 0.95]	Hours	0.652	0.65 [ 0.43-0.80]	0.63 [ 0.42-0.78]	FALSE
6	Sedentary time	LFE, Triano, 30min, Vertical, 100cpm	Standard, Zeros, 180min, VM, 100cpm	0.28 [-0.53- 0.92]	Hours	0.524	0.52 [ 0.26-0.71]	0.50 [ 0.25-0.69]	FALSE
6	Sedentary time	LFE, Triano, 30min, Vertical, 200cpm	LFE, Zeros, 30min, Vertical, 100cpm	0.29 [-0.41- 0.71]	Hours	0.847	0.85 [ 0.73-0.92]	0.83 [ 0.71-0.90]	FALSE
6	Sedentary time	LFE, Triano, 30min, Vertical, 100cpm	Standard, Zeros, 60min, VM, 150cpm	0.30 [-0.56- 0.81]	Hours	0.699	0.70 [ 0.50-0.83]	0.68 [ 0.49-0.81]	FALSE
6	Sedentary time	LFE, Zeros, 90min, VM, 100cpm	Standard, Triano, 30min, VM, 200cpm	0.31 [-0.46- 1.14]	Hours	0.542	0.54 [ 0.29-0.73]	0.45 [ 0.23-0.62]	FALSE
6	Sedentary time	Standard, Triano, 30min, Vertical, 150cpm	Standard, Triano, 90min, VM, 200cpm	0.33 [-0.31- 1.14]	Hours	0.427	0.43 [ 0.14-0.65]	0.39 [ 0.13-0.60]	FALSE
6	Sedentary time	LFE, Triano, 30min, Vertical, 100cpm	LFE, Triano, 90min, VM, 200cpm	0.33 [-0.41- 1.04]	Hours	0.618	0.62 [ 0.39-0.78]	0.59 [ 0.36-0.75]	FALSE
6	Sedentary time	LFE, Triano, 30min, Vertical, 150cpm	Standard, Zeros, 180min, VM, 150cpm	0.34 [-0.35- 1.12]	Hours	0.541	0.54 [ 0.28-0.73]	0.52 [ 0.27-0.70]	FALSE
6	Sedentary time	LFE, Triano, 30min, Vertical, 200cpm	Standard, Zeros, 180min, VM, 200cpm	0.35 [-0.39- 1.18]	Hours	0.556	0.56 [ 0.30-0.74]	0.53 [ 0.29-0.71]	FALSE
6	Sedentary time	LFE, Triano, 30min, Vertical, 200cpm	LFE, Triano, 60min, Vertical, 100cpm	0.35 [-0.43- 0.61]	Hours	0.830	0.83 [ 0.70-0.91]	0.82 [ 0.69-0.90]	FALSE
6	Sedentary time	Standard, Triano, 30min, Vertical, 150cpm	Standard, Zeros, 180min, VM, 150cpm	0.35 [-0.86- 0.85]	Hours	0.348	0.35 [ 0.05-0.59]	0.32 [ 0.05-0.55]	FALSE
6	Sedentary time	Standard, Triano, 30min, Vertical, 100cpm	Standard, Zeros, 180min, VM, 100cpm	0.35 [-0.99- 0.85]	Hours	0.339	0.34 [ 0.04-0.58]	0.31 [ 0.04-0.54]	FALSE
6	Sedentary time	LFE, Triano, 30min, Vertical, 100cpm	LFE, Zeros, 60min, VM, 200cpm	0.37 [-0.54- 0.73]	Hours	0.652	0.65 [ 0.43-0.80]	0.63 [ 0.42-0.78]	FALSE
6	Sedentary time	Standard, Triano, 30min, Vertical, 200cpm	Standard, Zeros, 180min, VM, 200cpm	0.40 [-0.74- 0.91]	Hours	0.345	0.34 [ 0.05-0.59]	0.33 [ 0.05-0.56]	FALSE
6	Sedentary time	LFE, Triano, 30min, VM, 200cpm	LFE, Zeros, 30min, VM, 100cpm	0.42 [-0.14- 0.84]	Hours	0.819	0.82 [ 0.69-0.90]	0.77 [ 0.64-0.86]	FALSE
6	Sedentary time	Standard, Triano, 30min, Vertical, 100cpm	Standard, Zeros, 90min, VM, 100cpm	0.43 [-0.24- 1.33]	Hours	0.359	0.36 [ 0.06-0.60]	0.31 [ 0.06-0.53]	FALSE
6	Sedentary time	Standard, Triano, 30min, Vertical, 150cpm	Standard, Zeros, 90min, VM, 150cpm	0.45 [-0.34- 1.25]	Hours	0.375	0.37 [ 0.08-0.61]	0.33 [ 0.07-0.55]	FALSE
6	Sedentary time	LFE, Triano, 30min, Vertical, 100cpm	Standard, Triano, 90min, VM, 150cpm	0.47 [-0.19- 1.00]	Hours	0.647	0.65 [ 0.43-0.79]	0.62 [ 0.40-0.77]	FALSE
6	Sedentary time	LFE, Triano, 180min, VM, 200cpm	LFE, Zeros, 60min, VM, 200cpm	-0.01 [-0.12- 0.18]	Hours	0.972	0.97 [ 0.95-0.99]	0.97 [ 0.95-0.98]	FALSE
6	Sedentary time	LFE, Triano, 180min, VM, 100cpm	LFE, Zeros, 60min, VM, 100cpm	-0.01 [-0.12- 0.19]	Hours	0.977	0.98 [ 0.96-0.99]	0.98 [ 0.95-0.99]	FALSE
6	Sedentary time	LFE, Triano, 180min, VM, 150cpm	LFE, Zeros, 60min, VM, 150cpm	-0.01 [-0.12- 0.19]	Hours	0.975	0.97 [ 0.95-0.99]	0.97 [ 0.95-0.99]	FALSE
6	Sedentary time	LFE, Triano, 180min, Vertical, 100cpm	LFE, Zeros, 60min, Vertical, 100cpm	-0.01 [-0.13- 0.18]	Hours	0.970	0.97 [ 0.95-0.98]	0.97 [ 0.94-0.98]	FALSE
6	Sedentary time	LFE, Triano, 180min, Vertical, 150cpm	LFE, Zeros, 60min, Vertical, 150cpm	-0.01 [-0.13- 0.18]	Hours	0.969	0.97 [ 0.94-0.98]	0.97 [ 0.94-0.98]	FALSE
6	Sedentary time	LFE, Triano, 180min, Vertical, 200cpm	LFE, Zeros, 60min, Vertical, 200cpm	-0.01 [-0.13- 0.18]	Hours	0.969	0.97 [ 0.94-0.98]	0.97 [ 0.94-0.98]	FALSE
6	Sedentary time	LFE, Choi, 180min, Vertical, 200cpm	Standard, Triano, 180min, Vertical, 150cpm	-0.01 [-0.15- 0.07]	Hours	0.979	0.98 [ 0.96-0.99]	0.98 [ 0.96-0.99]	FALSE
6	Sedentary time	LFE, Choi, 90min, Vertical, 200cpm	Standard, Zeros, 60min, Vertical, 150cpm	-0.01 [-0.21- 0.12]	Hours	0.974	0.97 [ 0.95-0.99]	0.97 [ 0.95-0.99]	FALSE
6	Sedentary time	LFE, Zeros, 60min, Vertical, 150cpm	Standard, Zeros, 30min, Vertical, 150cpm	-0.01 [-0.21- 0.23]	Hours	0.912	0.91 [ 0.84-0.95]	0.91 [ 0.84-0.95]	FALSE
6	Sedentary time	LFE, Choi, 90min, VM, 200cpm	Standard, Zeros, 30min, VM, 200cpm	-0.01 [-0.23- 0.40]	Hours	0.867	0.87 [ 0.77-0.93]	0.86 [ 0.75-0.92]	FALSE
6	Sedentary time	LFE, Zeros, 60min, Vertical, 200cpm	Standard, Triano, 60min, Vertical, 200cpm	-0.01 [-0.31- 0.43]	Hours	0.923	0.92 [ 0.86-0.96]	0.92 [ 0.85-0.95]	FALSE
6	Sedentary time	LFE, Zeros, 180min, VM, 100cpm	LFE, Zeros, 30min, VM, 150cpm	-0.01 [-0.32- 0.69]	Hours	0.887	0.89 [ 0.80-0.94]	0.88 [ 0.79-0.93]	FALSE
6	Sedentary time	LFE, Triano, 30min, Vertical, 100cpm	Standard, Triano, 30min, Vertical, 100cpm	-0.01 [-0.33- 0.38]	Hours	0.856	0.86 [ 0.75-0.92]	0.84 [ 0.73-0.91]	FALSE
6	Sedentary time	LFE, Triano, 30min, VM, 200cpm	Standard, Zeros, 30min, VM, 100cpm	-0.01 [-0.35- 0.26]	Hours	0.921	0.92 [ 0.86-0.96]	0.90 [ 0.83-0.94]	FALSE
6	Sedentary time	Standard, Zeros, 180min, VM, 100cpm	Standard, Zeros, 30min, VM, 200cpm	-0.01 [-0.42- 0.49]	Hours	0.797	0.80 [ 0.65-0.89]	0.79 [ 0.65-0.88]	FALSE
6	Sedentary time	LFE, Triano, 30min, Vertical, 200cpm	Standard, Triano, 60min, Vertical, 100cpm	-0.01 [-0.49- 0.20]	Hours	0.885	0.89 [ 0.80-0.94]	0.88 [ 0.79-0.93]	FALSE
6	Sedentary time	LFE, Triano, 30min, VM, 150cpm	LFE, Triano, 60min, VM, 100cpm	-0.01 [-0.83- 0.23]	Hours	0.867	0.87 [ 0.76-0.93]	0.83 [ 0.72-0.90]	FALSE
6	Sedentary time	LFE, Choi, 180min, VM, 200cpm	Standard, Triano, 180min, VM, 150cpm	-0.02 [-0.12- 0.08]	Hours	0.982	0.98 [ 0.97-0.99]	0.98 [ 0.97-0.99]	FALSE
6	Sedentary time	LFE, Zeros, 60min, VM, 150cpm	Standard, Triano, 180min, VM, 100cpm	-0.02 [-0.26- 0.13]	Hours	0.971	0.97 [ 0.95-0.98]	0.97 [ 0.94-0.98]	FALSE
6	Sedentary time	LFE, Triano, 60min, Vertical, 200cpm	LFE, Zeros, 90min, Vertical, 150cpm	-0.02 [-0.26- 0.26]	Hours	0.939	0.94 [ 0.89-0.97]	0.94 [ 0.89-0.97]	FALSE
6	Sedentary time	LFE, Triano, 30min, Vertical, 150cpm	Standard, Triano, 30min, Vertical, 150cpm	-0.02 [-0.28- 0.39]	Hours	0.854	0.85 [ 0.74-0.92]	0.84 [ 0.73-0.91]	FALSE
6	Sedentary time	Standard, Triano, 180min, VM, 100cpm	Standard, Zeros, 30min, VM, 150cpm	-0.02 [-0.32- 0.37]	Hours	0.836	0.84 [ 0.71-0.91]	0.83 [ 0.71-0.90]	FALSE
6	Sedentary time	Standard, Zeros, 180min, Vertical, 150cpm	Standard, Zeros, 60min, Vertical, 200cpm	-0.02 [-0.34- 0.42]	Hours	0.949	0.95 [ 0.91-0.97]	0.95 [ 0.90-0.97]	FALSE
6	Sedentary time	LFE, Triano, 180min, VM, 150cpm	Standard, Zeros, 30min, VM, 150cpm	-0.02 [-0.34- 0.51]	Hours	0.839	0.84 [ 0.72-0.91]	0.83 [ 0.71-0.90]	FALSE
6	Sedentary time	Standard, Choi, 180min, VM, 150cpm	Standard, Triano, 30min, Vertical, 100cpm	-0.02 [-0.42- 0.92]	Hours	0.421	0.42 [ 0.13-0.64]	0.39 [ 0.13-0.60]	FALSE
6	Sedentary time	LFE, Zeros, 60min, VM, 150cpm	Standard, Triano, 60min, VM, 150cpm	-0.02 [-0.45- 0.43]	Hours	0.930	0.93 [ 0.87-0.96]	0.91 [ 0.86-0.95]	FALSE
6	Sedentary time	LFE, Zeros, 180min, Vertical, 100cpm	Standard, Zeros, 30min, Vertical, 150cpm	-0.02 [-0.50- 0.36]	Hours	0.805	0.81 [ 0.66-0.89]	0.80 [ 0.66-0.89]	FALSE
6	Sedentary time	LFE, Zeros, 180min, Vertical, 100cpm	Standard, Triano, 60min, Vertical, 150cpm	-0.02 [-0.68- 0.42]	Hours	0.828	0.83 [ 0.70-0.90]	0.83 [ 0.70-0.90]	FALSE
6	Sedentary time	Standard, Choi, 90min, VM, 150cpm	Standard, Triano, 30min, Vertical, 100cpm	-0.02 [-0.72- 0.65]	Hours	0.434	0.43 [ 0.15-0.65]	0.40 [ 0.14-0.61]	FALSE
6	Sedentary time	LFE, Choi, 180min, VM, 200cpm	Standard, Choi, 90min, VM, 150cpm	-0.03 [-0.13- 0.19]	Hours	0.980	0.98 [ 0.96-0.99]	0.98 [ 0.96-0.99]	FALSE
6	Sedentary time	LFE, Zeros, 30min, VM, 200cpm	LFE, Zeros, 90min, VM, 150cpm	-0.03 [-0.15- 0.25]	Hours	0.944	0.94 [ 0.90-0.97]	0.94 [ 0.89-0.97]	FALSE
6	Sedentary time	LFE, Zeros, 60min, VM, 150cpm	Standard, Choi, 90min, VM, 100cpm	-0.03 [-0.20- 0.09]	Hours	0.986	0.99 [ 0.97-0.99]	0.99 [ 0.97-0.99]	FALSE
6	Sedentary time	LFE, Zeros, 90min, Vertical, 200cpm	Standard, Choi, 180min, Vertical, 150cpm	-0.03 [-0.21- 0.10]	Hours	0.974	0.97 [ 0.95-0.99]	0.97 [ 0.95-0.99]	FALSE
6	Sedentary time	LFE, Choi, 180min, Vertical, 150cpm	Standard, Zeros, 90min, Vertical, 100cpm	-0.03 [-0.21- 0.18]	Hours	0.976	0.98 [ 0.96-0.99]	0.97 [ 0.95-0.99]	FALSE
6	Sedentary time	LFE, Zeros, 30min, Vertical, 200cpm	LFE, Zeros, 90min, Vertical, 150cpm	-0.03 [-0.22- 0.15]	Hours	0.951	0.95 [ 0.91-0.97]	0.95 [ 0.91-0.97]	FALSE
6	Sedentary time	LFE, Triano, 180min, Vertical, 150cpm	Standard, Choi, 180min, Vertical, 100cpm	-0.03 [-0.23- 0.07]	Hours	0.980	0.98 [ 0.96-0.99]	0.98 [ 0.96-0.99]	FALSE
6	Sedentary time	LFE, Triano, 180min, VM, 150cpm	Standard, Choi, 180min, VM, 100cpm	-0.03 [-0.24- 0.06]	Hours	0.974	0.97 [ 0.95-0.99]	0.97 [ 0.95-0.98]	FALSE
6	Sedentary time	LFE, Choi, 180min, VM, 200cpm	Standard, Triano, 30min, Vertical, 100cpm	-0.03 [-0.49- 0.78]	Hours	0.402	0.40 [ 0.11-0.63]	0.37 [ 0.11-0.59]	FALSE
6	Sedentary time	LFE, Triano, 90min, VM, 200cpm	Standard, Triano, 90min, VM, 150cpm	-0.04 [-0.12- 0.12]	Hours	0.990	0.99 [ 0.98-0.99]	0.99 [ 0.98-0.99]	FALSE
6	Sedentary time	LFE, Choi, 90min, Vertical, 150cpm	Standard, Zeros, 30min, Vertical, 150cpm	-0.04 [-0.16- 0.28]	Hours	0.879	0.88 [ 0.79-0.93]	0.87 [ 0.78-0.93]	FALSE
6	Sedentary time	LFE, Zeros, 60min, Vertical, 150cpm	Standard, Choi, 90min, Vertical, 100cpm	-0.04 [-0.18- 0.09]	Hours	0.989	0.99 [ 0.98-0.99]	0.99 [ 0.98-0.99]	FALSE
6	Sedentary time	LFE, Zeros, 60min, Vertical, 150cpm	Standard, Triano, 180min, Vertical, 100cpm	-0.04 [-0.18- 0.12]	Hours	0.970	0.97 [ 0.94-0.98]	0.97 [ 0.94-0.98]	FALSE
6	Sedentary time	LFE, Zeros, 60min, Vertical, 100cpm	Standard, Zeros, 30min, Vertical, 100cpm	-0.04 [-0.27- 0.19]	Hours	0.904	0.90 [ 0.83-0.95]	0.90 [ 0.83-0.95]	FALSE
6	Sedentary time	LFE, Triano, 180min, Vertical, 100cpm	Standard, Triano, 60min, Vertical, 100cpm	-0.04 [-0.34- 0.41]	Hours	0.871	0.87 [ 0.77-0.93]	0.87 [ 0.77-0.93]	FALSE
6	Sedentary time	Standard, Triano, 60min, Vertical, 200cpm	Standard, Zeros, 60min, Vertical, 150cpm	-0.04 [-0.41- 0.27]	Hours	0.938	0.94 [ 0.89-0.97]	0.93 [ 0.87-0.96]	FALSE
6	Sedentary time	Standard, Zeros, 30min, VM, 200cpm	Standard, Zeros, 60min, VM, 150cpm	-0.04 [-0.42- 0.12]	Hours	0.916	0.92 [ 0.85-0.95]	0.91 [ 0.83-0.95]	FALSE
6	Sedentary time	Standard, Triano, 60min, Vertical, 200cpm	Standard, Zeros, 180min, Vertical, 100cpm	-0.04 [-0.50- 0.64]	Hours	0.857	0.86 [ 0.75-0.92]	0.85 [ 0.75-0.92]	FALSE
6	Sedentary time	Standard, Triano, 60min, Vertical, 150cpm	Standard, Zeros, 90min, Vertical, 100cpm	-0.04 [-0.54- 0.31]	Hours	0.909	0.91 [ 0.84-0.95]	0.89 [ 0.81-0.94]	FALSE
6	Sedentary time	LFE, Triano, 30min, Vertical, 100cpm	Standard, Zeros, 60min, VM, 200cpm	-0.04 [-0.94- 0.30]	Hours	0.739	0.74 [ 0.56-0.85]	0.71 [ 0.53-0.83]	FALSE
6	Sedentary time	LFE, Zeros, 90min, Vertical, 200cpm	Standard, Zeros, 90min, Vertical, 150cpm	-0.05 [-0.17- 0.02]	Hours	0.993	0.99 [ 0.99-1.00]	0.99 [ 0.98-0.99]	FALSE
6	Sedentary time	LFE, Triano, 180min, Vertical, 200cpm	Standard, Zeros, 60min, Vertical, 150cpm	-0.05 [-0.26- 0.24]	Hours	0.956	0.96 [ 0.92-0.98]	0.95 [ 0.91-0.97]	FALSE
6	Sedentary time	LFE, Triano, 90min, Vertical, 150cpm	Standard, Zeros, 60min, Vertical, 100cpm	-0.05 [-0.29- 0.22]	Hours	0.964	0.96 [ 0.93-0.98]	0.96 [ 0.93-0.98]	FALSE
6	Sedentary time	LFE, Triano, 180min, Vertical, 150cpm	Standard, Triano, 60min, Vertical, 150cpm	-0.05 [-0.32- 0.40]	Hours	0.878	0.88 [ 0.78-0.93]	0.87 [ 0.78-0.93]	FALSE
6	Sedentary time	LFE, Zeros, 180min, VM, 100cpm	Standard, Triano, 60min, VM, 150cpm	-0.05 [-0.71- 0.27]	Hours	0.836	0.84 [ 0.71-0.91]	0.81 [ 0.68-0.89]	FALSE
6	Sedentary time	Standard, Triano, 30min, Vertical, 200cpm	Standard, Zeros, 30min, Vertical, 100cpm	-0.05 [-0.84- 0.41]	Hours	0.769	0.77 [ 0.61-0.87]	0.72 [ 0.56-0.83]	FALSE
6	Sedentary time	LFE, Triano, 180min, Vertical, 200cpm	Standard, Choi, 90min, Vertical, 150cpm	-0.06 [-0.17- 0.08]	Hours	0.979	0.98 [ 0.96-0.99]	0.97 [ 0.95-0.98]	FALSE
6	Sedentary time	LFE, Zeros, 30min, Vertical, 150cpm	Standard, Triano, 90min, Vertical, 100cpm	-0.06 [-0.34- 0.12]	Hours	0.966	0.97 [ 0.94-0.98]	0.96 [ 0.93-0.98]	FALSE
6	Sedentary time	Standard, Zeros, 180min, VM, 150cpm	Standard, Zeros, 60min, VM, 200cpm	-0.06 [-0.34- 0.45]	Hours	0.939	0.94 [ 0.89-0.97]	0.94 [ 0.89-0.97]	FALSE
6	Sedentary time	LFE, Choi, 90min, Vertical, 100cpm	LFE, Triano, 30min, Vertical, 200cpm	-0.06 [-0.35- 0.94]	Hours	0.747	0.75 [ 0.57-0.86]	0.73 [ 0.56-0.84]	FALSE
6	Sedentary time	LFE, Zeros, 180min, Vertical, 150cpm	LFE, Zeros, 60min, Vertical, 200cpm	-0.06 [-0.38- 0.40]	Hours	0.947	0.95 [ 0.90-0.97]	0.94 [ 0.90-0.97]	FALSE
6	Sedentary time	LFE, Choi, 180min, Vertical, 100cpm	LFE, Triano, 60min, Vertical, 150cpm	-0.06 [-0.42- 0.09]	Hours	0.935	0.94 [ 0.88-0.96]	0.93 [ 0.88-0.96]	FALSE
6	Sedentary time	Standard, Zeros, 30min, Vertical, 200cpm	Standard, Zeros, 60min, Vertical, 150cpm	-0.06 [-0.45- 0.14]	Hours	0.932	0.93 [ 0.88-0.96]	0.93 [ 0.87-0.96]	FALSE
6	Sedentary time	LFE, Triano, 30min, Vertical, 150cpm	Standard, Zeros, 180min, VM, 200cpm	-0.06 [-0.87- 0.66]	Hours	0.587	0.59 [ 0.34-0.76]	0.57 [ 0.34-0.74]	FALSE
6	Sedentary time	LFE, Triano, 90min, VM, 100cpm	Standard, Triano, 30min, VM, 200cpm	-0.06 [-0.87- 0.87]	Hours	0.558	0.56 [ 0.31-0.74]	0.49 [ 0.27-0.66]	FALSE
6	Sedentary time	LFE, Zeros, 60min, VM, 200cpm	Standard, Triano, 30min, Vertical, 100cpm	-0.06 [-0.96- 0.47]	Hours	0.446	0.45 [ 0.16-0.66]	0.41 [ 0.16-0.62]	FALSE
6	Sedentary time	LFE, Triano, 180min, VM, 200cpm	Standard, Choi, 90min, VM, 150cpm	-0.07 [-0.22- 0.04]	Hours	0.977	0.98 [ 0.96-0.99]	0.98 [ 0.96-0.99]	FALSE
6	Sedentary time	LFE, Choi, 90min, VM, 200cpm	Standard, Zeros, 60min, VM, 150cpm	-0.07 [-0.23- 0.11]	Hours	0.975	0.98 [ 0.95-0.99]	0.97 [ 0.95-0.99]	FALSE
6	Sedentary time	LFE, Triano, 180min, Vertical, 150cpm	Standard, Zeros, 90min, Vertical, 100cpm	-0.07 [-0.25- 0.07]	Hours	0.973	0.97 [ 0.95-0.99]	0.97 [ 0.94-0.98]	FALSE
6	Sedentary time	Standard, Choi, 90min, Vertical, 100cpm	Standard, Zeros, 30min, Vertical, 150cpm	-0.07 [-0.25- 0.32]	Hours	0.903	0.90 [ 0.83-0.95]	0.90 [ 0.82-0.95]	FALSE
6	Sedentary time	LFE, Choi, 180min, Vertical, 150cpm	LFE, Zeros, 30min, Vertical, 200cpm	-0.07 [-0.27- 0.27]	Hours	0.947	0.95 [ 0.90-0.97]	0.95 [ 0.90-0.97]	FALSE
6	Sedentary time	LFE, Zeros, 60min, VM, 150cpm	Standard, Zeros, 30min, VM, 150cpm	-0.07 [-0.31- 0.39]	Hours	0.888	0.89 [ 0.80-0.94]	0.88 [ 0.80-0.93]	FALSE
6	Sedentary time	LFE, Choi, 90min, VM, 150cpm	Standard, Zeros, 30min, VM, 150cpm	-0.07 [-0.34- 0.36]	Hours	0.866	0.87 [ 0.76-0.93]	0.86 [ 0.75-0.92]	FALSE
6	Sedentary time	LFE, Choi, 90min, VM, 150cpm	Standard, Triano, 60min, VM, 150cpm	-0.07 [-0.42- 0.43]	Hours	0.916	0.92 [ 0.85-0.95]	0.89 [ 0.82-0.94]	FALSE
6	Sedentary time	LFE, Zeros, 180min, VM, 200cpm	Standard, Zeros, 60min, VM, 200cpm	-0.07 [-0.44- 0.43]	Hours	0.918	0.92 [ 0.85-0.96]	0.92 [ 0.85-0.96]	FALSE
6	Sedentary time	Standard, Choi, 90min, VM, 100cpm	Standard, Triano, 60min, VM, 150cpm	-0.07 [-0.46- 0.37]	Hours	0.929	0.93 [ 0.87-0.96]	0.91 [ 0.85-0.95]	FALSE
6	Sedentary time	LFE, Triano, 30min, Vertical, 100cpm	Standard, Triano, 90min, VM, 200cpm	-0.07 [-0.61- 0.59]	Hours	0.693	0.69 [ 0.49-0.82]	0.68 [ 0.49-0.81]	FALSE
6	Sedentary time	LFE, Choi, 90min, VM, 200cpm	Standard, Triano, 30min, Vertical, 100cpm	-0.07 [-0.72- 0.48]	Hours	0.394	0.39 [ 0.10-0.62]	0.36 [ 0.10-0.58]	FALSE
6	Sedentary time	LFE, Choi, 90min, Vertical, 100cpm	Standard, Zeros, 30min, Vertical, 100cpm	-0.08 [-0.19- 0.24]	Hours	0.870	0.87 [ 0.77-0.93]	0.87 [ 0.77-0.93]	FALSE
6	Sedentary time	LFE, Zeros, 90min, VM, 200cpm	Standard, Choi, 180min, VM, 150cpm	-0.08 [-0.25- 0.15]	Hours	0.967	0.97 [ 0.94-0.98]	0.97 [ 0.94-0.98]	FALSE
6	Sedentary time	LFE, Choi, 180min, VM, 150cpm	LFE, Zeros, 30min, VM, 200cpm	-0.08 [-0.33- 0.33]	Hours	0.935	0.94 [ 0.88-0.96]	0.93 [ 0.88-0.96]	FALSE
6	Sedentary time	LFE, Triano, 180min, Vertical, 150cpm	LFE, Triano, 60min, Vertical, 200cpm	-0.08 [-0.34- 0.18]	Hours	0.949	0.95 [ 0.91-0.97]	0.95 [ 0.91-0.97]	FALSE
6	Sedentary time	Standard, Triano, 60min, VM, 150cpm	Standard, Zeros, 90min, VM, 100cpm	-0.08 [-0.54- 0.29]	Hours	0.916	0.92 [ 0.85-0.95]	0.89 [ 0.82-0.94]	FALSE
6	Sedentary time	LFE, Triano, 30min, VM, 150cpm	LFE, Zeros, 30min, VM, 100cpm	-0.08 [-0.62- 0.32]	Hours	0.870	0.87 [ 0.77-0.93]	0.83 [ 0.72-0.89]	FALSE
6	Sedentary time	LFE, Triano, 90min, Vertical, 150cpm	LFE, Zeros, 60min, Vertical, 150cpm	-0.09 [-0.20- 0.05]	Hours	0.975	0.97 [ 0.95-0.99]	0.97 [ 0.95-0.99]	FALSE
6	Sedentary time	LFE, Triano, 90min, Vertical, 200cpm	LFE, Zeros, 60min, Vertical, 200cpm	-0.09 [-0.20- 0.05]	Hours	0.975	0.98 [ 0.95-0.99]	0.97 [ 0.95-0.99]	FALSE
6	Sedentary time	LFE, Choi, 180min, VM, 150cpm	LFE, Triano, 60min, VM, 200cpm	-0.09 [-0.32- 0.22]	Hours	0.937	0.94 [ 0.89-0.97]	0.93 [ 0.88-0.96]	FALSE
6	Sedentary time	LFE, Triano, 90min, VM, 150cpm	Standard, Zeros, 60min, VM, 100cpm	-0.09 [-0.33- 0.11]	Hours	0.968	0.97 [ 0.94-0.98]	0.97 [ 0.94-0.98]	FALSE
6	Sedentary time	LFE, Zeros, 90min, Vertical, 200cpm	Standard, Triano, 90min, Vertical, 200cpm	-0.09 [-0.34- 0.16]	Hours	0.962	0.96 [ 0.93-0.98]	0.96 [ 0.93-0.98]	FALSE
6	Sedentary time	Standard, Triano, 90min, Vertical, 150cpm	Standard, Zeros, 30min, Vertical, 200cpm	-0.09 [-0.35- 0.25]	Hours	0.910	0.91 [ 0.84-0.95]	0.91 [ 0.84-0.95]	FALSE
6	Sedentary time	LFE, Zeros, 180min, Vertical, 200cpm	Standard, Zeros, 60min, Vertical, 200cpm	-0.09 [-0.36- 0.38]	Hours	0.935	0.93 [ 0.88-0.96]	0.93 [ 0.87-0.96]	FALSE
6	Sedentary time	LFE, Zeros, 90min, VM, 200cpm	Standard, Triano, 90min, VM, 200cpm	-0.09 [-0.37- 0.15]	Hours	0.961	0.96 [ 0.93-0.98]	0.95 [ 0.92-0.97]	FALSE
6	Sedentary time	LFE, Choi, 90min, Vertical, 150cpm	Standard, Triano, 60min, Vertical, 150cpm	-0.09 [-0.37- 0.42]	Hours	0.900	0.90 [ 0.82-0.95]	0.89 [ 0.81-0.94]	FALSE
6	Sedentary time	LFE, Choi, 90min, Vertical, 100cpm	Standard, Triano, 60min, Vertical, 100cpm	-0.09 [-0.41- 0.46]	Hours	0.895	0.90 [ 0.81-0.94]	0.89 [ 0.81-0.94]	FALSE
6	Sedentary time	LFE, Triano, 60min, VM, 100cpm	Standard, Triano, 30min, VM, 200cpm	-0.09 [-0.91- 0.54]	Hours	0.614	0.61 [ 0.38-0.77]	0.55 [ 0.34-0.71]	FALSE
6	Sedentary time	Standard, Triano, 30min, Vertical, 100cpm	Standard, Zeros, 90min, VM, 150cpm	-0.09 [-0.96- 0.62]	Hours	0.415	0.41 [ 0.13-0.64]	0.38 [ 0.12-0.59]	FALSE
6	Sedentary time	Standard, Zeros, 180min, Vertical, 100cpm	Standard, Zeros, 30min, Vertical, 200cpm	-0.10 [-0.28- 0.43]	Hours	0.841	0.84 [ 0.72-0.91]	0.84 [ 0.72-0.91]	FALSE
6	Sedentary time	LFE, Triano, 90min, Vertical, 200cpm	Standard, Zeros, 30min, Vertical, 200cpm	-0.10 [-0.33- 0.18]	Hours	0.892	0.89 [ 0.81-0.94]	0.89 [ 0.81-0.94]	FALSE
6	Sedentary time	LFE, Triano, 90min, Vertical, 200cpm	Standard, Triano, 60min, Vertical, 200cpm	-0.10 [-0.35- 0.21]	Hours	0.911	0.91 [ 0.84-0.95]	0.91 [ 0.84-0.95]	FALSE
6	Sedentary time	Standard, Choi, 180min, Vertical, 150cpm	Standard, Triano, 90min, Vertical, 200cpm	-0.10 [-0.37- 0.36]	Hours	0.960	0.96 [ 0.93-0.98]	0.96 [ 0.92-0.98]	FALSE
6	Sedentary time	LFE, Zeros, 60min, Vertical, 100cpm	Standard, Triano, 60min, Vertical, 100cpm	-0.10 [-0.39- 0.38]	Hours	0.918	0.92 [ 0.85-0.96]	0.91 [ 0.85-0.95]	FALSE
6	Sedentary time	LFE, Triano, 90min, Vertical, 150cpm	Standard, Zeros, 30min, Vertical, 150cpm	-0.10 [-0.40- 0.12]	Hours	0.887	0.89 [ 0.80-0.94]	0.89 [ 0.80-0.94]	FALSE
6	Sedentary time	Standard, Choi, 90min, Vertical, 100cpm	Standard, Triano, 60min, Vertical, 150cpm	-0.10 [-0.40- 0.38]	Hours	0.922	0.92 [ 0.86-0.96]	0.91 [ 0.85-0.95]	FALSE
6	Sedentary time	LFE, Zeros, 180min, Vertical, 150cpm	Standard, Zeros, 60min, Vertical, 150cpm	-0.10 [-0.41- 0.38]	Hours	0.934	0.93 [ 0.88-0.96]	0.93 [ 0.87-0.96]	FALSE
6	Sedentary time	LFE, Zeros, 180min, VM, 150cpm	LFE, Zeros, 60min, VM, 200cpm	-0.10 [-0.42- 0.46]	Hours	0.937	0.94 [ 0.89-0.97]	0.94 [ 0.89-0.97]	FALSE
6	Sedentary time	LFE, Triano, 30min, VM, 100cpm	Standard, Triano, 30min, VM, 100cpm	-0.10 [-0.43- 0.20]	Hours	0.870	0.87 [ 0.77-0.93]	0.86 [ 0.76-0.92]	FALSE
6	Sedentary time	LFE, Triano, 180min, VM, 200cpm	Standard, Triano, 30min, Vertical, 100cpm	-0.10 [-0.73- 0.50]	Hours	0.365	0.36 [ 0.07-0.60]	0.34 [ 0.07-0.57]	FALSE
6	Sedentary time	LFE, Triano, 30min, Vertical, 200cpm	LFE, Zeros, 90min, Vertical, 100cpm	-0.10 [-0.94- 0.24]	Hours	0.737	0.74 [ 0.56-0.85]	0.70 [ 0.52-0.82]	FALSE
6	Sedentary time	LFE, Choi, 180min, Vertical, 200cpm	Standard, Zeros, 90min, Vertical, 150cpm	-0.11 [-0.30- 0.08]	Hours	0.974	0.97 [ 0.95-0.99]	0.97 [ 0.95-0.98]	FALSE
6	Sedentary time	LFE, Zeros, 60min, Vertical, 150cpm	Standard, Triano, 60min, Vertical, 150cpm	-0.11 [-0.38- 0.39]	Hours	0.922	0.92 [ 0.86-0.96]	0.92 [ 0.86-0.95]	FALSE
6	Sedentary time	Standard, Zeros, 180min, Vertical, 100cpm	Standard, Zeros, 60min, Vertical, 150cpm	-0.11 [-0.49- 0.30]	Hours	0.945	0.94 [ 0.90-0.97]	0.94 [ 0.89-0.97]	FALSE
6	Sedentary time	LFE, Triano, 60min, Vertical, 100cpm	Standard, Triano, 30min, Vertical, 200cpm	-0.11 [-0.85- 0.63]	Hours	0.592	0.59 [ 0.35-0.76]	0.58 [ 0.34-0.74]	FALSE
6	Sedentary time	LFE, Triano, 180min, VM, 200cpm	Standard, Zeros, 60min, VM, 150cpm	-0.12 [-0.22- 0.22]	Hours	0.956	0.96 [ 0.92-0.98]	0.96 [ 0.92-0.98]	FALSE
6	Sedentary time	LFE, Choi, 180min, VM, 200cpm	Standard, Zeros, 90min, VM, 150cpm	-0.12 [-0.25- 0.16]	Hours	0.977	0.98 [ 0.96-0.99]	0.97 [ 0.95-0.99]	FALSE
6	Sedentary time	Standard, Choi, 180min, VM, 150cpm	Standard, Triano, 90min, VM, 200cpm	-0.12 [-0.31- 0.23]	Hours	0.962	0.96 [ 0.93-0.98]	0.96 [ 0.93-0.98]	FALSE
6	Sedentary time	Standard, Zeros, 30min, VM, 150cpm	Standard, Zeros, 90min, VM, 100cpm	-0.12 [-0.48- 0.11]	Hours	0.878	0.88 [ 0.78-0.93]	0.86 [ 0.76-0.92]	FALSE
6	Sedentary time	LFE, Zeros, 180min, VM, 150cpm	Standard, Zeros, 60min, VM, 150cpm	-0.12 [-0.51- 0.39]	Hours	0.917	0.92 [ 0.85-0.95]	0.92 [ 0.85-0.95]	FALSE
6	Sedentary time	Standard, Choi, 90min, VM, 100cpm	Standard, Zeros, 30min, VM, 150cpm	-0.13 [-0.27- 0.29]	Hours	0.885	0.89 [ 0.80-0.94]	0.88 [ 0.79-0.93]	FALSE
6	Sedentary time	LFE, Zeros, 90min, Vertical, 150cpm	Standard, Triano, 90min, Vertical, 150cpm	-0.13 [-0.45- 0.14]	Hours	0.960	0.96 [ 0.93-0.98]	0.96 [ 0.92-0.98]	FALSE
6	Sedentary time	LFE, Triano, 60min, VM, 150cpm	LFE, Zeros, 180min, VM, 100cpm	-0.13 [-0.57- 0.35]	Hours	0.899	0.90 [ 0.82-0.94]	0.89 [ 0.81-0.94]	FALSE
6	Sedentary time	LFE, Choi, 180min, VM, 200cpm	LFE, Triano, 30min, Vertical, 100cpm	-0.13 [-0.63- 0.63]	Hours	0.607	0.61 [ 0.37-0.77]	0.59 [ 0.37-0.75]	FALSE
6	Sedentary time	LFE, Triano, 90min, VM, 200cpm	Standard, Zeros, 30min, VM, 200cpm	-0.14 [-0.41- 0.26]	Hours	0.873	0.87 [ 0.78-0.93]	0.87 [ 0.77-0.93]	FALSE
6	Sedentary time	LFE, Triano, 180min, VM, 150cpm	LFE, Zeros, 30min, VM, 200cpm	-0.14 [-0.43- 0.14]	Hours	0.934	0.93 [ 0.88-0.96]	0.93 [ 0.88-0.96]	FALSE
6	Sedentary time	LFE, Triano, 180min, VM, 150cpm	LFE, Triano, 60min, VM, 200cpm	-0.14 [-0.43- 0.21]	Hours	0.946	0.95 [ 0.90-0.97]	0.94 [ 0.90-0.97]	FALSE
6	Sedentary time	LFE, Zeros, 180min, VM, 200cpm	Standard, Choi, 90min, VM, 200cpm	-0.14 [-0.47- 0.33]	Hours	0.925	0.93 [ 0.86-0.96]	0.92 [ 0.86-0.96]	FALSE
6	Sedentary time	LFE, Zeros, 180min, Vertical, 100cpm	Standard, Zeros, 60min, Vertical, 100cpm	-0.14 [-0.47- 0.36]	Hours	0.924	0.92 [ 0.86-0.96]	0.92 [ 0.85-0.95]	FALSE
6	Sedentary time	LFE, Triano, 180min, VM, 200cpm	LFE, Triano, 30min, Vertical, 100cpm	-0.14 [-0.73- 0.48]	Hours	0.577	0.58 [ 0.33-0.75]	0.56 [ 0.33-0.73]	FALSE
6	Sedentary time	LFE, Triano, 180min, Vertical, 150cpm	LFE, Zeros, 30min, Vertical, 200cpm	-0.15 [-0.32- 0.08]	Hours	0.941	0.94 [ 0.89-0.97]	0.94 [ 0.89-0.97]	FALSE
6	Sedentary time	LFE, Zeros, 180min, Vertical, 200cpm	Standard, Choi, 90min, Vertical, 200cpm	-0.15 [-0.38- 0.27]	Hours	0.941	0.94 [ 0.89-0.97]	0.93 [ 0.88-0.96]	FALSE
6	Sedentary time	LFE, Triano, 90min, VM, 200cpm	Standard, Triano, 60min, VM, 200cpm	-0.15 [-0.44- 0.39]	Hours	0.924	0.92 [ 0.86-0.96]	0.91 [ 0.84-0.95]	FALSE
6	Sedentary time	Standard, Triano, 30min, VM, 200cpm	Standard, Zeros, 30min, VM, 100cpm	-0.15 [-0.62- 0.41]	Hours	0.752	0.75 [ 0.58-0.86]	0.68 [ 0.51-0.80]	FALSE
6	Sedentary time	LFE, Choi, 180min, Vertical, 200cpm	Standard, Triano, 90min, Vertical, 200cpm	-0.16 [-0.42- 0.18]	Hours	0.950	0.95 [ 0.91-0.97]	0.95 [ 0.90-0.97]	FALSE
6	Sedentary time	LFE, Zeros, 60min, VM, 100cpm	Standard, Zeros, 30min, VM, 100cpm	-0.17 [-0.35- 0.34]	Hours	0.894	0.89 [ 0.81-0.94]	0.89 [ 0.80-0.94]	FALSE
6	Sedentary time	Standard, Triano, 90min, VM, 150cpm	Standard, Zeros, 30min, VM, 200cpm	-0.17 [-0.37- 0.21]	Hours	0.884	0.88 [ 0.79-0.94]	0.88 [ 0.79-0.94]	FALSE
6	Sedentary time	LFE, Triano, 90min, Vertical, 150cpm	Standard, Triano, 60min, Vertical, 150cpm	-0.17 [-0.41- 0.21]	Hours	0.909	0.91 [ 0.84-0.95]	0.91 [ 0.83-0.95]	FALSE
6	Sedentary time	LFE, Zeros, 180min, VM, 200cpm	Standard, Triano, 180min, VM, 200cpm	-0.17 [-0.42- 0.14]	Hours	0.944	0.94 [ 0.90-0.97]	0.94 [ 0.89-0.97]	FALSE
6	Sedentary time	LFE, Choi, 90min, VM, 100cpm	Standard, Zeros, 30min, VM, 100cpm	-0.17 [-0.44- 0.33]	Hours	0.874	0.87 [ 0.78-0.93]	0.86 [ 0.77-0.92]	FALSE
6	Sedentary time	LFE, Triano, 90min, Vertical, 100cpm	Standard, Zeros, 30min, Vertical, 100cpm	-0.17 [-0.46- 0.08]	Hours	0.879	0.88 [ 0.78-0.93]	0.88 [ 0.78-0.93]	FALSE
6	Sedentary time	LFE, Zeros, 60min, VM, 100cpm	Standard, Triano, 60min, VM, 100cpm	-0.17 [-0.50- 0.33]	Hours	0.937	0.94 [ 0.89-0.97]	0.92 [ 0.86-0.95]	FALSE
6	Sedentary time	LFE, Triano, 90min, VM, 150cpm	Standard, Zeros, 30min, VM, 150cpm	-0.17 [-0.51- 0.25]	Hours	0.872	0.87 [ 0.77-0.93]	0.87 [ 0.77-0.92]	FALSE
6	Sedentary time	LFE, Zeros, 180min, VM, 100cpm	Standard, Zeros, 60min, VM, 100cpm	-0.17 [-0.61- 0.33]	Hours	0.919	0.92 [ 0.85-0.96]	0.91 [ 0.85-0.95]	FALSE
6	Sedentary time	Standard, Triano, 60min, VM, 200cpm	Standard, Zeros, 180min, VM, 100cpm	-0.18 [-0.46- 0.61]	Hours	0.860	0.86 [ 0.75-0.92]	0.84 [ 0.73-0.91]	FALSE
6	Sedentary time	LFE, Zeros, 180min, VM, 150cpm	Standard, Choi, 90min, VM, 150cpm	-0.18 [-0.54- 0.24]	Hours	0.922	0.92 [ 0.86-0.96]	0.92 [ 0.85-0.96]	FALSE
6	Sedentary time	LFE, Choi, 90min, VM, 200cpm	LFE, Triano, 30min, Vertical, 100cpm	-0.18 [-0.81- 0.63]	Hours	0.601	0.60 [ 0.36-0.77]	0.58 [ 0.35-0.74]	FALSE
6	Sedentary time	LFE, Triano, 30min, VM, 200cpm	LFE, Zeros, 90min, VM, 100cpm	-0.18 [-0.83- 0.31]	Hours	0.726	0.73 [ 0.54-0.84]	0.67 [ 0.49-0.80]	FALSE
6	Sedentary time	LFE, Zeros, 180min, Vertical, 150cpm	Standard, Choi, 90min, Vertical, 150cpm	-0.19 [-0.41- 0.27]	Hours	0.943	0.94 [ 0.90-0.97]	0.93 [ 0.88-0.96]	FALSE
6	Sedentary time	LFE, Choi, 180min, Vertical, 100cpm	LFE, Zeros, 30min, Vertical, 150cpm	-0.19 [-0.42- 0.14]	Hours	0.939	0.94 [ 0.89-0.97]	0.94 [ 0.88-0.96]	FALSE
6	Sedentary time	LFE, Zeros, 90min, VM, 150cpm	Standard, Zeros, 30min, VM, 200cpm	-0.19 [-0.67- 0.22]	Hours	0.815	0.81 [ 0.68-0.90]	0.80 [ 0.67-0.89]	FALSE
6	Sedentary time	Standard, Triano, 180min, VM, 200cpm	Standard, Triano, 30min, Vertical, 150cpm	-0.19 [-0.75- 0.49]	Hours	0.380	0.38 [ 0.09-0.61]	0.36 [ 0.09-0.59]	FALSE
6	Sedentary time	LFE, Triano, 90min, VM, 200cpm	Standard, Triano, 30min, Vertical, 100cpm	-0.19 [-1.07- 0.48]	Hours	0.385	0.38 [ 0.09-0.62]	0.35 [ 0.09-0.57]	FALSE
6	Sedentary time	Standard, Triano, 30min, Vertical, 100cpm	Standard, Zeros, 180min, VM, 150cpm	-0.19 [-1.44- 0.23]	Hours	0.394	0.39 [ 0.10-0.62]	0.34 [ 0.09-0.56]	FALSE
6	Sedentary time	LFE, Zeros, 180min, Vertical, 100cpm	LFE, Zeros, 60min, Vertical, 150cpm	-0.20 [-0.49- 0.31]	Hours	0.936	0.94 [ 0.88-0.97]	0.93 [ 0.88-0.96]	FALSE
6	Sedentary time	LFE, Triano, 60min, Vertical, 150cpm	LFE, Zeros, 180min, Vertical, 100cpm	-0.20 [-0.70- 0.31]	Hours	0.894	0.89 [ 0.81-0.94]	0.88 [ 0.79-0.93]	FALSE
6	Sedentary time	LFE, Zeros, 30min, Vertical, 100cpm	Standard, Triano, 30min, Vertical, 200cpm	-0.20 [-0.84- 0.71]	Hours	0.635	0.64 [ 0.41-0.79]	0.61 [ 0.39-0.76]	FALSE
6	Sedentary time	LFE, Zeros, 180min, VM, 100cpm	Standard, Zeros, 30min, VM, 150cpm	-0.21 [-0.61- 0.36]	Hours	0.761	0.76 [ 0.59-0.86]	0.75 [ 0.59-0.86]	FALSE
6	Sedentary time	LFE, Zeros, 90min, VM, 150cpm	Standard, Triano, 60min, VM, 200cpm	-0.21 [-0.79- 0.32]	Hours	0.873	0.87 [ 0.77-0.93]	0.84 [ 0.74-0.91]	FALSE
6	Sedentary time	Standard, Zeros, 180min, VM, 100cpm	Standard, Zeros, 60min, VM, 150cpm	-0.22 [-0.56- 0.40]	Hours	0.932	0.93 [ 0.88-0.96]	0.93 [ 0.87-0.96]	FALSE
6	Sedentary time	LFE, Triano, 90min, Vertical, 100cpm	Standard, Triano, 60min, Vertical, 100cpm	-0.23 [-0.45- 0.16]	Hours	0.906	0.91 [ 0.83-0.95]	0.90 [ 0.82-0.94]	FALSE
6	Sedentary time	LFE, Triano, 90min, VM, 150cpm	Standard, Triano, 60min, VM, 150cpm	-0.24 [-0.50- 0.28]	Hours	0.927	0.93 [ 0.87-0.96]	0.90 [ 0.84-0.94]	FALSE
6	Sedentary time	LFE, Choi, 90min, VM, 100cpm	Standard, Triano, 60min, VM, 100cpm	-0.24 [-0.50- 0.34]	Hours	0.925	0.93 [ 0.86-0.96]	0.90 [ 0.84-0.94]	FALSE
6	Sedentary time	LFE, Triano, 30min, Vertical, 100cpm	Standard, Choi, 90min, VM, 200cpm	-0.24 [-0.94- 0.34]	Hours	0.690	0.69 [ 0.49-0.82]	0.65 [ 0.45-0.79]	FALSE
6	Sedentary time	LFE, Triano, 30min, Vertical, 100cpm	Standard, Zeros, 180min, VM, 150cpm	-0.24 [-0.98- 0.45]	Hours	0.588	0.59 [ 0.35-0.76]	0.55 [ 0.32-0.72]	FALSE
6	Sedentary time	Standard, Choi, 180min, VM, 200cpm	Standard, Triano, 30min, Vertical, 150cpm	-0.25 [-0.57- 0.72]	Hours	0.415	0.41 [ 0.13-0.64]	0.39 [ 0.12-0.61]	FALSE
6	Sedentary time	LFE, Choi, 180min, VM, 100cpm	LFE, Triano, 60min, VM, 150cpm	-0.26 [-0.48- 0.09]	Hours	0.938	0.94 [ 0.89-0.97]	0.93 [ 0.88-0.96]	FALSE
6	Sedentary time	Standard, Choi, 90min, VM, 200cpm	Standard, Triano, 30min, Vertical, 150cpm	-0.26 [-0.87- 0.46]	Hours	0.431	0.43 [ 0.15-0.65]	0.40 [ 0.14-0.61]	FALSE
6	Sedentary time	LFE, Zeros, 180min, Vertical, 100cpm	Standard, Choi, 90min, Vertical, 100cpm	-0.27 [-0.47- 0.31]	Hours	0.933	0.93 [ 0.88-0.96]	0.92 [ 0.86-0.96]	FALSE
6	Sedentary time	LFE, Zeros, 30min, VM, 100cpm	Standard, Triano, 30min, VM, 200cpm	-0.27 [-0.98- 0.73]	Hours	0.623	0.62 [ 0.39-0.78]	0.56 [ 0.35-0.71]	FALSE
6	Sedentary time	LFE, Zeros, 180min, VM, 150cpm	Standard, Triano, 30min, Vertical, 100cpm	-0.28 [-0.77- 0.96]	Hours	0.324	0.32 [ 0.02-0.57]	0.30 [ 0.02-0.53]	FALSE
6	Sedentary time	LFE, Triano, 90min, VM, 100cpm	Standard, Zeros, 30min, VM, 100cpm	-0.29 [-0.58- 0.13]	Hours	0.879	0.88 [ 0.78-0.93]	0.87 [ 0.77-0.92]	FALSE
6	Sedentary time	LFE, Zeros, 90min, Vertical, 150cpm	Standard, Triano, 60min, Vertical, 200cpm	-0.30 [-0.68- 0.29]	Hours	0.873	0.87 [ 0.77-0.93]	0.86 [ 0.76-0.92]	FALSE
6	Sedentary time	Standard, Triano, 30min, Vertical, 100cpm	Standard, Triano, 90min, VM, 200cpm	-0.30 [-0.84- 0.64]	Hours	0.469	0.47 [ 0.19-0.68]	0.44 [ 0.18-0.64]	FALSE
6	Sedentary time	LFE, Triano, 30min, Vertical, 100cpm	LFE, Zeros, 180min, VM, 200cpm	-0.32 [-0.92- 0.39]	Hours	0.552	0.55 [ 0.30-0.73]	0.53 [ 0.29-0.71]	FALSE
6	Sedentary time	LFE, Zeros, 180min, VM, 200cpm	Standard, Triano, 30min, Vertical, 150cpm	-0.39 [-0.89- 0.81]	Hours	0.328	0.33 [ 0.03-0.57]	0.31 [ 0.03-0.54]	FALSE
6	Sedentary time	LFE, Zeros, 90min, VM, 150cpm	Standard, Triano, 30min, Vertical, 100cpm	-0.40 [-1.31- 0.25]	Hours	0.329	0.33 [ 0.03-0.58]	0.29 [ 0.03-0.51]	FALSE
6	Sedentary time	LFE, Choi, 180min, VM, 150cpm	Standard, Triano, 30min, Vertical, 100cpm	-0.46 [-1.06- 0.38]	Hours	0.354	0.35 [ 0.06-0.59]	0.31 [ 0.05-0.53]	FALSE
6	Sedentary time	Standard, Choi, 180min, VM, 100cpm	Standard, Triano, 30min, Vertical, 100cpm	-0.53 [-1.16- 0.51]	Hours	0.365	0.37 [ 0.07-0.60]	0.32 [ 0.06-0.53]	FALSE
6	Sedentary time	LFE, Choi, 180min, Vertical, 100cpm	LFE, Choi, 90min, Vertical, 100cpm	0.00 [ 0.00- 0.17]	Hours	0.985	0.99 [ 0.97-0.99]	0.98 [ 0.96-0.99]	TRUE
6	Sedentary time	LFE, Choi, 180min, Vertical, 150cpm	LFE, Choi, 90min, Vertical, 150cpm	0.00 [ 0.00- 0.17]	Hours	0.986	0.99 [ 0.97-0.99]	0.98 [ 0.97-0.99]	TRUE
6	Sedentary time	LFE, Choi, 180min, Vertical, 200cpm	LFE, Choi, 90min, Vertical, 200cpm	0.00 [ 0.00- 0.17]	Hours	0.986	0.99 [ 0.97-0.99]	0.98 [ 0.97-0.99]	TRUE
6	Sedentary time	LFE, Choi, 180min, VM, 100cpm	LFE, Choi, 90min, VM, 100cpm	0.00 [ 0.00- 0.17]	Hours	0.984	0.98 [ 0.97-0.99]	0.98 [ 0.96-0.99]	TRUE
6	Sedentary time	LFE, Choi, 180min, VM, 150cpm	LFE, Choi, 90min, VM, 150cpm	0.00 [ 0.00- 0.17]	Hours	0.983	0.98 [ 0.97-0.99]	0.98 [ 0.96-0.99]	TRUE
6	Sedentary time	LFE, Choi, 180min, VM, 200cpm	LFE, Choi, 90min, VM, 200cpm	0.00 [ 0.00- 0.17]	Hours	0.983	0.98 [ 0.97-0.99]	0.98 [ 0.96-0.99]	TRUE
6	Sedentary time	Standard, Choi, 180min, Vertical, 100cpm	Standard, Choi, 90min, Vertical, 100cpm	0.00 [ 0.00- 0.24]	Hours	0.987	0.99 [ 0.98-0.99]	0.98 [ 0.97-0.99]	TRUE
6	Sedentary time	Standard, Choi, 180min, Vertical, 150cpm	Standard, Choi, 90min, Vertical, 150cpm	0.00 [ 0.00- 0.24]	Hours	0.988	0.99 [ 0.98-0.99]	0.98 [ 0.97-0.99]	TRUE
6	Sedentary time	Standard, Choi, 180min, Vertical, 200cpm	Standard, Choi, 90min, Vertical, 200cpm	0.00 [ 0.00- 0.24]	Hours	0.988	0.99 [ 0.98-0.99]	0.98 [ 0.97-0.99]	TRUE
6	Sedentary time	Standard, Choi, 180min, VM, 100cpm	Standard, Choi, 90min, VM, 100cpm	0.00 [ 0.00- 0.24]	Hours	0.984	0.98 [ 0.97-0.99]	0.98 [ 0.96-0.99]	TRUE
6	Sedentary time	Standard, Choi, 180min, VM, 150cpm	Standard, Choi, 90min, VM, 150cpm	0.00 [ 0.00- 0.24]	Hours	0.984	0.98 [ 0.97-0.99]	0.98 [ 0.96-0.99]	TRUE
6	Sedentary time	Standard, Choi, 180min, VM, 200cpm	Standard, Choi, 90min, VM, 200cpm	0.00 [ 0.00- 0.24]	Hours	0.984	0.98 [ 0.97-0.99]	0.98 [ 0.96-0.99]	TRUE
6	Sedentary time	LFE, Triano, 180min, Vertical, 100cpm	LFE, Triano, 90min, Vertical, 100cpm	0.00 [ 0.00- 0.31]	Hours	<0.001	0.98 [ 0.96-0.99]	0.97 [ 0.95-0.98]	TRUE
6	Sedentary time	LFE, Triano, 180min, Vertical, 150cpm	LFE, Triano, 90min, Vertical, 150cpm	0.00 [ 0.00- 0.31]	Hours	<0.001	0.98 [ 0.96-0.99]	0.97 [ 0.95-0.98]	TRUE
6	Sedentary time	LFE, Triano, 180min, Vertical, 200cpm	LFE, Triano, 90min, Vertical, 200cpm	0.00 [ 0.00- 0.31]	Hours	<0.001	0.98 [ 0.96-0.99]	0.97 [ 0.95-0.98]	TRUE
6	Sedentary time	LFE, Triano, 180min, VM, 100cpm	LFE, Triano, 90min, VM, 100cpm	0.00 [ 0.00- 0.31]	Hours	<0.001	0.98 [ 0.97-0.99]	0.98 [ 0.96-0.99]	TRUE
6	Sedentary time	LFE, Triano, 180min, VM, 150cpm	LFE, Triano, 90min, VM, 150cpm	0.00 [ 0.00- 0.31]	Hours	<0.001	0.98 [ 0.97-0.99]	0.98 [ 0.96-0.99]	TRUE
6	Sedentary time	LFE, Triano, 180min, VM, 200cpm	LFE, Triano, 90min, VM, 200cpm	0.00 [ 0.00- 0.31]	Hours	<0.001	0.98 [ 0.97-0.99]	0.97 [ 0.95-0.99]	TRUE
6	Sedentary time	LFE, Zeros, 180min, Vertical, 100cpm	LFE, Zeros, 90min, Vertical, 100cpm	0.00 [ 0.00- 0.48]	Hours	<0.001	0.96 [ 0.92-0.98]	0.94 [ 0.89-0.96]	TRUE
6	Sedentary time	LFE, Zeros, 180min, Vertical, 150cpm	LFE, Zeros, 90min, Vertical, 150cpm	0.00 [ 0.00- 0.48]	Hours	<0.001	0.96 [ 0.92-0.98]	0.94 [ 0.89-0.96]	TRUE
6	Sedentary time	LFE, Zeros, 180min, Vertical, 200cpm	LFE, Zeros, 90min, Vertical, 200cpm	0.00 [ 0.00- 0.48]	Hours	<0.001	0.96 [ 0.92-0.98]	0.94 [ 0.89-0.97]	TRUE
6	Sedentary time	LFE, Zeros, 180min, VM, 100cpm	LFE, Zeros, 90min, VM, 100cpm	0.00 [ 0.00- 0.48]	Hours	<0.001	0.96 [ 0.92-0.98]	0.94 [ 0.90-0.97]	TRUE
6	Sedentary time	LFE, Zeros, 180min, VM, 150cpm	LFE, Zeros, 90min, VM, 150cpm	0.00 [ 0.00- 0.48]	Hours	<0.001	0.96 [ 0.92-0.98]	0.94 [ 0.89-0.97]	TRUE
6	Sedentary time	LFE, Zeros, 180min, VM, 200cpm	LFE, Zeros, 90min, VM, 200cpm	0.00 [ 0.00- 0.48]	Hours	<0.001	0.95 [ 0.92-0.98]	0.94 [ 0.89-0.96]	TRUE
6	Sedentary time	Standard, Zeros, 180min, Vertical, 200cpm	Standard, Zeros, 90min, Vertical, 200cpm	0.00 [ 0.00- 0.48]	Hours	<0.001	0.97 [ 0.94-0.98]	0.95 [ 0.91-0.97]	TRUE
6	Sedentary time	Standard, Zeros, 180min, Vertical, 100cpm	Standard, Zeros, 90min, Vertical, 100cpm	0.00 [ 0.00- 0.49]	Hours	<0.001	0.96 [ 0.93-0.98]	0.95 [ 0.91-0.97]	TRUE
6	Sedentary time	Standard, Zeros, 180min, Vertical, 150cpm	Standard, Zeros, 90min, Vertical, 150cpm	0.00 [ 0.00- 0.49]	Hours	<0.001	0.97 [ 0.94-0.98]	0.95 [ 0.91-0.97]	TRUE
6	Sedentary time	Standard, Zeros, 180min, VM, 100cpm	Standard, Zeros, 90min, VM, 100cpm	0.00 [ 0.00- 0.52]	Hours	<0.001	0.96 [ 0.93-0.98]	0.94 [ 0.90-0.97]	TRUE
6	Sedentary time	Standard, Zeros, 180min, VM, 150cpm	Standard, Zeros, 90min, VM, 150cpm	0.00 [ 0.00- 0.52]	Hours	<0.001	0.96 [ 0.93-0.98]	0.94 [ 0.90-0.97]	TRUE
6	Sedentary time	Standard, Zeros, 180min, VM, 200cpm	Standard, Zeros, 90min, VM, 200cpm	0.00 [ 0.00- 0.52]	Hours	<0.001	0.96 [ 0.93-0.98]	0.94 [ 0.90-0.97]	TRUE
6	Sedentary time	LFE, Zeros, 180min, VM, 200cpm	Standard, Zeros, 90min, VM, 150cpm	0.01 [-0.09- 0.40]	Hours	0.946	0.95 [ 0.90-0.97]	0.94 [ 0.89-0.96]	TRUE
6	Sedentary time	LFE, Triano, 90min, VM, 150cpm	Standard, Triano, 90min, VM, 100cpm	0.02 [-0.05- 0.22]	Hours	0.991	0.99 [ 0.98-1.00]	0.99 [ 0.98-0.99]	TRUE
6	Sedentary time	Standard, Choi, 180min, VM, 100cpm	Standard, Triano, 180min, VM, 100cpm	0.03 [ 0.00- 0.16]	Hours	0.981	0.98 [ 0.97-0.99]	0.98 [ 0.96-0.99]	TRUE
6	Sedentary time	LFE, Zeros, 180min, Vertical, 200cpm	Standard, Zeros, 90min, Vertical, 150cpm	0.03 [-0.12- 0.49]	Hours	0.952	0.95 [ 0.91-0.97]	0.94 [ 0.89-0.96]	TRUE
6	Sedentary time	LFE, Choi, 180min, Vertical, 100cpm	LFE, Triano, 180min, Vertical, 100cpm	0.04 [ 0.00- 0.15]	Hours	0.983	0.98 [ 0.97-0.99]	0.98 [ 0.96-0.99]	TRUE
6	Sedentary time	LFE, Choi, 180min, Vertical, 150cpm	LFE, Triano, 180min, Vertical, 150cpm	0.04 [ 0.00- 0.15]	Hours	0.984	0.98 [ 0.97-0.99]	0.98 [ 0.97-0.99]	TRUE
6	Sedentary time	LFE, Choi, 180min, Vertical, 200cpm	LFE, Triano, 180min, Vertical, 200cpm	0.04 [ 0.00- 0.15]	Hours	0.984	0.98 [ 0.97-0.99]	0.98 [ 0.97-0.99]	TRUE
6	Sedentary time	LFE, Choi, 180min, VM, 100cpm	LFE, Triano, 180min, VM, 100cpm	0.04 [ 0.00- 0.15]	Hours	0.981	0.98 [ 0.96-0.99]	0.98 [ 0.96-0.99]	TRUE
6	Sedentary time	LFE, Choi, 180min, VM, 150cpm	LFE, Triano, 180min, VM, 150cpm	0.04 [ 0.00- 0.15]	Hours	0.981	0.98 [ 0.96-0.99]	0.98 [ 0.96-0.99]	TRUE
6	Sedentary time	LFE, Choi, 180min, VM, 200cpm	LFE, Triano, 180min, VM, 200cpm	0.04 [ 0.00- 0.15]	Hours	0.981	0.98 [ 0.96-0.99]	0.98 [ 0.96-0.99]	TRUE
6	Sedentary time	Standard, Choi, 180min, Vertical, 100cpm	Standard, Triano, 180min, Vertical, 100cpm	0.04 [ 0.00- 0.16]	Hours	0.986	0.99 [ 0.97-0.99]	0.98 [ 0.97-0.99]	TRUE
6	Sedentary time	Standard, Choi, 180min, Vertical, 150cpm	Standard, Triano, 180min, Vertical, 150cpm	0.04 [ 0.00- 0.16]	Hours	0.986	0.99 [ 0.97-0.99]	0.98 [ 0.97-0.99]	TRUE
6	Sedentary time	Standard, Choi, 180min, Vertical, 200cpm	Standard, Triano, 180min, Vertical, 200cpm	0.04 [ 0.00- 0.16]	Hours	0.986	0.99 [ 0.97-0.99]	0.98 [ 0.97-0.99]	TRUE
6	Sedentary time	Standard, Choi, 180min, VM, 150cpm	Standard, Triano, 180min, VM, 150cpm	0.04 [ 0.00- 0.16]	Hours	0.982	0.98 [ 0.97-0.99]	0.98 [ 0.96-0.99]	TRUE
6	Sedentary time	Standard, Choi, 180min, VM, 200cpm	Standard, Triano, 180min, VM, 200cpm	0.04 [ 0.00- 0.16]	Hours	0.982	0.98 [ 0.97-0.99]	0.98 [ 0.96-0.99]	TRUE
6	Sedentary time	LFE, Choi, 90min, VM, 200cpm	Standard, Triano, 90min, VM, 150cpm	0.04 [-0.06- 0.35]	Hours	0.977	0.98 [ 0.96-0.99]	0.97 [ 0.94-0.98]	TRUE
6	Sedentary time	LFE, Choi, 90min, Vertical, 100cpm	LFE, Triano, 90min, Vertical, 100cpm	0.05 [ 0.00- 0.22]	Hours	<0.001	0.99 [ 0.97-0.99]	0.98 [ 0.96-0.99]	TRUE
6	Sedentary time	LFE, Choi, 90min, Vertical, 150cpm	LFE, Triano, 90min, Vertical, 150cpm	0.05 [ 0.00- 0.22]	Hours	<0.001	0.99 [ 0.97-0.99]	0.98 [ 0.96-0.99]	TRUE
6	Sedentary time	LFE, Choi, 90min, Vertical, 200cpm	LFE, Triano, 90min, Vertical, 200cpm	0.05 [ 0.00- 0.22]	Hours	<0.001	0.99 [ 0.97-0.99]	0.98 [ 0.97-0.99]	TRUE
6	Sedentary time	LFE, Choi, 90min, VM, 100cpm	LFE, Triano, 90min, VM, 100cpm	0.05 [ 0.00- 0.22]	Hours	<0.001	0.99 [ 0.98-0.99]	0.98 [ 0.97-0.99]	TRUE
6	Sedentary time	LFE, Choi, 90min, VM, 150cpm	LFE, Triano, 90min, VM, 150cpm	0.05 [ 0.00- 0.22]	Hours	<0.001	0.99 [ 0.98-0.99]	0.98 [ 0.97-0.99]	TRUE
6	Sedentary time	LFE, Choi, 90min, VM, 200cpm	LFE, Triano, 90min, VM, 200cpm	0.05 [ 0.00- 0.22]	Hours	<0.001	0.99 [ 0.98-0.99]	0.98 [ 0.97-0.99]	TRUE
6	Sedentary time	LFE, Choi, 180min, VM, 150cpm	Standard, Choi, 90min, VM, 100cpm	0.05 [-0.07- 0.29]	Hours	0.981	0.98 [ 0.97-0.99]	0.98 [ 0.96-0.99]	TRUE
6	Sedentary time	LFE, Choi, 180min, VM, 150cpm	Standard, Triano, 180min, VM, 100cpm	0.07 [-0.01- 0.16]	Hours	0.981	0.98 [ 0.97-0.99]	0.98 [ 0.96-0.99]	TRUE
6	Sedentary time	LFE, Choi, 180min, Vertical, 150cpm	Standard, Triano, 180min, Vertical, 100cpm	0.07 [-0.02- 0.18]	Hours	0.981	0.98 [ 0.97-0.99]	0.98 [ 0.96-0.99]	TRUE
6	Sedentary time	LFE, Choi, 180min, Vertical, 150cpm	Standard, Choi, 90min, Vertical, 100cpm	0.07 [-0.04- 0.33]	Hours	0.982	0.98 [ 0.97-0.99]	0.97 [ 0.95-0.98]	TRUE
6	Sedentary time	LFE, Triano, 90min, Vertical, 150cpm	Standard, Triano, 90min, Vertical, 100cpm	0.08 [ 0.00- 0.24]	Hours	<0.001	0.99 [ 0.98-0.99]	0.98 [ 0.97-0.99]	TRUE
6	Sedentary time	LFE, Zeros, 90min, VM, 200cpm	Standard, Zeros, 60min, VM, 150cpm	0.08 [-0.09- 0.36]	Hours	0.971	0.97 [ 0.95-0.98]	0.97 [ 0.94-0.98]	TRUE
6	Sedentary time	LFE, Zeros, 180min, Vertical, 200cpm	Standard, Choi, 180min, Vertical, 150cpm	0.09 [-0.02- 0.42]	Hours	0.966	0.97 [ 0.94-0.98]	0.95 [ 0.91-0.97]	TRUE
6	Sedentary time	LFE, Choi, 180min, VM, 100cpm	LFE, Zeros, 60min, VM, 100cpm	0.10 [ 0.00- 0.25]	Hours	0.977	0.98 [ 0.96-0.99]	0.97 [ 0.94-0.98]	TRUE
6	Sedentary time	LFE, Choi, 180min, VM, 150cpm	LFE, Zeros, 60min, VM, 150cpm	0.10 [ 0.00- 0.25]	Hours	<0.001	0.98 [ 0.95-0.99]	0.97 [ 0.94-0.98]	TRUE
6	Sedentary time	LFE, Choi, 180min, VM, 200cpm	LFE, Zeros, 60min, VM, 200cpm	0.10 [ 0.00- 0.25]	Hours	<0.001	0.97 [ 0.95-0.99]	0.97 [ 0.94-0.98]	TRUE
6	Sedentary time	LFE, Triano, 60min, VM, 150cpm	Standard, Triano, 60min, VM, 100cpm	0.10 [ 0.00- 0.33]	Hours	<0.001	0.97 [ 0.94-0.98]	0.95 [ 0.91-0.97]	TRUE
6	Sedentary time	Standard, Choi, 90min, Vertical, 200cpm	Standard, Triano, 90min, Vertical, 200cpm	0.10 [ 0.02- 0.43]	Hours	<0.001	0.98 [ 0.97-0.99]	0.96 [ 0.94-0.98]	TRUE
6	Sedentary time	Standard, Choi, 90min, Vertical, 150cpm	Standard, Triano, 90min, Vertical, 150cpm	0.10 [ 0.02- 0.44]	Hours	<0.001	0.98 [ 0.97-0.99]	0.96 [ 0.94-0.98]	TRUE
6	Sedentary time	Standard, Choi, 90min, Vertical, 100cpm	Standard, Triano, 90min, Vertical, 100cpm	0.10 [ 0.02- 0.45]	Hours	<0.001	0.98 [ 0.96-0.99]	0.96 [ 0.94-0.98]	TRUE
6	Sedentary time	Standard, Choi, 90min, VM, 100cpm	Standard, Triano, 90min, VM, 100cpm	0.10 [ 0.02- 0.45]	Hours	<0.001	0.98 [ 0.97-0.99]	0.97 [ 0.94-0.98]	TRUE
6	Sedentary time	Standard, Choi, 90min, VM, 150cpm	Standard, Triano, 90min, VM, 150cpm	0.10 [ 0.02- 0.45]	Hours	<0.001	0.98 [ 0.96-0.99]	0.96 [ 0.94-0.98]	TRUE
6	Sedentary time	Standard, Choi, 90min, VM, 200cpm	Standard, Triano, 90min, VM, 200cpm	0.10 [ 0.02- 0.45]	Hours	<0.001	0.98 [ 0.96-0.99]	0.96 [ 0.93-0.98]	TRUE
6	Sedentary time	LFE, Choi, 180min, Vertical, 100cpm	LFE, Zeros, 60min, Vertical, 100cpm	0.10 [-0.01- 0.25]	Hours	0.977	0.98 [ 0.96-0.99]	0.97 [ 0.94-0.98]	TRUE
6	Sedentary time	LFE, Choi, 180min, Vertical, 150cpm	LFE, Zeros, 60min, Vertical, 150cpm	0.10 [-0.01- 0.25]	Hours	0.977	0.98 [ 0.96-0.99]	0.97 [ 0.94-0.98]	TRUE
6	Sedentary time	LFE, Choi, 180min, Vertical, 200cpm	LFE, Zeros, 60min, Vertical, 200cpm	0.10 [-0.01- 0.25]	Hours	0.977	0.98 [ 0.96-0.99]	0.97 [ 0.94-0.98]	TRUE
6	Sedentary time	LFE, Triano, 60min, Vertical, 200cpm	Standard, Triano, 60min, Vertical, 150cpm	0.10 [-0.04- 0.27]	Hours	0.952	0.95 [ 0.91-0.97]	0.94 [ 0.90-0.97]	TRUE
6	Sedentary time	Standard, Choi, 180min, Vertical, 200cpm	Standard, Zeros, 60min, Vertical, 200cpm	0.11 [ 0.00- 0.36]	Hours	<0.001	0.97 [ 0.95-0.98]	0.96 [ 0.93-0.98]	TRUE
6	Sedentary time	LFE, Choi, 90min, Vertical, 200cpm	Standard, Triano, 90min, Vertical, 150cpm	0.11 [-0.05- 0.34]	Hours	0.972	0.97 [ 0.95-0.98]	0.96 [ 0.93-0.98]	TRUE
6	Sedentary time	Standard, Choi, 180min, Vertical, 100cpm	Standard, Zeros, 60min, Vertical, 100cpm	0.12 [ 0.00- 0.36]	Hours	<0.001	0.97 [ 0.95-0.98]	0.96 [ 0.93-0.98]	TRUE
6	Sedentary time	Standard, Choi, 180min, Vertical, 150cpm	Standard, Zeros, 60min, Vertical, 150cpm	0.12 [ 0.00- 0.36]	Hours	<0.001	0.97 [ 0.95-0.98]	0.96 [ 0.93-0.98]	TRUE
6	Sedentary time	LFE, Choi, 180min, VM, 100cpm	LFE, Triano, 90min, VM, 100cpm	0.12 [ 0.01- 0.53]	Hours	<0.001	0.97 [ 0.94-0.98]	0.95 [ 0.91-0.97]	TRUE
6	Sedentary time	LFE, Choi, 180min, VM, 150cpm	LFE, Triano, 90min, VM, 150cpm	0.12 [ 0.01- 0.53]	Hours	<0.001	0.97 [ 0.94-0.98]	0.95 [ 0.91-0.97]	TRUE
6	Sedentary time	LFE, Choi, 180min, VM, 200cpm	LFE, Triano, 90min, VM, 200cpm	0.12 [ 0.01- 0.53]	Hours	<0.001	0.97 [ 0.94-0.98]	0.95 [ 0.91-0.97]	TRUE
6	Sedentary time	LFE, Choi, 180min, Vertical, 100cpm	LFE, Triano, 90min, Vertical, 100cpm	0.12 [ 0.01- 0.54]	Hours	<0.001	0.97 [ 0.94-0.98]	0.95 [ 0.91-0.97]	TRUE
6	Sedentary time	LFE, Choi, 180min, Vertical, 150cpm	LFE, Triano, 90min, Vertical, 150cpm	0.12 [ 0.01- 0.54]	Hours	<0.001	0.97 [ 0.94-0.98]	0.95 [ 0.91-0.97]	TRUE
6	Sedentary time	LFE, Choi, 180min, Vertical, 200cpm	LFE, Triano, 90min, Vertical, 200cpm	0.12 [ 0.01- 0.54]	Hours	<0.001	0.97 [ 0.94-0.98]	0.95 [ 0.91-0.97]	TRUE
6	Sedentary time	LFE, Zeros, 90min, Vertical, 150cpm	Standard, Choi, 90min, Vertical, 100cpm	0.12 [ 0.02- 0.37]	Hours	<0.001	0.98 [ 0.97-0.99]	0.97 [ 0.95-0.98]	TRUE
6	Sedentary time	LFE, Zeros, 30min, VM, 200cpm	Standard, Zeros, 30min, VM, 150cpm	0.12 [-0.04- 0.49]	Hours	0.962	0.96 [ 0.93-0.98]	0.95 [ 0.91-0.97]	TRUE
6	Sedentary time	LFE, Triano, 60min, Vertical, 200cpm	Standard, Choi, 90min, Vertical, 100cpm	0.12 [-0.05- 0.36]	Hours	0.962	0.96 [ 0.93-0.98]	0.95 [ 0.92-0.97]	TRUE
6	Sedentary time	LFE, Zeros, 60min, Vertical, 200cpm	Standard, Triano, 90min, Vertical, 150cpm	0.12 [-0.08- 0.28]	Hours	0.968	0.97 [ 0.94-0.98]	0.96 [ 0.93-0.98]	TRUE
6	Sedentary time	LFE, Zeros, 180min, VM, 200cpm	Standard, Choi, 180min, VM, 150cpm	0.12 [-0.08- 0.35]	Hours	0.964	0.96 [ 0.93-0.98]	0.95 [ 0.92-0.97]	TRUE
6	Sedentary time	LFE, Zeros, 90min, Vertical, 100cpm	Standard, Zeros, 30min, Vertical, 100cpm	0.12 [-0.09- 0.50]	Hours	0.864	0.86 [ 0.76-0.93]	0.85 [ 0.74-0.91]	TRUE
6	Sedentary time	LFE, Choi, 180min, Vertical, 150cpm	Standard, Zeros, 30min, Vertical, 150cpm	0.12 [-0.11- 0.50]	Hours	0.876	0.88 [ 0.78-0.93]	0.86 [ 0.75-0.92]	TRUE
6	Sedentary time	LFE, Zeros, 90min, Vertical, 150cpm	Standard, Triano, 60min, Vertical, 150cpm	0.12 [-0.25- 0.63]	Hours	0.892	0.89 [ 0.81-0.94]	0.87 [ 0.78-0.93]	TRUE
6	Sedentary time	Standard, Choi, 180min, VM, 100cpm	Standard, Zeros, 60min, VM, 100cpm	0.13 [ 0.00- 0.35]	Hours	<0.001	0.97 [ 0.94-0.98]	0.96 [ 0.93-0.98]	TRUE
6	Sedentary time	Standard, Choi, 180min, VM, 150cpm	Standard, Zeros, 60min, VM, 150cpm	0.13 [ 0.00- 0.35]	Hours	<0.001	0.97 [ 0.94-0.98]	0.96 [ 0.92-0.98]	TRUE
6	Sedentary time	Standard, Choi, 180min, VM, 200cpm	Standard, Zeros, 60min, VM, 200cpm	0.13 [ 0.00- 0.35]	Hours	<0.001	0.97 [ 0.94-0.98]	0.96 [ 0.92-0.98]	TRUE
6	Sedentary time	LFE, Zeros, 180min, VM, 150cpm	Standard, Zeros, 90min, VM, 100cpm	0.13 [ 0.01- 0.46]	Hours	<0.001	0.95 [ 0.91-0.97]	0.93 [ 0.88-0.96]	TRUE
6	Sedentary time	LFE, Zeros, 90min, VM, 150cpm	Standard, Choi, 90min, VM, 100cpm	0.13 [ 0.02- 0.33]	Hours	<0.001	0.98 [ 0.97-0.99]	0.98 [ 0.96-0.99]	TRUE
6	Sedentary time	LFE, Zeros, 90min, VM, 150cpm	Standard, Triano, 180min, VM, 100cpm	0.13 [-0.01- 0.33]	Hours	0.979	0.98 [ 0.96-0.99]	0.97 [ 0.95-0.99]	TRUE
6	Sedentary time	LFE, Zeros, 180min, Vertical, 150cpm	Standard, Zeros, 90min, Vertical, 100cpm	0.13 [-0.02- 0.56]	Hours	<0.001	0.95 [ 0.91-0.97]	0.92 [ 0.87-0.96]	TRUE
6	Sedentary time	LFE, Choi, 180min, Vertical, 150cpm	Standard, Zeros, 60min, Vertical, 100cpm	0.13 [-0.07- 0.41]	Hours	0.965	0.96 [ 0.93-0.98]	0.95 [ 0.91-0.97]	TRUE
6	Sedentary time	LFE, Zeros, 30min, Vertical, 200cpm	LFE, Zeros, 60min, Vertical, 150cpm	0.14 [ 0.00- 0.33]	Hours	<0.001	0.98 [ 0.96-0.99]	0.97 [ 0.95-0.98]	TRUE
6	Sedentary time	LFE, Zeros, 30min, Vertical, 200cpm	Standard, Choi, 90min, Vertical, 100cpm	0.14 [-0.03- 0.38]	Hours	0.969	0.97 [ 0.94-0.98]	0.96 [ 0.94-0.98]	TRUE
6	Sedentary time	LFE, Zeros, 90min, Vertical, 200cpm	Standard, Zeros, 60min, Vertical, 150cpm	0.14 [-0.09- 0.28]	Hours	0.974	0.97 [ 0.95-0.99]	0.97 [ 0.94-0.98]	TRUE
6	Sedentary time	LFE, Zeros, 180min, VM, 150cpm	LFE, Zeros, 30min, VM, 200cpm	0.14 [-0.11- 0.85]	Hours	0.892	0.89 [ 0.81-0.94]	0.87 [ 0.77-0.92]	TRUE
6	Sedentary time	Standard, Triano, 180min, VM, 150cpm	Standard, Zeros, 30min, VM, 200cpm	0.14 [-0.14- 0.61]	Hours	0.844	0.84 [ 0.73-0.91]	0.82 [ 0.70-0.90]	TRUE
6	Sedentary time	LFE, Zeros, 30min, Vertical, 200cpm	Standard, Zeros, 30min, Vertical, 150cpm	0.15 [ 0.00- 0.40]	Hours	<0.001	0.97 [ 0.94-0.98]	0.95 [ 0.92-0.97]	TRUE
6	Sedentary time	LFE, Choi, 90min, VM, 150cpm	Standard, Triano, 90min, VM, 100cpm	0.15 [ 0.01- 0.44]	Hours	<0.001	0.98 [ 0.96-0.99]	0.96 [ 0.93-0.98]	TRUE
6	Sedentary time	LFE, Zeros, 90min, Vertical, 150cpm	Standard, Triano, 180min, Vertical, 100cpm	0.15 [-0.07- 0.32]	Hours	0.974	0.97 [ 0.95-0.99]	0.97 [ 0.94-0.98]	TRUE
6	Sedentary time	LFE, Choi, 180min, VM, 150cpm	Standard, Zeros, 60min, VM, 100cpm	0.15 [-0.07- 0.39]	Hours	0.967	0.97 [ 0.94-0.98]	0.96 [ 0.92-0.98]	TRUE
6	Sedentary time	LFE, Triano, 60min, Vertical, 150cpm	Standard, Triano, 60min, Vertical, 100cpm	0.16 [ 0.01- 0.39]	Hours	<0.001	0.95 [ 0.92-0.98]	0.93 [ 0.88-0.96]	TRUE
6	Sedentary time	LFE, Zeros, 30min, VM, 150cpm	Standard, Triano, 60min, VM, 100cpm	0.16 [-0.10- 0.50]	Hours	0.954	0.95 [ 0.91-0.97]	0.93 [ 0.88-0.96]	TRUE
6	Sedentary time	LFE, Choi, 180min, Vertical, 200cpm	Standard, Zeros, 30min, Vertical, 200cpm	0.16 [-0.10- 0.63]	Hours	0.879	0.88 [ 0.78-0.93]	0.86 [ 0.75-0.92]	TRUE
6	Sedentary time	LFE, Triano, 60min, VM, 200cpm	Standard, Zeros, 30min, VM, 150cpm	0.16 [-0.14- 0.35]	Hours	0.928	0.93 [ 0.87-0.96]	0.92 [ 0.85-0.95]	TRUE
6	Sedentary time	LFE, Triano, 60min, Vertical, 200cpm	Standard, Zeros, 60min, Vertical, 100cpm	0.17 [ 0.04- 0.45]	Hours	0.967	0.97 [ 0.94-0.98]	0.95 [ 0.92-0.97]	TRUE
6	Sedentary time	LFE, Zeros, 30min, VM, 200cpm	LFE, Zeros, 60min, VM, 150cpm	0.17 [ 0.06- 0.29]	Hours	0.968	0.97 [ 0.94-0.98]	0.96 [ 0.93-0.98]	TRUE
6	Sedentary time	LFE, Zeros, 60min, VM, 150cpm	Standard, Triano, 90min, VM, 100cpm	0.17 [-0.01- 0.36]	Hours	0.972	0.97 [ 0.95-0.98]	0.96 [ 0.93-0.98]	TRUE
6	Sedentary time	LFE, Triano, 180min, Vertical, 200cpm	Standard, Triano, 90min, Vertical, 150cpm	0.17 [-0.02- 0.37]	Hours	<0.001	0.97 [ 0.94-0.98]	0.96 [ 0.92-0.98]	TRUE
6	Sedentary time	LFE, Triano, 60min, VM, 200cpm	LFE, Zeros, 60min, VM, 150cpm	0.17 [-0.07- 0.44]	Hours	0.960	0.96 [ 0.93-0.98]	0.95 [ 0.91-0.97]	TRUE
6	Sedentary time	LFE, Choi, 180min, VM, 200cpm	Standard, Zeros, 30min, VM, 200cpm	0.17 [-0.13- 0.58]	Hours	0.861	0.86 [ 0.75-0.92]	0.84 [ 0.72-0.91]	TRUE
6	Sedentary time	LFE, Triano, 60min, VM, 200cpm	Standard, Choi, 90min, VM, 100cpm	0.18 [-0.02- 0.40]	Hours	0.958	0.96 [ 0.92-0.98]	0.95 [ 0.91-0.97]	TRUE
6	Sedentary time	Standard, Choi, 180min, Vertical, 150cpm	Standard, Zeros, 30min, Vertical, 200cpm	0.18 [-0.04- 0.65]	Hours	0.888	0.89 [ 0.80-0.94]	0.86 [ 0.75-0.92]	TRUE
6	Sedentary time	Standard, Triano, 180min, Vertical, 150cpm	Standard, Triano, 60min, Vertical, 200cpm	0.18 [-0.17- 0.49]	Hours	0.898	0.90 [ 0.82-0.94]	0.88 [ 0.79-0.93]	TRUE
6	Sedentary time	Standard, Choi, 180min, VM, 200cpm	Standard, Zeros, 180min, VM, 150cpm	0.19 [ 0.00- 0.46]	Hours	0.969	0.97 [ 0.94-0.98]	0.96 [ 0.93-0.98]	TRUE
6	Sedentary time	LFE, Choi, 90min, Vertical, 150cpm	Standard, Triano, 90min, Vertical, 100cpm	0.19 [ 0.05- 0.46]	Hours	<0.001	0.97 [ 0.95-0.99]	0.95 [ 0.92-0.97]	TRUE
6	Sedentary time	LFE, Zeros, 30min, Vertical, 150cpm	Standard, Triano, 60min, Vertical, 100cpm	0.19 [-0.10- 0.49]	Hours	0.946	0.95 [ 0.90-0.97]	0.92 [ 0.86-0.95]	TRUE
6	Sedentary time	LFE, Zeros, 90min, VM, 150cpm	Standard, Zeros, 60min, VM, 100cpm	0.20 [ 0.02- 0.48]	Hours	<0.001	0.97 [ 0.95-0.99]	0.96 [ 0.93-0.98]	TRUE
6	Sedentary time	LFE, Zeros, 30min, Vertical, 200cpm	Standard, Zeros, 60min, Vertical, 100cpm	0.20 [ 0.04- 0.38]	Hours	<0.001	0.98 [ 0.96-0.99]	0.97 [ 0.95-0.98]	TRUE
6	Sedentary time	Standard, Zeros, 60min, Vertical, 200cpm	Standard, Zeros, 90min, Vertical, 150cpm	0.20 [ 0.05- 0.44]	Hours	<0.001	0.98 [ 0.97-0.99]	0.97 [ 0.95-0.98]	TRUE
6	Sedentary time	LFE, Triano, 90min, Vertical, 100cpm	LFE, Zeros, 30min, Vertical, 100cpm	0.20 [-0.01- 0.36]	Hours	<0.001	0.96 [ 0.93-0.98]	0.95 [ 0.91-0.97]	TRUE
6	Sedentary time	LFE, Triano, 90min, Vertical, 150cpm	LFE, Zeros, 30min, Vertical, 150cpm	0.20 [-0.01- 0.36]	Hours	<0.001	0.96 [ 0.93-0.98]	0.95 [ 0.91-0.97]	TRUE
6	Sedentary time	LFE, Triano, 90min, Vertical, 200cpm	LFE, Zeros, 30min, Vertical, 200cpm	0.20 [-0.01- 0.36]	Hours	<0.001	0.97 [ 0.94-0.98]	0.95 [ 0.91-0.97]	TRUE
6	Sedentary time	LFE, Zeros, 30min, VM, 200cpm	Standard, Choi, 90min, VM, 100cpm	0.20 [-0.03- 0.37]	Hours	0.963	0.96 [ 0.93-0.98]	0.96 [ 0.92-0.98]	TRUE
6	Sedentary time	LFE, Triano, 60min, Vertical, 200cpm	Standard, Zeros, 30min, Vertical, 150cpm	0.20 [-0.08- 0.34]	Hours	0.934	0.93 [ 0.88-0.96]	0.92 [ 0.86-0.95]	TRUE
6	Sedentary time	LFE, Zeros, 90min, VM, 150cpm	Standard, Zeros, 30min, VM, 150cpm	0.20 [-0.14- 0.61]	Hours	0.854	0.85 [ 0.74-0.92]	0.83 [ 0.72-0.90]	TRUE
6	Sedentary time	LFE, Choi, 180min, Vertical, 200cpm	Standard, Triano, 60min, Vertical, 200cpm	0.20 [-0.26- 0.61]	Hours	0.887	0.89 [ 0.80-0.94]	0.87 [ 0.78-0.93]	TRUE
6	Sedentary time	LFE, Zeros, 60min, Vertical, 150cpm	Standard, Triano, 90min, Vertical, 100cpm	0.21 [ 0.03- 0.39]	Hours	<0.001	0.97 [ 0.94-0.98]	0.96 [ 0.92-0.98]	TRUE
6	Sedentary time	LFE, Zeros, 180min, VM, 200cpm	Standard, Triano, 180min, VM, 150cpm	0.21 [-0.02- 0.55]	Hours	<0.001	0.95 [ 0.91-0.97]	0.93 [ 0.88-0.96]	TRUE
6	Sedentary time	Standard, Triano, 90min, Vertical, 150cpm	Standard, Zeros, 90min, Vertical, 100cpm	0.21 [-0.08- 0.46]	Hours	0.968	0.97 [ 0.94-0.98]	0.96 [ 0.92-0.98]	TRUE
6	Sedentary time	Standard, Triano, 180min, Vertical, 150cpm	Standard, Zeros, 30min, Vertical, 200cpm	0.21 [-0.08- 0.59]	Hours	0.873	0.87 [ 0.77-0.93]	0.85 [ 0.74-0.91]	TRUE
6	Sedentary time	Standard, Triano, 180min, VM, 150cpm	Standard, Triano, 60min, VM, 200cpm	0.21 [-0.17- 0.56]	Hours	0.897	0.90 [ 0.81-0.94]	0.87 [ 0.78-0.93]	TRUE
6	Sedentary time	LFE, Zeros, 90min, Vertical, 200cpm	Standard, Triano, 60min, Vertical, 200cpm	0.21 [-0.24- 0.65]	Hours	0.895	0.90 [ 0.81-0.94]	0.87 [ 0.78-0.93]	TRUE
6	Sedentary time	LFE, Zeros, 180min, Vertical, 200cpm	Standard, Triano, 180min, Vertical, 150cpm	0.22 [ 0.01- 0.52]	Hours	<0.001	0.95 [ 0.91-0.97]	0.93 [ 0.87-0.96]	TRUE
6	Sedentary time	Standard, Zeros, 30min, Vertical, 200cpm	Standard, Zeros, 90min, Vertical, 100cpm	0.22 [ 0.01- 0.55]	Hours	0.885	0.89 [ 0.80-0.94]	0.88 [ 0.79-0.93]	TRUE
6	Sedentary time	LFE, Triano, 90min, VM, 100cpm	LFE, Zeros, 30min, VM, 100cpm	0.22 [-0.01- 0.36]	Hours	<0.001	0.97 [ 0.94-0.98]	0.96 [ 0.92-0.98]	TRUE
6	Sedentary time	LFE, Triano, 90min, VM, 150cpm	LFE, Zeros, 30min, VM, 150cpm	0.22 [-0.01- 0.36]	Hours	<0.001	0.97 [ 0.94-0.98]	0.95 [ 0.92-0.97]	TRUE
6	Sedentary time	LFE, Triano, 90min, VM, 200cpm	LFE, Zeros, 30min, VM, 200cpm	0.22 [-0.01- 0.36]	Hours	<0.001	0.97 [ 0.94-0.98]	0.95 [ 0.91-0.97]	TRUE
6	Sedentary time	LFE, Zeros, 90min, Vertical, 150cpm	Standard, Zeros, 30min, Vertical, 150cpm	0.22 [-0.06- 0.39]	Hours	0.876	0.88 [ 0.78-0.93]	0.85 [ 0.75-0.92]	TRUE
6	Sedentary time	LFE, Triano, 60min, Vertical, 200cpm	LFE, Zeros, 60min, Vertical, 150cpm	0.22 [-0.07- 0.36]	Hours	0.964	0.96 [ 0.93-0.98]	0.96 [ 0.93-0.98]	TRUE
6	Sedentary time	LFE, Triano, 180min, VM, 200cpm	Standard, Triano, 90min, VM, 150cpm	0.22 [-0.07- 0.46]	Hours	0.973	0.97 [ 0.95-0.99]	0.96 [ 0.93-0.98]	TRUE
6	Sedentary time	LFE, Zeros, 180min, Vertical, 150cpm	LFE, Zeros, 30min, Vertical, 200cpm	0.22 [-0.11- 0.71]	Hours	0.912	0.91 [ 0.84-0.95]	0.88 [ 0.80-0.93]	TRUE
6	Sedentary time	LFE, Zeros, 90min, Vertical, 150cpm	Standard, Zeros, 60min, Vertical, 100cpm	0.23 [ 0.01- 0.43]	Hours	<0.001	0.97 [ 0.95-0.99]	0.95 [ 0.92-0.97]	TRUE
6	Sedentary time	LFE, Zeros, 30min, VM, 200cpm	Standard, Zeros, 60min, VM, 100cpm	0.23 [ 0.02- 0.34]	Hours	<0.001	0.97 [ 0.95-0.99]	0.96 [ 0.94-0.98]	TRUE
6	Sedentary time	Standard, Choi, 180min, Vertical, 200cpm	Standard, Zeros, 180min, Vertical, 150cpm	0.23 [ 0.02- 0.37]	Hours	0.974	0.97 [ 0.95-0.99]	0.97 [ 0.94-0.98]	TRUE
6	Sedentary time	LFE, Triano, 60min, VM, 200cpm	Standard, Zeros, 60min, VM, 100cpm	0.23 [ 0.02- 0.44]	Hours	0.964	0.96 [ 0.93-0.98]	0.95 [ 0.92-0.97]	TRUE
6	Sedentary time	LFE, Zeros, 30min, VM, 150cpm	Standard, Zeros, 30min, VM, 100cpm	0.23 [ 0.03- 0.51]	Hours	<0.001	0.96 [ 0.93-0.98]	0.94 [ 0.90-0.97]	TRUE
6	Sedentary time	LFE, Zeros, 180min, VM, 150cpm	Standard, Choi, 180min, VM, 100cpm	0.23 [ 0.05- 0.40]	Hours	<0.001	0.97 [ 0.94-0.98]	0.95 [ 0.91-0.97]	TRUE
6	Sedentary time	LFE, Zeros, 180min, Vertical, 150cpm	Standard, Choi, 180min, Vertical, 100cpm	0.23 [ 0.05- 0.50]	Hours	<0.001	0.97 [ 0.94-0.98]	0.94 [ 0.89-0.96]	TRUE
6	Sedentary time	LFE, Zeros, 90min, Vertical, 200cpm	Standard, Zeros, 30min, Vertical, 200cpm	0.23 [-0.02- 0.44]	Hours	0.881	0.88 [ 0.79-0.93]	0.85 [ 0.75-0.92]	TRUE
6	Sedentary time	LFE, Choi, 180min, VM, 200cpm	LFE, Zeros, 180min, VM, 150cpm	0.23 [-0.06- 0.46]	Hours	0.960	0.96 [ 0.93-0.98]	0.95 [ 0.91-0.97]	TRUE
6	Sedentary time	Standard, Choi, 90min, Vertical, 150cpm	Standard, Zeros, 180min, Vertical, 100cpm	0.23 [-0.07- 0.42]	Hours	0.956	0.96 [ 0.92-0.98]	0.95 [ 0.91-0.97]	TRUE
6	Sedentary time	Standard, Triano, 90min, VM, 150cpm	Standard, Zeros, 90min, VM, 100cpm	0.23 [-0.07- 0.51]	Hours	0.967	0.97 [ 0.94-0.98]	0.95 [ 0.92-0.97]	TRUE
6	Sedentary time	Standard, Choi, 180min, Vertical, 150cpm	Standard, Triano, 60min, Vertical, 200cpm	0.23 [-0.12- 0.72]	Hours	0.902	0.90 [ 0.82-0.95]	0.87 [ 0.78-0.93]	TRUE
6	Sedentary time	Standard, Choi, 90min, VM, 150cpm	Standard, Zeros, 180min, VM, 100cpm	0.23 [-0.28- 0.55]	Hours	0.940	0.94 [ 0.89-0.97]	0.93 [ 0.88-0.96]	TRUE
6	Sedentary time	Standard, Triano, 180min, VM, 100cpm	Standard, Triano, 90min, VM, 100cpm	0.24 [ 0.00- 0.54]	Hours	<0.001	0.98 [ 0.96-0.99]	0.96 [ 0.93-0.98]	TRUE
6	Sedentary time	LFE, Triano, 60min, Vertical, 150cpm	Standard, Zeros, 30min, Vertical, 100cpm	0.24 [ 0.03- 0.48]	Hours	<0.001	0.93 [ 0.88-0.96]	0.91 [ 0.84-0.95]	TRUE
6	Sedentary time	LFE, Choi, 180min, Vertical, 200cpm	Standard, Triano, 90min, Vertical, 150cpm	0.24 [ 0.03- 0.49]	Hours	<0.001	0.96 [ 0.92-0.98]	0.93 [ 0.88-0.96]	TRUE
6	Sedentary time	LFE, Zeros, 30min, Vertical, 150cpm	Standard, Zeros, 30min, Vertical, 100cpm	0.24 [ 0.07- 0.52]	Hours	<0.001	0.97 [ 0.94-0.98]	0.94 [ 0.90-0.97]	TRUE
6	Sedentary time	LFE, Choi, 90min, VM, 100cpm	LFE, Triano, 60min, VM, 100cpm	0.24 [ 0.10- 0.51]	Hours	<0.001	0.97 [ 0.94-0.98]	0.93 [ 0.88-0.96]	TRUE
6	Sedentary time	LFE, Choi, 90min, VM, 150cpm	LFE, Triano, 60min, VM, 150cpm	0.24 [ 0.10- 0.52]	Hours	<0.001	0.96 [ 0.93-0.98]	0.93 [ 0.87-0.96]	TRUE
6	Sedentary time	Standard, Zeros, 30min, VM, 200cpm	Standard, Zeros, 90min, VM, 100cpm	0.24 [-0.01- 0.64]	Hours	0.844	0.84 [ 0.73-0.91]	0.83 [ 0.71-0.90]	TRUE
6	Sedentary time	LFE, Triano, 60min, VM, 150cpm	Standard, Zeros, 30min, VM, 100cpm	0.24 [-0.06- 0.44]	Hours	0.933	0.93 [ 0.88-0.96]	0.91 [ 0.85-0.95]	TRUE
6	Sedentary time	Standard, Choi, 180min, VM, 150cpm	Standard, Triano, 60min, VM, 200cpm	0.24 [-0.11- 0.70]	Hours	0.907	0.91 [ 0.83-0.95]	0.86 [ 0.77-0.92]	TRUE
6	Sedentary time	LFE, Triano, 60min, Vertical, 200cpm	LFE, Zeros, 180min, Vertical, 100cpm	0.24 [-0.22- 0.79]	Hours	0.882	0.88 [ 0.79-0.94]	0.87 [ 0.77-0.92]	TRUE
6	Sedentary time	Standard, Triano, 180min, VM, 150cpm	Standard, Triano, 90min, VM, 150cpm	0.25 [ 0.00- 0.55]	Hours	<0.001	0.98 [ 0.95-0.99]	0.95 [ 0.92-0.97]	TRUE
6	Sedentary time	LFE, Triano, 180min, Vertical, 150cpm	Standard, Triano, 90min, Vertical, 100cpm	0.25 [ 0.07- 0.47]	Hours	<0.001	0.97 [ 0.94-0.98]	0.94 [ 0.90-0.97]	TRUE
6	Sedentary time	LFE, Choi, 90min, Vertical, 100cpm	LFE, Triano, 60min, Vertical, 100cpm	0.25 [ 0.10- 0.52]	Hours	<0.001	0.96 [ 0.92-0.98]	0.92 [ 0.86-0.95]	TRUE
6	Sedentary time	LFE, Choi, 90min, Vertical, 150cpm	LFE, Triano, 60min, Vertical, 150cpm	0.25 [ 0.10- 0.52]	Hours	<0.001	0.96 [ 0.92-0.98]	0.92 [ 0.86-0.95]	TRUE
6	Sedentary time	LFE, Choi, 90min, Vertical, 200cpm	LFE, Triano, 60min, Vertical, 200cpm	0.25 [ 0.10- 0.52]	Hours	<0.001	0.96 [ 0.93-0.98]	0.92 [ 0.86-0.95]	TRUE
6	Sedentary time	LFE, Choi, 90min, VM, 200cpm	LFE, Triano, 60min, VM, 200cpm	0.25 [ 0.10- 0.52]	Hours	<0.001	0.96 [ 0.93-0.98]	0.92 [ 0.87-0.95]	TRUE
6	Sedentary time	LFE, Zeros, 60min, Vertical, 200cpm	LFE, Zeros, 90min, Vertical, 150cpm	0.25 [ 0.11- 0.47]	Hours	<0.001	0.98 [ 0.97-0.99]	0.96 [ 0.94-0.98]	TRUE
6	Sedentary time	LFE, Triano, 180min, Vertical, 200cpm	Standard, Zeros, 180min, Vertical, 100cpm	0.25 [-0.01- 0.39]	Hours	0.956	0.96 [ 0.92-0.98]	0.95 [ 0.91-0.97]	TRUE
6	Sedentary time	LFE, Choi, 180min, Vertical, 200cpm	LFE, Zeros, 180min, Vertical, 150cpm	0.25 [-0.01- 0.42]	Hours	0.964	0.96 [ 0.93-0.98]	0.95 [ 0.92-0.97]	TRUE
6	Sedentary time	LFE, Choi, 180min, VM, 200cpm	Standard, Triano, 90min, VM, 150cpm	0.25 [-0.03- 0.60]	Hours	<0.001	0.96 [ 0.93-0.98]	0.94 [ 0.89-0.97]	TRUE
6	Sedentary time	LFE, Triano, 90min, VM, 200cpm	Standard, Triano, 60min, VM, 150cpm	0.25 [-0.03- 0.69]	Hours	<0.001	0.94 [ 0.89-0.97]	0.89 [ 0.82-0.93]	TRUE
6	Sedentary time	LFE, Zeros, 90min, VM, 200cpm	Standard, Zeros, 30min, VM, 200cpm	0.25 [-0.10- 0.61]	Hours	0.855	0.85 [ 0.74-0.92]	0.83 [ 0.71-0.90]	TRUE
6	Sedentary time	LFE, Triano, 90min, VM, 200cpm	LFE, Zeros, 90min, VM, 150cpm	0.25 [-0.14- 0.45]	Hours	0.970	0.97 [ 0.94-0.98]	0.96 [ 0.93-0.98]	TRUE
6	Sedentary time	LFE, Choi, 180min, VM, 200cpm	Standard, Triano, 60min, VM, 200cpm	0.25 [-0.17- 0.56]	Hours	0.901	0.90 [ 0.82-0.95]	0.87 [ 0.78-0.93]	TRUE
6	Sedentary time	LFE, Choi, 180min, Vertical, 100cpm	Standard, Triano, 30min, Vertical, 200cpm	0.25 [-0.20- 1.17]	Hours	0.546	0.55 [ 0.29-0.73]	0.49 [ 0.25-0.67]	TRUE
6	Sedentary time	LFE, Triano, 30min, Vertical, 100cpm	Standard, Triano, 60min, VM, 200cpm	0.25 [-0.21- 0.75]	Hours	0.756	0.76 [ 0.59-0.86]	0.74 [ 0.56-0.85]	TRUE
6	Sedentary time	Standard, Triano, 180min, Vertical, 100cpm	Standard, Triano, 90min, Vertical, 100cpm	0.26 [ 0.00- 0.55]	Hours	<0.001	0.97 [ 0.95-0.99]	0.95 [ 0.91-0.97]	TRUE
6	Sedentary time	Standard, Triano, 180min, Vertical, 150cpm	Standard, Triano, 90min, Vertical, 150cpm	0.26 [ 0.00- 0.55]	Hours	<0.001	0.97 [ 0.95-0.99]	0.95 [ 0.91-0.97]	TRUE
6	Sedentary time	Standard, Triano, 180min, Vertical, 200cpm	Standard, Triano, 90min, Vertical, 200cpm	0.26 [ 0.00- 0.55]	Hours	<0.001	0.97 [ 0.95-0.99]	0.95 [ 0.91-0.97]	TRUE
6	Sedentary time	Standard, Triano, 180min, VM, 200cpm	Standard, Triano, 90min, VM, 200cpm	0.26 [ 0.00- 0.55]	Hours	<0.001	0.97 [ 0.95-0.99]	0.95 [ 0.91-0.97]	TRUE
6	Sedentary time	LFE, Zeros, 90min, VM, 200cpm	Standard, Triano, 90min, VM, 150cpm	0.26 [ 0.00- 0.57]	Hours	<0.001	0.97 [ 0.95-0.98]	0.94 [ 0.90-0.97]	TRUE
6	Sedentary time	LFE, Triano, 90min, Vertical, 200cpm	Standard, Zeros, 90min, Vertical, 100cpm	0.26 [ 0.04- 0.39]	Hours	<0.001	0.98 [ 0.95-0.99]	0.96 [ 0.93-0.98]	TRUE
6	Sedentary time	Standard, Choi, 180min, VM, 100cpm	Standard, Triano, 90min, VM, 100cpm	0.26 [ 0.04- 0.69]	Hours	<0.001	0.96 [ 0.93-0.98]	0.93 [ 0.88-0.96]	TRUE
6	Sedentary time	LFE, Triano, 90min, Vertical, 200cpm	LFE, Zeros, 90min, Vertical, 150cpm	0.26 [-0.03- 0.39]	Hours	0.974	0.97 [ 0.95-0.99]	0.97 [ 0.94-0.98]	TRUE
6	Sedentary time	LFE, Zeros, 180min, VM, 200cpm	Standard, Choi, 90min, VM, 150cpm	0.27 [ 0.01- 0.64]	Hours	<0.001	0.94 [ 0.89-0.97]	0.91 [ 0.84-0.95]	TRUE
6	Sedentary time	Standard, Choi, 180min, VM, 150cpm	Standard, Triano, 90min, VM, 150cpm	0.27 [ 0.04- 0.70]	Hours	<0.001	0.96 [ 0.93-0.98]	0.92 [ 0.87-0.96]	TRUE
6	Sedentary time	Standard, Zeros, 180min, Vertical, 100cpm	Standard, Zeros, 30min, Vertical, 150cpm	0.27 [ 0.05- 0.84]	Hours	<0.001	0.86 [ 0.75-0.92]	0.80 [ 0.68-0.89]	TRUE
6	Sedentary time	LFE, Choi, 180min, Vertical, 200cpm	Standard, Zeros, 180min, Vertical, 100cpm	0.27 [ 0.07- 0.42]	Hours	<0.001	0.97 [ 0.94-0.98]	0.96 [ 0.92-0.98]	TRUE
6	Sedentary time	LFE, Zeros, 90min, Vertical, 200cpm	Standard, Triano, 90min, Vertical, 150cpm	0.27 [ 0.07- 0.55]	Hours	<0.001	0.97 [ 0.94-0.98]	0.94 [ 0.89-0.96]	TRUE
6	Sedentary time	LFE, Zeros, 30min, Vertical, 150cpm	LFE, Zeros, 60min, Vertical, 100cpm	0.27 [ 0.11- 0.46]	Hours	<0.001	0.97 [ 0.95-0.98]	0.95 [ 0.91-0.97]	TRUE
6	Sedentary time	Standard, Choi, 180min, VM, 150cpm	Standard, Zeros, 30min, VM, 200cpm	0.27 [-0.08- 0.70]	Hours	0.869	0.87 [ 0.77-0.93]	0.83 [ 0.72-0.90]	TRUE
6	Sedentary time	LFE, Zeros, 180min, Vertical, 200cpm	Standard, Choi, 90min, Vertical, 150cpm	0.28 [ 0.00- 0.67]	Hours	<0.001	0.95 [ 0.91-0.97]	0.91 [ 0.85-0.95]	TRUE
6	Sedentary time	LFE, Triano, 180min, VM, 150cpm	Standard, Triano, 90min, VM, 100cpm	0.28 [ 0.01- 0.52]	Hours	<0.001	0.98 [ 0.96-0.99]	0.96 [ 0.93-0.98]	TRUE
6	Sedentary time	LFE, Triano, 60min, Vertical, 200cpm	LFE, Triano, 90min, Vertical, 150cpm	0.28 [ 0.03- 0.42]	Hours	<0.001	0.97 [ 0.94-0.98]	0.96 [ 0.92-0.98]	TRUE
6	Sedentary time	Standard, Choi, 180min, VM, 200cpm	Standard, Triano, 90min, VM, 200cpm	0.28 [ 0.04- 0.70]	Hours	<0.001	0.96 [ 0.93-0.98]	0.92 [ 0.87-0.95]	TRUE
6	Sedentary time	LFE, Triano, 90min, VM, 200cpm	Standard, Choi, 180min, VM, 100cpm	0.28 [-0.04- 0.50]	Hours	0.957	0.96 [ 0.92-0.98]	0.95 [ 0.91-0.97]	TRUE
6	Sedentary time	Standard, Triano, 60min, Vertical, 200cpm	Standard, Zeros, 90min, Vertical, 100cpm	0.28 [-0.20- 0.78]	Hours	0.892	0.89 [ 0.81-0.94]	0.87 [ 0.78-0.93]	TRUE
6	Sedentary time	LFE, Triano, 90min, VM, 100cpm	Standard, Triano, 30min, VM, 150cpm	0.28 [-0.51- 1.25]	Hours	0.606	0.61 [ 0.37-0.77]	0.49 [ 0.29-0.65]	TRUE
6	Sedentary time	Standard, Triano, 180min, Vertical, 150cpm	Standard, Zeros, 180min, Vertical, 100cpm	0.29 [ 0.00- 0.49]	Hours	0.956	0.96 [ 0.92-0.98]	0.94 [ 0.90-0.97]	TRUE
6	Sedentary time	Standard, Zeros, 60min, VM, 200cpm	Standard, Zeros, 90min, VM, 150cpm	0.29 [ 0.05- 0.46]	Hours	<0.001	0.98 [ 0.96-0.99]	0.96 [ 0.94-0.98]	TRUE
6	Sedentary time	LFE, Triano, 180min, VM, 200cpm	Standard, Zeros, 180min, VM, 100cpm	0.29 [-0.10- 0.43]	Hours	0.945	0.94 [ 0.90-0.97]	0.94 [ 0.89-0.97]	TRUE
6	Sedentary time	Standard, Triano, 60min, VM, 200cpm	Standard, Zeros, 90min, VM, 100cpm	0.29 [-0.20- 0.74]	Hours	0.892	0.89 [ 0.81-0.94]	0.86 [ 0.76-0.92]	TRUE
6	Sedentary time	LFE, Zeros, 90min, VM, 200cpm	Standard, Triano, 60min, VM, 200cpm	0.29 [-0.21- 0.68]	Hours	0.901	0.90 [ 0.82-0.95]	0.87 [ 0.78-0.92]	TRUE
6	Sedentary time	LFE, Zeros, 30min, Vertical, 100cpm	Standard, Triano, 30min, Vertical, 150cpm	0.29 [-0.45- 1.12]	Hours	0.665	0.66 [ 0.45-0.81]	0.59 [ 0.39-0.74]	TRUE
6	Sedentary time	Standard, Triano, 90min, Vertical, 200cpm	Standard, Zeros, 60min, Vertical, 150cpm	0.30 [ 0.05- 0.47]	Hours	<0.001	0.97 [ 0.94-0.98]	0.95 [ 0.91-0.97]	TRUE
6	Sedentary time	LFE, Choi, 180min, Vertical, 150cpm	Standard, Triano, 90min, Vertical, 100cpm	0.30 [ 0.10- 0.60]	Hours	<0.001	0.96 [ 0.92-0.98]	0.92 [ 0.86-0.95]	TRUE
6	Sedentary time	Standard, Choi, 90min, VM, 200cpm	Standard, Zeros, 90min, VM, 150cpm	0.30 [ 0.12- 0.46]	Hours	<0.001	0.99 [ 0.98-0.99]	0.97 [ 0.95-0.98]	TRUE
6	Sedentary time	LFE, Triano, 60min, VM, 200cpm	LFE, Triano, 90min, VM, 150cpm	0.30 [ 0.13- 0.52]	Hours	<0.001	0.97 [ 0.94-0.98]	0.95 [ 0.91-0.97]	TRUE
6	Sedentary time	LFE, Choi, 90min, Vertical, 200cpm	LFE, Zeros, 30min, Vertical, 200cpm	0.30 [ 0.18- 0.47]	Hours	<0.001	0.97 [ 0.94-0.98]	0.93 [ 0.89-0.96]	TRUE
6	Sedentary time	LFE, Choi, 90min, Vertical, 100cpm	LFE, Zeros, 30min, Vertical, 100cpm	0.30 [ 0.18- 0.48]	Hours	<0.001	0.97 [ 0.94-0.98]	0.93 [ 0.88-0.96]	TRUE
6	Sedentary time	LFE, Choi, 90min, Vertical, 150cpm	LFE, Zeros, 30min, Vertical, 150cpm	0.30 [ 0.18- 0.48]	Hours	<0.001	0.97 [ 0.94-0.98]	0.93 [ 0.88-0.96]	TRUE
6	Sedentary time	LFE, Choi, 90min, VM, 100cpm	LFE, Zeros, 30min, VM, 100cpm	0.30 [ 0.18- 0.48]	Hours	<0.001	0.97 [ 0.95-0.99]	0.94 [ 0.90-0.96]	TRUE
6	Sedentary time	LFE, Choi, 90min, VM, 150cpm	LFE, Zeros, 30min, VM, 150cpm	0.30 [ 0.18- 0.48]	Hours	<0.001	0.97 [ 0.95-0.98]	0.94 [ 0.89-0.96]	TRUE
6	Sedentary time	LFE, Choi, 90min, VM, 200cpm	LFE, Zeros, 30min, VM, 200cpm	0.30 [ 0.18- 0.48]	Hours	<0.001	0.97 [ 0.94-0.98]	0.93 [ 0.89-0.96]	TRUE
6	Sedentary time	LFE, Triano, 180min, VM, 150cpm	LFE, Zeros, 180min, VM, 100cpm	0.30 [-0.03- 0.59]	Hours	0.940	0.94 [ 0.89-0.97]	0.92 [ 0.87-0.96]	TRUE
6	Sedentary time	LFE, Choi, 90min, Vertical, 150cpm	LFE, Zeros, 180min, Vertical, 100cpm	0.30 [-0.12- 0.48]	Hours	0.934	0.93 [ 0.88-0.96]	0.92 [ 0.86-0.96]	TRUE
6	Sedentary time	LFE, Triano, 90min, VM, 200cpm	Standard, Zeros, 90min, VM, 100cpm	0.31 [ 0.04- 0.43]	Hours	<0.001	0.97 [ 0.95-0.99]	0.96 [ 0.93-0.98]	TRUE
6	Sedentary time	LFE, Triano, 90min, Vertical, 200cpm	Standard, Triano, 60min, Vertical, 150cpm	0.31 [ 0.07- 0.65]	Hours	<0.001	0.93 [ 0.87-0.96]	0.88 [ 0.80-0.93]	TRUE
6	Sedentary time	LFE, Triano, 180min, Vertical, 200cpm	LFE, Zeros, 30min, Vertical, 200cpm	0.31 [ 0.15- 0.57]	Hours	<0.001	0.95 [ 0.91-0.97]	0.91 [ 0.84-0.95]	TRUE
6	Sedentary time	LFE, Triano, 180min, Vertical, 150cpm	LFE, Zeros, 30min, Vertical, 150cpm	0.31 [ 0.17- 0.57]	Hours	<0.001	0.95 [ 0.91-0.97]	0.91 [ 0.84-0.95]	TRUE
6	Sedentary time	LFE, Triano, 180min, Vertical, 100cpm	LFE, Zeros, 30min, Vertical, 100cpm	0.31 [ 0.17- 0.58]	Hours	<0.001	0.95 [ 0.91-0.97]	0.91 [ 0.84-0.95]	TRUE
6	Sedentary time	LFE, Triano, 180min, VM, 200cpm	LFE, Zeros, 30min, VM, 200cpm	0.31 [ 0.17- 0.59]	Hours	<0.001	0.95 [ 0.91-0.97]	0.91 [ 0.84-0.95]	TRUE
6	Sedentary time	LFE, Triano, 90min, Vertical, 200cpm	Standard, Choi, 180min, Vertical, 100cpm	0.31 [-0.03- 0.42]	Hours	<0.001	0.97 [ 0.94-0.98]	0.95 [ 0.92-0.97]	TRUE
6	Sedentary time	Standard, Choi, 180min, Vertical, 200cpm	Standard, Triano, 90min, Vertical, 200cpm	0.32 [ 0.04- 0.66]	Hours	<0.001	0.96 [ 0.93-0.98]	0.93 [ 0.88-0.96]	TRUE
6	Sedentary time	Standard, Choi, 180min, Vertical, 150cpm	Standard, Triano, 90min, Vertical, 150cpm	0.32 [ 0.04- 0.67]	Hours	<0.001	0.96 [ 0.93-0.98]	0.93 [ 0.88-0.96]	TRUE
6	Sedentary time	Standard, Choi, 180min, Vertical, 100cpm	Standard, Triano, 90min, Vertical, 100cpm	0.32 [ 0.04- 0.68]	Hours	<0.001	0.96 [ 0.93-0.98]	0.93 [ 0.87-0.96]	TRUE
6	Sedentary time	LFE, Triano, 90min, VM, 200cpm	Standard, Zeros, 30min, VM, 150cpm	0.32 [ 0.04- 0.73]	Hours	<0.001	0.90 [ 0.82-0.95]	0.85 [ 0.75-0.91]	TRUE
6	Sedentary time	LFE, Choi, 180min, VM, 150cpm	Standard, Triano, 90min, VM, 100cpm	0.32 [ 0.07- 0.64]	Hours	<0.001	0.96 [ 0.93-0.98]	0.93 [ 0.88-0.96]	TRUE
6	Sedentary time	LFE, Zeros, 180min, Vertical, 150cpm	Standard, Triano, 180min, Vertical, 100cpm	0.32 [ 0.09- 0.61]	Hours	<0.001	0.95 [ 0.92-0.98]	0.91 [ 0.85-0.95]	TRUE
6	Sedentary time	Standard, Choi, 90min, Vertical, 200cpm	Standard, Zeros, 90min, Vertical, 150cpm	0.32 [ 0.13- 0.43]	Hours	<0.001	0.99 [ 0.98-1.00]	0.97 [ 0.95-0.98]	TRUE
6	Sedentary time	LFE, Zeros, 60min, Vertical, 200cpm	Standard, Zeros, 90min, Vertical, 100cpm	0.32 [ 0.14- 0.43]	Hours	<0.001	0.98 [ 0.97-0.99]	0.96 [ 0.93-0.98]	TRUE
6	Sedentary time	LFE, Choi, 90min, Vertical, 200cpm	LFE, Zeros, 90min, Vertical, 150cpm	0.32 [ 0.16- 0.47]	Hours	<0.001	0.99 [ 0.98-0.99]	0.96 [ 0.94-0.98]	TRUE
6	Sedentary time	LFE, Triano, 180min, VM, 150cpm	LFE, Zeros, 30min, VM, 150cpm	0.32 [ 0.17- 0.59]	Hours	<0.001	0.95 [ 0.91-0.97]	0.91 [ 0.85-0.95]	TRUE
6	Sedentary time	LFE, Triano, 180min, Vertical, 200cpm	LFE, Zeros, 90min, Vertical, 150cpm	0.32 [ 0.19- 0.47]	Hours	<0.001	0.97 [ 0.95-0.99]	0.94 [ 0.90-0.97]	TRUE
6	Sedentary time	LFE, Zeros, 180min, VM, 100cpm	Standard, Zeros, 30min, VM, 100cpm	0.32 [-0.12- 0.79]	Hours	0.823	0.82 [ 0.69-0.90]	0.78 [ 0.63-0.87]	TRUE
6	Sedentary time	Standard, Triano, 60min, VM, 150cpm	Standard, Triano, 90min, VM, 100cpm	0.32 [-0.18- 0.51]	Hours	0.942	0.94 [ 0.89-0.97]	0.92 [ 0.87-0.96]	TRUE
6	Sedentary time	LFE, Choi, 180min, VM, 200cpm	Standard, Zeros, 180min, VM, 100cpm	0.33 [ 0.00- 0.46]	Hours	0.965	0.96 [ 0.93-0.98]	0.95 [ 0.92-0.97]	TRUE
6	Sedentary time	LFE, Triano, 90min, Vertical, 200cpm	Standard, Zeros, 30min, Vertical, 150cpm	0.33 [ 0.05- 0.63]	Hours	<0.001	0.90 [ 0.83-0.95]	0.85 [ 0.76-0.92]	TRUE
6	Sedentary time	LFE, Choi, 180min, Vertical, 150cpm	LFE, Zeros, 180min, Vertical, 100cpm	0.33 [ 0.06- 0.57]	Hours	<0.001	0.95 [ 0.92-0.98]	0.93 [ 0.88-0.96]	TRUE
6	Sedentary time	Standard, Triano, 90min, Vertical, 100cpm	Standard, Zeros, 30min, Vertical, 100cpm	0.33 [ 0.07- 0.57]	Hours	<0.001	0.92 [ 0.85-0.95]	0.87 [ 0.78-0.92]	TRUE
6	Sedentary time	Standard, Triano, 90min, Vertical, 150cpm	Standard, Zeros, 30min, Vertical, 150cpm	0.33 [ 0.07- 0.57]	Hours	<0.001	0.92 [ 0.85-0.96]	0.87 [ 0.78-0.93]	TRUE
6	Sedentary time	Standard, Triano, 90min, VM, 150cpm	Standard, Zeros, 30min, VM, 150cpm	0.33 [ 0.08- 0.56]	Hours	<0.001	0.91 [ 0.84-0.95]	0.86 [ 0.77-0.92]	TRUE
6	Sedentary time	Standard, Triano, 90min, VM, 200cpm	Standard, Zeros, 30min, VM, 200cpm	0.33 [ 0.08- 0.56]	Hours	<0.001	0.91 [ 0.83-0.95]	0.86 [ 0.76-0.92]	TRUE
6	Sedentary time	Standard, Triano, 90min, Vertical, 200cpm	Standard, Zeros, 30min, Vertical, 200cpm	0.33 [ 0.08- 0.57]	Hours	<0.001	0.92 [ 0.85-0.96]	0.87 [ 0.79-0.93]	TRUE
6	Sedentary time	Standard, Triano, 90min, VM, 100cpm	Standard, Zeros, 30min, VM, 100cpm	0.33 [ 0.10- 0.56]	Hours	<0.001	0.91 [ 0.84-0.95]	0.87 [ 0.77-0.92]	TRUE
6	Sedentary time	LFE, Triano, 180min, VM, 100cpm	LFE, Zeros, 30min, VM, 100cpm	0.33 [ 0.17- 0.59]	Hours	<0.001	0.96 [ 0.92-0.98]	0.92 [ 0.86-0.95]	TRUE
6	Sedentary time	LFE, Zeros, 90min, Vertical, 150cpm	Standard, Triano, 90min, Vertical, 100cpm	0.33 [ 0.17- 0.73]	Hours	<0.001	0.97 [ 0.94-0.98]	0.92 [ 0.86-0.95]	TRUE
6	Sedentary time	Standard, Triano, 180min, VM, 150cpm	Standard, Zeros, 180min, VM, 100cpm	0.33 [-0.01- 0.52]	Hours	0.952	0.95 [ 0.91-0.97]	0.94 [ 0.89-0.96]	TRUE
6	Sedentary time	LFE, Zeros, 60min, Vertical, 100cpm	Standard, Zeros, 180min, VM, 200cpm	0.33 [-0.04- 0.94]	Hours	0.835	0.83 [ 0.71-0.91]	0.79 [ 0.65-0.88]	TRUE
6	Sedentary time	LFE, Choi, 90min, VM, 150cpm	LFE, Zeros, 180min, VM, 100cpm	0.33 [-0.09- 0.63]	Hours	0.925	0.92 [ 0.86-0.96]	0.91 [ 0.85-0.95]	TRUE
6	Sedentary time	Standard, Triano, 90min, VM, 200cpm	Standard, Zeros, 60min, VM, 150cpm	0.34 [ 0.01- 0.42]	Hours	<0.001	0.97 [ 0.94-0.98]	0.95 [ 0.91-0.97]	TRUE
6	Sedentary time	LFE, Zeros, 60min, VM, 200cpm	LFE, Zeros, 90min, VM, 150cpm	0.34 [ 0.07- 0.49]	Hours	<0.001	0.98 [ 0.96-0.99]	0.96 [ 0.93-0.98]	TRUE
6	Sedentary time	LFE, Zeros, 180min, VM, 150cpm	Standard, Triano, 180min, VM, 100cpm	0.34 [ 0.10- 0.63]	Hours	<0.001	0.96 [ 0.92-0.98]	0.92 [ 0.87-0.95]	TRUE
6	Sedentary time	LFE, Zeros, 60min, VM, 200cpm	Standard, Triano, 60min, VM, 150cpm	0.34 [ 0.10- 0.73]	Hours	<0.001	0.95 [ 0.90-0.97]	0.88 [ 0.80-0.93]	TRUE
6	Sedentary time	LFE, Choi, 90min, VM, 200cpm	LFE, Zeros, 90min, VM, 150cpm	0.34 [ 0.14- 0.48]	Hours	<0.001	0.98 [ 0.97-0.99]	0.96 [ 0.93-0.98]	TRUE
6	Sedentary time	LFE, Zeros, 30min, VM, 150cpm	LFE, Zeros, 60min, VM, 100cpm	0.34 [ 0.14- 0.50]	Hours	<0.001	0.96 [ 0.94-0.98]	0.94 [ 0.89-0.97]	TRUE
6	Sedentary time	Standard, Zeros, 60min, Vertical, 150cpm	Standard, Zeros, 90min, Vertical, 100cpm	0.34 [ 0.14- 0.58]	Hours	<0.001	0.98 [ 0.96-0.99]	0.95 [ 0.91-0.97]	TRUE
6	Sedentary time	Standard, Triano, 180min, Vertical, 200cpm	Standard, Zeros, 90min, Vertical, 150cpm	0.34 [ 0.21- 0.46]	Hours	<0.001	0.98 [ 0.96-0.99]	0.95 [ 0.91-0.97]	TRUE
6	Sedentary time	LFE, Choi, 90min, VM, 200cpm	Standard, Zeros, 90min, VM, 100cpm	0.34 [ 0.21- 0.49]	Hours	<0.001	0.99 [ 0.98-0.99]	0.96 [ 0.93-0.98]	TRUE
6	Sedentary time	LFE, Zeros, 180min, VM, 200cpm	Standard, Zeros, 60min, VM, 150cpm	0.34 [-0.01- 0.78]	Hours	<0.001	0.94 [ 0.88-0.97]	0.90 [ 0.82-0.94]	TRUE
6	Sedentary time	Standard, Zeros, 180min, VM, 100cpm	Standard, Zeros, 30min, VM, 150cpm	0.34 [-0.05- 0.88]	Hours	<0.001	0.83 [ 0.70-0.91]	0.77 [ 0.63-0.87]	TRUE
6	Sedentary time	LFE, Triano, 90min, Vertical, 100cpm	Standard, Zeros, 180min, VM, 200cpm	0.34 [-0.13- 0.83]	Hours	0.839	0.84 [ 0.72-0.91]	0.81 [ 0.68-0.89]	TRUE
6	Sedentary time	LFE, Triano, 60min, Vertical, 100cpm	Standard, Triano, 30min, Vertical, 150cpm	0.34 [-0.42- 0.94]	Hours	0.630	0.63 [ 0.40-0.78]	0.58 [ 0.36-0.73]	TRUE
6	Sedentary time	LFE, Zeros, 180min, VM, 150cpm	Standard, Choi, 90min, VM, 100cpm	0.35 [ 0.10- 0.66]	Hours	<0.001	0.94 [ 0.90-0.97]	0.90 [ 0.83-0.94]	TRUE
6	Sedentary time	LFE, Triano, 90min, Vertical, 200cpm	Standard, Triano, 180min, Vertical, 100cpm	0.35 [ 0.12- 0.49]	Hours	<0.001	0.97 [ 0.95-0.99]	0.95 [ 0.91-0.97]	TRUE
6	Sedentary time	LFE, Choi, 180min, Vertical, 100cpm	LFE, Zeros, 30min, Vertical, 100cpm	0.35 [ 0.20- 0.79]	Hours	<0.001	0.95 [ 0.91-0.97]	0.89 [ 0.82-0.94]	TRUE
6	Sedentary time	LFE, Choi, 180min, Vertical, 150cpm	LFE, Zeros, 30min, Vertical, 150cpm	0.35 [ 0.20- 0.79]	Hours	<0.001	0.95 [ 0.91-0.98]	0.89 [ 0.82-0.94]	TRUE
6	Sedentary time	LFE, Choi, 180min, Vertical, 200cpm	LFE, Zeros, 30min, Vertical, 200cpm	0.35 [ 0.20- 0.79]	Hours	<0.001	0.96 [ 0.92-0.98]	0.90 [ 0.83-0.94]	TRUE
6	Sedentary time	LFE, Choi, 180min, VM, 100cpm	LFE, Zeros, 30min, VM, 100cpm	0.35 [ 0.20- 0.80]	Hours	<0.001	0.95 [ 0.91-0.97]	0.90 [ 0.83-0.94]	TRUE
6	Sedentary time	LFE, Choi, 180min, VM, 150cpm	LFE, Zeros, 30min, VM, 150cpm	0.35 [ 0.20- 0.81]	Hours	<0.001	0.95 [ 0.91-0.97]	0.89 [ 0.82-0.94]	TRUE
6	Sedentary time	LFE, Choi, 180min, VM, 200cpm	LFE, Zeros, 30min, VM, 200cpm	0.35 [ 0.20- 0.81]	Hours	<0.001	0.95 [ 0.91-0.97]	0.89 [ 0.81-0.93]	TRUE
6	Sedentary time	Standard, Triano, 180min, VM, 200cpm	Standard, Zeros, 90min, VM, 150cpm	0.35 [ 0.21- 0.47]	Hours	<0.001	0.98 [ 0.96-0.99]	0.95 [ 0.91-0.97]	TRUE
6	Sedentary time	LFE, Triano, 180min, Vertical, 200cpm	Standard, Zeros, 90min, Vertical, 100cpm	0.35 [ 0.24- 0.56]	Hours	<0.001	0.97 [ 0.95-0.99]	0.93 [ 0.89-0.96]	TRUE
6	Sedentary time	LFE, Triano, 180min, Vertical, 150cpm	LFE, Zeros, 180min, Vertical, 100cpm	0.35 [-0.02- 0.52]	Hours	0.941	0.94 [ 0.89-0.97]	0.93 [ 0.87-0.96]	TRUE
6	Sedentary time	Standard, Choi, 180min, VM, 200cpm	Standard, Triano, 30min, Vertical, 100cpm	0.35 [-0.03- 1.28]	Hours	0.454	0.45 [ 0.17-0.67]	0.38 [ 0.14-0.57]	TRUE
6	Sedentary time	Standard, Triano, 60min, Vertical, 150cpm	Standard, Triano, 90min, Vertical, 100cpm	0.35 [-0.09- 0.50]	Hours	0.937	0.94 [ 0.89-0.97]	0.93 [ 0.87-0.96]	TRUE
6	Sedentary time	Standard, Triano, 180min, VM, 200cpm	Standard, Triano, 30min, Vertical, 100cpm	0.35 [-0.21- 1.14]	Hours	0.418	0.42 [ 0.13-0.64]	0.36 [ 0.11-0.57]	TRUE
6	Sedentary time	Standard, Choi, 90min, VM, 200cpm	Standard, Triano, 30min, Vertical, 100cpm	0.35 [-0.24- 1.18]	Hours	0.469	0.47 [ 0.19-0.68]	0.41 [ 0.16-0.60]	TRUE
6	Sedentary time	LFE, Choi, 180min, VM, 100cpm	Standard, Triano, 30min, VM, 200cpm	0.35 [-0.45- 1.15]	Hours	0.575	0.58 [ 0.33-0.75]	0.48 [ 0.27-0.65]	TRUE
6	Sedentary time	LFE, Triano, 60min, Vertical, 150cpm	LFE, Zeros, 60min, Vertical, 100cpm	0.36 [ 0.00- 0.54]	Hours	<0.001	0.96 [ 0.92-0.98]	0.94 [ 0.89-0.97]	TRUE
6	Sedentary time	Standard, Zeros, 180min, Vertical, 200cpm	Standard, Zeros, 60min, Vertical, 200cpm	0.36 [ 0.00- 0.83]	Hours	<0.001	0.96 [ 0.92-0.98]	0.91 [ 0.84-0.95]	TRUE
6	Sedentary time	Standard, Choi, 180min, Vertical, 150cpm	Standard, Zeros, 180min, Vertical, 100cpm	0.36 [ 0.11- 0.55]	Hours	<0.001	0.97 [ 0.95-0.98]	0.95 [ 0.91-0.97]	TRUE
6	Sedentary time	LFE, Triano, 180min, VM, 200cpm	LFE, Zeros, 90min, VM, 150cpm	0.36 [ 0.16- 0.53]	Hours	<0.001	0.98 [ 0.95-0.99]	0.94 [ 0.90-0.97]	TRUE
6	Sedentary time	LFE, Zeros, 30min, VM, 200cpm	Standard, Triano, 90min, VM, 100cpm	0.36 [ 0.18- 0.64]	Hours	<0.001	0.95 [ 0.91-0.97]	0.92 [ 0.86-0.96]	TRUE
6	Sedentary time	LFE, Zeros, 180min, Vertical, 200cpm	Standard, Zeros, 60min, Vertical, 150cpm	0.36 [-0.02- 0.79]	Hours	<0.001	0.94 [ 0.90-0.97]	0.90 [ 0.82-0.94]	TRUE
6	Sedentary time	Standard, Triano, 60min, Vertical, 100cpm	Standard, Zeros, 180min, VM, 200cpm	0.36 [-0.19- 1.14]	Hours	0.712	0.71 [ 0.52-0.84]	0.66 [ 0.47-0.80]	TRUE
6	Sedentary time	LFE, Zeros, 30min, VM, 150cpm	Standard, Triano, 30min, VM, 200cpm	0.36 [-0.38- 1.41]	Hours	0.664	0.66 [ 0.45-0.81]	0.54 [ 0.35-0.69]	TRUE
6	Sedentary time	Standard, Zeros, 180min, Vertical, 150cpm	Standard, Zeros, 60min, Vertical, 150cpm	0.37 [ 0.00- 0.83]	Hours	<0.001	0.96 [ 0.92-0.98]	0.91 [ 0.84-0.94]	TRUE
6	Sedentary time	LFE, Triano, 90min, VM, 150cpm	Standard, Triano, 60min, VM, 100cpm	0.37 [ 0.03- 0.77]	Hours	<0.001	0.95 [ 0.90-0.97]	0.88 [ 0.81-0.93]	TRUE
6	Sedentary time	LFE, Zeros, 180min, Vertical, 150cpm	Standard, Choi, 90min, Vertical, 100cpm	0.37 [ 0.07- 0.80]	Hours	<0.001	0.95 [ 0.90-0.97]	0.89 [ 0.82-0.94]	TRUE
6	Sedentary time	LFE, Zeros, 90min, Vertical, 200cpm	Standard, Zeros, 180min, Vertical, 100cpm	0.37 [ 0.08- 0.46]	Hours	<0.001	0.95 [ 0.91-0.97]	0.93 [ 0.88-0.96]	TRUE
6	Sedentary time	LFE, Triano, 180min, VM, 100cpm	LFE, Triano, 60min, VM, 100cpm	0.37 [ 0.14- 0.60]	Hours	<0.001	0.97 [ 0.94-0.98]	0.92 [ 0.87-0.96]	TRUE
6	Sedentary time	LFE, Choi, 90min, Vertical, 200cpm	Standard, Zeros, 90min, Vertical, 100cpm	0.37 [ 0.15- 0.43]	Hours	<0.001	0.99 [ 0.98-0.99]	0.96 [ 0.93-0.97]	TRUE
6	Sedentary time	LFE, Triano, 180min, VM, 150cpm	LFE, Triano, 60min, VM, 150cpm	0.37 [ 0.15- 0.60]	Hours	<0.001	0.96 [ 0.93-0.98]	0.92 [ 0.86-0.95]	TRUE
6	Sedentary time	LFE, Triano, 180min, VM, 200cpm	LFE, Triano, 60min, VM, 200cpm	0.37 [ 0.15- 0.60]	Hours	<0.001	0.96 [ 0.92-0.98]	0.91 [ 0.85-0.95]	TRUE
6	Sedentary time	LFE, Triano, 90min, Vertical, 200cpm	Standard, Choi, 90min, Vertical, 100cpm	0.37 [ 0.26- 0.48]	Hours	<0.001	0.98 [ 0.97-0.99]	0.95 [ 0.92-0.97]	TRUE
6	Sedentary time	LFE, Zeros, 60min, VM, 100cpm	Standard, Triano, 30min, VM, 150cpm	0.37 [-0.36- 1.34]	Hours	0.621	0.62 [ 0.39-0.78]	0.49 [ 0.29-0.65]	TRUE
6	Sedentary time	LFE, Zeros, 180min, Vertical, 100cpm	LFE, Zeros, 60min, Vertical, 100cpm	0.38 [ 0.00- 0.79]	Hours	<0.001	0.95 [ 0.91-0.97]	0.89 [ 0.82-0.94]	TRUE
6	Sedentary time	LFE, Zeros, 180min, Vertical, 150cpm	LFE, Zeros, 60min, Vertical, 150cpm	0.38 [ 0.00- 0.79]	Hours	<0.001	0.95 [ 0.91-0.97]	0.89 [ 0.82-0.94]	TRUE
6	Sedentary time	LFE, Zeros, 180min, Vertical, 200cpm	LFE, Zeros, 60min, Vertical, 200cpm	0.38 [ 0.00- 0.79]	Hours	<0.001	0.95 [ 0.91-0.97]	0.90 [ 0.83-0.94]	TRUE
6	Sedentary time	LFE, Zeros, 180min, VM, 100cpm	LFE, Zeros, 60min, VM, 100cpm	0.38 [ 0.00- 0.83]	Hours	<0.001	0.95 [ 0.91-0.97]	0.90 [ 0.84-0.94]	TRUE
6	Sedentary time	LFE, Zeros, 180min, VM, 150cpm	LFE, Zeros, 60min, VM, 150cpm	0.38 [ 0.00- 0.83]	Hours	<0.001	0.95 [ 0.91-0.97]	0.90 [ 0.83-0.94]	TRUE
6	Sedentary time	LFE, Zeros, 180min, VM, 200cpm	LFE, Zeros, 60min, VM, 200cpm	0.38 [ 0.00- 0.83]	Hours	<0.001	0.95 [ 0.90-0.97]	0.89 [ 0.82-0.94]	TRUE
6	Sedentary time	Standard, Zeros, 180min, Vertical, 100cpm	Standard, Zeros, 60min, Vertical, 100cpm	0.38 [ 0.00- 0.83]	Hours	<0.001	0.95 [ 0.92-0.98]	0.90 [ 0.84-0.94]	TRUE
6	Sedentary time	Standard, Zeros, 180min, VM, 150cpm	Standard, Zeros, 60min, VM, 150cpm	0.38 [ 0.00- 0.84]	Hours	<0.001	0.95 [ 0.91-0.97]	0.90 [ 0.83-0.94]	TRUE
6	Sedentary time	Standard, Zeros, 180min, VM, 100cpm	Standard, Zeros, 60min, VM, 100cpm	0.38 [ 0.00- 0.86]	Hours	<0.001	0.95 [ 0.91-0.97]	0.90 [ 0.83-0.94]	TRUE
6	Sedentary time	Standard, Choi, 180min, VM, 150cpm	Standard, Zeros, 180min, VM, 100cpm	0.38 [ 0.04- 0.61]	Hours	<0.001	0.96 [ 0.93-0.98]	0.94 [ 0.90-0.97]	TRUE
6	Sedentary time	LFE, Triano, 180min, Vertical, 200cpm	LFE, Triano, 60min, Vertical, 200cpm	0.38 [ 0.08- 0.60]	Hours	<0.001	0.96 [ 0.92-0.98]	0.91 [ 0.85-0.95]	TRUE
6	Sedentary time	LFE, Triano, 180min, Vertical, 150cpm	LFE, Triano, 60min, Vertical, 150cpm	0.38 [ 0.09- 0.60]	Hours	<0.001	0.96 [ 0.92-0.98]	0.91 [ 0.84-0.94]	TRUE
6	Sedentary time	LFE, Triano, 180min, Vertical, 100cpm	LFE, Triano, 60min, Vertical, 100cpm	0.38 [ 0.10- 0.60]	Hours	<0.001	0.96 [ 0.92-0.98]	0.91 [ 0.84-0.95]	TRUE
6	Sedentary time	Standard, Zeros, 30min, Vertical, 200cpm	Standard, Zeros, 60min, Vertical, 100cpm	0.38 [ 0.11- 0.68]	Hours	<0.001	0.92 [ 0.85-0.95]	0.88 [ 0.80-0.93]	TRUE
6	Sedentary time	LFE, Zeros, 60min, Vertical, 200cpm	Standard, Triano, 60min, Vertical, 150cpm	0.38 [ 0.11- 0.77]	Hours	<0.001	0.94 [ 0.88-0.97]	0.87 [ 0.79-0.92]	TRUE
6	Sedentary time	LFE, Triano, 90min, VM, 200cpm	Standard, Triano, 180min, VM, 100cpm	0.38 [ 0.13- 0.51]	Hours	<0.001	0.97 [ 0.94-0.98]	0.95 [ 0.91-0.97]	TRUE
6	Sedentary time	LFE, Zeros, 90min, VM, 150cpm	Standard, Triano, 90min, VM, 100cpm	0.38 [ 0.13- 0.64]	Hours	<0.001	0.97 [ 0.95-0.99]	0.93 [ 0.89-0.96]	TRUE
6	Sedentary time	LFE, Triano, 60min, VM, 200cpm	Standard, Triano, 90min, VM, 100cpm	0.38 [ 0.14- 0.52]	Hours	<0.001	0.97 [ 0.94-0.98]	0.94 [ 0.89-0.97]	TRUE
6	Sedentary time	LFE, Zeros, 60min, Vertical, 200cpm	Standard, Choi, 180min, Vertical, 100cpm	0.38 [ 0.16- 0.47]	Hours	<0.001	0.97 [ 0.95-0.98]	0.95 [ 0.91-0.97]	TRUE
6	Sedentary time	LFE, Zeros, 60min, VM, 200cpm	Standard, Zeros, 90min, VM, 100cpm	0.38 [ 0.18- 0.45]	Hours	<0.001	0.98 [ 0.97-0.99]	0.96 [ 0.93-0.98]	TRUE
6	Sedentary time	LFE, Choi, 180min, Vertical, 200cpm	LFE, Zeros, 90min, Vertical, 150cpm	0.38 [ 0.18- 0.56]	Hours	<0.001	0.97 [ 0.95-0.99]	0.93 [ 0.88-0.96]	TRUE
6	Sedentary time	Standard, Choi, 90min, VM, 200cpm	Standard, Triano, 180min, VM, 150cpm	0.38 [ 0.19- 0.57]	Hours	<0.001	0.97 [ 0.95-0.98]	0.94 [ 0.89-0.96]	TRUE
6	Sedentary time	LFE, Choi, 90min, VM, 200cpm	Standard, Zeros, 30min, VM, 150cpm	0.38 [ 0.21- 0.85]	Hours	<0.001	0.89 [ 0.81-0.94]	0.81 [ 0.70-0.89]	TRUE
6	Sedentary time	LFE, Triano, 180min, Vertical, 200cpm	Standard, Choi, 180min, Vertical, 100cpm	0.38 [ 0.29- 0.51]	Hours	<0.001	0.98 [ 0.96-0.99]	0.94 [ 0.90-0.96]	TRUE
6	Sedentary time	LFE, Choi, 90min, Vertical, 200cpm	Standard, Choi, 180min, Vertical, 100cpm	0.38 [ 0.31- 0.45]	Hours	<0.001	0.98 [ 0.96-0.99]	0.95 [ 0.91-0.97]	TRUE
6	Sedentary time	Standard, Triano, 90min, Vertical, 200cpm	Standard, Zeros, 180min, Vertical, 100cpm	0.38 [-0.02- 0.69]	Hours	<0.001	0.92 [ 0.85-0.95]	0.88 [ 0.80-0.93]	TRUE
6	Sedentary time	LFE, Triano, 30min, Vertical, 100cpm	Standard, Zeros, 30min, VM, 200cpm	0.38 [-0.06- 0.76]	Hours	0.852	0.85 [ 0.74-0.92]	0.82 [ 0.69-0.89]	TRUE
6	Sedentary time	Standard, Zeros, 180min, VM, 200cpm	Standard, Zeros, 60min, VM, 200cpm	0.39 [ 0.00- 0.83]	Hours	<0.001	0.95 [ 0.91-0.97]	0.90 [ 0.82-0.94]	TRUE
6	Sedentary time	LFE, Choi, 90min, Vertical, 100cpm	Standard, Zeros, 180min, VM, 200cpm	0.39 [ 0.03- 0.94]	Hours	<0.001	0.86 [ 0.76-0.92]	0.80 [ 0.68-0.88]	TRUE
6	Sedentary time	LFE, Triano, 60min, VM, 150cpm	LFE, Zeros, 60min, VM, 100cpm	0.39 [ 0.05- 0.60]	Hours	<0.001	0.96 [ 0.93-0.98]	0.94 [ 0.89-0.96]	TRUE
6	Sedentary time	LFE, Choi, 90min, VM, 200cpm	Standard, Triano, 60min, VM, 150cpm	0.39 [ 0.10- 0.81]	Hours	<0.001	0.93 [ 0.88-0.96]	0.85 [ 0.76-0.91]	TRUE
6	Sedentary time	LFE, Zeros, 60min, VM, 200cpm	Standard, Choi, 180min, VM, 100cpm	0.39 [ 0.18- 0.50]	Hours	<0.001	0.97 [ 0.94-0.98]	0.94 [ 0.90-0.97]	TRUE
6	Sedentary time	LFE, Zeros, 60min, Vertical, 150cpm	LFE, Zeros, 90min, Vertical, 100cpm	0.39 [ 0.23- 0.58]	Hours	<0.001	0.98 [ 0.96-0.99]	0.94 [ 0.90-0.96]	TRUE
6	Sedentary time	Standard, Triano, 90min, VM, 200cpm	Standard, Zeros, 180min, VM, 100cpm	0.39 [-0.10- 0.89]	Hours	0.909	0.91 [ 0.84-0.95]	0.87 [ 0.79-0.93]	TRUE
6	Sedentary time	LFE, Triano, 90min, Vertical, 150cpm	LFE, Zeros, 90min, Vertical, 100cpm	0.40 [ 0.02- 0.54]	Hours	<0.001	0.97 [ 0.94-0.98]	0.95 [ 0.91-0.97]	TRUE
6	Sedentary time	LFE, Triano, 60min, Vertical, 200cpm	Standard, Triano, 90min, Vertical, 100cpm	0.40 [ 0.15- 0.54]	Hours	<0.001	0.97 [ 0.95-0.98]	0.94 [ 0.90-0.96]	TRUE
6	Sedentary time	Standard, Triano, 90min, Vertical, 150cpm	Standard, Zeros, 60min, Vertical, 100cpm	0.40 [ 0.15- 0.59]	Hours	<0.001	0.96 [ 0.93-0.98]	0.92 [ 0.87-0.96]	TRUE
6	Sedentary time	LFE, Zeros, 60min, VM, 200cpm	Standard, Zeros, 30min, VM, 150cpm	0.40 [ 0.18- 0.83]	Hours	<0.001	0.92 [ 0.85-0.95]	0.85 [ 0.75-0.91]	TRUE
6	Sedentary time	Standard, Choi, 90min, Vertical, 200cpm	Standard, Triano, 180min, Vertical, 150cpm	0.40 [ 0.19- 0.53]	Hours	<0.001	0.98 [ 0.96-0.99]	0.94 [ 0.90-0.97]	TRUE
6	Sedentary time	LFE, Choi, 180min, VM, 100cpm	LFE, Triano, 60min, VM, 100cpm	0.40 [ 0.19- 0.75]	Hours	<0.001	0.95 [ 0.91-0.97]	0.89 [ 0.82-0.94]	TRUE
6	Sedentary time	LFE, Zeros, 60min, VM, 150cpm	Standard, Triano, 60min, VM, 100cpm	0.40 [ 0.19- 0.82]	Hours	<0.001	0.95 [ 0.91-0.97]	0.86 [ 0.79-0.92]	TRUE
6	Sedentary time	LFE, Choi, 90min, Vertical, 200cpm	Standard, Zeros, 30min, Vertical, 150cpm	0.40 [ 0.24- 0.80]	Hours	<0.001	0.89 [ 0.81-0.94]	0.82 [ 0.71-0.89]	TRUE
6	Sedentary time	LFE, Triano, 90min, Vertical, 200cpm	LFE, Zeros, 60min, Vertical, 150cpm	0.40 [ 0.25- 0.51]	Hours	<0.001	0.97 [ 0.95-0.99]	0.94 [ 0.90-0.96]	TRUE
6	Sedentary time	LFE, Choi, 90min, VM, 200cpm	Standard, Choi, 180min, VM, 100cpm	0.40 [ 0.26- 0.51]	Hours	<0.001	0.97 [ 0.95-0.99]	0.95 [ 0.91-0.97]	TRUE
6	Sedentary time	LFE, Choi, 90min, Vertical, 150cpm	LFE, Zeros, 90min, Vertical, 100cpm	0.40 [ 0.29- 0.57]	Hours	<0.001	0.98 [ 0.97-0.99]	0.94 [ 0.90-0.96]	TRUE
6	Sedentary time	LFE, Zeros, 90min, VM, 200cpm	Standard, Zeros, 180min, VM, 100cpm	0.40 [-0.04- 0.51]	Hours	<0.001	0.94 [ 0.89-0.97]	0.93 [ 0.87-0.96]	TRUE
6	Sedentary time	LFE, Triano, 60min, VM, 200cpm	LFE, Zeros, 180min, VM, 100cpm	0.40 [-0.21- 0.82]	Hours	0.867	0.87 [ 0.77-0.93]	0.84 [ 0.73-0.91]	TRUE
6	Sedentary time	LFE, Choi, 90min, Vertical, 100cpm	LFE, Triano, 30min, Vertical, 150cpm	0.41 [ 0.07- 1.24]	Hours	<0.001	0.77 [ 0.61-0.87]	0.67 [ 0.49-0.79]	TRUE
6	Sedentary time	LFE, Triano, 90min, Vertical, 150cpm	Standard, Triano, 60min, Vertical, 100cpm	0.41 [ 0.10- 0.71]	Hours	<0.001	0.93 [ 0.87-0.96]	0.86 [ 0.77-0.91]	TRUE
6	Sedentary time	LFE, Triano, 60min, Vertical, 150cpm	LFE, Triano, 90min, Vertical, 100cpm	0.41 [ 0.13- 0.62]	Hours	<0.001	0.97 [ 0.94-0.98]	0.93 [ 0.88-0.96]	TRUE
6	Sedentary time	LFE, Zeros, 30min, Vertical, 200cpm	Standard, Triano, 90min, Vertical, 100cpm	0.41 [ 0.13- 0.64]	Hours	<0.001	0.96 [ 0.92-0.98]	0.92 [ 0.87-0.96]	TRUE
6	Sedentary time	LFE, Choi, 180min, VM, 150cpm	LFE, Triano, 60min, VM, 150cpm	0.41 [ 0.19- 0.77]	Hours	<0.001	0.95 [ 0.91-0.97]	0.88 [ 0.81-0.93]	TRUE
6	Sedentary time	LFE, Choi, 180min, VM, 200cpm	LFE, Triano, 60min, VM, 200cpm	0.41 [ 0.19- 0.77]	Hours	<0.001	0.95 [ 0.90-0.97]	0.88 [ 0.80-0.93]	TRUE
6	Sedentary time	Standard, Choi, 180min, Vertical, 200cpm	Standard, Zeros, 90min, Vertical, 150cpm	0.41 [ 0.20- 0.57]	Hours	<0.001	0.98 [ 0.96-0.99]	0.94 [ 0.90-0.96]	TRUE
6	Sedentary time	LFE, Zeros, 60min, Vertical, 200cpm	Standard, Choi, 90min, Vertical, 100cpm	0.41 [ 0.24- 0.58]	Hours	<0.001	0.98 [ 0.97-0.99]	0.94 [ 0.90-0.96]	TRUE
6	Sedentary time	LFE, Choi, 180min, Vertical, 200cpm	Standard, Zeros, 90min, Vertical, 100cpm	0.41 [ 0.25- 0.65]	Hours	<0.001	0.97 [ 0.95-0.99]	0.92 [ 0.86-0.95]	TRUE
6	Sedentary time	Standard, Choi, 90min, Vertical, 150cpm	Standard, Zeros, 90min, Vertical, 100cpm	0.41 [ 0.26- 0.59]	Hours	<0.001	0.99 [ 0.98-0.99]	0.95 [ 0.92-0.97]	TRUE
6	Sedentary time	LFE, Triano, 30min, VM, 200cpm	LFE, Triano, 60min, VM, 100cpm	0.41 [-0.36- 0.80]	Hours	0.812	0.81 [ 0.67-0.90]	0.77 [ 0.63-0.86]	TRUE
6	Sedentary time	LFE, Zeros, 180min, Vertical, 150cpm	Standard, Zeros, 60min, Vertical, 100cpm	0.42 [ 0.07- 0.87]	Hours	<0.001	0.94 [ 0.90-0.97]	0.87 [ 0.79-0.92]	TRUE
6	Sedentary time	LFE, Choi, 180min, VM, 150cpm	LFE, Zeros, 180min, VM, 100cpm	0.42 [ 0.11- 0.66]	Hours	<0.001	0.96 [ 0.92-0.98]	0.93 [ 0.87-0.96]	TRUE
6	Sedentary time	LFE, Triano, 30min, Vertical, 200cpm	Standard, Triano, 30min, Vertical, 150cpm	0.42 [ 0.14- 0.88]	Hours	<0.001	0.87 [ 0.76-0.93]	0.74 [ 0.60-0.84]	TRUE
6	Sedentary time	LFE, Choi, 180min, VM, 200cpm	LFE, Zeros, 90min, VM, 150cpm	0.42 [ 0.19- 0.68]	Hours	<0.001	0.97 [ 0.94-0.98]	0.92 [ 0.87-0.95]	TRUE
6	Sedentary time	LFE, Choi, 180min, Vertical, 200cpm	LFE, Triano, 60min, Vertical, 200cpm	0.42 [ 0.20- 0.68]	Hours	<0.001	0.95 [ 0.90-0.97]	0.88 [ 0.80-0.93]	TRUE
6	Sedentary time	LFE, Choi, 180min, Vertical, 150cpm	LFE, Triano, 60min, Vertical, 150cpm	0.42 [ 0.20- 0.69]	Hours	<0.001	0.95 [ 0.90-0.97]	0.88 [ 0.80-0.93]	TRUE
6	Sedentary time	LFE, Choi, 180min, Vertical, 100cpm	LFE, Triano, 60min, Vertical, 100cpm	0.42 [ 0.20- 0.73]	Hours	<0.001	0.95 [ 0.90-0.97]	0.88 [ 0.80-0.93]	TRUE
6	Sedentary time	LFE, Triano, 90min, VM, 200cpm	LFE, Zeros, 60min, VM, 150cpm	0.42 [ 0.22- 0.54]	Hours	<0.001	0.97 [ 0.95-0.98]	0.93 [ 0.89-0.96]	TRUE
6	Sedentary time	LFE, Triano, 90min, Vertical, 200cpm	Standard, Zeros, 60min, Vertical, 100cpm	0.42 [ 0.22- 0.58]	Hours	<0.001	0.97 [ 0.94-0.98]	0.92 [ 0.87-0.95]	TRUE
6	Sedentary time	Standard, Choi, 90min, VM, 150cpm	Standard, Zeros, 90min, VM, 100cpm	0.42 [ 0.23- 0.61]	Hours	<0.001	0.98 [ 0.97-0.99]	0.94 [ 0.90-0.96]	TRUE
6	Sedentary time	LFE, Triano, 180min, VM, 200cpm	Standard, Zeros, 90min, VM, 100cpm	0.42 [ 0.25- 0.49]	Hours	<0.001	0.98 [ 0.96-0.99]	0.94 [ 0.90-0.96]	TRUE
6	Sedentary time	LFE, Choi, 90min, Vertical, 200cpm	Standard, Triano, 180min, Vertical, 100cpm	0.42 [ 0.30- 0.61]	Hours	<0.001	0.98 [ 0.96-0.99]	0.93 [ 0.88-0.96]	TRUE
6	Sedentary time	LFE, Choi, 180min, Vertical, 200cpm	Standard, Choi, 180min, Vertical, 100cpm	0.42 [ 0.36- 0.54]	Hours	<0.001	0.99 [ 0.99-1.00]	0.93 [ 0.90-0.96]	TRUE
6	Sedentary time	LFE, Zeros, 30min, Vertical, 100cpm	Standard, Choi, 180min, VM, 200cpm	0.42 [-0.02- 0.91]	Hours	0.829	0.83 [ 0.70-0.90]	0.79 [ 0.65-0.88]	TRUE
6	Sedentary time	LFE, Triano, 60min, Vertical, 100cpm	Standard, Zeros, 90min, VM, 200cpm	0.42 [-0.09- 0.88]	Hours	0.851	0.85 [ 0.74-0.92]	0.81 [ 0.69-0.89]	TRUE
6	Sedentary time	LFE, Zeros, 90min, Vertical, 100cpm	Standard, Triano, 30min, Vertical, 200cpm	0.42 [-0.33- 1.40]	Hours	0.532	0.53 [ 0.27-0.72]	0.47 [ 0.23-0.65]	TRUE
6	Sedentary time	LFE, Triano, 90min, VM, 150cpm	Standard, Zeros, 30min, VM, 100cpm	0.43 [ 0.11- 0.81]	Hours	<0.001	0.91 [ 0.83-0.95]	0.84 [ 0.74-0.90]	TRUE
6	Sedentary time	LFE, Zeros, 180min, Vertical, 150cpm	Standard, Zeros, 30min, Vertical, 150cpm	0.43 [ 0.12- 0.87]	Hours	<0.001	0.84 [ 0.73-0.91]	0.77 [ 0.63-0.86]	TRUE
6	Sedentary time	LFE, Triano, 90min, VM, 200cpm	Standard, Choi, 90min, VM, 100cpm	0.43 [ 0.19- 0.52]	Hours	<0.001	0.98 [ 0.97-0.99]	0.95 [ 0.92-0.97]	TRUE
6	Sedentary time	LFE, Choi, 90min, VM, 150cpm	Standard, Triano, 60min, VM, 100cpm	0.43 [ 0.19- 0.88]	Hours	<0.001	0.94 [ 0.89-0.97]	0.84 [ 0.74-0.90]	TRUE
6	Sedentary time	Standard, Choi, 90min, VM, 150cpm	Standard, Triano, 60min, VM, 150cpm	0.43 [ 0.19- 0.95]	Hours	<0.001	0.94 [ 0.89-0.97]	0.83 [ 0.74-0.90]	TRUE
6	Sedentary time	Standard, Choi, 90min, VM, 200cpm	Standard, Triano, 60min, VM, 200cpm	0.43 [ 0.19- 0.97]	Hours	<0.001	0.94 [ 0.88-0.97]	0.83 [ 0.73-0.89]	TRUE
6	Sedentary time	Standard, Zeros, 60min, VM, 150cpm	Standard, Zeros, 90min, VM, 100cpm	0.43 [ 0.20- 0.62]	Hours	<0.001	0.97 [ 0.95-0.98]	0.94 [ 0.90-0.96]	TRUE
6	Sedentary time	LFE, Triano, 180min, VM, 200cpm	Standard, Choi, 180min, VM, 100cpm	0.43 [ 0.24- 0.52]	Hours	<0.001	0.97 [ 0.95-0.99]	0.94 [ 0.90-0.96]	TRUE
6	Sedentary time	LFE, Triano, 90min, VM, 200cpm	Standard, Zeros, 60min, VM, 100cpm	0.43 [ 0.26- 0.49]	Hours	<0.001	0.97 [ 0.94-0.98]	0.93 [ 0.88-0.96]	TRUE
6	Sedentary time	LFE, Choi, 90min, Vertical, 200cpm	LFE, Triano, 180min, Vertical, 150cpm	0.43 [ 0.28- 0.60]	Hours	<0.001	0.98 [ 0.96-0.99]	0.93 [ 0.88-0.96]	TRUE
6	Sedentary time	Standard, Choi, 90min, Vertical, 200cpm	Standard, Zeros, 30min, Vertical, 200cpm	0.43 [ 0.28- 0.99]	Hours	<0.001	0.92 [ 0.85-0.95]	0.83 [ 0.72-0.89]	TRUE
6	Sedentary time	LFE, Triano, 180min, Vertical, 200cpm	Standard, Choi, 90min, Vertical, 100cpm	0.43 [ 0.33- 0.61]	Hours	<0.001	0.98 [ 0.96-0.99]	0.91 [ 0.85-0.94]	TRUE
6	Sedentary time	LFE, Triano, 180min, Vertical, 200cpm	Standard, Triano, 180min, Vertical, 100cpm	0.43 [ 0.36- 0.54]	Hours	<0.001	0.99 [ 0.99-1.00]	0.93 [ 0.89-0.96]	TRUE
6	Sedentary time	LFE, Choi, 90min, Vertical, 200cpm	Standard, Choi, 90min, Vertical, 100cpm	0.43 [ 0.36- 0.59]	Hours	<0.001	0.99 [ 0.99-1.00]	0.93 [ 0.90-0.96]	TRUE
6	Sedentary time	LFE, Zeros, 90min, Vertical, 200cpm	Standard, Choi, 180min, Vertical, 100cpm	0.43 [ 0.37- 0.70]	Hours	<0.001	0.97 [ 0.94-0.98]	0.91 [ 0.85-0.94]	TRUE
6	Sedentary time	LFE, Zeros, 180min, Vertical, 200cpm	Standard, Zeros, 180min, Vertical, 100cpm	0.43 [ 0.38- 0.54]	Hours	<0.001	0.98 [ 0.97-0.99]	0.91 [ 0.86-0.94]	TRUE
6	Sedentary time	LFE, Choi, 90min, Vertical, 200cpm	Standard, Zeros, 60min, Vertical, 100cpm	0.43 [ 0.39- 0.67]	Hours	<0.001	0.98 [ 0.96-0.99]	0.90 [ 0.85-0.94]	TRUE
6	Sedentary time	LFE, Choi, 90min, VM, 100cpm	LFE, Triano, 30min, VM, 150cpm	0.43 [-0.09- 1.27]	Hours	<0.001	0.81 [ 0.66-0.89]	0.69 [ 0.53-0.80]	TRUE
6	Sedentary time	LFE, Triano, 90min, Vertical, 150cpm	Standard, Zeros, 30min, Vertical, 100cpm	0.44 [ 0.10- 0.73]	Hours	<0.001	0.90 [ 0.82-0.95]	0.83 [ 0.72-0.90]	TRUE
6	Sedentary time	LFE, Zeros, 60min, Vertical, 200cpm	Standard, Triano, 180min, Vertical, 100cpm	0.44 [ 0.18- 0.62]	Hours	<0.001	0.96 [ 0.94-0.98]	0.93 [ 0.87-0.96]	TRUE
6	Sedentary time	Standard, Zeros, 30min, VM, 200cpm	Standard, Zeros, 60min, VM, 100cpm	0.44 [ 0.19- 0.74]	Hours	<0.001	0.88 [ 0.78-0.93]	0.84 [ 0.73-0.91]	TRUE
6	Sedentary time	Standard, Choi, 90min, VM, 100cpm	Standard, Triano, 60min, VM, 100cpm	0.44 [ 0.19- 0.87]	Hours	<0.001	0.95 [ 0.90-0.97]	0.85 [ 0.76-0.90]	TRUE
6	Sedentary time	Standard, Choi, 90min, Vertical, 200cpm	Standard, Triano, 60min, Vertical, 200cpm	0.44 [ 0.19- 0.95]	Hours	<0.001	0.94 [ 0.88-0.97]	0.84 [ 0.75-0.90]	TRUE
6	Sedentary time	Standard, Choi, 90min, Vertical, 150cpm	Standard, Triano, 60min, Vertical, 150cpm	0.44 [ 0.19- 0.96]	Hours	<0.001	0.94 [ 0.88-0.97]	0.84 [ 0.75-0.90]	TRUE
6	Sedentary time	Standard, Choi, 90min, Vertical, 100cpm	Standard, Triano, 60min, Vertical, 100cpm	0.44 [ 0.19- 0.99]	Hours	<0.001	0.94 [ 0.88-0.97]	0.84 [ 0.74-0.90]	TRUE
6	Sedentary time	LFE, Zeros, 60min, Vertical, 200cpm	Standard, Zeros, 30min, Vertical, 150cpm	0.44 [ 0.23- 0.77]	Hours	<0.001	0.92 [ 0.86-0.96]	0.86 [ 0.76-0.92]	TRUE
6	Sedentary time	LFE, Triano, 180min, VM, 200cpm	Standard, Zeros, 30min, VM, 150cpm	0.44 [ 0.26- 0.89]	Hours	<0.001	0.87 [ 0.77-0.93]	0.78 [ 0.65-0.87]	TRUE
6	Sedentary time	LFE, Choi, 90min, VM, 200cpm	Standard, Triano, 180min, VM, 100cpm	0.44 [ 0.27- 0.61]	Hours	<0.001	0.97 [ 0.95-0.99]	0.93 [ 0.88-0.96]	TRUE
6	Sedentary time	Standard, Choi, 90min, VM, 100cpm	Standard, Zeros, 30min, VM, 100cpm	0.44 [ 0.28- 0.98]	Hours	<0.001	0.92 [ 0.85-0.95]	0.82 [ 0.71-0.89]	TRUE
6	Sedentary time	Standard, Choi, 90min, Vertical, 100cpm	Standard, Zeros, 30min, Vertical, 100cpm	0.44 [ 0.28- 0.99]	Hours	<0.001	0.91 [ 0.85-0.95]	0.82 [ 0.71-0.89]	TRUE
6	Sedentary time	Standard, Choi, 90min, Vertical, 150cpm	Standard, Zeros, 30min, Vertical, 150cpm	0.44 [ 0.28- 0.99]	Hours	<0.001	0.92 [ 0.85-0.95]	0.83 [ 0.72-0.89]	TRUE
6	Sedentary time	Standard, Choi, 90min, VM, 150cpm	Standard, Zeros, 30min, VM, 150cpm	0.44 [ 0.28- 0.99]	Hours	<0.001	0.91 [ 0.84-0.95]	0.81 [ 0.70-0.88]	TRUE
6	Sedentary time	Standard, Choi, 90min, VM, 200cpm	Standard, Zeros, 30min, VM, 200cpm	0.44 [ 0.28- 0.99]	Hours	<0.001	0.91 [ 0.84-0.95]	0.81 [ 0.70-0.88]	TRUE
6	Sedentary time	LFE, Zeros, 60min, VM, 200cpm	Standard, Choi, 90min, VM, 100cpm	0.44 [ 0.30- 0.61]	Hours	<0.001	0.99 [ 0.97-0.99]	0.94 [ 0.90-0.96]	TRUE
6	Sedentary time	Standard, Triano, 180min, VM, 200cpm	Standard, Zeros, 60min, VM, 150cpm	0.44 [ 0.35- 0.62]	Hours	<0.001	0.97 [ 0.94-0.98]	0.89 [ 0.83-0.93]	TRUE
6	Sedentary time	LFE, Choi, 180min, VM, 200cpm	Standard, Choi, 180min, VM, 100cpm	0.44 [ 0.38- 0.58]	Hours	<0.001	0.99 [ 0.99-1.00]	0.94 [ 0.90-0.96]	TRUE
6	Sedentary time	LFE, Zeros, 180min, VM, 100cpm	Standard, Triano, 60min, VM, 100cpm	0.44 [-0.18- 0.79]	Hours	0.886	0.89 [ 0.80-0.94]	0.83 [ 0.73-0.90]	TRUE
6	Sedentary time	LFE, Zeros, 180min, VM, 150cpm	Standard, Zeros, 30min, VM, 150cpm	0.45 [ 0.02- 0.87]	Hours	<0.001	0.81 [ 0.68-0.90]	0.75 [ 0.60-0.85]	TRUE
6	Sedentary time	LFE, Zeros, 180min, Vertical, 100cpm	Standard, Zeros, 30min, Vertical, 100cpm	0.45 [ 0.03- 0.78]	Hours	<0.001	0.83 [ 0.70-0.90]	0.76 [ 0.62-0.86]	TRUE
6	Sedentary time	LFE, Zeros, 30min, Vertical, 100cpm	Standard, Zeros, 180min, VM, 150cpm	0.45 [ 0.04- 1.08]	Hours	<0.001	0.76 [ 0.59-0.86]	0.70 [ 0.53-0.82]	TRUE
6	Sedentary time	LFE, Choi, 90min, Vertical, 200cpm	Standard, Triano, 60min, Vertical, 150cpm	0.45 [ 0.11- 0.83]	Hours	<0.001	0.92 [ 0.85-0.96]	0.84 [ 0.74-0.90]	TRUE
6	Sedentary time	LFE, Triano, 30min, VM, 200cpm	Standard, Triano, 30min, VM, 150cpm	0.45 [ 0.16- 0.79]	Hours	<0.001	0.87 [ 0.77-0.93]	0.74 [ 0.61-0.84]	TRUE
6	Sedentary time	LFE, Choi, 90min, VM, 200cpm	LFE, Triano, 180min, VM, 150cpm	0.45 [ 0.29- 0.61]	Hours	<0.001	0.98 [ 0.96-0.99]	0.93 [ 0.88-0.96]	TRUE
6	Sedentary time	LFE, Choi, 180min, VM, 200cpm	Standard, Zeros, 90min, VM, 100cpm	0.45 [ 0.33- 0.66]	Hours	<0.001	0.98 [ 0.95-0.99]	0.92 [ 0.87-0.95]	TRUE
6	Sedentary time	LFE, Triano, 180min, VM, 200cpm	Standard, Choi, 90min, VM, 100cpm	0.45 [ 0.37- 0.61]	Hours	<0.001	0.98 [ 0.96-0.99]	0.91 [ 0.86-0.95]	TRUE
6	Sedentary time	LFE, Zeros, 60min, Vertical, 200cpm	Standard, Zeros, 60min, Vertical, 100cpm	0.45 [ 0.38- 0.59]	Hours	<0.001	0.99 [ 0.99-1.00]	0.93 [ 0.89-0.96]	TRUE
6	Sedentary time	LFE, Zeros, 180min, VM, 200cpm	Standard, Zeros, 180min, VM, 100cpm	0.45 [ 0.38- 0.60]	Hours	<0.001	0.99 [ 0.97-0.99]	0.92 [ 0.88-0.95]	TRUE
6	Sedentary time	LFE, Zeros, 90min, Vertical, 200cpm	Standard, Zeros, 90min, Vertical, 100cpm	0.45 [ 0.39- 0.56]	Hours	<0.001	0.99 [ 0.98-0.99]	0.93 [ 0.88-0.95]	TRUE
6	Sedentary time	LFE, Zeros, 60min, VM, 200cpm	Standard, Zeros, 60min, VM, 100cpm	0.45 [ 0.39- 0.62]	Hours	<0.001	0.99 [ 0.99-1.00]	0.93 [ 0.89-0.96]	TRUE
6	Sedentary time	LFE, Triano, 90min, VM, 150cpm	LFE, Zeros, 90min, VM, 100cpm	0.45 [-0.03- 0.61]	Hours	<0.001	0.97 [ 0.94-0.98]	0.94 [ 0.90-0.97]	TRUE
6	Sedentary time	LFE, Triano, 60min, Vertical, 100cpm	Standard, Choi, 180min, VM, 200cpm	0.45 [-0.08- 0.78]	Hours	0.846	0.85 [ 0.73-0.91]	0.81 [ 0.68-0.89]	TRUE
6	Sedentary time	LFE, Triano, 180min, VM, 100cpm	Standard, Triano, 30min, VM, 150cpm	0.46 [ 0.00- 1.39]	Hours	<0.001	0.59 [ 0.35-0.76]	0.45 [ 0.25-0.62]	TRUE
6	Sedentary time	LFE, Zeros, 180min, VM, 150cpm	Standard, Zeros, 60min, VM, 100cpm	0.46 [ 0.13- 0.85]	Hours	<0.001	0.94 [ 0.90-0.97]	0.89 [ 0.81-0.93]	TRUE
6	Sedentary time	LFE, Triano, 180min, VM, 100cpm	LFE, Triano, 30min, VM, 150cpm	0.46 [ 0.17- 1.23]	Hours	<0.001	0.78 [ 0.63-0.88]	0.67 [ 0.50-0.79]	TRUE
6	Sedentary time	LFE, Zeros, 60min, VM, 200cpm	Standard, Triano, 180min, VM, 100cpm	0.46 [ 0.22- 0.62]	Hours	<0.001	0.96 [ 0.93-0.98]	0.93 [ 0.87-0.96]	TRUE
6	Sedentary time	LFE, Triano, 60min, VM, 150cpm	LFE, Triano, 90min, VM, 100cpm	0.46 [ 0.28- 0.65]	Hours	<0.001	0.97 [ 0.95-0.98]	0.93 [ 0.88-0.96]	TRUE
6	Sedentary time	LFE, Triano, 180min, Vertical, 150cpm	LFE, Zeros, 90min, Vertical, 100cpm	0.46 [ 0.29- 0.59]	Hours	<0.001	0.97 [ 0.95-0.99]	0.91 [ 0.86-0.95]	TRUE
6	Sedentary time	Standard, Triano, 180min, Vertical, 150cpm	Standard, Zeros, 90min, Vertical, 100cpm	0.46 [ 0.29- 0.59]	Hours	<0.001	0.97 [ 0.95-0.99]	0.92 [ 0.86-0.95]	TRUE
6	Sedentary time	Standard, Choi, 90min, Vertical, 200cpm	Standard, Zeros, 60min, Vertical, 150cpm	0.46 [ 0.34- 0.56]	Hours	<0.001	0.99 [ 0.97-0.99]	0.93 [ 0.89-0.96]	TRUE
6	Sedentary time	LFE, Triano, 180min, VM, 200cpm	Standard, Triano, 180min, VM, 100cpm	0.46 [ 0.37- 0.54]	Hours	<0.001	0.99 [ 0.98-1.00]	0.93 [ 0.90-0.96]	TRUE
6	Sedentary time	LFE, Zeros, 90min, VM, 200cpm	Standard, Zeros, 90min, VM, 100cpm	0.46 [ 0.38- 0.62]	Hours	<0.001	0.99 [ 0.98-1.00]	0.93 [ 0.89-0.96]	TRUE
6	Sedentary time	LFE, Triano, 180min, VM, 200cpm	Standard, Zeros, 60min, VM, 100cpm	0.46 [ 0.39- 0.73]	Hours	<0.001	0.96 [ 0.93-0.98]	0.88 [ 0.81-0.93]	TRUE
6	Sedentary time	Standard, Triano, 60min, VM, 200cpm	Standard, Zeros, 60min, VM, 100cpm	0.47 [ 0.00- 0.90]	Hours	<0.001	0.92 [ 0.86-0.96]	0.85 [ 0.76-0.91]	TRUE
6	Sedentary time	Standard, Triano, 60min, Vertical, 200cpm	Standard, Zeros, 60min, Vertical, 100cpm	0.47 [ 0.01- 0.87]	Hours	<0.001	0.92 [ 0.85-0.96]	0.87 [ 0.78-0.92]	TRUE
6	Sedentary time	LFE, Zeros, 180min, Vertical, 200cpm	Standard, Zeros, 30min, Vertical, 200cpm	0.47 [ 0.11- 0.93]	Hours	<0.001	0.85 [ 0.73-0.91]	0.77 [ 0.63-0.86]	TRUE
6	Sedentary time	LFE, Triano, 180min, VM, 200cpm	Standard, Triano, 60min, VM, 150cpm	0.47 [ 0.15- 0.85]	Hours	<0.001	0.91 [ 0.84-0.95]	0.82 [ 0.71-0.89]	TRUE
6	Sedentary time	Standard, Choi, 180min, VM, 200cpm	Standard, Zeros, 90min, VM, 150cpm	0.47 [ 0.18- 0.58]	Hours	<0.001	0.97 [ 0.95-0.98]	0.93 [ 0.88-0.96]	TRUE
6	Sedentary time	LFE, Zeros, 60min, Vertical, 150cpm	Standard, Triano, 60min, Vertical, 100cpm	0.47 [ 0.20- 0.91]	Hours	<0.001	0.94 [ 0.88-0.97]	0.84 [ 0.75-0.90]	TRUE
6	Sedentary time	Standard, Triano, 180min, Vertical, 200cpm	Standard, Zeros, 60min, Vertical, 150cpm	0.47 [ 0.33- 0.58]	Hours	<0.001	0.96 [ 0.93-0.98]	0.89 [ 0.82-0.93]	TRUE
6	Sedentary time	Standard, Choi, 90min, VM, 200cpm	Standard, Zeros, 60min, VM, 150cpm	0.47 [ 0.35- 0.56]	Hours	<0.001	0.98 [ 0.97-0.99]	0.93 [ 0.88-0.96]	TRUE
6	Sedentary time	Standard, Choi, 180min, Vertical, 200cpm	Standard, Choi, 90min, Vertical, 150cpm	0.47 [ 0.37- 0.64]	Hours	<0.001	0.99 [ 0.97-0.99]	0.92 [ 0.87-0.95]	TRUE
6	Sedentary time	Standard, Choi, 180min, Vertical, 200cpm	Standard, Triano, 180min, Vertical, 150cpm	0.47 [ 0.38- 0.59]	Hours	<0.001	0.98 [ 0.97-0.99]	0.92 [ 0.87-0.95]	TRUE
6	Sedentary time	LFE, Zeros, 30min, Vertical, 150cpm	Standard, Triano, 30min, Vertical, 200cpm	0.47 [-0.28- 1.21]	Hours	0.684	0.68 [ 0.48-0.82]	0.59 [ 0.39-0.73]	TRUE
6	Sedentary time	LFE, Choi, 90min, VM, 100cpm	Standard, Triano, 30min, VM, 150cpm	0.47 [-0.32- 1.35]	Hours	0.612	0.61 [ 0.38-0.77]	0.47 [ 0.27-0.63]	TRUE
6	Sedentary time	LFE, Triano, 60min, VM, 150cpm	Standard, Triano, 30min, VM, 200cpm	0.47 [-0.39- 1.17]	Hours	0.664	0.66 [ 0.45-0.81]	0.55 [ 0.35-0.70]	TRUE
6	Sedentary time	Standard, Triano, 90min, VM, 150cpm	Standard, Zeros, 60min, VM, 100cpm	0.48 [ 0.11- 0.60]	Hours	<0.001	0.96 [ 0.93-0.98]	0.92 [ 0.86-0.95]	TRUE
6	Sedentary time	LFE, Triano, 30min, VM, 150cpm	Standard, Triano, 30min, VM, 100cpm	0.48 [ 0.19- 0.83]	Hours	<0.001	0.87 [ 0.77-0.93]	0.73 [ 0.59-0.83]	TRUE
6	Sedentary time	LFE, Choi, 90min, Vertical, 150cpm	Standard, Triano, 60min, Vertical, 100cpm	0.48 [ 0.19- 0.97]	Hours	<0.001	0.92 [ 0.85-0.95]	0.81 [ 0.70-0.88]	TRUE
6	Sedentary time	LFE, Zeros, 180min, VM, 200cpm	Standard, Triano, 90min, VM, 150cpm	0.48 [ 0.22- 0.96]	Hours	<0.001	0.93 [ 0.87-0.96]	0.85 [ 0.75-0.91]	TRUE
6	Sedentary time	LFE, Zeros, 60min, VM, 150cpm	LFE, Zeros, 90min, VM, 100cpm	0.48 [ 0.25- 0.68]	Hours	<0.001	0.98 [ 0.96-0.99]	0.93 [ 0.89-0.96]	TRUE
6	Sedentary time	LFE, Choi, 180min, Vertical, 150cpm	LFE, Zeros, 90min, Vertical, 100cpm	0.48 [ 0.31- 0.75]	Hours	<0.001	0.97 [ 0.94-0.98]	0.89 [ 0.83-0.93]	TRUE
6	Sedentary time	Standard, Choi, 180min, VM, 200cpm	Standard, Choi, 90min, VM, 150cpm	0.48 [ 0.33- 0.65]	Hours	<0.001	0.98 [ 0.96-0.99]	0.90 [ 0.85-0.94]	TRUE
6	Sedentary time	LFE, Triano, 180min, Vertical, 200cpm	LFE, Zeros, 60min, Vertical, 150cpm	0.48 [ 0.34- 0.62]	Hours	<0.001	0.97 [ 0.94-0.98]	0.89 [ 0.83-0.93]	TRUE
6	Sedentary time	LFE, Choi, 90min, VM, 200cpm	Standard, Choi, 90min, VM, 100cpm	0.48 [ 0.38- 0.60]	Hours	<0.001	0.99 [ 0.99-1.00]	0.94 [ 0.90-0.96]	TRUE
6	Sedentary time	LFE, Triano, 180min, Vertical, 200cpm	Standard, Triano, 60min, Vertical, 150cpm	0.49 [ 0.11- 0.83]	Hours	<0.001	0.90 [ 0.81-0.94]	0.81 [ 0.69-0.89]	TRUE
6	Sedentary time	LFE, Choi, 90min, Vertical, 200cpm	LFE, Zeros, 60min, Vertical, 150cpm	0.49 [ 0.37- 0.60]	Hours	<0.001	0.99 [ 0.98-0.99]	0.92 [ 0.88-0.95]	TRUE
6	Sedentary time	LFE, Choi, 90min, VM, 200cpm	LFE, Zeros, 60min, VM, 150cpm	0.49 [ 0.42- 0.62]	Hours	<0.001	0.98 [ 0.97-0.99]	0.92 [ 0.87-0.95]	TRUE
6	Sedentary time	LFE, Triano, 60min, Vertical, 100cpm	Standard, Triano, 180min, VM, 200cpm	0.49 [-0.10- 0.90]	Hours	<0.001	0.84 [ 0.72-0.91]	0.78 [ 0.65-0.87]	TRUE
6	Sedentary time	LFE, Zeros, 30min, Vertical, 100cpm	Standard, Zeros, 90min, VM, 200cpm	0.50 [ 0.00- 0.86]	Hours	0.849	0.85 [ 0.73-0.92]	0.81 [ 0.68-0.89]	TRUE
6	Sedentary time	LFE, Zeros, 180min, Vertical, 100cpm	Standard, Triano, 30min, Vertical, 200cpm	0.50 [ 0.08- 1.62]	Hours	<0.001	0.52 [ 0.26-0.71]	0.42 [ 0.19-0.60]	TRUE
6	Sedentary time	LFE, Triano, 180min, Vertical, 200cpm	Standard, Zeros, 30min, Vertical, 150cpm	0.50 [ 0.25- 0.86]	Hours	<0.001	0.88 [ 0.78-0.93]	0.79 [ 0.66-0.87]	TRUE
6	Sedentary time	Standard, Choi, 180min, VM, 200cpm	Standard, Triano, 180min, VM, 150cpm	0.50 [ 0.31- 0.74]	Hours	<0.001	0.97 [ 0.94-0.98]	0.90 [ 0.85-0.94]	TRUE
6	Sedentary time	Standard, Choi, 90min, Vertical, 150cpm	Standard, Triano, 180min, Vertical, 100cpm	0.50 [ 0.32- 0.70]	Hours	<0.001	0.98 [ 0.96-0.99]	0.91 [ 0.86-0.95]	TRUE
6	Sedentary time	LFE, Triano, 180min, VM, 200cpm	LFE, Zeros, 60min, VM, 150cpm	0.50 [ 0.36- 0.71]	Hours	<0.001	0.97 [ 0.94-0.98]	0.89 [ 0.83-0.93]	TRUE
6	Sedentary time	LFE, Choi, 180min, Vertical, 200cpm	LFE, Choi, 90min, Vertical, 150cpm	0.50 [ 0.38- 0.63]	Hours	<0.001	0.98 [ 0.96-0.99]	0.90 [ 0.84-0.93]	TRUE
6	Sedentary time	LFE, Triano, 180min, Vertical, 100cpm	Standard, Zeros, 180min, VM, 200cpm	0.51 [ 0.17- 0.93]	Hours	<0.001	0.86 [ 0.75-0.92]	0.79 [ 0.65-0.87]	TRUE
6	Sedentary time	LFE, Zeros, 180min, Vertical, 200cpm	Standard, Triano, 90min, Vertical, 150cpm	0.51 [ 0.23- 0.88]	Hours	<0.001	0.93 [ 0.86-0.96]	0.84 [ 0.74-0.90]	TRUE
6	Sedentary time	Standard, Choi, 90min, VM, 150cpm	Standard, Triano, 180min, VM, 100cpm	0.51 [ 0.26- 0.72]	Hours	<0.001	0.97 [ 0.94-0.98]	0.90 [ 0.84-0.94]	TRUE
6	Sedentary time	LFE, Triano, 60min, VM, 200cpm	LFE, Zeros, 30min, VM, 150cpm	0.51 [ 0.27- 0.74]	Hours	<0.001	0.97 [ 0.95-0.99]	0.91 [ 0.86-0.95]	TRUE
6	Sedentary time	LFE, Triano, 60min, Vertical, 200cpm	LFE, Zeros, 30min, Vertical, 150cpm	0.51 [ 0.28- 0.63]	Hours	<0.001	0.98 [ 0.96-0.99]	0.92 [ 0.87-0.95]	TRUE
6	Sedentary time	LFE, Choi, 90min, VM, 150cpm	Standard, Zeros, 30min, VM, 100cpm	0.51 [ 0.32- 0.99]	Hours	<0.001	0.90 [ 0.82-0.95]	0.80 [ 0.69-0.88]	TRUE
6	Sedentary time	Standard, Triano, 180min, VM, 150cpm	Standard, Zeros, 90min, VM, 100cpm	0.51 [ 0.35- 0.67]	Hours	<0.001	0.98 [ 0.96-0.99]	0.92 [ 0.87-0.95]	TRUE
6	Sedentary time	LFE, Triano, 180min, Vertical, 200cpm	Standard, Zeros, 60min, Vertical, 100cpm	0.51 [ 0.36- 0.71]	Hours	<0.001	0.96 [ 0.93-0.98]	0.87 [ 0.80-0.92]	TRUE
6	Sedentary time	LFE, Choi, 90min, VM, 200cpm	Standard, Zeros, 60min, VM, 100cpm	0.51 [ 0.39- 0.62]	Hours	<0.001	0.98 [ 0.96-0.99]	0.91 [ 0.85-0.94]	TRUE
6	Sedentary time	LFE, Choi, 180min, VM, 200cpm	Standard, Triano, 180min, VM, 100cpm	0.51 [ 0.39- 0.79]	Hours	<0.001	0.97 [ 0.95-0.99]	0.90 [ 0.83-0.94]	TRUE
6	Sedentary time	Standard, Zeros, 180min, Vertical, 150cpm	Standard, Zeros, 30min, Vertical, 200cpm	0.52 [ 0.12- 0.94]	Hours	<0.001	0.86 [ 0.76-0.92]	0.78 [ 0.65-0.87]	TRUE
6	Sedentary time	LFE, Zeros, 30min, Vertical, 100cpm	Standard, Choi, 90min, VM, 200cpm	0.52 [ 0.12- 0.99]	Hours	<0.001	0.86 [ 0.75-0.92]	0.80 [ 0.66-0.88]	TRUE
6	Sedentary time	LFE, Choi, 90min, VM, 150cpm	LFE, Zeros, 90min, VM, 100cpm	0.52 [ 0.24- 0.66]	Hours	<0.001	0.98 [ 0.96-0.99]	0.93 [ 0.88-0.96]	TRUE
6	Sedentary time	LFE, Triano, 60min, Vertical, 200cpm	LFE, Zeros, 90min, Vertical, 100cpm	0.52 [ 0.26- 0.92]	Hours	<0.001	0.92 [ 0.85-0.96]	0.85 [ 0.76-0.91]	TRUE
6	Sedentary time	LFE, Zeros, 60min, VM, 150cpm	Standard, Zeros, 30min, VM, 100cpm	0.52 [ 0.27- 0.89]	Hours	<0.001	0.92 [ 0.86-0.96]	0.83 [ 0.73-0.90]	TRUE
6	Sedentary time	Standard, Triano, 60min, VM, 200cpm	Standard, Zeros, 30min, VM, 150cpm	0.52 [ 0.29- 0.65]	Hours	<0.001	0.93 [ 0.87-0.96]	0.86 [ 0.77-0.92]	TRUE
6	Sedentary time	LFE, Choi, 90min, Vertical, 150cpm	Standard, Zeros, 30min, Vertical, 100cpm	0.52 [ 0.31- 0.92]	Hours	<0.001	0.89 [ 0.81-0.94]	0.79 [ 0.67-0.87]	TRUE
6	Sedentary time	Standard, Zeros, 180min, Vertical, 200cpm	Standard, Zeros, 90min, Vertical, 150cpm	0.52 [ 0.38- 0.83]	Hours	<0.001	0.97 [ 0.94-0.98]	0.86 [ 0.79-0.91]	TRUE
6	Sedentary time	LFE, Triano, 90min, VM, 200cpm	Standard, Triano, 90min, VM, 100cpm	0.52 [ 0.42- 0.68]	Hours	<0.001	0.99 [ 0.98-0.99]	0.91 [ 0.86-0.94]	TRUE
6	Sedentary time	LFE, Choi, 180min, VM, 200cpm	Standard, Choi, 90min, VM, 100cpm	0.52 [ 0.42- 0.84]	Hours	<0.001	0.98 [ 0.96-0.99]	0.89 [ 0.83-0.93]	TRUE
6	Sedentary time	LFE, Triano, 60min, Vertical, 100cpm	LFE, Zeros, 180min, VM, 200cpm	0.52 [-0.04- 1.14]	Hours	<0.001	0.74 [ 0.57-0.86]	0.67 [ 0.49-0.80]	TRUE
6	Sedentary time	LFE, Triano, 30min, Vertical, 150cpm	Standard, Zeros, 60min, VM, 200cpm	0.52 [-0.44- 0.93]	Hours	0.705	0.71 [ 0.51-0.83]	0.67 [ 0.48-0.80]	TRUE
6	Sedentary time	Standard, Zeros, 180min, VM, 150cpm	Standard, Zeros, 30min, VM, 200cpm	0.53 [ 0.14- 0.99]	Hours	<0.001	0.84 [ 0.72-0.91]	0.75 [ 0.60-0.85]	TRUE
6	Sedentary time	LFE, Triano, 180min, Vertical, 100cpm	LFE, Triano, 30min, Vertical, 150cpm	0.53 [ 0.17- 1.25]	Hours	<0.001	0.75 [ 0.59-0.86]	0.65 [ 0.46-0.77]	TRUE
6	Sedentary time	LFE, Zeros, 30min, Vertical, 200cpm	LFE, Zeros, 90min, Vertical, 100cpm	0.53 [ 0.22- 0.83]	Hours	<0.001	0.93 [ 0.87-0.96]	0.86 [ 0.77-0.92]	TRUE
6	Sedentary time	LFE, Zeros, 60min, Vertical, 150cpm	Standard, Zeros, 30min, Vertical, 100cpm	0.53 [ 0.29- 0.88]	Hours	<0.001	0.92 [ 0.86-0.96]	0.83 [ 0.73-0.90]	TRUE
6	Sedentary time	LFE, Triano, 60min, Vertical, 100cpm	Standard, Zeros, 60min, VM, 200cpm	0.53 [ 0.34- 0.92]	Hours	<0.001	0.90 [ 0.81-0.94]	0.81 [ 0.69-0.88]	TRUE
6	Sedentary time	LFE, Choi, 180min, Vertical, 200cpm	Standard, Choi, 90min, Vertical, 100cpm	0.53 [ 0.38- 0.70]	Hours	<0.001	0.98 [ 0.96-0.99]	0.89 [ 0.83-0.93]	TRUE
6	Sedentary time	LFE, Choi, 90min, Vertical, 150cpm	LFE, Triano, 180min, Vertical, 100cpm	0.53 [ 0.39- 0.72]	Hours	<0.001	0.97 [ 0.95-0.99]	0.89 [ 0.83-0.93]	TRUE
6	Sedentary time	LFE, Triano, 60min, Vertical, 100cpm	Standard, Zeros, 180min, VM, 150cpm	0.53 [-0.07- 1.12]	Hours	<0.001	0.78 [ 0.62-0.88]	0.72 [ 0.55-0.83]	TRUE
6	Sedentary time	Standard, Triano, 30min, Vertical, 200cpm	Standard, Zeros, 90min, VM, 200cpm	0.53 [-0.31- 1.21]	Hours	0.381	0.38 [ 0.09-0.61]	0.34 [ 0.08-0.56]	TRUE
6	Sedentary time	LFE, Triano, 180min, Vertical, 100cpm	Standard, Triano, 30min, Vertical, 150cpm	0.54 [ 0.05- 1.55]	Hours	<0.001	0.55 [ 0.29-0.73]	0.42 [ 0.21-0.60]	TRUE
6	Sedentary time	LFE, Zeros, 180min, VM, 200cpm	Standard, Zeros, 30min, VM, 200cpm	0.54 [ 0.08- 0.92]	Hours	<0.001	0.82 [ 0.68-0.90]	0.74 [ 0.59-0.84]	TRUE
6	Sedentary time	Standard, Triano, 60min, Vertical, 200cpm	Standard, Zeros, 30min, Vertical, 150cpm	0.54 [ 0.22- 0.70]	Hours	<0.001	0.93 [ 0.87-0.96]	0.86 [ 0.78-0.92]	TRUE
6	Sedentary time	Standard, Triano, 180min, VM, 100cpm	Standard, Triano, 60min, VM, 100cpm	0.54 [ 0.22- 0.93]	Hours	<0.001	0.92 [ 0.86-0.96]	0.81 [ 0.71-0.88]	TRUE
6	Sedentary time	LFE, Zeros, 30min, Vertical, 100cpm	Standard, Zeros, 60min, VM, 200cpm	0.54 [ 0.29- 0.92]	Hours	<0.001	0.89 [ 0.80-0.94]	0.80 [ 0.68-0.88]	TRUE
6	Sedentary time	LFE, Triano, 180min, VM, 150cpm	LFE, Zeros, 90min, VM, 100cpm	0.54 [ 0.32- 0.72]	Hours	<0.001	0.98 [ 0.96-0.99]	0.92 [ 0.86-0.95]	TRUE
6	Sedentary time	LFE, Triano, 180min, Vertical, 150cpm	Standard, Zeros, 30min, Vertical, 100cpm	0.54 [ 0.34- 0.98]	Hours	<0.001	0.87 [ 0.78-0.93]	0.76 [ 0.62-0.85]	TRUE
6	Sedentary time	LFE, Choi, 180min, Vertical, 200cpm	Standard, Triano, 180min, Vertical, 100cpm	0.54 [ 0.39- 0.70]	Hours	<0.001	0.98 [ 0.96-0.99]	0.90 [ 0.84-0.93]	TRUE
6	Sedentary time	Standard, Choi, 180min, Vertical, 200cpm	Standard, Zeros, 60min, Vertical, 150cpm	0.54 [ 0.40- 0.72]	Hours	<0.001	0.97 [ 0.95-0.98]	0.89 [ 0.82-0.93]	TRUE
6	Sedentary time	LFE, Zeros, 180min, Vertical, 150cpm	Standard, Triano, 60min, Vertical, 150cpm	0.54 [-0.11- 0.96]	Hours	<0.001	0.87 [ 0.76-0.93]	0.80 [ 0.67-0.88]	TRUE
6	Sedentary time	LFE, Zeros, 180min, Vertical, 100cpm	Standard, Triano, 60min, Vertical, 100cpm	0.54 [-0.20- 0.92]	Hours	<0.001	0.85 [ 0.74-0.92]	0.80 [ 0.66-0.88]	TRUE
6	Sedentary time	LFE, Triano, 90min, Vertical, 100cpm	Standard, Triano, 30min, Vertical, 150cpm	0.54 [-0.26- 1.36]	Hours	0.563	0.56 [ 0.31-0.74]	0.47 [ 0.24-0.64]	TRUE
6	Sedentary time	LFE, Triano, 180min, VM, 150cpm	Standard, Triano, 60min, VM, 100cpm	0.55 [ 0.24- 0.91]	Hours	<0.001	0.92 [ 0.86-0.96]	0.81 [ 0.71-0.88]	TRUE
6	Sedentary time	LFE, Triano, 90min, Vertical, 150cpm	LFE, Zeros, 60min, Vertical, 100cpm	0.55 [ 0.36- 0.66]	Hours	<0.001	0.97 [ 0.94-0.98]	0.91 [ 0.85-0.94]	TRUE
6	Sedentary time	LFE, Zeros, 90min, VM, 200cpm	Standard, Choi, 180min, VM, 100cpm	0.55 [ 0.36- 0.72]	Hours	<0.001	0.97 [ 0.94-0.98]	0.91 [ 0.85-0.95]	TRUE
6	Sedentary time	LFE, Choi, 180min, VM, 200cpm	LFE, Choi, 90min, VM, 150cpm	0.55 [ 0.36- 0.78]	Hours	<0.001	0.98 [ 0.96-0.99]	0.89 [ 0.83-0.93]	TRUE
6	Sedentary time	LFE, Choi, 180min, Vertical, 200cpm	LFE, Triano, 180min, Vertical, 150cpm	0.55 [ 0.38- 0.66]	Hours	<0.001	0.98 [ 0.96-0.99]	0.90 [ 0.84-0.94]	TRUE
6	Sedentary time	Standard, Choi, 180min, VM, 200cpm	Standard, Zeros, 60min, VM, 150cpm	0.55 [ 0.39- 0.81]	Hours	<0.001	0.96 [ 0.94-0.98]	0.87 [ 0.80-0.92]	TRUE
6	Sedentary time	LFE, Choi, 180min, VM, 200cpm	Standard, Zeros, 60min, VM, 100cpm	0.55 [ 0.43- 0.89]	Hours	<0.001	0.97 [ 0.94-0.98]	0.86 [ 0.78-0.91]	TRUE
6	Sedentary time	LFE, Triano, 30min, Vertical, 100cpm	Standard, Zeros, 90min, VM, 100cpm	0.55 [-0.26- 1.28]	Hours	0.565	0.56 [ 0.31-0.74]	0.51 [ 0.28-0.69]	TRUE
6	Sedentary time	LFE, Triano, 60min, Vertical, 100cpm	Standard, Choi, 90min, VM, 200cpm	0.56 [ 0.11- 0.98]	Hours	<0.001	0.87 [ 0.77-0.93]	0.80 [ 0.68-0.88]	TRUE
6	Sedentary time	Standard, Triano, 180min, Vertical, 200cpm	Standard, Zeros, 30min, Vertical, 200cpm	0.56 [ 0.33- 0.95]	Hours	<0.001	0.88 [ 0.79-0.94]	0.77 [ 0.64-0.86]	TRUE
6	Sedentary time	Standard, Triano, 180min, Vertical, 100cpm	Standard, Zeros, 30min, Vertical, 100cpm	0.56 [ 0.34- 0.95]	Hours	<0.001	0.88 [ 0.78-0.93]	0.77 [ 0.64-0.86]	TRUE
6	Sedentary time	Standard, Triano, 180min, Vertical, 150cpm	Standard, Zeros, 30min, Vertical, 150cpm	0.56 [ 0.34- 0.95]	Hours	<0.001	0.88 [ 0.79-0.94]	0.77 [ 0.64-0.86]	TRUE
6	Sedentary time	Standard, Triano, 180min, VM, 100cpm	Standard, Zeros, 30min, VM, 100cpm	0.56 [ 0.34- 0.95]	Hours	<0.001	0.88 [ 0.78-0.93]	0.76 [ 0.63-0.85]	TRUE
6	Sedentary time	Standard, Triano, 180min, VM, 150cpm	Standard, Zeros, 30min, VM, 150cpm	0.56 [ 0.34- 0.95]	Hours	<0.001	0.87 [ 0.77-0.93]	0.76 [ 0.62-0.85]	TRUE
6	Sedentary time	Standard, Triano, 180min, VM, 200cpm	Standard, Zeros, 30min, VM, 200cpm	0.56 [ 0.34- 0.95]	Hours	<0.001	0.87 [ 0.76-0.93]	0.75 [ 0.61-0.85]	TRUE
6	Sedentary time	LFE, Choi, 180min, VM, 200cpm	LFE, Triano, 180min, VM, 150cpm	0.56 [ 0.38- 0.77]	Hours	<0.001	0.97 [ 0.95-0.98]	0.89 [ 0.83-0.93]	TRUE
6	Sedentary time	LFE, Choi, 90min, Vertical, 200cpm	LFE, Triano, 90min, Vertical, 150cpm	0.56 [ 0.40- 0.77]	Hours	<0.001	0.98 [ 0.97-0.99]	0.89 [ 0.83-0.93]	TRUE
6	Sedentary time	LFE, Triano, 30min, Vertical, 100cpm	Standard, Choi, 180min, VM, 100cpm	0.56 [-0.14- 1.23]	Hours	0.571	0.57 [ 0.32-0.75]	0.52 [ 0.28-0.69]	TRUE
6	Sedentary time	LFE, Triano, 60min, Vertical, 150cpm	Standard, Triano, 30min, Vertical, 200cpm	0.56 [-0.21- 1.21]	Hours	0.647	0.65 [ 0.43-0.79]	0.57 [ 0.36-0.72]	TRUE
6	Sedentary time	LFE, Choi, 180min, Vertical, 200cpm	Standard, Triano, 60min, Vertical, 150cpm	0.57 [ 0.18- 1.00]	Hours	<0.001	0.90 [ 0.82-0.95]	0.79 [ 0.67-0.87]	TRUE
6	Sedentary time	Standard, Triano, 180min, VM, 150cpm	Standard, Triano, 60min, VM, 150cpm	0.57 [ 0.24- 0.93]	Hours	<0.001	0.91 [ 0.85-0.95]	0.80 [ 0.69-0.87]	TRUE
6	Sedentary time	Standard, Triano, 180min, VM, 200cpm	Standard, Triano, 60min, VM, 200cpm	0.57 [ 0.26- 0.94]	Hours	<0.001	0.91 [ 0.84-0.95]	0.79 [ 0.67-0.87]	TRUE
6	Sedentary time	Standard, Choi, 180min, Vertical, 150cpm	Standard, Zeros, 90min, Vertical, 100cpm	0.57 [ 0.29- 0.72]	Hours	<0.001	0.98 [ 0.96-0.99]	0.91 [ 0.85-0.94]	TRUE
6	Sedentary time	Standard, Triano, 90min, Vertical, 200cpm	Standard, Zeros, 90min, Vertical, 100cpm	0.57 [ 0.30- 0.96]	Hours	<0.001	0.96 [ 0.93-0.98]	0.87 [ 0.79-0.92]	TRUE
6	Sedentary time	LFE, Triano, 90min, Vertical, 100cpm	Standard, Zeros, 90min, VM, 200cpm	0.57 [ 0.31- 0.93]	Hours	<0.001	0.90 [ 0.82-0.95]	0.81 [ 0.70-0.88]	TRUE
6	Sedentary time	LFE, Triano, 90min, VM, 150cpm	LFE, Zeros, 60min, VM, 100cpm	0.57 [ 0.34- 0.72]	Hours	<0.001	0.97 [ 0.94-0.98]	0.90 [ 0.84-0.94]	TRUE
6	Sedentary time	Standard, Zeros, 180min, VM, 200cpm	Standard, Zeros, 90min, VM, 150cpm	0.57 [ 0.36- 0.80]	Hours	<0.001	0.96 [ 0.92-0.98]	0.85 [ 0.77-0.91]	TRUE
6	Sedentary time	LFE, Triano, 180min, VM, 150cpm	Standard, Zeros, 30min, VM, 100cpm	0.57 [ 0.38- 0.99]	Hours	<0.001	0.88 [ 0.79-0.93]	0.77 [ 0.64-0.86]	TRUE
6	Sedentary time	LFE, Choi, 180min, Vertical, 200cpm	Standard, Zeros, 60min, Vertical, 100cpm	0.57 [ 0.39- 0.85]	Hours	<0.001	0.96 [ 0.93-0.98]	0.86 [ 0.78-0.91]	TRUE
6	Sedentary time	LFE, Triano, 180min, Vertical, 200cpm	LFE, Triano, 90min, Vertical, 150cpm	0.57 [ 0.40- 0.82]	Hours	<0.001	0.98 [ 0.96-0.99]	0.87 [ 0.80-0.92]	TRUE
6	Sedentary time	LFE, Zeros, 90min, Vertical, 200cpm	Standard, Triano, 180min, Vertical, 100cpm	0.57 [ 0.41- 0.81]	Hours	<0.001	0.97 [ 0.95-0.98]	0.88 [ 0.81-0.93]	TRUE
6	Sedentary time	LFE, Triano, 30min, Vertical, 150cpm	Standard, Triano, 90min, VM, 200cpm	0.57 [-0.04- 1.19]	Hours	0.654	0.65 [ 0.44-0.80]	0.60 [ 0.39-0.75]	TRUE
6	Sedentary time	LFE, Triano, 30min, Vertical, 150cpm	Standard, Choi, 180min, VM, 150cpm	0.57 [-0.21- 1.27]	Hours	0.590	0.59 [ 0.35-0.76]	0.53 [ 0.30-0.70]	TRUE
6	Sedentary time	LFE, Triano, 90min, VM, 150cpm	Standard, Triano, 30min, VM, 200cpm	0.57 [-0.24- 1.54]	Hours	<0.001	0.60 [ 0.36-0.77]	0.44 [ 0.24-0.60]	TRUE
6	Sedentary time	Standard, Triano, 30min, Vertical, 100cpm	Standard, Triano, 60min, VM, 150cpm	0.58 [ 0.03- 1.22]	Hours	0.539	0.54 [ 0.28-0.72]	0.46 [ 0.22-0.64]	TRUE
6	Sedentary time	LFE, Triano, 90min, Vertical, 200cpm	LFE, Zeros, 180min, Vertical, 100cpm	0.58 [ 0.06- 0.95]	Hours	<0.001	0.90 [ 0.82-0.95]	0.84 [ 0.74-0.91]	TRUE
6	Sedentary time	LFE, Triano, 30min, Vertical, 150cpm	Standard, Triano, 30min, Vertical, 100cpm	0.58 [ 0.23- 1.00]	Hours	<0.001	0.87 [ 0.76-0.93]	0.69 [ 0.55-0.80]	TRUE
6	Sedentary time	Standard, Triano, 180min, Vertical, 200cpm	Standard, Triano, 60min, Vertical, 200cpm	0.58 [ 0.24- 0.94]	Hours	<0.001	0.91 [ 0.84-0.95]	0.80 [ 0.69-0.88]	TRUE
6	Sedentary time	Standard, Triano, 180min, Vertical, 150cpm	Standard, Triano, 60min, Vertical, 150cpm	0.58 [ 0.25- 0.97]	Hours	<0.001	0.91 [ 0.84-0.95]	0.80 [ 0.69-0.88]	TRUE
6	Sedentary time	Standard, Triano, 180min, Vertical, 100cpm	Standard, Triano, 60min, Vertical, 100cpm	0.58 [ 0.28- 0.99]	Hours	<0.001	0.91 [ 0.83-0.95]	0.80 [ 0.68-0.87]	TRUE
6	Sedentary time	LFE, Zeros, 180min, VM, 150cpm	Standard, Triano, 90min, VM, 100cpm	0.58 [ 0.29- 1.02]	Hours	<0.001	0.93 [ 0.88-0.96]	0.84 [ 0.74-0.90]	TRUE
6	Sedentary time	LFE, Choi, 180min, Vertical, 200cpm	Standard, Zeros, 30min, Vertical, 150cpm	0.58 [ 0.30- 0.94]	Hours	<0.001	0.89 [ 0.80-0.94]	0.78 [ 0.65-0.86]	TRUE
6	Sedentary time	Standard, Choi, 180min, VM, 150cpm	Standard, Triano, 60min, VM, 150cpm	0.58 [ 0.30- 1.14]	Hours	<0.001	0.92 [ 0.85-0.95]	0.77 [ 0.66-0.85]	TRUE
6	Sedentary time	LFE, Triano, 90min, Vertical, 200cpm	Standard, Triano, 90min, Vertical, 100cpm	0.58 [ 0.39- 0.70]	Hours	<0.001	0.99 [ 0.97-0.99]	0.90 [ 0.84-0.93]	TRUE
6	Sedentary time	LFE, Choi, 180min, Vertical, 200cpm	LFE, Zeros, 60min, Vertical, 150cpm	0.58 [ 0.40- 0.75]	Hours	<0.001	0.97 [ 0.95-0.99]	0.88 [ 0.81-0.92]	TRUE
6	Sedentary time	LFE, Zeros, 180min, Vertical, 200cpm	LFE, Zeros, 90min, Vertical, 150cpm	0.58 [ 0.41- 0.92]	Hours	<0.001	0.95 [ 0.91-0.97]	0.83 [ 0.73-0.89]	TRUE
6	Sedentary time	LFE, Zeros, 180min, Vertical, 200cpm	Standard, Zeros, 90min, Vertical, 100cpm	0.58 [ 0.41- 1.07]	Hours	<0.001	0.95 [ 0.91-0.97]	0.81 [ 0.72-0.88]	TRUE
6	Sedentary time	LFE, Zeros, 180min, VM, 200cpm	LFE, Zeros, 90min, VM, 150cpm	0.58 [ 0.42- 0.93]	Hours	<0.001	0.95 [ 0.91-0.97]	0.83 [ 0.74-0.89]	TRUE
6	Sedentary time	Standard, Choi, 90min, Vertical, 200cpm	Standard, Triano, 90min, Vertical, 150cpm	0.58 [ 0.44- 0.83]	Hours	<0.001	0.98 [ 0.96-0.99]	0.87 [ 0.81-0.92]	TRUE
6	Sedentary time	LFE, Triano, 180min, VM, 200cpm	LFE, Triano, 90min, VM, 150cpm	0.58 [ 0.46- 0.79]	Hours	<0.001	0.98 [ 0.96-0.99]	0.88 [ 0.82-0.92]	TRUE
6	Sedentary time	LFE, Triano, 180min, Vertical, 150cpm	LFE, Zeros, 60min, Vertical, 100cpm	0.58 [ 0.47- 0.75]	Hours	<0.001	0.97 [ 0.94-0.98]	0.86 [ 0.78-0.91]	TRUE
6	Sedentary time	LFE, Triano, 60min, VM, 200cpm	Standard, Triano, 60min, VM, 100cpm	0.58 [ 0.47- 0.84]	Hours	<0.001	0.96 [ 0.93-0.98]	0.83 [ 0.75-0.89]	TRUE
6	Sedentary time	Standard, Triano, 180min, Vertical, 150cpm	Standard, Zeros, 60min, Vertical, 100cpm	0.58 [ 0.48- 0.77]	Hours	<0.001	0.96 [ 0.93-0.98]	0.85 [ 0.77-0.91]	TRUE
6	Sedentary time	LFE, Zeros, 180min, VM, 150cpm	Standard, Triano, 60min, VM, 150cpm	0.58 [-0.09- 0.89]	Hours	<0.001	0.88 [ 0.78-0.93]	0.81 [ 0.69-0.88]	TRUE
6	Sedentary time	LFE, Zeros, 30min, Vertical, 100cpm	Standard, Triano, 180min, VM, 200cpm	0.59 [ 0.06- 1.00]	Hours	<0.001	0.81 [ 0.68-0.90]	0.76 [ 0.61-0.86]	TRUE
6	Sedentary time	LFE, Triano, 90min, VM, 200cpm	LFE, Zeros, 180min, VM, 100cpm	0.59 [ 0.17- 1.10]	Hours	<0.001	0.88 [ 0.79-0.94]	0.82 [ 0.70-0.89]	TRUE
6	Sedentary time	LFE, Choi, 90min, Vertical, 150cpm	LFE, Triano, 30min, Vertical, 200cpm	0.59 [ 0.17- 1.35]	Hours	<0.001	0.79 [ 0.64-0.88]	0.66 [ 0.49-0.78]	TRUE
6	Sedentary time	LFE, Zeros, 30min, Vertical, 150cpm	Standard, Zeros, 180min, VM, 200cpm	0.59 [ 0.24- 1.37]	Hours	<0.001	0.76 [ 0.60-0.87]	0.66 [ 0.48-0.79]	TRUE
6	Sedentary time	LFE, Zeros, 180min, Vertical, 150cpm	Standard, Triano, 90min, Vertical, 100cpm	0.59 [ 0.28- 1.03]	Hours	<0.001	0.93 [ 0.86-0.96]	0.81 [ 0.70-0.88]	TRUE
6	Sedentary time	Standard, Choi, 180min, VM, 100cpm	Standard, Triano, 60min, VM, 100cpm	0.59 [ 0.30- 1.14]	Hours	<0.001	0.92 [ 0.86-0.96]	0.79 [ 0.68-0.86]	TRUE
6	Sedentary time	Standard, Choi, 180min, VM, 200cpm	Standard, Triano, 60min, VM, 200cpm	0.59 [ 0.31- 1.15]	Hours	<0.001	0.91 [ 0.84-0.95]	0.77 [ 0.64-0.85]	TRUE
6	Sedentary time	Standard, Choi, 180min, Vertical, 200cpm	Standard, Triano, 60min, Vertical, 200cpm	0.59 [ 0.32- 1.14]	Hours	<0.001	0.91 [ 0.85-0.95]	0.79 [ 0.67-0.87]	TRUE
6	Sedentary time	Standard, Choi, 180min, Vertical, 100cpm	Standard, Triano, 60min, Vertical, 100cpm	0.59 [ 0.32- 1.15]	Hours	<0.001	0.91 [ 0.84-0.95]	0.78 [ 0.66-0.86]	TRUE
6	Sedentary time	Standard, Choi, 180min, Vertical, 150cpm	Standard, Triano, 60min, Vertical, 150cpm	0.59 [ 0.32- 1.15]	Hours	<0.001	0.91 [ 0.85-0.95]	0.78 [ 0.67-0.86]	TRUE
6	Sedentary time	LFE, Zeros, 30min, VM, 200cpm	LFE, Zeros, 90min, VM, 100cpm	0.59 [ 0.34- 0.98]	Hours	<0.001	0.91 [ 0.84-0.95]	0.83 [ 0.73-0.90]	TRUE
6	Sedentary time	Standard, Choi, 90min, Vertical, 150cpm	Standard, Zeros, 60min, Vertical, 100cpm	0.59 [ 0.43- 0.69]	Hours	<0.001	0.98 [ 0.97-0.99]	0.90 [ 0.84-0.94]	TRUE
6	Sedentary time	LFE, Choi, 180min, VM, 200cpm	LFE, Zeros, 60min, VM, 150cpm	0.59 [ 0.44- 0.80]	Hours	<0.001	0.97 [ 0.94-0.98]	0.87 [ 0.80-0.92]	TRUE
6	Sedentary time	Standard, Triano, 30min, Vertical, 100cpm	Standard, Zeros, 60min, VM, 100cpm	0.59 [-0.07- 1.38]	Hours	0.430	0.43 [ 0.15-0.65]	0.35 [ 0.11-0.55]	TRUE
6	Sedentary time	Standard, Choi, 90min, VM, 200cpm	Standard, Zeros, 180min, VM, 100cpm	0.60 [ 0.12- 1.01]	Hours	<0.001	0.92 [ 0.86-0.96]	0.85 [ 0.76-0.91]	TRUE
6	Sedentary time	LFE, Triano, 180min, Vertical, 150cpm	Standard, Triano, 60min, Vertical, 100cpm	0.60 [ 0.21- 0.94]	Hours	<0.001	0.89 [ 0.81-0.94]	0.78 [ 0.66-0.86]	TRUE
6	Sedentary time	LFE, Triano, 180min, VM, 150cpm	LFE, Triano, 30min, VM, 200cpm	0.60 [ 0.32- 1.40]	Hours	<0.001	0.77 [ 0.61-0.87]	0.61 [ 0.44-0.74]	TRUE
6	Sedentary time	Standard, Choi, 180min, VM, 150cpm	Standard, Zeros, 90min, VM, 100cpm	0.60 [ 0.39- 0.79]	Hours	<0.001	0.97 [ 0.94-0.98]	0.89 [ 0.83-0.93]	TRUE
6	Sedentary time	LFE, Choi, 90min, VM, 200cpm	LFE, Triano, 90min, VM, 150cpm	0.60 [ 0.43- 0.77]	Hours	<0.001	0.98 [ 0.97-0.99]	0.90 [ 0.84-0.94]	TRUE
6	Sedentary time	Standard, Choi, 90min, VM, 150cpm	Standard, Zeros, 60min, VM, 100cpm	0.60 [ 0.48- 0.75]	Hours	<0.001	0.98 [ 0.96-0.99]	0.89 [ 0.83-0.93]	TRUE
6	Sedentary time	LFE, Zeros, 90min, VM, 100cpm	Standard, Triano, 30min, VM, 150cpm	0.60 [-0.01- 1.54]	Hours	<0.001	0.59 [ 0.35-0.76]	0.43 [ 0.23-0.59]	TRUE
6	Sedentary time	LFE, Triano, 30min, Vertical, 150cpm	Standard, Zeros, 90min, VM, 150cpm	0.60 [-0.27- 1.34]	Hours	0.588	0.59 [ 0.35-0.76]	0.53 [ 0.30-0.70]	TRUE
6	Sedentary time	LFE, Zeros, 180min, Vertical, 200cpm	Standard, Triano, 60min, Vertical, 200cpm	0.61 [ 0.00- 0.96]	Hours	<0.001	0.87 [ 0.76-0.93]	0.79 [ 0.67-0.88]	TRUE
6	Sedentary time	LFE, Choi, 180min, VM, 100cpm	LFE, Triano, 30min, VM, 150cpm	0.61 [ 0.20- 1.30]	Hours	<0.001	0.81 [ 0.67-0.89]	0.66 [ 0.50-0.78]	TRUE
6	Sedentary time	LFE, Choi, 180min, VM, 200cpm	Standard, Triano, 60min, VM, 150cpm	0.61 [ 0.22- 0.94]	Hours	<0.001	0.92 [ 0.85-0.95]	0.80 [ 0.69-0.87]	TRUE
6	Sedentary time	Standard, Choi, 90min, Vertical, 200cpm	Standard, Zeros, 180min, Vertical, 100cpm	0.61 [ 0.34- 0.82]	Hours	<0.001	0.94 [ 0.90-0.97]	0.87 [ 0.78-0.92]	TRUE
6	Sedentary time	LFE, Zeros, 90min, Vertical, 200cpm	Standard, Zeros, 30min, Vertical, 150cpm	0.61 [ 0.35- 1.00]	Hours	<0.001	0.89 [ 0.80-0.94]	0.77 [ 0.65-0.86]	TRUE
6	Sedentary time	LFE, Zeros, 180min, Vertical, 200cpm	LFE, Zeros, 30min, Vertical, 200cpm	0.61 [ 0.35- 1.20]	Hours	<0.001	0.92 [ 0.86-0.96]	0.78 [ 0.67-0.86]	TRUE
6	Sedentary time	LFE, Zeros, 180min, Vertical, 150cpm	LFE, Zeros, 30min, Vertical, 150cpm	0.61 [ 0.36- 1.22]	Hours	<0.001	0.92 [ 0.85-0.96]	0.78 [ 0.66-0.86]	TRUE
6	Sedentary time	LFE, Zeros, 180min, Vertical, 100cpm	LFE, Zeros, 30min, Vertical, 100cpm	0.61 [ 0.36- 1.24]	Hours	<0.001	0.91 [ 0.85-0.95]	0.77 [ 0.65-0.86]	TRUE
6	Sedentary time	LFE, Zeros, 180min, VM, 100cpm	LFE, Zeros, 30min, VM, 100cpm	0.61 [ 0.36- 1.27]	Hours	<0.001	0.92 [ 0.85-0.95]	0.79 [ 0.67-0.87]	TRUE
6	Sedentary time	LFE, Zeros, 180min, VM, 150cpm	LFE, Zeros, 30min, VM, 150cpm	0.61 [ 0.36- 1.28]	Hours	<0.001	0.91 [ 0.84-0.95]	0.78 [ 0.66-0.86]	TRUE
6	Sedentary time	LFE, Zeros, 180min, VM, 200cpm	LFE, Zeros, 30min, VM, 200cpm	0.61 [ 0.36- 1.28]	Hours	<0.001	0.91 [ 0.84-0.95]	0.78 [ 0.66-0.86]	TRUE
6	Sedentary time	LFE, Zeros, 90min, VM, 200cpm	Standard, Zeros, 30min, VM, 150cpm	0.61 [ 0.37- 0.94]	Hours	<0.001	0.88 [ 0.79-0.94]	0.77 [ 0.64-0.85]	TRUE
6	Sedentary time	LFE, Zeros, 90min, VM, 200cpm	Standard, Triano, 180min, VM, 100cpm	0.61 [ 0.41- 0.81]	Hours	<0.001	0.97 [ 0.95-0.99]	0.89 [ 0.83-0.93]	TRUE
6	Sedentary time	LFE, Triano, 30min, Vertical, 100cpm	LFE, Triano, 60min, VM, 200cpm	0.61 [-0.02- 1.20]	Hours	0.684	0.68 [ 0.48-0.82]	0.61 [ 0.41-0.76]	TRUE
6	Sedentary time	LFE, Zeros, 180min, VM, 200cpm	Standard, Triano, 60min, VM, 200cpm	0.61 [-0.06- 0.93]	Hours	<0.001	0.87 [ 0.77-0.93]	0.79 [ 0.66-0.87]	TRUE
6	Sedentary time	LFE, Zeros, 30min, VM, 100cpm	Standard, Triano, 30min, VM, 100cpm	0.61 [-0.07- 1.47]	Hours	<0.001	0.72 [ 0.53-0.84]	0.53 [ 0.35-0.67]	TRUE
6	Sedentary time	LFE, Choi, 90min, VM, 150cpm	LFE, Triano, 30min, VM, 200cpm	0.62 [ 0.04- 1.37]	Hours	<0.001	0.79 [ 0.64-0.88]	0.63 [ 0.47-0.76]	TRUE
6	Sedentary time	LFE, Zeros, 180min, VM, 100cpm	Standard, Triano, 30min, VM, 200cpm	0.62 [ 0.06- 1.33]	Hours	<0.001	0.56 [ 0.31-0.74]	0.42 [ 0.21-0.59]	TRUE
6	Sedentary time	LFE, Choi, 180min, Vertical, 100cpm	Standard, Triano, 30min, Vertical, 150cpm	0.62 [ 0.20- 1.68]	Hours	<0.001	0.58 [ 0.34-0.75]	0.43 [ 0.22-0.60]	TRUE
6	Sedentary time	LFE, Choi, 180min, Vertical, 100cpm	LFE, Triano, 30min, Vertical, 150cpm	0.62 [ 0.22- 1.25]	Hours	<0.001	0.78 [ 0.62-0.87]	0.64 [ 0.47-0.77]	TRUE
6	Sedentary time	LFE, Choi, 180min, Vertical, 100cpm	Standard, Zeros, 180min, VM, 200cpm	0.62 [ 0.23- 0.98]	Hours	<0.001	0.88 [ 0.79-0.93]	0.79 [ 0.66-0.87]	TRUE
6	Sedentary time	LFE, Zeros, 90min, Vertical, 100cpm	Standard, Zeros, 180min, VM, 200cpm	0.62 [ 0.27- 1.27]	Hours	<0.001	0.86 [ 0.75-0.92]	0.76 [ 0.62-0.85]	TRUE
6	Sedentary time	LFE, Choi, 180min, VM, 200cpm	Standard, Zeros, 30min, VM, 150cpm	0.62 [ 0.33- 1.00]	Hours	<0.001	0.88 [ 0.79-0.94]	0.77 [ 0.64-0.86]	TRUE
6	Sedentary time	Standard, Choi, 180min, Vertical, 200cpm	Standard, Zeros, 30min, Vertical, 200cpm	0.62 [ 0.36- 1.04]	Hours	<0.001	0.90 [ 0.82-0.94]	0.77 [ 0.65-0.86]	TRUE
6	Sedentary time	Standard, Triano, 180min, Vertical, 200cpm	Standard, Triano, 90min, Vertical, 150cpm	0.62 [ 0.44- 0.95]	Hours	<0.001	0.97 [ 0.95-0.98]	0.85 [ 0.77-0.90]	TRUE
6	Sedentary time	Standard, Triano, 180min, VM, 200cpm	Standard, Triano, 90min, VM, 150cpm	0.62 [ 0.46- 0.92]	Hours	<0.001	0.97 [ 0.95-0.98]	0.85 [ 0.77-0.90]	TRUE
6	Sedentary time	LFE, Zeros, 90min, VM, 200cpm	Standard, Choi, 90min, VM, 100cpm	0.62 [ 0.47- 0.80]	Hours	<0.001	0.99 [ 0.97-0.99]	0.89 [ 0.83-0.93]	TRUE
6	Sedentary time	Standard, Triano, 180min, VM, 150cpm	Standard, Zeros, 60min, VM, 100cpm	0.62 [ 0.47- 0.80]	Hours	<0.001	0.97 [ 0.94-0.98]	0.85 [ 0.77-0.91]	TRUE
6	Sedentary time	LFE, Choi, 90min, Vertical, 100cpm	Standard, Triano, 30min, Vertical, 150cpm	0.62 [-0.06- 1.47]	Hours	<0.001	0.57 [ 0.32-0.75]	0.45 [ 0.23-0.62]	TRUE
6	Sedentary time	LFE, Triano, 30min, Vertical, 150cpm	LFE, Zeros, 90min, VM, 200cpm	0.62 [-0.11- 1.30]	Hours	0.538	0.54 [ 0.28-0.72]	0.48 [ 0.24-0.66]	TRUE
6	Sedentary time	LFE, Triano, 30min, Vertical, 100cpm	LFE, Zeros, 90min, VM, 150cpm	0.62 [-0.34- 1.16]	Hours	0.526	0.53 [ 0.26-0.72]	0.48 [ 0.23-0.66]	TRUE
6	Sedentary time	Standard, Triano, 30min, Vertical, 150cpm	Standard, Zeros, 60min, VM, 150cpm	0.63 [ 0.01- 1.31]	Hours	0.445	0.44 [ 0.16-0.66]	0.37 [ 0.13-0.57]	TRUE
6	Sedentary time	Standard, Triano, 90min, VM, 200cpm	Standard, Zeros, 90min, VM, 100cpm	0.63 [ 0.27- 0.97]	Hours	<0.001	0.95 [ 0.92-0.98]	0.86 [ 0.78-0.91]	TRUE
6	Sedentary time	Standard, Choi, 180min, Vertical, 100cpm	Standard, Zeros, 30min, Vertical, 100cpm	0.63 [ 0.36- 1.04]	Hours	<0.001	0.89 [ 0.81-0.94]	0.77 [ 0.64-0.85]	TRUE
6	Sedentary time	Standard, Choi, 180min, Vertical, 150cpm	Standard, Zeros, 30min, Vertical, 150cpm	0.63 [ 0.36- 1.04]	Hours	<0.001	0.90 [ 0.82-0.94]	0.77 [ 0.65-0.86]	TRUE
6	Sedentary time	LFE, Zeros, 90min, Vertical, 200cpm	Standard, Choi, 90min, Vertical, 100cpm	0.63 [ 0.42- 0.76]	Hours	<0.001	0.98 [ 0.97-0.99]	0.88 [ 0.82-0.92]	TRUE
6	Sedentary time	Standard, Choi, 180min, VM, 150cpm	Standard, Triano, 180min, VM, 100cpm	0.63 [ 0.43- 0.88]	Hours	<0.001	0.97 [ 0.94-0.98]	0.86 [ 0.79-0.91]	TRUE
6	Sedentary time	LFE, Choi, 90min, VM, 150cpm	LFE, Triano, 180min, VM, 100cpm	0.63 [ 0.44- 0.79]	Hours	<0.001	0.97 [ 0.94-0.98]	0.89 [ 0.82-0.93]	TRUE
6	Sedentary time	LFE, Choi, 180min, Vertical, 200cpm	LFE, Triano, 90min, Vertical, 150cpm	0.63 [ 0.44- 0.95]	Hours	<0.001	0.96 [ 0.93-0.98]	0.84 [ 0.75-0.90]	TRUE
6	Sedentary time	LFE, Choi, 90min, Vertical, 150cpm	LFE, Zeros, 60min, Vertical, 100cpm	0.63 [ 0.47- 0.75]	Hours	<0.001	0.98 [ 0.97-0.99]	0.89 [ 0.82-0.93]	TRUE
6	Sedentary time	Standard, Choi, 180min, Vertical, 150cpm	Standard, Choi, 90min, Vertical, 100cpm	0.63 [ 0.48- 0.77]	Hours	<0.001	0.98 [ 0.97-0.99]	0.88 [ 0.81-0.92]	TRUE
6	Sedentary time	LFE, Zeros, 60min, VM, 200cpm	Standard, Triano, 90min, VM, 100cpm	0.63 [ 0.49- 0.80]	Hours	<0.001	0.97 [ 0.94-0.98]	0.87 [ 0.79-0.92]	TRUE
6	Sedentary time	LFE, Triano, 30min, Vertical, 100cpm	Standard, Triano, 180min, VM, 100cpm	0.63 [-0.02- 1.27]	Hours	0.525	0.52 [ 0.26-0.71]	0.46 [ 0.22-0.65]	TRUE
6	Sedentary time	LFE, Triano, 30min, Vertical, 100cpm	LFE, Zeros, 30min, VM, 200cpm	0.63 [-0.14- 1.10]	Hours	0.725	0.72 [ 0.54-0.84]	0.65 [ 0.46-0.78]	TRUE
6	Sedentary time	LFE, Zeros, 60min, Vertical, 100cpm	Standard, Triano, 30min, Vertical, 150cpm	0.63 [-0.20- 1.46]	Hours	<0.001	0.61 [ 0.38-0.77]	0.49 [ 0.28-0.65]	TRUE
6	Sedentary time	LFE, Triano, 90min, Vertical, 100cpm	LFE, Zeros, 180min, VM, 200cpm	0.64 [ 0.13- 1.35]	Hours	<0.001	0.78 [ 0.63-0.88]	0.65 [ 0.48-0.78]	TRUE
6	Sedentary time	LFE, Triano, 90min, Vertical, 100cpm	Standard, Choi, 180min, VM, 200cpm	0.64 [ 0.20- 0.96]	Hours	<0.001	0.89 [ 0.79-0.94]	0.80 [ 0.67-0.88]	TRUE
6	Sedentary time	LFE, Triano, 180min, Vertical, 150cpm	LFE, Triano, 30min, Vertical, 200cpm	0.64 [ 0.24- 1.34]	Hours	<0.001	0.78 [ 0.62-0.87]	0.63 [ 0.46-0.76]	TRUE
6	Sedentary time	LFE, Choi, 180min, VM, 150cpm	LFE, Zeros, 90min, VM, 100cpm	0.64 [ 0.34- 0.79]	Hours	<0.001	0.97 [ 0.94-0.98]	0.89 [ 0.82-0.93]	TRUE
6	Sedentary time	Standard, Choi, 90min, VM, 200cpm	Standard, Triano, 90min, VM, 150cpm	0.64 [ 0.36- 0.80]	Hours	<0.001	0.97 [ 0.95-0.98]	0.87 [ 0.80-0.92]	TRUE
6	Sedentary time	LFE, Zeros, 90min, Vertical, 200cpm	Standard, Zeros, 60min, Vertical, 100cpm	0.64 [ 0.43- 0.82]	Hours	<0.001	0.97 [ 0.95-0.99]	0.86 [ 0.78-0.91]	TRUE
6	Sedentary time	LFE, Zeros, 180min, VM, 200cpm	Standard, Zeros, 90min, VM, 100cpm	0.64 [ 0.45- 0.95]	Hours	<0.001	0.95 [ 0.92-0.98]	0.83 [ 0.73-0.89]	TRUE
6	Sedentary time	LFE, Triano, 60min, Vertical, 200cpm	Standard, Zeros, 30min, Vertical, 100cpm	0.64 [ 0.46- 0.96]	Hours	<0.001	0.94 [ 0.89-0.97]	0.80 [ 0.70-0.87]	TRUE
6	Sedentary time	LFE, Choi, 180min, Vertical, 150cpm	LFE, Choi, 90min, Vertical, 100cpm	0.64 [ 0.49- 0.88]	Hours	<0.001	0.98 [ 0.96-0.99]	0.86 [ 0.78-0.91]	TRUE
6	Sedentary time	LFE, Zeros, 90min, Vertical, 200cpm	Standard, Triano, 60min, Vertical, 150cpm	0.65 [ 0.18- 1.01]	Hours	<0.001	0.91 [ 0.83-0.95]	0.79 [ 0.67-0.87]	TRUE
6	Sedentary time	Standard, Triano, 30min, Vertical, 100cpm	Standard, Zeros, 30min, VM, 150cpm	0.65 [ 0.24- 1.11]	Hours	<0.001	0.61 [ 0.38-0.77]	0.50 [ 0.29-0.67]	TRUE
6	Sedentary time	LFE, Choi, 180min, VM, 150cpm	Standard, Triano, 60min, VM, 100cpm	0.65 [ 0.29- 1.06]	Hours	<0.001	0.92 [ 0.86-0.96]	0.79 [ 0.68-0.87]	TRUE
6	Sedentary time	LFE, Choi, 180min, Vertical, 150cpm	Standard, Zeros, 30min, Vertical, 100cpm	0.65 [ 0.37- 1.04]	Hours	<0.001	0.89 [ 0.80-0.94]	0.75 [ 0.62-0.84]	TRUE
6	Sedentary time	LFE, Choi, 180min, VM, 200cpm	LFE, Triano, 90min, VM, 150cpm	0.65 [ 0.45- 0.95]	Hours	<0.001	0.96 [ 0.93-0.98]	0.84 [ 0.75-0.90]	TRUE
6	Sedentary time	Standard, Choi, 180min, VM, 150cpm	Standard, Choi, 90min, VM, 100cpm	0.65 [ 0.49- 0.86]	Hours	<0.001	0.98 [ 0.96-0.99]	0.86 [ 0.79-0.91]	TRUE
6	Sedentary time	LFE, Triano, 90min, Vertical, 100cpm	Standard, Zeros, 180min, VM, 150cpm	0.66 [ 0.22- 1.26]	Hours	<0.001	0.82 [ 0.69-0.90]	0.70 [ 0.54-0.81]	TRUE
6	Sedentary time	LFE, Zeros, 90min, VM, 200cpm	Standard, Triano, 60min, VM, 150cpm	0.66 [ 0.27- 1.04]	Hours	<0.001	0.92 [ 0.86-0.96]	0.80 [ 0.69-0.87]	TRUE
6	Sedentary time	LFE, Triano, 60min, Vertical, 150cpm	LFE, Zeros, 30min, Vertical, 100cpm	0.66 [ 0.34- 0.81]	Hours	<0.001	0.97 [ 0.95-0.99]	0.89 [ 0.82-0.93]	TRUE
6	Sedentary time	Standard, Triano, 60min, Vertical, 150cpm	Standard, Zeros, 30min, Vertical, 100cpm	0.66 [ 0.35- 0.84]	Hours	<0.001	0.93 [ 0.87-0.96]	0.83 [ 0.73-0.90]	TRUE
6	Sedentary time	LFE, Zeros, 60min, Vertical, 100cpm	Standard, Zeros, 180min, VM, 150cpm	0.66 [ 0.35- 1.42]	Hours	<0.001	0.81 [ 0.67-0.90]	0.67 [ 0.51-0.79]	TRUE
6	Sedentary time	Standard, Triano, 60min, VM, 150cpm	Standard, Zeros, 30min, VM, 100cpm	0.66 [ 0.41- 0.85]	Hours	<0.001	0.93 [ 0.88-0.96]	0.82 [ 0.72-0.89]	TRUE
6	Sedentary time	Standard, Triano, 180min, Vertical, 200cpm	Standard, Zeros, 180min, Vertical, 100cpm	0.66 [ 0.41- 0.93]	Hours	<0.001	0.94 [ 0.90-0.97]	0.85 [ 0.76-0.91]	TRUE
6	Sedentary time	LFE, Choi, 90min, Vertical, 200cpm	Standard, Triano, 90min, Vertical, 100cpm	0.66 [ 0.46- 0.95]	Hours	<0.001	0.97 [ 0.95-0.98]	0.85 [ 0.77-0.90]	TRUE
6	Sedentary time	Standard, Choi, 180min, Vertical, 150cpm	Standard, Triano, 180min, Vertical, 100cpm	0.66 [ 0.47- 0.78]	Hours	<0.001	0.98 [ 0.96-0.99]	0.88 [ 0.82-0.92]	TRUE
6	Sedentary time	LFE, Choi, 180min, VM, 100cpm	Standard, Triano, 30min, VM, 150cpm	0.67 [ 0.02- 1.50]	Hours	<0.001	0.62 [ 0.39-0.78]	0.45 [ 0.26-0.61]	TRUE
6	Sedentary time	LFE, Triano, 30min, Vertical, 200cpm	LFE, Zeros, 180min, VM, 200cpm	0.67 [ 0.02- 1.62]	Hours	<0.001	0.47 [ 0.19-0.68]	0.39 [ 0.15-0.58]	TRUE
6	Sedentary time	LFE, Zeros, 30min, VM, 200cpm	Standard, Triano, 60min, VM, 100cpm	0.67 [ 0.38- 0.96]	Hours	<0.001	0.94 [ 0.90-0.97]	0.81 [ 0.71-0.88]	TRUE
6	Sedentary time	Standard, Triano, 180min, VM, 200cpm	Standard, Zeros, 180min, VM, 100cpm	0.67 [ 0.39- 0.96]	Hours	<0.001	0.94 [ 0.89-0.97]	0.84 [ 0.75-0.90]	TRUE
6	Sedentary time	LFE, Triano, 60min, Vertical, 200cpm	Standard, Triano, 60min, Vertical, 100cpm	0.67 [ 0.43- 0.80]	Hours	<0.001	0.96 [ 0.93-0.98]	0.82 [ 0.73-0.89]	TRUE
6	Sedentary time	LFE, Zeros, 180min, Vertical, 200cpm	Standard, Choi, 180min, Vertical, 100cpm	0.67 [ 0.43- 0.96]	Hours	<0.001	0.96 [ 0.93-0.98]	0.82 [ 0.73-0.88]	TRUE
6	Sedentary time	LFE, Choi, 90min, VM, 150cpm	LFE, Zeros, 60min, VM, 100cpm	0.67 [ 0.53- 0.83]	Hours	<0.001	0.98 [ 0.96-0.99]	0.88 [ 0.81-0.92]	TRUE
6	Sedentary time	LFE, Triano, 180min, VM, 150cpm	LFE, Zeros, 60min, VM, 100cpm	0.67 [ 0.53- 0.85]	Hours	<0.001	0.97 [ 0.95-0.98]	0.86 [ 0.78-0.91]	TRUE
6	Sedentary time	LFE, Triano, 180min, Vertical, 150cpm	LFE, Triano, 90min, Vertical, 100cpm	0.67 [ 0.54- 0.91]	Hours	<0.001	0.98 [ 0.96-0.99]	0.83 [ 0.75-0.89]	TRUE
6	Sedentary time	Standard, Triano, 30min, Vertical, 200cpm	Standard, Zeros, 60min, VM, 200cpm	0.67 [-0.13- 1.38]	Hours	0.448	0.45 [ 0.17-0.66]	0.37 [ 0.13-0.57]	TRUE
6	Sedentary time	LFE, Choi, 180min, Vertical, 150cpm	Standard, Triano, 60min, Vertical, 100cpm	0.68 [ 0.26- 1.08]	Hours	<0.001	0.90 [ 0.82-0.95]	0.76 [ 0.64-0.85]	TRUE
6	Sedentary time	Standard, Choi, 180min, VM, 200cpm	Standard, Zeros, 180min, VM, 100cpm	0.68 [ 0.41- 1.06]	Hours	<0.001	0.95 [ 0.90-0.97]	0.83 [ 0.74-0.89]	TRUE
6	Sedentary time	LFE, Triano, 60min, VM, 150cpm	LFE, Zeros, 30min, VM, 100cpm	0.68 [ 0.43- 0.89]	Hours	<0.001	0.98 [ 0.95-0.99]	0.88 [ 0.81-0.92]	TRUE
6	Sedentary time	LFE, Triano, 90min, Vertical, 200cpm	LFE, Zeros, 30min, Vertical, 150cpm	0.68 [ 0.46- 0.87]	Hours	<0.001	0.97 [ 0.94-0.98]	0.86 [ 0.78-0.91]	TRUE
6	Sedentary time	Standard, Choi, 180min, Vertical, 150cpm	Standard, Zeros, 60min, Vertical, 100cpm	0.68 [ 0.53- 0.88]	Hours	<0.001	0.97 [ 0.94-0.98]	0.85 [ 0.77-0.90]	TRUE
6	Sedentary time	LFE, Triano, 30min, Vertical, 100cpm	Standard, Choi, 90min, VM, 100cpm	0.68 [-0.14- 1.48]	Hours	0.586	0.59 [ 0.34-0.76]	0.50 [ 0.28-0.68]	TRUE
6	Sedentary time	Standard, Choi, 180min, VM, 150cpm	Standard, Zeros, 30min, VM, 150cpm	0.69 [ 0.34- 1.04]	Hours	<0.001	0.89 [ 0.80-0.94]	0.75 [ 0.62-0.84]	TRUE
6	Sedentary time	Standard, Choi, 180min, VM, 100cpm	Standard, Zeros, 30min, VM, 100cpm	0.69 [ 0.34- 1.05]	Hours	<0.001	0.89 [ 0.81-0.94]	0.75 [ 0.62-0.84]	TRUE
6	Sedentary time	Standard, Choi, 180min, VM, 200cpm	Standard, Zeros, 30min, VM, 200cpm	0.69 [ 0.35- 1.04]	Hours	<0.001	0.89 [ 0.80-0.94]	0.75 [ 0.61-0.84]	TRUE
6	Sedentary time	LFE, Zeros, 60min, Vertical, 200cpm	Standard, Triano, 90min, Vertical, 100cpm	0.69 [ 0.45- 0.86]	Hours	<0.001	0.96 [ 0.93-0.98]	0.85 [ 0.77-0.91]	TRUE
6	Sedentary time	LFE, Zeros, 90min, VM, 200cpm	Standard, Zeros, 60min, VM, 100cpm	0.69 [ 0.45- 0.89]	Hours	<0.001	0.98 [ 0.96-0.99]	0.86 [ 0.79-0.91]	TRUE
6	Sedentary time	LFE, Choi, 180min, Vertical, 150cpm	LFE, Triano, 180min, Vertical, 100cpm	0.69 [ 0.47- 0.88]	Hours	<0.001	0.97 [ 0.95-0.98]	0.86 [ 0.78-0.91]	TRUE
6	Sedentary time	LFE, Zeros, 30min, Vertical, 200cpm	LFE, Zeros, 60min, Vertical, 100cpm	0.69 [ 0.50- 1.01]	Hours	<0.001	0.96 [ 0.92-0.98]	0.84 [ 0.75-0.90]	TRUE
6	Sedentary time	LFE, Zeros, 30min, VM, 200cpm	Standard, Zeros, 30min, VM, 100cpm	0.69 [ 0.51- 1.00]	Hours	<0.001	0.97 [ 0.95-0.98]	0.83 [ 0.74-0.89]	TRUE
6	Sedentary time	Standard, Zeros, 180min, VM, 150cpm	Standard, Zeros, 90min, VM, 100cpm	0.69 [ 0.52- 0.98]	Hours	<0.001	0.96 [ 0.92-0.98]	0.81 [ 0.72-0.88]	TRUE
6	Sedentary time	LFE, Choi, 180min, VM, 150cpm	LFE, Triano, 180min, VM, 100cpm	0.69 [ 0.57- 0.93]	Hours	<0.001	0.97 [ 0.94-0.98]	0.85 [ 0.77-0.90]	TRUE
6	Sedentary time	LFE, Triano, 30min, Vertical, 200cpm	Standard, Choi, 180min, VM, 200cpm	0.69 [-0.01- 1.27]	Hours	0.604	0.60 [ 0.37-0.77]	0.54 [ 0.31-0.71]	TRUE
6	Sedentary time	LFE, Triano, 30min, Vertical, 150cpm	Standard, Choi, 90min, VM, 150cpm	0.69 [-0.21- 1.43]	Hours	<0.001	0.61 [ 0.37-0.77]	0.52 [ 0.30-0.69]	TRUE
6	Sedentary time	LFE, Triano, 90min, Vertical, 100cpm	Standard, Triano, 180min, VM, 200cpm	0.70 [ 0.28- 1.06]	Hours	<0.001	0.89 [ 0.80-0.94]	0.77 [ 0.64-0.86]	TRUE
6	Sedentary time	LFE, Choi, 90min, Vertical, 100cpm	Standard, Choi, 180min, VM, 200cpm	0.70 [ 0.31- 1.22]	Hours	<0.001	0.90 [ 0.83-0.95]	0.78 [ 0.66-0.86]	TRUE
6	Sedentary time	LFE, Triano, 180min, Vertical, 200cpm	LFE, Zeros, 180min, Vertical, 100cpm	0.70 [ 0.37- 1.00]	Hours	<0.001	0.93 [ 0.87-0.96]	0.82 [ 0.72-0.89]	TRUE
6	Sedentary time	LFE, Zeros, 30min, Vertical, 200cpm	Standard, Triano, 60min, Vertical, 100cpm	0.70 [ 0.38- 0.99]	Hours	<0.001	0.95 [ 0.90-0.97]	0.81 [ 0.71-0.88]	TRUE
6	Sedentary time	LFE, Choi, 180min, VM, 150cpm	Standard, Zeros, 30min, VM, 100cpm	0.70 [ 0.39- 1.07]	Hours	<0.001	0.89 [ 0.81-0.94]	0.76 [ 0.63-0.84]	TRUE
6	Sedentary time	LFE, Zeros, 90min, Vertical, 150cpm	Standard, Zeros, 30min, Vertical, 100cpm	0.70 [ 0.43- 1.10]	Hours	<0.001	0.89 [ 0.80-0.94]	0.74 [ 0.60-0.83]	TRUE
6	Sedentary time	LFE, Triano, 90min, VM, 200cpm	LFE, Zeros, 30min, VM, 150cpm	0.70 [ 0.45- 0.90]	Hours	<0.001	0.97 [ 0.94-0.98]	0.85 [ 0.78-0.91]	TRUE
6	Sedentary time	LFE, Choi, 90min, VM, 200cpm	Standard, Triano, 90min, VM, 100cpm	0.70 [ 0.47- 0.91]	Hours	<0.001	0.98 [ 0.95-0.99]	0.86 [ 0.79-0.91]	TRUE
6	Sedentary time	Standard, Choi, 180min, VM, 150cpm	Standard, Zeros, 60min, VM, 100cpm	0.70 [ 0.50- 0.95]	Hours	<0.001	0.96 [ 0.93-0.98]	0.83 [ 0.75-0.89]	TRUE
6	Sedentary time	Standard, Triano, 90min, Vertical, 200cpm	Standard, Zeros, 30min, Vertical, 150cpm	0.70 [ 0.50- 0.98]	Hours	<0.001	0.92 [ 0.86-0.96]	0.77 [ 0.65-0.85]	TRUE
6	Sedentary time	LFE, Choi, 90min, Vertical, 150cpm	LFE, Triano, 90min, Vertical, 100cpm	0.70 [ 0.51- 0.93]	Hours	<0.001	0.98 [ 0.96-0.99]	0.86 [ 0.78-0.91]	TRUE
6	Sedentary time	LFE, Triano, 60min, VM, 200cpm	Standard, Zeros, 30min, VM, 100cpm	0.70 [ 0.53- 0.94]	Hours	<0.001	0.94 [ 0.90-0.97]	0.80 [ 0.70-0.87]	TRUE
6	Sedentary time	LFE, Zeros, 30min, Vertical, 200cpm	Standard, Zeros, 30min, Vertical, 100cpm	0.70 [ 0.53- 1.01]	Hours	<0.001	0.97 [ 0.94-0.98]	0.83 [ 0.75-0.89]	TRUE
6	Sedentary time	LFE, Triano, 180min, Vertical, 200cpm	Standard, Triano, 90min, Vertical, 100cpm	0.70 [ 0.54- 1.00]	Hours	<0.001	0.97 [ 0.94-0.98]	0.83 [ 0.74-0.89]	TRUE
6	Sedentary time	LFE, Zeros, 180min, Vertical, 150cpm	LFE, Zeros, 90min, Vertical, 100cpm	0.70 [ 0.55- 1.05]	Hours	<0.001	0.95 [ 0.91-0.97]	0.78 [ 0.68-0.86]	TRUE
6	Sedentary time	LFE, Choi, 90min, VM, 150cpm	LFE, Triano, 90min, VM, 100cpm	0.70 [ 0.62- 0.93]	Hours	<0.001	0.98 [ 0.96-0.99]	0.86 [ 0.78-0.91]	TRUE
6	Sedentary time	LFE, Zeros, 60min, VM, 150cpm	Standard, Triano, 30min, VM, 200cpm	0.70 [-0.06- 1.67]	Hours	<0.001	0.62 [ 0.39-0.78]	0.43 [ 0.24-0.59]	TRUE
6	Sedentary time	LFE, Triano, 60min, VM, 200cpm	LFE, Zeros, 90min, VM, 100cpm	0.71 [ 0.15- 1.03]	Hours	<0.001	0.91 [ 0.84-0.95]	0.83 [ 0.73-0.90]	TRUE
6	Sedentary time	LFE, Choi, 90min, Vertical, 200cpm	LFE, Zeros, 180min, Vertical, 100cpm	0.71 [ 0.26- 1.00]	Hours	<0.001	0.92 [ 0.86-0.96]	0.83 [ 0.72-0.89]	TRUE
6	Sedentary time	Standard, Zeros, 180min, Vertical, 200cpm	Standard, Zeros, 60min, Vertical, 150cpm	0.71 [ 0.49- 1.24]	Hours	<0.001	0.96 [ 0.92-0.98]	0.80 [ 0.70-0.87]	TRUE
6	Sedentary time	Standard, Zeros, 180min, Vertical, 150cpm	Standard, Zeros, 90min, Vertical, 100cpm	0.71 [ 0.52- 0.97]	Hours	<0.001	0.96 [ 0.93-0.98]	0.82 [ 0.73-0.88]	TRUE
6	Sedentary time	LFE, Triano, 60min, VM, 100cpm	Standard, Triano, 30min, VM, 100cpm	0.71 [-0.03- 1.37]	Hours	<0.001	0.72 [ 0.53-0.84]	0.53 [ 0.35-0.68]	TRUE
6	Sedentary time	LFE, Triano, 30min, Vertical, 200cpm	Standard, Zeros, 90min, VM, 200cpm	0.71 [-0.16- 1.30]	Hours	0.605	0.60 [ 0.37-0.77]	0.54 [ 0.32-0.71]	TRUE
6	Sedentary time	LFE, Triano, 30min, Vertical, 150cpm	Standard, Triano, 180min, VM, 150cpm	0.72 [ 0.04- 1.31]	Hours	0.549	0.55 [ 0.29-0.73]	0.48 [ 0.25-0.66]	TRUE
6	Sedentary time	LFE, Choi, 90min, VM, 150cpm	Standard, Triano, 30min, VM, 200cpm	0.72 [ 0.05- 1.62]	Hours	<0.001	0.61 [ 0.37-0.77]	0.41 [ 0.23-0.57]	TRUE
6	Sedentary time	LFE, Triano, 60min, Vertical, 150cpm	Standard, Zeros, 180min, VM, 200cpm	0.72 [ 0.08- 1.29]	Hours	<0.001	0.78 [ 0.62-0.88]	0.68 [ 0.50-0.80]	TRUE
6	Sedentary time	LFE, Triano, 180min, VM, 150cpm	Standard, Triano, 30min, VM, 200cpm	0.72 [ 0.19- 1.61]	Hours	<0.001	0.58 [ 0.34-0.75]	0.39 [ 0.20-0.55]	TRUE
6	Sedentary time	Standard, Triano, 60min, VM, 200cpm	Standard, Triano, 90min, VM, 100cpm	0.72 [ 0.23- 1.00]	Hours	<0.001	0.91 [ 0.85-0.95]	0.81 [ 0.70-0.88]	TRUE
6	Sedentary time	LFE, Zeros, 90min, VM, 150cpm	Standard, Triano, 60min, VM, 100cpm	0.72 [ 0.37- 1.14]	Hours	<0.001	0.93 [ 0.87-0.96]	0.79 [ 0.68-0.86]	TRUE
6	Sedentary time	LFE, Triano, 180min, VM, 200cpm	Standard, Triano, 90min, VM, 100cpm	0.72 [ 0.50- 0.96]	Hours	<0.001	0.97 [ 0.95-0.99]	0.85 [ 0.77-0.90]	TRUE
6	Sedentary time	LFE, Zeros, 180min, VM, 200cpm	Standard, Choi, 180min, VM, 100cpm	0.72 [ 0.51- 0.88]	Hours	<0.001	0.97 [ 0.95-0.98]	0.84 [ 0.76-0.90]	TRUE
6	Sedentary time	LFE, Choi, 180min, VM, 150cpm	LFE, Choi, 90min, VM, 100cpm	0.72 [ 0.54- 0.94]	Hours	<0.001	0.98 [ 0.96-0.99]	0.85 [ 0.78-0.90]	TRUE
6	Sedentary time	LFE, Choi, 180min, Vertical, 150cpm	LFE, Zeros, 60min, Vertical, 100cpm	0.72 [ 0.55- 0.86]	Hours	<0.001	0.97 [ 0.95-0.98]	0.83 [ 0.75-0.89]	TRUE
6	Sedentary time	LFE, Choi, 90min, VM, 200cpm	LFE, Zeros, 180min, VM, 100cpm	0.73 [ 0.35- 1.20]	Hours	<0.001	0.90 [ 0.82-0.95]	0.81 [ 0.69-0.88]	TRUE
6	Sedentary time	LFE, Triano, 60min, Vertical, 200cpm	LFE, Zeros, 60min, Vertical, 100cpm	0.73 [ 0.41- 1.03]	Hours	<0.001	0.95 [ 0.90-0.97]	0.82 [ 0.73-0.89]	TRUE
6	Sedentary time	LFE, Choi, 90min, Vertical, 100cpm	Standard, Zeros, 90min, VM, 200cpm	0.73 [ 0.45- 1.09]	Hours	<0.001	0.92 [ 0.85-0.95]	0.79 [ 0.67-0.87]	TRUE
6	Sedentary time	Standard, Zeros, 180min, VM, 200cpm	Standard, Zeros, 60min, VM, 150cpm	0.73 [ 0.49- 1.20]	Hours	<0.001	0.95 [ 0.91-0.97]	0.79 [ 0.68-0.86]	TRUE
6	Sedentary time	LFE, Choi, 90min, Vertical, 200cpm	LFE, Zeros, 30min, Vertical, 150cpm	0.73 [ 0.61- 0.93]	Hours	<0.001	0.97 [ 0.94-0.98]	0.82 [ 0.73-0.88]	TRUE
6	Sedentary time	LFE, Triano, 30min, Vertical, 200cpm	Standard, Zeros, 180min, VM, 150cpm	0.73 [-0.02- 1.60]	Hours	<0.001	0.51 [ 0.24-0.70]	0.43 [ 0.19-0.62]	TRUE
6	Sedentary time	LFE, Triano, 30min, Vertical, 100cpm	Standard, Triano, 60min, VM, 150cpm	0.74 [ 0.11- 1.23]	Hours	<0.001	0.71 [ 0.52-0.83]	0.60 [ 0.41-0.75]	TRUE
6	Sedentary time	Standard, Triano, 180min, Vertical, 100cpm	Standard, Triano, 30min, Vertical, 200cpm	0.74 [ 0.22- 1.68]	Hours	<0.001	0.60 [ 0.36-0.76]	0.43 [ 0.23-0.60]	TRUE
6	Sedentary time	Standard, Triano, 60min, Vertical, 200cpm	Standard, Triano, 90min, Vertical, 100cpm	0.74 [ 0.23- 0.97]	Hours	<0.001	0.92 [ 0.85-0.95]	0.82 [ 0.72-0.89]	TRUE
6	Sedentary time	LFE, Zeros, 60min, Vertical, 100cpm	Standard, Choi, 180min, VM, 200cpm	0.74 [ 0.25- 1.25]	Hours	<0.001	0.87 [ 0.77-0.93]	0.76 [ 0.62-0.85]	TRUE
6	Sedentary time	Standard, Triano, 90min, Vertical, 100cpm	Standard, Zeros, 180min, VM, 200cpm	0.74 [ 0.30- 1.40]	Hours	<0.001	0.80 [ 0.65-0.89]	0.66 [ 0.49-0.78]	TRUE
6	Sedentary time	Standard, Choi, 90min, Vertical, 150cpm	Standard, Triano, 90min, Vertical, 100cpm	0.74 [ 0.49- 0.94]	Hours	<0.001	0.98 [ 0.96-0.99]	0.83 [ 0.75-0.89]	TRUE
6	Sedentary time	Standard, Zeros, 60min, Vertical, 200cpm	Standard, Zeros, 90min, Vertical, 100cpm	0.74 [ 0.49- 1.03]	Hours	<0.001	0.97 [ 0.94-0.98]	0.84 [ 0.76-0.90]	TRUE
6	Sedentary time	LFE, Triano, 180min, Vertical, 200cpm	LFE, Zeros, 30min, Vertical, 150cpm	0.74 [ 0.55- 1.00]	Hours	<0.001	0.95 [ 0.92-0.98]	0.79 [ 0.68-0.86]	TRUE
6	Sedentary time	LFE, Choi, 90min, Vertical, 200cpm	LFE, Triano, 60min, Vertical, 150cpm	0.74 [ 0.58- 1.00]	Hours	<0.001	0.96 [ 0.92-0.98]	0.79 [ 0.69-0.86]	TRUE
6	Sedentary time	Standard, Choi, 90min, Vertical, 100cpm	Standard, Triano, 30min, Vertical, 200cpm	0.74 [-0.06- 1.70]	Hours	<0.001	0.63 [ 0.40-0.78]	0.47 [ 0.27-0.63]	TRUE
6	Sedentary time	LFE, Triano, 30min, Vertical, 100cpm	LFE, Zeros, 180min, VM, 100cpm	0.74 [-0.09- 1.54]	Hours	<0.001	0.43 [ 0.14-0.65]	0.34 [ 0.10-0.54]	TRUE
6	Sedentary time	LFE, Choi, 90min, Vertical, 150cpm	Standard, Triano, 30min, Vertical, 200cpm	0.75 [ 0.02- 1.54]	Hours	<0.001	0.59 [ 0.35-0.76]	0.44 [ 0.23-0.60]	TRUE
6	Sedentary time	LFE, Triano, 30min, Vertical, 150cpm	LFE, Zeros, 180min, VM, 150cpm	0.75 [ 0.02- 1.56]	Hours	<0.001	0.44 [ 0.16-0.66]	0.36 [ 0.12-0.56]	TRUE
6	Sedentary time	Standard, Triano, 30min, Vertical, 150cpm	Standard, Triano, 90min, VM, 150cpm	0.75 [ 0.05- 1.55]	Hours	0.383	0.38 [ 0.09-0.61]	0.30 [ 0.06-0.50]	TRUE
6	Sedentary time	LFE, Zeros, 90min, Vertical, 150cpm	Standard, Triano, 60min, Vertical, 100cpm	0.75 [ 0.26- 1.12]	Hours	<0.001	0.90 [ 0.83-0.95]	0.75 [ 0.63-0.84]	TRUE
6	Sedentary time	LFE, Triano, 180min, Vertical, 150cpm	Standard, Triano, 30min, Vertical, 200cpm	0.75 [ 0.26- 1.60]	Hours	<0.001	0.57 [ 0.33-0.75]	0.41 [ 0.21-0.58]	TRUE
6	Sedentary time	LFE, Zeros, 30min, Vertical, 100cpm	Standard, Triano, 90min, VM, 200cpm	0.75 [ 0.27- 1.26]	Hours	<0.001	0.83 [ 0.71-0.91]	0.71 [ 0.55-0.81]	TRUE
6	Sedentary time	Standard, Zeros, 30min, Vertical, 100cpm	Standard, Zeros, 90min, VM, 200cpm	0.75 [ 0.28- 1.28]	Hours	<0.001	0.73 [ 0.55-0.85]	0.65 [ 0.46-0.78]	TRUE
6	Sedentary time	LFE, Choi, 90min, Vertical, 100cpm	Standard, Zeros, 180min, VM, 150cpm	0.75 [ 0.37- 1.30]	Hours	<0.001	0.84 [ 0.72-0.91]	0.68 [ 0.53-0.80]	TRUE
6	Sedentary time	Standard, Choi, 180min, Vertical, 200cpm	Standard, Zeros, 180min, Vertical, 100cpm	0.75 [ 0.45- 0.99]	Hours	<0.001	0.96 [ 0.92-0.98]	0.84 [ 0.76-0.90]	TRUE
6	Sedentary time	LFE, Zeros, 90min, VM, 150cpm	Standard, Zeros, 30min, VM, 100cpm	0.75 [ 0.50- 1.06]	Hours	<0.001	0.89 [ 0.81-0.94]	0.75 [ 0.62-0.84]	TRUE
6	Sedentary time	Standard, Triano, 90min, VM, 200cpm	Standard, Zeros, 30min, VM, 150cpm	0.75 [ 0.51- 1.01]	Hours	<0.001	0.92 [ 0.86-0.96]	0.76 [ 0.64-0.84]	TRUE
6	Sedentary time	Standard, Choi, 90min, VM, 150cpm	Standard, Triano, 90min, VM, 100cpm	0.75 [ 0.55- 1.02]	Hours	<0.001	0.97 [ 0.95-0.98]	0.83 [ 0.75-0.89]	TRUE
6	Sedentary time	LFE, Triano, 90min, Vertical, 150cpm	Standard, Triano, 30min, Vertical, 200cpm	0.75 [-0.19- 1.47]	Hours	<0.001	0.59 [ 0.34-0.76]	0.46 [ 0.25-0.63]	TRUE
6	Sedentary time	LFE, Triano, 30min, Vertical, 200cpm	Standard, Triano, 180min, VM, 200cpm	0.76 [ 0.12- 1.34]	Hours	<0.001	0.57 [ 0.32-0.74]	0.49 [ 0.26-0.67]	TRUE
6	Sedentary time	LFE, Triano, 60min, Vertical, 100cpm	Standard, Triano, 90min, VM, 200cpm	0.76 [ 0.15- 1.24]	Hours	<0.001	0.87 [ 0.76-0.93]	0.73 [ 0.59-0.83]	TRUE
6	Sedentary time	LFE, Zeros, 60min, Vertical, 100cpm	Standard, Zeros, 90min, VM, 200cpm	0.76 [ 0.25- 1.24]	Hours	<0.001	0.89 [ 0.80-0.94]	0.77 [ 0.65-0.86]	TRUE
6	Sedentary time	Standard, Choi, 180min, Vertical, 100cpm	Standard, Triano, 30min, Vertical, 200cpm	0.76 [ 0.35- 1.70]	Hours	<0.001	0.61 [ 0.38-0.77]	0.43 [ 0.23-0.59]	TRUE
6	Sedentary time	LFE, Choi, 180min, Vertical, 150cpm	Standard, Triano, 30min, Vertical, 200cpm	0.76 [ 0.39- 1.75]	Hours	<0.001	0.60 [ 0.36-0.77]	0.41 [ 0.22-0.58]	TRUE
6	Sedentary time	LFE, Triano, 180min, VM, 200cpm	LFE, Zeros, 180min, VM, 100cpm	0.76 [ 0.44- 1.14]	Hours	<0.001	0.92 [ 0.85-0.95]	0.81 [ 0.69-0.88]	TRUE
6	Sedentary time	Standard, Choi, 180min, Vertical, 200cpm	Standard, Triano, 90min, Vertical, 150cpm	0.76 [ 0.46- 1.05]	Hours	<0.001	0.96 [ 0.93-0.98]	0.82 [ 0.73-0.88]	TRUE
6	Sedentary time	LFE, Choi, 180min, Vertical, 200cpm	Standard, Triano, 90min, Vertical, 100cpm	0.76 [ 0.55- 1.08]	Hours	<0.001	0.95 [ 0.92-0.98]	0.79 [ 0.69-0.86]	TRUE
6	Sedentary time	Standard, Choi, 90min, Vertical, 200cpm	Standard, Zeros, 90min, Vertical, 100cpm	0.76 [ 0.62- 1.03]	Hours	<0.001	0.98 [ 0.97-0.99]	0.84 [ 0.76-0.89]	TRUE
6	Sedentary time	Standard, Choi, 180min, VM, 200cpm	Standard, Triano, 90min, VM, 150cpm	0.77 [ 0.41- 1.07]	Hours	<0.001	0.95 [ 0.91-0.97]	0.81 [ 0.71-0.88]	TRUE
6	Sedentary time	LFE, Triano, 90min, Vertical, 200cpm	LFE, Zeros, 90min, Vertical, 100cpm	0.77 [ 0.43- 1.03]	Hours	<0.001	0.96 [ 0.92-0.98]	0.83 [ 0.74-0.89]	TRUE
6	Sedentary time	LFE, Zeros, 180min, Vertical, 200cpm	Standard, Triano, 180min, Vertical, 100cpm	0.77 [ 0.54- 1.17]	Hours	<0.001	0.95 [ 0.91-0.97]	0.78 [ 0.67-0.85]	TRUE
6	Sedentary time	LFE, Choi, 180min, Vertical, 200cpm	LFE, Zeros, 180min, Vertical, 100cpm	0.77 [ 0.55- 1.08]	Hours	<0.001	0.94 [ 0.89-0.97]	0.80 [ 0.70-0.88]	TRUE
6	Sedentary time	Standard, Triano, 180min, Vertical, 150cpm	Standard, Triano, 90min, Vertical, 100cpm	0.77 [ 0.58- 1.13]	Hours	<0.001	0.97 [ 0.94-0.98]	0.80 [ 0.70-0.87]	TRUE
6	Sedentary time	LFE, Choi, 90min, VM, 200cpm	LFE, Triano, 60min, VM, 150cpm	0.77 [ 0.59- 0.97]	Hours	<0.001	0.96 [ 0.93-0.98]	0.80 [ 0.71-0.87]	TRUE
6	Sedentary time	LFE, Triano, 180min, VM, 150cpm	LFE, Triano, 90min, VM, 100cpm	0.77 [ 0.62- 0.99]	Hours	<0.001	0.98 [ 0.96-0.99]	0.84 [ 0.76-0.89]	TRUE
6	Sedentary time	LFE, Triano, 180min, Vertical, 200cpm	LFE, Triano, 60min, Vertical, 150cpm	0.77 [ 0.62- 1.06]	Hours	<0.001	0.95 [ 0.92-0.98]	0.77 [ 0.66-0.85]	TRUE
6	Sedentary time	LFE, Zeros, 30min, VM, 150cpm	Standard, Triano, 30min, VM, 150cpm	0.78 [ 0.03- 1.79]	Hours	<0.001	0.69 [ 0.49-0.82]	0.47 [ 0.29-0.62]	TRUE
6	Sedentary time	LFE, Zeros, 180min, Vertical, 200cpm	Standard, Choi, 90min, Vertical, 100cpm	0.78 [ 0.43- 1.23]	Hours	<0.001	0.94 [ 0.90-0.97]	0.77 [ 0.66-0.85]	TRUE
6	Sedentary time	LFE, Choi, 180min, VM, 150cpm	LFE, Zeros, 60min, VM, 100cpm	0.78 [ 0.58- 0.97]	Hours	<0.001	0.97 [ 0.94-0.98]	0.83 [ 0.74-0.89]	TRUE
6	Sedentary time	LFE, Zeros, 90min, Vertical, 200cpm	Standard, Triano, 90min, Vertical, 100cpm	0.78 [ 0.62- 1.16]	Hours	<0.001	0.96 [ 0.93-0.98]	0.79 [ 0.69-0.86]	TRUE
6	Sedentary time	LFE, Zeros, 180min, VM, 150cpm	LFE, Zeros, 90min, VM, 100cpm	0.78 [ 0.62- 1.19]	Hours	<0.001	0.95 [ 0.92-0.98]	0.79 [ 0.69-0.86]	TRUE
6	Sedentary time	Standard, Triano, 30min, Vertical, 150cpm	Standard, Triano, 60min, VM, 200cpm	0.79 [ 0.08- 1.38]	Hours	<0.001	0.54 [ 0.28-0.72]	0.43 [ 0.20-0.61]	TRUE
6	Sedentary time	LFE, Choi, 180min, Vertical, 150cpm	LFE, Triano, 30min, Vertical, 200cpm	0.79 [ 0.29- 1.35]	Hours	<0.001	0.80 [ 0.65-0.89]	0.63 [ 0.46-0.75]	TRUE
6	Sedentary time	LFE, Choi, 180min, VM, 150cpm	LFE, Triano, 30min, VM, 200cpm	0.79 [ 0.42- 1.43]	Hours	<0.001	0.80 [ 0.65-0.89]	0.61 [ 0.44-0.73]	TRUE
6	Sedentary time	LFE, Zeros, 30min, VM, 200cpm	LFE, Zeros, 60min, VM, 100cpm	0.79 [ 0.53- 1.04]	Hours	<0.001	0.93 [ 0.88-0.96]	0.80 [ 0.69-0.87]	TRUE
6	Sedentary time	Standard, Triano, 180min, VM, 150cpm	Standard, Triano, 90min, VM, 100cpm	0.79 [ 0.62- 1.06]	Hours	<0.001	0.97 [ 0.95-0.99]	0.81 [ 0.72-0.87]	TRUE
6	Sedentary time	LFE, Choi, 90min, VM, 200cpm	LFE, Zeros, 30min, VM, 150cpm	0.79 [ 0.64- 0.98]	Hours	<0.001	0.97 [ 0.95-0.99]	0.82 [ 0.73-0.88]	TRUE
6	Sedentary time	LFE, Triano, 30min, Vertical, 150cpm	Standard, Zeros, 180min, VM, 100cpm	0.80 [ 0.07- 1.58]	Hours	<0.001	0.47 [ 0.19-0.68]	0.38 [ 0.14-0.57]	TRUE
6	Sedentary time	LFE, Zeros, 30min, Vertical, 100cpm	Standard, Triano, 30min, Vertical, 100cpm	0.80 [ 0.09- 1.76]	Hours	<0.001	0.69 [ 0.49-0.82]	0.47 [ 0.29-0.62]	TRUE
6	Sedentary time	LFE, Choi, 90min, Vertical, 100cpm	Standard, Triano, 180min, VM, 200cpm	0.80 [ 0.46- 1.32]	Hours	<0.001	0.89 [ 0.81-0.94]	0.74 [ 0.60-0.83]	TRUE
6	Sedentary time	Standard, Zeros, 60min, VM, 200cpm	Standard, Zeros, 90min, VM, 100cpm	0.80 [ 0.51- 1.12]	Hours	<0.001	0.95 [ 0.91-0.97]	0.82 [ 0.73-0.89]	TRUE
6	Sedentary time	LFE, Zeros, 180min, VM, 200cpm	Standard, Triano, 180min, VM, 100cpm	0.80 [ 0.54- 1.05]	Hours	<0.001	0.96 [ 0.92-0.98]	0.80 [ 0.70-0.87]	TRUE
6	Sedentary time	LFE, Zeros, 180min, Vertical, 200cpm	LFE, Zeros, 60min, Vertical, 150cpm	0.80 [ 0.55- 1.22]	Hours	<0.001	0.95 [ 0.91-0.97]	0.76 [ 0.65-0.84]	TRUE
6	Sedentary time	LFE, Triano, 180min, VM, 200cpm	LFE, Triano, 60min, VM, 150cpm	0.80 [ 0.58- 1.22]	Hours	<0.001	0.96 [ 0.93-0.98]	0.78 [ 0.68-0.86]	TRUE
6	Sedentary time	LFE, Zeros, 180min, VM, 200cpm	Standard, Choi, 90min, VM, 100cpm	0.80 [ 0.60- 1.12]	Hours	<0.001	0.95 [ 0.90-0.97]	0.78 [ 0.67-0.86]	TRUE
6	Sedentary time	LFE, Triano, 30min, Vertical, 200cpm	Standard, Choi, 90min, VM, 200cpm	0.80 [-0.01- 1.52]	Hours	<0.001	0.62 [ 0.39-0.78]	0.53 [ 0.31-0.69]	TRUE
6	Sedentary time	LFE, Zeros, 60min, Vertical, 150cpm	Standard, Triano, 30min, Vertical, 200cpm	0.80 [-0.07- 1.57]	Hours	<0.001	0.64 [ 0.41-0.79]	0.48 [ 0.28-0.64]	TRUE
6	Sedentary time	Standard, Triano, 30min, Vertical, 200cpm	Standard, Zeros, 180min, VM, 150cpm	0.80 [-0.44- 1.31]	Hours	0.303	0.30 [ 0.00-0.56]	0.26 [ 0.00-0.48]	TRUE
6	Sedentary time	Standard, Triano, 30min, Vertical, 200cpm	Standard, Triano, 90min, VM, 200cpm	0.81 [ 0.02- 1.55]	Hours	<0.001	0.39 [ 0.10-0.62]	0.30 [ 0.07-0.51]	TRUE
6	Sedentary time	Standard, Choi, 180min, VM, 100cpm	Standard, Triano, 30min, VM, 200cpm	0.81 [ 0.22- 1.75]	Hours	<0.001	0.61 [ 0.38-0.77]	0.39 [ 0.21-0.54]	TRUE
6	Sedentary time	LFE, Zeros, 60min, Vertical, 100cpm	Standard, Triano, 180min, VM, 200cpm	0.81 [ 0.27- 1.35]	Hours	<0.001	0.86 [ 0.74-0.92]	0.72 [ 0.57-0.82]	TRUE
6	Sedentary time	LFE, Choi, 180min, Vertical, 100cpm	Standard, Choi, 180min, VM, 200cpm	0.81 [ 0.50- 1.28]	Hours	<0.001	0.92 [ 0.85-0.95]	0.75 [ 0.62-0.83]	TRUE
6	Sedentary time	LFE, Choi, 180min, VM, 200cpm	Standard, Triano, 90min, VM, 100cpm	0.81 [ 0.51- 1.13]	Hours	<0.001	0.96 [ 0.93-0.98]	0.80 [ 0.71-0.87]	TRUE
6	Sedentary time	LFE, Zeros, 60min, Vertical, 150cpm	Standard, Zeros, 180min, VM, 200cpm	0.81 [ 0.51- 1.63]	Hours	<0.001	0.81 [ 0.67-0.89]	0.62 [ 0.46-0.75]	TRUE
6	Sedentary time	LFE, Choi, 180min, Vertical, 200cpm	LFE, Zeros, 30min, Vertical, 150cpm	0.81 [ 0.66- 1.14]	Hours	<0.001	0.95 [ 0.92-0.98]	0.76 [ 0.66-0.84]	TRUE
6	Sedentary time	Standard, Choi, 90min, VM, 100cpm	Standard, Triano, 30min, VM, 200cpm	0.81 [-0.05- 1.64]	Hours	<0.001	0.62 [ 0.38-0.77]	0.42 [ 0.23-0.58]	TRUE
6	Sedentary time	Standard, Triano, 30min, Vertical, 100cpm	Standard, Triano, 90min, VM, 100cpm	0.82 [ 0.00- 1.66]	Hours	0.369	0.37 [ 0.07-0.61]	0.28 [ 0.05-0.49]	TRUE
6	Sedentary time	LFE, Triano, 30min, Vertical, 100cpm	Standard, Zeros, 30min, VM, 150cpm	0.82 [ 0.26- 1.28]	Hours	<0.001	0.82 [ 0.69-0.90]	0.68 [ 0.52-0.80]	TRUE
6	Sedentary time	Standard, Triano, 30min, Vertical, 150cpm	Standard, Zeros, 30min, VM, 200cpm	0.82 [ 0.28- 1.38]	Hours	<0.001	0.60 [ 0.37-0.77]	0.47 [ 0.26-0.63]	TRUE
6	Sedentary time	LFE, Triano, 30min, Vertical, 150cpm	Standard, Triano, 60min, VM, 200cpm	0.82 [ 0.37- 1.40]	Hours	<0.001	0.72 [ 0.54-0.84]	0.56 [ 0.38-0.71]	TRUE
6	Sedentary time	LFE, Choi, 90min, Vertical, 100cpm	LFE, Zeros, 180min, VM, 200cpm	0.82 [ 0.37- 1.54]	Hours	<0.001	0.80 [ 0.66-0.89]	0.64 [ 0.47-0.76]	TRUE
6	Sedentary time	LFE, Triano, 90min, Vertical, 100cpm	Standard, Zeros, 60min, VM, 200cpm	0.82 [ 0.48- 1.13]	Hours	<0.001	0.91 [ 0.85-0.95]	0.76 [ 0.64-0.85]	TRUE
6	Sedentary time	Standard, Triano, 90min, Vertical, 200cpm	Standard, Zeros, 60min, Vertical, 100cpm	0.82 [ 0.51- 1.11]	Hours	<0.001	0.96 [ 0.92-0.98]	0.81 [ 0.71-0.88]	TRUE
6	Sedentary time	Standard, Choi, 90min, VM, 200cpm	Standard, Zeros, 90min, VM, 100cpm	0.82 [ 0.55- 1.09]	Hours	<0.001	0.97 [ 0.94-0.98]	0.82 [ 0.73-0.88]	TRUE
6	Sedentary time	Standard, Choi, 90min, VM, 200cpm	Standard, Triano, 60min, VM, 150cpm	0.82 [ 0.64- 1.41]	Hours	<0.001	0.94 [ 0.89-0.97]	0.70 [ 0.58-0.80]	TRUE
6	Sedentary time	LFE, Triano, 90min, VM, 100cpm	Standard, Triano, 30min, VM, 100cpm	0.83 [ 0.07- 1.70]	Hours	<0.001	0.67 [ 0.46-0.81]	0.44 [ 0.26-0.59]	TRUE
6	Sedentary time	LFE, Zeros, 30min, Vertical, 100cpm	Standard, Choi, 180min, VM, 150cpm	0.83 [ 0.30- 1.38]	Hours	<0.001	0.80 [ 0.66-0.89]	0.68 [ 0.51-0.80]	TRUE
6	Sedentary time	LFE, Triano, 90min, Vertical, 150cpm	Standard, Zeros, 180min, VM, 200cpm	0.83 [ 0.38- 1.42]	Hours	<0.001	0.82 [ 0.68-0.90]	0.65 [ 0.49-0.77]	TRUE
6	Sedentary time	LFE, Triano, 180min, Vertical, 100cpm	Standard, Zeros, 90min, VM, 200cpm	0.83 [ 0.41- 1.20]	Hours	<0.001	0.89 [ 0.81-0.94]	0.75 [ 0.62-0.84]	TRUE
6	Sedentary time	LFE, Choi, 180min, Vertical, 150cpm	LFE, Triano, 90min, Vertical, 100cpm	0.83 [ 0.55- 1.03]	Hours	<0.001	0.96 [ 0.92-0.98]	0.79 [ 0.69-0.86]	TRUE
6	Sedentary time	LFE, Triano, 90min, Vertical, 150cpm	LFE, Zeros, 30min, Vertical, 100cpm	0.83 [ 0.56- 1.01]	Hours	<0.001	0.97 [ 0.94-0.98]	0.81 [ 0.72-0.88]	TRUE
6	Sedentary time	LFE, Triano, 90min, Vertical, 200cpm	Standard, Zeros, 30min, Vertical, 100cpm	0.83 [ 0.57- 1.25]	Hours	<0.001	0.91 [ 0.84-0.95]	0.71 [ 0.58-0.81]	TRUE
6	Sedentary time	LFE, Triano, 90min, VM, 200cpm	Standard, Triano, 60min, VM, 100cpm	0.83 [ 0.61- 1.14]	Hours	<0.001	0.95 [ 0.90-0.97]	0.74 [ 0.63-0.83]	TRUE
6	Sedentary time	LFE, Triano, 180min, VM, 200cpm	LFE, Zeros, 30min, VM, 150cpm	0.83 [ 0.62- 1.09]	Hours	<0.001	0.96 [ 0.92-0.98]	0.79 [ 0.69-0.86]	TRUE
6	Sedentary time	LFE, Choi, 180min, Vertical, 200cpm	LFE, Triano, 60min, Vertical, 150cpm	0.83 [ 0.67- 1.16]	Hours	<0.001	0.94 [ 0.89-0.97]	0.74 [ 0.62-0.82]	TRUE
6	Sedentary time	Standard, Triano, 60min, Vertical, 100cpm	Standard, Zeros, 180min, VM, 150cpm	0.84 [ 0.15- 1.57]	Hours	<0.001	0.68 [ 0.47-0.81]	0.55 [ 0.35-0.70]	TRUE
6	Sedentary time	LFE, Zeros, 30min, Vertical, 200cpm	Standard, Triano, 30min, Vertical, 200cpm	0.84 [ 0.15- 1.73]	Hours	<0.001	0.71 [ 0.52-0.84]	0.50 [ 0.32-0.65]	TRUE
6	Sedentary time	Standard, Triano, 180min, VM, 100cpm	Standard, Triano, 30min, VM, 200cpm	0.84 [ 0.20- 1.66]	Hours	<0.001	0.58 [ 0.34-0.75]	0.39 [ 0.20-0.55]	TRUE
6	Sedentary time	LFE, Triano, 90min, Vertical, 100cpm	Standard, Choi, 90min, VM, 200cpm	0.84 [ 0.40- 1.05]	Hours	<0.001	0.91 [ 0.84-0.95]	0.78 [ 0.67-0.86]	TRUE
6	Sedentary time	LFE, Zeros, 180min, Vertical, 100cpm	Standard, Zeros, 180min, VM, 200cpm	0.84 [ 0.50- 1.30]	Hours	<0.001	0.90 [ 0.83-0.95]	0.72 [ 0.59-0.81]	TRUE
6	Sedentary time	LFE, Triano, 60min, Vertical, 200cpm	LFE, Triano, 90min, Vertical, 100cpm	0.84 [ 0.52- 1.13]	Hours	<0.001	0.95 [ 0.91-0.97]	0.80 [ 0.70-0.87]	TRUE
6	Sedentary time	LFE, Choi, 90min, Vertical, 100cpm	Standard, Choi, 90min, VM, 200cpm	0.84 [ 0.52- 1.28]	Hours	<0.001	0.92 [ 0.86-0.96]	0.76 [ 0.64-0.84]	TRUE
6	Sedentary time	Standard, Zeros, 180min, Vertical, 150cpm	Standard, Zeros, 60min, Vertical, 100cpm	0.84 [ 0.63- 1.32]	Hours	<0.001	0.95 [ 0.92-0.98]	0.75 [ 0.65-0.83]	TRUE
6	Sedentary time	LFE, Choi, 180min, VM, 150cpm	LFE, Triano, 90min, VM, 100cpm	0.84 [ 0.65- 1.21]	Hours	<0.001	0.96 [ 0.93-0.98]	0.80 [ 0.70-0.87]	TRUE
6	Sedentary time	LFE, Zeros, 30min, Vertical, 150cpm	Standard, Triano, 30min, Vertical, 150cpm	0.85 [ 0.13- 1.70]	Hours	<0.001	0.71 [ 0.51-0.83]	0.49 [ 0.31-0.64]	TRUE
6	Sedentary time	LFE, Triano, 60min, Vertical, 100cpm	Standard, Choi, 180min, VM, 150cpm	0.85 [ 0.30- 1.27]	Hours	<0.001	0.82 [ 0.69-0.90]	0.69 [ 0.53-0.80]	TRUE
6	Sedentary time	LFE, Choi, 180min, Vertical, 100cpm	Standard, Zeros, 90min, VM, 200cpm	0.85 [ 0.48- 1.30]	Hours	<0.001	0.90 [ 0.82-0.95]	0.73 [ 0.60-0.82]	TRUE
6	Sedentary time	Standard, Triano, 90min, VM, 200cpm	Standard, Zeros, 60min, VM, 100cpm	0.85 [ 0.51- 1.08]	Hours	<0.001	0.95 [ 0.92-0.98]	0.80 [ 0.70-0.87]	TRUE
6	Sedentary time	LFE, Zeros, 180min, VM, 200cpm	LFE, Zeros, 60min, VM, 150cpm	0.85 [ 0.58- 1.27]	Hours	<0.001	0.95 [ 0.90-0.97]	0.76 [ 0.65-0.84]	TRUE
6	Sedentary time	LFE, Zeros, 90min, VM, 200cpm	Standard, Triano, 90min, VM, 100cpm	0.85 [ 0.62- 1.11]	Hours	<0.001	0.97 [ 0.95-0.99]	0.81 [ 0.72-0.87]	TRUE
6	Sedentary time	LFE, Choi, 90min, Vertical, 200cpm	LFE, Zeros, 90min, Vertical, 100cpm	0.85 [ 0.69- 1.04]	Hours	<0.001	0.97 [ 0.95-0.98]	0.80 [ 0.70-0.86]	TRUE
6	Sedentary time	LFE, Zeros, 30min, VM, 200cpm	Standard, Triano, 30min, VM, 200cpm	0.86 [ 0.19- 1.85]	Hours	<0.001	0.69 [ 0.48-0.82]	0.44 [ 0.27-0.59]	TRUE
6	Sedentary time	LFE, Triano, 60min, VM, 200cpm	LFE, Zeros, 60min, VM, 100cpm	0.86 [ 0.35- 1.10]	Hours	<0.001	0.93 [ 0.88-0.96]	0.80 [ 0.69-0.87]	TRUE
6	Sedentary time	LFE, Triano, 90min, VM, 200cpm	LFE, Zeros, 90min, VM, 100cpm	0.86 [ 0.37- 1.17]	Hours	<0.001	0.94 [ 0.90-0.97]	0.81 [ 0.71-0.88]	TRUE
6	Sedentary time	LFE, Triano, 180min, Vertical, 100cpm	Standard, Choi, 180min, VM, 200cpm	0.86 [ 0.40- 1.22]	Hours	<0.001	0.90 [ 0.81-0.94]	0.75 [ 0.62-0.84]	TRUE
6	Sedentary time	LFE, Choi, 180min, VM, 200cpm	LFE, Zeros, 180min, VM, 100cpm	0.86 [ 0.48- 1.22]	Hours	<0.001	0.93 [ 0.87-0.96]	0.79 [ 0.68-0.87]	TRUE
6	Sedentary time	LFE, Zeros, 60min, Vertical, 200cpm	LFE, Zeros, 90min, Vertical, 100cpm	0.86 [ 0.58- 1.06]	Hours	<0.001	0.96 [ 0.93-0.98]	0.81 [ 0.71-0.87]	TRUE
6	Sedentary time	Standard, Choi, 90min, Vertical, 200cpm	Standard, Triano, 60min, Vertical, 150cpm	0.86 [ 0.60- 1.34]	Hours	<0.001	0.94 [ 0.89-0.97]	0.72 [ 0.60-0.81]	TRUE
6	Sedentary time	LFE, Triano, 90min, VM, 150cpm	LFE, Zeros, 30min, VM, 100cpm	0.86 [ 0.61- 1.07]	Hours	<0.001	0.97 [ 0.94-0.98]	0.81 [ 0.72-0.87]	TRUE
6	Sedentary time	LFE, Triano, 180min, Vertical, 150cpm	LFE, Zeros, 30min, Vertical, 100cpm	0.86 [ 0.68- 1.18]	Hours	<0.001	0.95 [ 0.92-0.98]	0.74 [ 0.63-0.82]	TRUE
6	Sedentary time	Standard, Choi, 90min, Vertical, 200cpm	Standard, Zeros, 30min, Vertical, 150cpm	0.86 [ 0.69- 1.38]	Hours	<0.001	0.92 [ 0.85-0.96]	0.71 [ 0.58-0.81]	TRUE
6	Sedentary time	LFE, Choi, 90min, VM, 200cpm	Standard, Triano, 60min, VM, 100cpm	0.86 [ 0.70- 1.48]	Hours	<0.001	0.94 [ 0.89-0.97]	0.69 [ 0.57-0.79]	TRUE
6	Sedentary time	LFE, Choi, 90min, Vertical, 150cpm	LFE, Zeros, 30min, Vertical, 100cpm	0.86 [ 0.75- 1.08]	Hours	<0.001	0.97 [ 0.94-0.98]	0.78 [ 0.68-0.85]	TRUE
6	Sedentary time	LFE, Triano, 60min, VM, 150cpm	Standard, Triano, 30min, VM, 150cpm	0.86 [-0.02- 1.55]	Hours	<0.001	0.69 [ 0.50-0.82]	0.48 [ 0.30-0.63]	TRUE
6	Sedentary time	LFE, Triano, 30min, Vertical, 100cpm	Standard, Zeros, 60min, VM, 100cpm	0.86 [-0.07- 1.34]	Hours	<0.001	0.64 [ 0.41-0.79]	0.53 [ 0.32-0.70]	TRUE
6	Sedentary time	Standard, Triano, 30min, Vertical, 150cpm	Standard, Zeros, 180min, VM, 100cpm	0.86 [-0.49- 1.46]	Hours	0.286	0.29 [-0.02-0.54]	0.23 [-0.02-0.44]	TRUE
6	Sedentary time	LFE, Zeros, 90min, Vertical, 100cpm	Standard, Triano, 30min, Vertical, 150cpm	0.87 [ 0.07- 1.69]	Hours	<0.001	0.56 [ 0.31-0.74]	0.41 [ 0.20-0.58]	TRUE
6	Sedentary time	LFE, Zeros, 60min, Vertical, 100cpm	Standard, Choi, 90min, VM, 200cpm	0.87 [ 0.45- 1.29]	Hours	<0.001	0.89 [ 0.81-0.94]	0.74 [ 0.61-0.83]	TRUE
6	Sedentary time	LFE, Zeros, 90min, Vertical, 100cpm	Standard, Choi, 180min, VM, 200cpm	0.87 [ 0.54- 1.33]	Hours	<0.001	0.89 [ 0.81-0.94]	0.72 [ 0.58-0.81]	TRUE
6	Sedentary time	LFE, Triano, 90min, Vertical, 200cpm	Standard, Triano, 60min, Vertical, 100cpm	0.87 [ 0.59- 1.19]	Hours	<0.001	0.94 [ 0.88-0.96]	0.73 [ 0.60-0.81]	TRUE
6	Sedentary time	LFE, Choi, 180min, VM, 200cpm	LFE, Zeros, 30min, VM, 150cpm	0.87 [ 0.73- 1.22]	Hours	<0.001	0.95 [ 0.91-0.97]	0.76 [ 0.65-0.84]	TRUE
6	Sedentary time	LFE, Choi, 90min, Vertical, 150cpm	LFE, Triano, 60min, Vertical, 100cpm	0.87 [ 0.74- 1.11]	Hours	<0.001	0.96 [ 0.92-0.98]	0.75 [ 0.64-0.83]	TRUE
6	Sedentary time	LFE, Triano, 30min, Vertical, 100cpm	LFE, Zeros, 60min, VM, 150cpm	0.87 [-0.08- 1.25]	Hours	<0.001	0.59 [ 0.35-0.76]	0.50 [ 0.28-0.67]	TRUE
6	Sedentary time	Standard, Triano, 60min, Vertical, 100cpm	Standard, Zeros, 90min, VM, 200cpm	0.88 [ 0.08- 1.23]	Hours	<0.001	0.76 [ 0.59-0.86]	0.65 [ 0.47-0.78]	TRUE
6	Sedentary time	LFE, Zeros, 60min, Vertical, 100cpm	Standard, Zeros, 60min, VM, 200cpm	0.88 [ 0.50- 1.29]	Hours	<0.001	0.92 [ 0.85-0.95]	0.74 [ 0.61-0.83]	TRUE
6	Sedentary time	LFE, Zeros, 90min, Vertical, 100cpm	Standard, Zeros, 90min, VM, 200cpm	0.88 [ 0.52- 1.30]	Hours	<0.001	0.92 [ 0.85-0.96]	0.74 [ 0.61-0.83]	TRUE
6	Sedentary time	LFE, Choi, 180min, Vertical, 100cpm	Standard, Choi, 90min, VM, 200cpm	0.88 [ 0.55- 1.50]	Hours	<0.001	0.91 [ 0.84-0.95]	0.70 [ 0.57-0.80]	TRUE
6	Sedentary time	LFE, Triano, 60min, VM, 200cpm	LFE, Triano, 90min, VM, 100cpm	0.88 [ 0.69- 1.23]	Hours	<0.001	0.94 [ 0.90-0.97]	0.78 [ 0.67-0.85]	TRUE
6	Sedentary time	LFE, Triano, 30min, Vertical, 100cpm	LFE, Triano, 90min, VM, 150cpm	0.88 [-0.02- 1.53]	Hours	<0.001	0.56 [ 0.31-0.74]	0.46 [ 0.24-0.64]	TRUE
6	Sedentary time	Standard, Triano, 30min, Vertical, 200cpm	Standard, Zeros, 90min, VM, 150cpm	0.89 [ 0.04- 1.63]	Hours	<0.001	0.34 [ 0.04-0.58]	0.26 [ 0.03-0.46]	TRUE
6	Sedentary time	LFE, Triano, 60min, Vertical, 100cpm	Standard, Zeros, 90min, VM, 150cpm	0.89 [ 0.24- 1.30]	Hours	<0.001	0.83 [ 0.70-0.90]	0.69 [ 0.54-0.81]	TRUE
6	Sedentary time	LFE, Choi, 90min, VM, 100cpm	Standard, Triano, 30min, VM, 100cpm	0.89 [ 0.25- 1.76]	Hours	<0.001	0.68 [ 0.47-0.82]	0.41 [ 0.25-0.56]	TRUE
6	Sedentary time	LFE, Triano, 60min, Vertical, 100cpm	LFE, Zeros, 90min, VM, 200cpm	0.89 [ 0.31- 1.40]	Hours	<0.001	0.79 [ 0.64-0.88]	0.65 [ 0.48-0.77]	TRUE
6	Sedentary time	LFE, Triano, 180min, Vertical, 100cpm	Standard, Triano, 180min, VM, 200cpm	0.89 [ 0.49- 1.29]	Hours	<0.001	0.90 [ 0.82-0.95]	0.72 [ 0.59-0.82]	TRUE
6	Sedentary time	LFE, Zeros, 180min, Vertical, 200cpm	Standard, Zeros, 60min, Vertical, 100cpm	0.89 [ 0.53- 1.31]	Hours	<0.001	0.94 [ 0.90-0.97]	0.75 [ 0.63-0.83]	TRUE
6	Sedentary time	Standard, Choi, 180min, Vertical, 150cpm	Standard, Triano, 90min, Vertical, 100cpm	0.89 [ 0.57- 1.16]	Hours	<0.001	0.96 [ 0.92-0.98]	0.77 [ 0.67-0.85]	TRUE
6	Sedentary time	LFE, Triano, 90min, VM, 150cpm	Standard, Triano, 30min, VM, 150cpm	0.90 [ 0.17- 1.85]	Hours	<0.001	0.64 [ 0.41-0.79]	0.39 [ 0.21-0.53]	TRUE
6	Sedentary time	LFE, Zeros, 90min, VM, 150cpm	Standard, Triano, 30min, VM, 200cpm	0.90 [ 0.34- 1.83]	Hours	<0.001	0.59 [ 0.34-0.76]	0.37 [ 0.19-0.52]	TRUE
6	Sedentary time	LFE, Zeros, 30min, Vertical, 100cpm	Standard, Zeros, 180min, VM, 100cpm	0.90 [ 0.52- 1.74]	Hours	<0.001	0.71 [ 0.52-0.84]	0.54 [ 0.35-0.68]	TRUE
6	Sedentary time	LFE, Triano, 90min, VM, 200cpm	Standard, Zeros, 30min, VM, 100cpm	0.90 [ 0.55- 1.30]	Hours	<0.001	0.92 [ 0.86-0.96]	0.72 [ 0.59-0.81]	TRUE
6	Sedentary time	Standard, Triano, 180min, Vertical, 200cpm	Standard, Zeros, 90min, Vertical, 100cpm	0.90 [ 0.59- 1.09]	Hours	<0.001	0.97 [ 0.94-0.98]	0.79 [ 0.70-0.86]	TRUE
6	Sedentary time	Standard, Choi, 180min, VM, 150cpm	Standard, Triano, 90min, VM, 100cpm	0.90 [ 0.61- 1.24]	Hours	<0.001	0.95 [ 0.91-0.97]	0.77 [ 0.66-0.85]	TRUE
6	Sedentary time	LFE, Choi, 180min, VM, 200cpm	LFE, Triano, 60min, VM, 150cpm	0.90 [ 0.62- 1.42]	Hours	<0.001	0.95 [ 0.90-0.97]	0.74 [ 0.63-0.83]	TRUE
6	Sedentary time	LFE, Triano, 30min, VM, 200cpm	Standard, Triano, 30min, VM, 100cpm	0.90 [ 0.66- 1.41]	Hours	<0.001	0.85 [ 0.73-0.92]	0.53 [ 0.38-0.66]	TRUE
6	Sedentary time	LFE, Triano, 180min, Vertical, 150cpm	LFE, Triano, 60min, Vertical, 100cpm	0.90 [ 0.76- 1.21]	Hours	<0.001	0.95 [ 0.92-0.98]	0.73 [ 0.61-0.81]	TRUE
6	Sedentary time	LFE, Zeros, 180min, Vertical, 200cpm	Standard, Zeros, 30min, Vertical, 150cpm	0.91 [ 0.50- 1.30]	Hours	<0.001	0.86 [ 0.75-0.92]	0.66 [ 0.51-0.78]	TRUE
6	Sedentary time	LFE, Triano, 90min, Vertical, 100cpm	Standard, Triano, 90min, VM, 200cpm	0.91 [ 0.54- 1.46]	Hours	<0.001	0.90 [ 0.82-0.95]	0.69 [ 0.56-0.79]	TRUE
6	Sedentary time	LFE, Choi, 90min, Vertical, 150cpm	Standard, Zeros, 180min, VM, 200cpm	0.91 [ 0.55- 1.57]	Hours	<0.001	0.84 [ 0.72-0.91]	0.63 [ 0.48-0.75]	TRUE
6	Sedentary time	Standard, Triano, 90min, Vertical, 150cpm	Standard, Zeros, 30min, Vertical, 100cpm	0.91 [ 0.62- 1.11]	Hours	<0.001	0.92 [ 0.85-0.96]	0.72 [ 0.59-0.81]	TRUE
6	Sedentary time	LFE, Triano, 180min, Vertical, 200cpm	LFE, Zeros, 90min, Vertical, 100cpm	0.91 [ 0.66- 1.15]	Hours	<0.001	0.96 [ 0.93-0.98]	0.77 [ 0.66-0.84]	TRUE
6	Sedentary time	Standard, Triano, 90min, VM, 150cpm	Standard, Zeros, 30min, VM, 100cpm	0.91 [ 0.66- 1.24]	Hours	<0.001	0.93 [ 0.87-0.96]	0.71 [ 0.59-0.81]	TRUE
6	Sedentary time	Standard, Triano, 180min, VM, 200cpm	Standard, Triano, 60min, VM, 150cpm	0.91 [ 0.70- 1.35]	Hours	<0.001	0.92 [ 0.85-0.95]	0.66 [ 0.53-0.76]	TRUE
6	Sedentary time	LFE, Zeros, 60min, VM, 200cpm	Standard, Triano, 60min, VM, 100cpm	0.91 [ 0.75- 1.30]	Hours	<0.001	0.95 [ 0.91-0.97]	0.72 [ 0.60-0.80]	TRUE
6	Sedentary time	LFE, Triano, 30min, Vertical, 150cpm	Standard, Zeros, 60min, VM, 150cpm	0.91 [-0.08- 1.41]	Hours	<0.001	0.66 [ 0.44-0.80]	0.55 [ 0.35-0.71]	TRUE
6	Sedentary time	LFE, Triano, 180min, Vertical, 100cpm	Standard, Choi, 90min, VM, 200cpm	0.92 [ 0.52- 1.29]	Hours	<0.001	0.90 [ 0.82-0.95]	0.72 [ 0.59-0.81]	TRUE
6	Sedentary time	Standard, Choi, 90min, Vertical, 200cpm	Standard, Triano, 180min, Vertical, 100cpm	0.92 [ 0.61- 1.13]	Hours	<0.001	0.97 [ 0.94-0.98]	0.79 [ 0.69-0.86]	TRUE
6	Sedentary time	LFE, Choi, 90min, VM, 200cpm	LFE, Zeros, 90min, VM, 100cpm	0.92 [ 0.70- 1.24]	Hours	<0.001	0.96 [ 0.92-0.98]	0.78 [ 0.68-0.85]	TRUE
6	Sedentary time	Standard, Triano, 180min, VM, 200cpm	Standard, Zeros, 90min, VM, 100cpm	0.92 [ 0.71- 1.07]	Hours	<0.001	0.97 [ 0.94-0.98]	0.79 [ 0.69-0.86]	TRUE
6	Sedentary time	LFE, Choi, 90min, VM, 150cpm	LFE, Triano, 60min, VM, 100cpm	0.92 [ 0.72- 1.10]	Hours	<0.001	0.96 [ 0.92-0.98]	0.76 [ 0.65-0.83]	TRUE
6	Sedentary time	Standard, Triano, 30min, Vertical, 150cpm	Standard, Zeros, 90min, VM, 100cpm	0.93 [ 0.22- 1.94]	Hours	<0.001	0.31 [ 0.01-0.56]	0.22 [ 0.00-0.42]	TRUE
6	Sedentary time	LFE, Zeros, 30min, Vertical, 100cpm	Standard, Zeros, 90min, VM, 150cpm	0.93 [ 0.30- 1.29]	Hours	<0.001	0.82 [ 0.69-0.90]	0.70 [ 0.54-0.81]	TRUE
6	Sedentary time	LFE, Zeros, 180min, VM, 200cpm	Standard, Zeros, 60min, VM, 100cpm	0.93 [ 0.58- 1.24]	Hours	<0.001	0.95 [ 0.90-0.97]	0.76 [ 0.64-0.84]	TRUE
6	Sedentary time	LFE, Zeros, 180min, Vertical, 150cpm	LFE, Zeros, 60min, Vertical, 100cpm	0.93 [ 0.68- 1.37]	Hours	<0.001	0.95 [ 0.91-0.97]	0.71 [ 0.60-0.80]	TRUE
6	Sedentary time	LFE, Choi, 90min, Vertical, 200cpm	Standard, Zeros, 30min, Vertical, 100cpm	0.93 [ 0.71- 1.38]	Hours	<0.001	0.90 [ 0.82-0.95]	0.67 [ 0.53-0.77]	TRUE
6	Sedentary time	LFE, Zeros, 90min, Vertical, 100cpm	Standard, Choi, 90min, VM, 200cpm	0.93 [ 0.72- 1.43]	Hours	<0.001	0.91 [ 0.85-0.95]	0.69 [ 0.56-0.79]	TRUE
6	Sedentary time	LFE, Choi, 180min, Vertical, 150cpm	LFE, Zeros, 30min, Vertical, 100cpm	0.93 [ 0.79- 1.32]	Hours	<0.001	0.95 [ 0.92-0.98]	0.72 [ 0.60-0.80]	TRUE
6	Sedentary time	LFE, Zeros, 60min, VM, 100cpm	Standard, Triano, 30min, VM, 100cpm	0.94 [ 0.24- 1.73]	Hours	<0.001	0.69 [ 0.49-0.82]	0.43 [ 0.26-0.57]	TRUE
6	Sedentary time	LFE, Triano, 60min, Vertical, 100cpm	Standard, Triano, 180min, VM, 150cpm	0.94 [ 0.34- 1.42]	Hours	<0.001	0.81 [ 0.67-0.89]	0.65 [ 0.49-0.77]	TRUE
6	Sedentary time	LFE, Zeros, 180min, Vertical, 100cpm	Standard, Triano, 30min, Vertical, 150cpm	0.94 [ 0.50- 2.00]	Hours	<0.001	0.56 [ 0.31-0.74]	0.35 [ 0.16-0.51]	TRUE
6	Sedentary time	Standard, Zeros, 180min, Vertical, 200cpm	Standard, Zeros, 30min, Vertical, 200cpm	0.94 [ 0.54- 1.32]	Hours	<0.001	0.87 [ 0.78-0.93]	0.68 [ 0.53-0.79]	TRUE
6	Sedentary time	LFE, Zeros, 180min, VM, 200cpm	Standard, Zeros, 30min, VM, 150cpm	0.94 [ 0.56- 1.39]	Hours	<0.001	0.85 [ 0.73-0.91]	0.66 [ 0.50-0.77]	TRUE
6	Sedentary time	LFE, Zeros, 90min, Vertical, 100cpm	Standard, Triano, 180min, VM, 200cpm	0.94 [ 0.61- 1.37]	Hours	<0.001	0.89 [ 0.80-0.94]	0.68 [ 0.54-0.78]	TRUE
6	Sedentary time	Standard, Choi, 90min, VM, 200cpm	Standard, Triano, 180min, VM, 100cpm	0.94 [ 0.62- 1.25]	Hours	<0.001	0.95 [ 0.90-0.97]	0.77 [ 0.66-0.85]	TRUE
6	Sedentary time	LFE, Choi, 90min, Vertical, 100cpm	Standard, Zeros, 60min, VM, 200cpm	0.94 [ 0.62- 1.28]	Hours	<0.001	0.93 [ 0.86-0.96]	0.73 [ 0.61-0.82]	TRUE
6	Sedentary time	LFE, Zeros, 60min, Vertical, 200cpm	Standard, Zeros, 30min, Vertical, 100cpm	0.94 [ 0.69- 1.39]	Hours	<0.001	0.93 [ 0.87-0.96]	0.70 [ 0.57-0.80]	TRUE
6	Sedentary time	Standard, Choi, 90min, VM, 200cpm	Standard, Zeros, 30min, VM, 150cpm	0.94 [ 0.70- 1.33]	Hours	<0.001	0.92 [ 0.86-0.96]	0.69 [ 0.56-0.79]	TRUE
6	Sedentary time	LFE, Choi, 180min, Vertical, 200cpm	LFE, Zeros, 90min, Vertical, 100cpm	0.94 [ 0.75- 1.28]	Hours	<0.001	0.96 [ 0.92-0.98]	0.74 [ 0.63-0.82]	TRUE
6	Sedentary time	LFE, Triano, 30min, Vertical, 200cpm	Standard, Zeros, 60min, VM, 200cpm	0.95 [ 0.10- 1.47]	Hours	<0.001	0.68 [ 0.47-0.81]	0.56 [ 0.36-0.71]	TRUE
6	Sedentary time	LFE, Triano, 60min, Vertical, 100cpm	Standard, Choi, 90min, VM, 150cpm	0.95 [ 0.46- 1.38]	Hours	<0.001	0.85 [ 0.73-0.92]	0.67 [ 0.52-0.79]	TRUE
6	Sedentary time	LFE, Zeros, 60min, VM, 200cpm	LFE, Zeros, 90min, VM, 100cpm	0.95 [ 0.53- 1.27]	Hours	<0.001	0.95 [ 0.91-0.97]	0.79 [ 0.68-0.86]	TRUE
6	Sedentary time	Standard, Zeros, 180min, Vertical, 100cpm	Standard, Zeros, 30min, Vertical, 100cpm	0.95 [ 0.54- 1.32]	Hours	<0.001	0.87 [ 0.77-0.93]	0.67 [ 0.52-0.78]	TRUE
6	Sedentary time	Standard, Zeros, 180min, Vertical, 150cpm	Standard, Zeros, 30min, Vertical, 150cpm	0.95 [ 0.54- 1.32]	Hours	<0.001	0.87 [ 0.78-0.93]	0.68 [ 0.53-0.78]	TRUE
6	Sedentary time	Standard, Zeros, 30min, Vertical, 100cpm	Standard, Zeros, 60min, VM, 200cpm	0.95 [ 0.59- 1.33]	Hours	<0.001	0.79 [ 0.64-0.88]	0.65 [ 0.48-0.77]	TRUE
6	Sedentary time	Standard, Triano, 180min, Vertical, 200cpm	Standard, Zeros, 30min, Vertical, 150cpm	0.95 [ 0.67- 1.38]	Hours	<0.001	0.89 [ 0.80-0.94]	0.65 [ 0.51-0.76]	TRUE
6	Sedentary time	LFE, Choi, 90min, Vertical, 200cpm	Standard, Triano, 60min, Vertical, 100cpm	0.95 [ 0.70- 1.42]	Hours	<0.001	0.92 [ 0.86-0.96]	0.68 [ 0.54-0.77]	TRUE
6	Sedentary time	Standard, Triano, 180min, Vertical, 200cpm	Standard, Triano, 60min, Vertical, 150cpm	0.95 [ 0.71- 1.42]	Hours	<0.001	0.92 [ 0.85-0.95]	0.67 [ 0.54-0.77]	TRUE
6	Sedentary time	LFE, Choi, 90min, Vertical, 200cpm	LFE, Triano, 180min, Vertical, 100cpm	0.95 [ 0.72- 1.24]	Hours	<0.001	0.96 [ 0.93-0.98]	0.74 [ 0.63-0.82]	TRUE
6	Sedentary time	Standard, Choi, 90min, Vertical, 150cpm	Standard, Triano, 60min, Vertical, 100cpm	0.95 [ 0.75- 1.49]	Hours	<0.001	0.94 [ 0.89-0.97]	0.67 [ 0.54-0.77]	TRUE
6	Sedentary time	LFE, Triano, 30min, Vertical, 150cpm	LFE, Zeros, 60min, VM, 200cpm	0.95 [-0.04- 1.46]	Hours	<0.001	0.61 [ 0.37-0.77]	0.50 [ 0.28-0.66]	TRUE
6	Sedentary time	LFE, Zeros, 180min, Vertical, 200cpm	Standard, Triano, 60min, Vertical, 150cpm	0.96 [ 0.45- 1.40]	Hours	<0.001	0.88 [ 0.79-0.94]	0.68 [ 0.54-0.79]	TRUE
6	Sedentary time	Standard, Choi, 180min, Vertical, 200cpm	Standard, Zeros, 90min, Vertical, 100cpm	0.96 [ 0.70- 1.23]	Hours	<0.001	0.97 [ 0.94-0.98]	0.78 [ 0.68-0.85]	TRUE
6	Sedentary time	Standard, Choi, 180min, VM, 200cpm	Standard, Triano, 60min, VM, 150cpm	0.96 [ 0.73- 1.62]	Hours	<0.001	0.91 [ 0.84-0.95]	0.64 [ 0.50-0.74]	TRUE
6	Sedentary time	LFE, Zeros, 60min, Vertical, 200cpm	Standard, Triano, 60min, Vertical, 100cpm	0.96 [ 0.74- 1.38]	Hours	<0.001	0.94 [ 0.89-0.97]	0.70 [ 0.58-0.79]	TRUE
6	Sedentary time	LFE, Triano, 60min, Vertical, 200cpm	Standard, Triano, 30min, Vertical, 200cpm	0.97 [ 0.21- 1.72]	Hours	<0.001	0.68 [ 0.48-0.82]	0.48 [ 0.29-0.63]	TRUE
6	Sedentary time	LFE, Triano, 60min, Vertical, 100cpm	LFE, Zeros, 180min, VM, 150cpm	0.97 [ 0.26- 1.76]	Hours	<0.001	0.70 [ 0.51-0.83]	0.53 [ 0.34-0.68]	TRUE
6	Sedentary time	LFE, Choi, 180min, VM, 150cpm	Standard, Triano, 30min, VM, 200cpm	0.97 [ 0.32- 1.67]	Hours	<0.001	0.62 [ 0.39-0.78]	0.39 [ 0.22-0.55]	TRUE
6	Sedentary time	LFE, Zeros, 30min, Vertical, 100cpm	LFE, Zeros, 90min, VM, 200cpm	0.97 [ 0.34- 1.41]	Hours	<0.001	0.78 [ 0.62-0.88]	0.65 [ 0.47-0.77]	TRUE
6	Sedentary time	Standard, Choi, 90min, Vertical, 100cpm	Standard, Zeros, 180min, VM, 200cpm	0.97 [ 0.39- 1.61]	Hours	<0.001	0.82 [ 0.69-0.90]	0.63 [ 0.47-0.75]	TRUE
6	Sedentary time	LFE, Triano, 60min, Vertical, 150cpm	LFE, Zeros, 180min, VM, 200cpm	0.97 [ 0.45- 1.77]	Hours	<0.001	0.71 [ 0.52-0.83]	0.50 [ 0.32-0.65]	TRUE
6	Sedentary time	Standard, Zeros, 180min, VM, 150cpm	Standard, Zeros, 60min, VM, 100cpm	0.97 [ 0.65- 1.36]	Hours	<0.001	0.95 [ 0.91-0.97]	0.74 [ 0.63-0.83]	TRUE
6	Sedentary time	LFE, Choi, 180min, Vertical, 100cpm	Standard, Zeros, 60min, VM, 200cpm	0.97 [ 0.66- 1.55]	Hours	<0.001	0.91 [ 0.84-0.95]	0.68 [ 0.54-0.78]	TRUE
6	Sedentary time	Standard, Choi, 180min, VM, 200cpm	Standard, Zeros, 90min, VM, 100cpm	0.97 [ 0.68- 1.31]	Hours	<0.001	0.95 [ 0.91-0.97]	0.76 [ 0.65-0.84]	TRUE
6	Sedentary time	LFE, Choi, 180min, Vertical, 150cpm	LFE, Triano, 60min, Vertical, 100cpm	0.97 [ 0.80- 1.42]	Hours	<0.001	0.94 [ 0.89-0.97]	0.69 [ 0.57-0.78]	TRUE
6	Sedentary time	LFE, Triano, 60min, VM, 200cpm	Standard, Triano, 30min, VM, 200cpm	0.98 [ 0.12- 1.65]	Hours	<0.001	0.69 [ 0.49-0.82]	0.45 [ 0.27-0.60]	TRUE
6	Sedentary time	LFE, Triano, 30min, Vertical, 150cpm	LFE, Triano, 90min, VM, 200cpm	0.98 [ 0.17- 1.68]	Hours	<0.001	0.57 [ 0.33-0.75]	0.45 [ 0.23-0.62]	TRUE
6	Sedentary time	LFE, Triano, 60min, Vertical, 100cpm	Standard, Triano, 30min, Vertical, 100cpm	0.98 [ 0.18- 1.52]	Hours	<0.001	0.66 [ 0.45-0.80]	0.46 [ 0.27-0.61]	TRUE
6	Sedentary time	LFE, Triano, 30min, Vertical, 150cpm	Standard, Zeros, 30min, VM, 200cpm	0.98 [ 0.46- 1.36]	Hours	<0.001	0.82 [ 0.69-0.90]	0.64 [ 0.48-0.76]	TRUE
6	Sedentary time	LFE, Triano, 60min, Vertical, 150cpm	Standard, Choi, 180min, VM, 200cpm	0.98 [ 0.46- 1.42]	Hours	<0.001	0.82 [ 0.69-0.90]	0.64 [ 0.48-0.76]	TRUE
6	Sedentary time	LFE, Zeros, 30min, Vertical, 100cpm	Standard, Triano, 180min, VM, 150cpm	0.98 [ 0.49- 1.49]	Hours	<0.001	0.78 [ 0.63-0.88]	0.63 [ 0.46-0.76]	TRUE
6	Sedentary time	Standard, Zeros, 180min, VM, 100cpm	Standard, Zeros, 30min, VM, 100cpm	0.98 [ 0.53- 1.42]	Hours	<0.001	0.87 [ 0.77-0.93]	0.66 [ 0.51-0.77]	TRUE
6	Sedentary time	LFE, Zeros, 30min, Vertical, 100cpm	Standard, Choi, 90min, VM, 150cpm	0.98 [ 0.54- 1.42]	Hours	<0.001	0.83 [ 0.71-0.91]	0.67 [ 0.51-0.78]	TRUE
6	Sedentary time	Standard, Zeros, 180min, VM, 150cpm	Standard, Zeros, 30min, VM, 150cpm	0.98 [ 0.54- 1.43]	Hours	<0.001	0.86 [ 0.76-0.92]	0.65 [ 0.50-0.77]	TRUE
6	Sedentary time	Standard, Zeros, 180min, VM, 200cpm	Standard, Zeros, 30min, VM, 200cpm	0.98 [ 0.54- 1.44]	Hours	<0.001	0.86 [ 0.75-0.92]	0.65 [ 0.50-0.76]	TRUE
6	Sedentary time	LFE, Triano, 180min, VM, 200cpm	Standard, Triano, 60min, VM, 100cpm	0.98 [ 0.69- 1.40]	Hours	<0.001	0.92 [ 0.86-0.96]	0.66 [ 0.53-0.76]	TRUE
6	Sedentary time	Standard, Triano, 180min, VM, 200cpm	Standard, Zeros, 60min, VM, 100cpm	0.98 [ 0.83- 1.35]	Hours	<0.001	0.96 [ 0.92-0.98]	0.71 [ 0.60-0.80]	TRUE
6	Sedentary time	LFE, Choi, 90min, VM, 150cpm	Standard, Triano, 30min, VM, 150cpm	0.99 [ 0.47- 2.01]	Hours	<0.001	0.64 [ 0.42-0.79]	0.36 [ 0.20-0.50]	TRUE
6	Sedentary time	LFE, Zeros, 30min, Vertical, 100cpm	Standard, Zeros, 60min, VM, 150cpm	0.99 [ 0.56- 1.29]	Hours	<0.001	0.86 [ 0.76-0.92]	0.67 [ 0.52-0.78]	TRUE
6	Sedentary time	LFE, Choi, 90min, Vertical, 150cpm	LFE, Triano, 30min, Vertical, 150cpm	0.99 [ 0.64- 1.62]	Hours	<0.001	0.80 [ 0.66-0.89]	0.53 [ 0.37-0.66]	TRUE
6	Sedentary time	LFE, Choi, 90min, Vertical, 200cpm	LFE, Triano, 30min, Vertical, 200cpm	0.99 [ 0.64- 1.62]	Hours	<0.001	0.81 [ 0.67-0.89]	0.54 [ 0.38-0.67]	TRUE
6	Sedentary time	LFE, Triano, 180min, VM, 150cpm	LFE, Zeros, 30min, VM, 100cpm	0.99 [ 0.73- 1.25]	Hours	<0.001	0.96 [ 0.93-0.98]	0.75 [ 0.64-0.83]	TRUE
6	Sedentary time	Standard, Choi, 180min, Vertical, 200cpm	Standard, Triano, 60min, Vertical, 150cpm	0.99 [ 0.74- 1.47]	Hours	<0.001	0.92 [ 0.86-0.96]	0.66 [ 0.53-0.76]	TRUE
6	Sedentary time	LFE, Choi, 90min, VM, 150cpm	LFE, Zeros, 30min, VM, 100cpm	0.99 [ 0.76- 1.15]	Hours	<0.001	0.97 [ 0.95-0.98]	0.77 [ 0.67-0.84]	TRUE
6	Sedentary time	LFE, Choi, 180min, Vertical, 100cpm	Standard, Triano, 180min, VM, 200cpm	1.00 [ 0.53- 1.38]	Hours	<0.001	0.89 [ 0.81-0.94]	0.69 [ 0.55-0.79]	TRUE
6	Sedentary time	LFE, Triano, 180min, Vertical, 200cpm	Standard, Triano, 60min, Vertical, 100cpm	1.00 [ 0.67- 1.39]	Hours	<0.001	0.90 [ 0.83-0.95]	0.64 [ 0.50-0.75]	TRUE
6	Sedentary time	LFE, Triano, 90min, Vertical, 200cpm	LFE, Zeros, 60min, Vertical, 100cpm	1.00 [ 0.68- 1.17]	Hours	<0.001	0.96 [ 0.93-0.98]	0.77 [ 0.66-0.84]	TRUE
6	Sedentary time	LFE, Triano, 60min, Vertical, 150cpm	Standard, Triano, 30min, Vertical, 150cpm	1.01 [ 0.22- 1.58]	Hours	<0.001	0.68 [ 0.47-0.81]	0.48 [ 0.29-0.63]	TRUE
6	Sedentary time	LFE, Zeros, 180min, VM, 200cpm	Standard, Triano, 60min, VM, 150cpm	1.01 [ 0.44- 1.35]	Hours	<0.001	0.89 [ 0.81-0.94]	0.69 [ 0.56-0.79]	TRUE
6	Sedentary time	LFE, Triano, 180min, Vertical, 100cpm	Standard, Zeros, 180min, VM, 150cpm	1.01 [ 0.47- 1.39]	Hours	<0.001	0.84 [ 0.72-0.91]	0.66 [ 0.51-0.78]	TRUE
6	Sedentary time	LFE, Triano, 180min, VM, 100cpm	Standard, Triano, 30min, VM, 100cpm	1.01 [ 0.48- 1.74]	Hours	<0.001	0.66 [ 0.45-0.80]	0.39 [ 0.23-0.54]	TRUE
6	Sedentary time	LFE, Triano, 180min, Vertical, 100cpm	Standard, Zeros, 60min, VM, 200cpm	1.01 [ 0.56- 1.36]	Hours	<0.001	0.90 [ 0.82-0.95]	0.69 [ 0.56-0.79]	TRUE
6	Sedentary time	LFE, Choi, 90min, Vertical, 100cpm	LFE, Triano, 30min, Vertical, 100cpm	1.01 [ 0.64- 1.63]	Hours	<0.001	0.80 [ 0.66-0.89]	0.52 [ 0.36-0.65]	TRUE
6	Sedentary time	LFE, Triano, 60min, Vertical, 100cpm	Standard, Zeros, 60min, VM, 150cpm	1.01 [ 0.65- 1.35]	Hours	<0.001	0.87 [ 0.78-0.93]	0.67 [ 0.53-0.78]	TRUE
6	Sedentary time	LFE, Zeros, 30min, Vertical, 200cpm	Standard, Zeros, 180min, VM, 200cpm	1.01 [ 0.67- 1.86]	Hours	<0.001	0.74 [ 0.56-0.85]	0.53 [ 0.35-0.68]	TRUE
6	Sedentary time	LFE, Choi, 90min, VM, 200cpm	Standard, Zeros, 30min, VM, 100cpm	1.01 [ 0.72- 1.40]	Hours	<0.001	0.92 [ 0.85-0.95]	0.67 [ 0.54-0.77]	TRUE
6	Sedentary time	LFE, Triano, 180min, VM, 150cpm	LFE, Triano, 60min, VM, 100cpm	1.01 [ 0.74- 1.37]	Hours	<0.001	0.96 [ 0.93-0.98]	0.74 [ 0.63-0.82]	TRUE
6	Sedentary time	Standard, Choi, 90min, VM, 150cpm	Standard, Triano, 60min, VM, 100cpm	1.01 [ 0.78- 1.59]	Hours	<0.001	0.94 [ 0.89-0.97]	0.67 [ 0.54-0.76]	TRUE
6	Sedentary time	LFE, Triano, 30min, Vertical, 200cpm	Standard, Choi, 180min, VM, 150cpm	1.02 [ 0.34- 1.77]	Hours	<0.001	0.55 [ 0.30-0.73]	0.42 [ 0.21-0.60]	TRUE
6	Sedentary time	LFE, Triano, 60min, Vertical, 150cpm	Standard, Zeros, 90min, VM, 200cpm	1.02 [ 0.46- 1.36]	Hours	<0.001	0.83 [ 0.71-0.91]	0.65 [ 0.49-0.77]	TRUE
6	Sedentary time	LFE, Triano, 60min, Vertical, 200cpm	Standard, Zeros, 180min, VM, 200cpm	1.02 [ 0.52- 1.79]	Hours	<0.001	0.76 [ 0.59-0.86]	0.54 [ 0.36-0.68]	TRUE
6	Sedentary time	LFE, Triano, 90min, Vertical, 100cpm	Standard, Zeros, 90min, VM, 150cpm	1.02 [ 0.57- 1.40]	Hours	<0.001	0.88 [ 0.79-0.94]	0.68 [ 0.53-0.78]	TRUE
6	Sedentary time	LFE, Zeros, 30min, Vertical, 150cpm	Standard, Zeros, 180min, VM, 150cpm	1.02 [ 0.63- 1.74]	Hours	<0.001	0.73 [ 0.54-0.84]	0.54 [ 0.35-0.68]	TRUE
6	Sedentary time	Standard, Triano, 180min, VM, 200cpm	Standard, Zeros, 30min, VM, 150cpm	1.02 [ 0.66- 1.42]	Hours	<0.001	0.88 [ 0.79-0.94]	0.64 [ 0.49-0.75]	TRUE
6	Sedentary time	LFE, Zeros, 90min, Vertical, 100cpm	Standard, Zeros, 60min, VM, 200cpm	1.02 [ 0.77- 1.46]	Hours	<0.001	0.92 [ 0.86-0.96]	0.67 [ 0.54-0.77]	TRUE
6	Sedentary time	Standard, Choi, 180min, VM, 200cpm	Standard, Choi, 90min, VM, 100cpm	1.02 [ 0.81- 1.36]	Hours	<0.001	0.96 [ 0.93-0.98]	0.72 [ 0.61-0.81]	TRUE
6	Sedentary time	Standard, Choi, 90min, Vertical, 200cpm	Standard, Zeros, 60min, Vertical, 100cpm	1.02 [ 0.83- 1.20]	Hours	<0.001	0.98 [ 0.96-0.99]	0.77 [ 0.67-0.84]	TRUE
6	Sedentary time	Standard, Triano, 30min, Vertical, 200cpm	Standard, Zeros, 60min, VM, 150cpm	1.03 [ 0.31- 1.75]	Hours	<0.001	0.41 [ 0.12-0.63]	0.28 [ 0.07-0.46]	TRUE
6	Sedentary time	LFE, Triano, 60min, Vertical, 100cpm	Standard, Zeros, 180min, VM, 100cpm	1.03 [ 0.32- 1.82]	Hours	<0.001	0.74 [ 0.56-0.85]	0.55 [ 0.36-0.69]	TRUE
6	Sedentary time	LFE, Zeros, 30min, Vertical, 150cpm	Standard, Choi, 180min, VM, 200cpm	1.03 [ 0.52- 1.46]	Hours	<0.001	0.80 [ 0.66-0.89]	0.64 [ 0.47-0.76]	TRUE
6	Sedentary time	LFE, Zeros, 30min, Vertical, 150cpm	Standard, Zeros, 90min, VM, 200cpm	1.03 [ 0.52- 1.48]	Hours	<0.001	0.83 [ 0.70-0.90]	0.65 [ 0.49-0.77]	TRUE
6	Sedentary time	LFE, Zeros, 180min, Vertical, 150cpm	Standard, Triano, 60min, Vertical, 100cpm	1.03 [ 0.52- 1.55]	Hours	<0.001	0.88 [ 0.79-0.93]	0.64 [ 0.50-0.75]	TRUE
6	Sedentary time	LFE, Zeros, 30min, Vertical, 100cpm	Standard, Triano, 60min, VM, 200cpm	1.03 [ 0.64- 1.52]	Hours	<0.001	0.83 [ 0.71-0.91]	0.58 [ 0.42-0.70]	TRUE
6	Sedentary time	LFE, Choi, 180min, Vertical, 200cpm	Standard, Triano, 60min, Vertical, 100cpm	1.03 [ 0.75- 1.48]	Hours	<0.001	0.91 [ 0.83-0.95]	0.62 [ 0.48-0.73]	TRUE
6	Sedentary time	LFE, Zeros, 60min, VM, 200cpm	Standard, Zeros, 30min, VM, 100cpm	1.03 [ 0.76- 1.33]	Hours	<0.001	0.94 [ 0.89-0.97]	0.70 [ 0.58-0.79]	TRUE
6	Sedentary time	Standard, Triano, 60min, Vertical, 150cpm	Standard, Zeros, 180min, VM, 200cpm	1.04 [ 0.27- 1.72]	Hours	<0.001	0.67 [ 0.46-0.81]	0.51 [ 0.31-0.67]	TRUE
6	Sedentary time	LFE, Zeros, 60min, VM, 150cpm	Standard, Triano, 30min, VM, 150cpm	1.04 [ 0.30- 2.05]	Hours	<0.001	0.65 [ 0.44-0.80]	0.38 [ 0.21-0.52]	TRUE
6	Sedentary time	LFE, Triano, 30min, Vertical, 200cpm	LFE, Zeros, 90min, VM, 200cpm	1.04 [ 0.32- 1.89]	Hours	<0.001	0.50 [ 0.24-0.70]	0.37 [ 0.16-0.55]	TRUE
6	Sedentary time	LFE, Zeros, 180min, VM, 150cpm	Standard, Zeros, 30min, VM, 100cpm	1.04 [ 0.64- 1.49]	Hours	<0.001	0.86 [ 0.75-0.92]	0.64 [ 0.49-0.76]	TRUE
6	Sedentary time	LFE, Choi, 90min, VM, 200cpm	LFE, Triano, 30min, VM, 200cpm	1.04 [ 0.65- 1.67]	Hours	<0.001	0.82 [ 0.68-0.90]	0.52 [ 0.37-0.65]	TRUE
6	Sedentary time	Standard, Choi, 180min, VM, 200cpm	Standard, Triano, 180min, VM, 100cpm	1.04 [ 0.72- 1.38]	Hours	<0.001	0.94 [ 0.90-0.97]	0.72 [ 0.60-0.81]	TRUE
6	Sedentary time	LFE, Zeros, 180min, VM, 200cpm	Standard, Triano, 90min, VM, 100cpm	1.04 [ 0.73- 1.38]	Hours	<0.001	0.93 [ 0.88-0.96]	0.69 [ 0.56-0.79]	TRUE
6	Sedentary time	LFE, Triano, 90min, VM, 200cpm	LFE, Zeros, 60min, VM, 100cpm	1.04 [ 0.79- 1.27]	Hours	<0.001	0.95 [ 0.90-0.97]	0.75 [ 0.63-0.83]	TRUE
6	Sedentary time	Standard, Choi, 90min, VM, 200cpm	Standard, Zeros, 60min, VM, 100cpm	1.04 [ 0.80- 1.22]	Hours	<0.001	0.97 [ 0.94-0.98]	0.75 [ 0.65-0.83]	TRUE
6	Sedentary time	Standard, Choi, 90min, Vertical, 150cpm	Standard, Zeros, 30min, Vertical, 100cpm	1.04 [ 0.80- 1.59]	Hours	<0.001	0.92 [ 0.85-0.96]	0.67 [ 0.53-0.77]	TRUE
6	Sedentary time	Standard, Triano, 180min, VM, 150cpm	Standard, Triano, 60min, VM, 100cpm	1.04 [ 0.82- 1.55]	Hours	<0.001	0.92 [ 0.86-0.96]	0.63 [ 0.49-0.73]	TRUE
6	Sedentary time	Standard, Choi, 180min, Vertical, 200cpm	Standard, Choi, 90min, Vertical, 100cpm	1.04 [ 0.90- 1.30]	Hours	<0.001	0.97 [ 0.95-0.99]	0.74 [ 0.64-0.82]	TRUE
6	Sedentary time	LFE, Zeros, 90min, Vertical, 150cpm	Standard, Triano, 30min, Vertical, 200cpm	1.05 [ 0.31- 1.77]	Hours	<0.001	0.59 [ 0.35-0.76]	0.40 [ 0.20-0.56]	TRUE
6	Sedentary time	LFE, Triano, 60min, Vertical, 150cpm	Standard, Zeros, 180min, VM, 150cpm	1.05 [ 0.47- 1.85]	Hours	<0.001	0.75 [ 0.57-0.86]	0.55 [ 0.37-0.69]	TRUE
6	Sedentary time	LFE, Choi, 90min, VM, 100cpm	LFE, Triano, 30min, VM, 100cpm	1.05 [ 0.65- 1.64]	Hours	<0.001	0.85 [ 0.74-0.92]	0.55 [ 0.40-0.67]	TRUE
6	Sedentary time	LFE, Choi, 90min, VM, 150cpm	LFE, Triano, 30min, VM, 150cpm	1.05 [ 0.65- 1.65]	Hours	<0.001	0.83 [ 0.71-0.91]	0.54 [ 0.38-0.66]	TRUE
6	Sedentary time	LFE, Triano, 60min, Vertical, 100cpm	Standard, Triano, 60min, VM, 200cpm	1.05 [ 0.73- 1.44]	Hours	<0.001	0.87 [ 0.77-0.93]	0.60 [ 0.45-0.72]	TRUE
6	Sedentary time	LFE, Choi, 180min, VM, 150cpm	LFE, Triano, 60min, VM, 100cpm	1.05 [ 0.80- 1.63]	Hours	<0.001	0.95 [ 0.90-0.97]	0.70 [ 0.58-0.79]	TRUE
6	Sedentary time	LFE, Choi, 90min, Vertical, 200cpm	LFE, Zeros, 60min, Vertical, 100cpm	1.05 [ 0.85- 1.27]	Hours	<0.001	0.97 [ 0.95-0.99]	0.73 [ 0.63-0.81]	TRUE
6	Sedentary time	Standard, Choi, 180min, Vertical, 200cpm	Standard, Triano, 180min, Vertical, 100cpm	1.05 [ 0.87- 1.20]	Hours	<0.001	0.97 [ 0.94-0.98]	0.74 [ 0.63-0.82]	TRUE
6	Sedentary time	Standard, Triano, 60min, Vertical, 100cpm	Standard, Zeros, 60min, VM, 200cpm	1.06 [ 0.42- 1.28]	Hours	<0.001	0.81 [ 0.68-0.90]	0.64 [ 0.47-0.76]	TRUE
6	Sedentary time	LFE, Choi, 90min, Vertical, 100cpm	Standard, Triano, 90min, VM, 200cpm	1.06 [ 0.54- 1.63]	Hours	<0.001	0.89 [ 0.80-0.94]	0.65 [ 0.50-0.75]	TRUE
6	Sedentary time	LFE, Zeros, 180min, Vertical, 150cpm	Standard, Zeros, 30min, Vertical, 100cpm	1.06 [ 0.61- 1.42]	Hours	<0.001	0.85 [ 0.74-0.92]	0.63 [ 0.48-0.75]	TRUE
6	Sedentary time	LFE, Zeros, 180min, Vertical, 200cpm	LFE, Zeros, 30min, Vertical, 150cpm	1.06 [ 0.75- 1.59]	Hours	<0.001	0.92 [ 0.85-0.96]	0.64 [ 0.50-0.74]	TRUE
6	Sedentary time	Standard, Triano, 180min, Vertical, 200cpm	Standard, Zeros, 60min, Vertical, 100cpm	1.06 [ 0.83- 1.23]	Hours	<0.001	0.95 [ 0.92-0.98]	0.72 [ 0.60-0.81]	TRUE
6	Sedentary time	LFE, Zeros, 90min, Vertical, 100cpm	Standard, Zeros, 180min, VM, 150cpm	1.07 [ 0.56- 1.61]	Hours	<0.001	0.84 [ 0.72-0.91]	0.63 [ 0.48-0.75]	TRUE
6	Sedentary time	LFE, Zeros, 180min, VM, 150cpm	Standard, Triano, 60min, VM, 100cpm	1.07 [ 0.61- 1.47]	Hours	<0.001	0.91 [ 0.83-0.95]	0.69 [ 0.55-0.78]	TRUE
6	Sedentary time	LFE, Zeros, 180min, Vertical, 150cpm	Standard, Triano, 30min, Vertical, 200cpm	1.07 [ 0.61- 2.09]	Hours	<0.001	0.58 [ 0.34-0.75]	0.34 [ 0.16-0.49]	TRUE
6	Sedentary time	Standard, Choi, 180min, Vertical, 200cpm	Standard, Zeros, 30min, Vertical, 150cpm	1.07 [ 0.70- 1.43]	Hours	<0.001	0.90 [ 0.82-0.95]	0.65 [ 0.51-0.76]	TRUE
6	Sedentary time	LFE, Choi, 90min, VM, 200cpm	LFE, Triano, 180min, VM, 100cpm	1.07 [ 0.76- 1.37]	Hours	<0.001	0.95 [ 0.90-0.97]	0.73 [ 0.62-0.82]	TRUE
6	Sedentary time	LFE, Zeros, 180min, VM, 150cpm	LFE, Zeros, 60min, VM, 100cpm	1.07 [ 0.77- 1.42]	Hours	<0.001	0.95 [ 0.91-0.97]	0.72 [ 0.61-0.81]	TRUE
6	Sedentary time	LFE, Triano, 180min, Vertical, 100cpm	LFE, Zeros, 180min, VM, 200cpm	1.08 [ 0.50- 1.41]	Hours	<0.001	0.81 [ 0.66-0.89]	0.62 [ 0.45-0.74]	TRUE
6	Sedentary time	LFE, Zeros, 180min, VM, 100cpm	Standard, Triano, 30min, VM, 150cpm	1.08 [ 0.52- 1.68]	Hours	<0.001	0.61 [ 0.38-0.77]	0.38 [ 0.21-0.54]	TRUE
6	Sedentary time	LFE, Triano, 30min, Vertical, 200cpm	Standard, Triano, 30min, Vertical, 100cpm	1.08 [ 0.71- 1.53]	Hours	<0.001	0.86 [ 0.76-0.93]	0.53 [ 0.38-0.65]	TRUE
6	Sedentary time	LFE, Zeros, 30min, Vertical, 100cpm	Standard, Zeros, 30min, VM, 200cpm	1.08 [ 0.73- 1.65]	Hours	<0.001	0.89 [ 0.80-0.94]	0.62 [ 0.48-0.74]	TRUE
6	Sedentary time	LFE, Triano, 180min, Vertical, 200cpm	Standard, Zeros, 30min, Vertical, 100cpm	1.08 [ 0.75- 1.43]	Hours	<0.001	0.88 [ 0.79-0.94]	0.63 [ 0.49-0.74]	TRUE
6	Sedentary time	LFE, Triano, 180min, Vertical, 200cpm	LFE, Zeros, 60min, Vertical, 100cpm	1.08 [ 0.89- 1.24]	Hours	<0.001	0.96 [ 0.92-0.98]	0.70 [ 0.58-0.79]	TRUE
6	Sedentary time	Standard, Choi, 90min, VM, 150cpm	Standard, Zeros, 30min, VM, 100cpm	1.08 [ 0.89- 1.52]	Hours	<0.001	0.93 [ 0.87-0.96]	0.65 [ 0.52-0.75]	TRUE
6	Sedentary time	LFE, Zeros, 60min, Vertical, 100cpm	Standard, Triano, 90min, VM, 200cpm	1.09 [ 0.52- 1.66]	Hours	<0.001	0.86 [ 0.75-0.92]	0.63 [ 0.48-0.75]	TRUE
6	Sedentary time	LFE, Triano, 180min, VM, 200cpm	LFE, Zeros, 90min, VM, 100cpm	1.09 [ 0.66- 1.27]	Hours	<0.001	0.96 [ 0.92-0.98]	0.76 [ 0.65-0.84]	TRUE
6	Sedentary time	Standard, Choi, 180min, VM, 200cpm	Standard, Zeros, 30min, VM, 150cpm	1.09 [ 0.71- 1.53]	Hours	<0.001	0.90 [ 0.81-0.94]	0.63 [ 0.48-0.74]	TRUE
6	Sedentary time	LFE, Zeros, 180min, Vertical, 200cpm	Standard, Triano, 90min, Vertical, 100cpm	1.09 [ 0.74- 1.44]	Hours	<0.001	0.92 [ 0.86-0.96]	0.66 [ 0.53-0.76]	TRUE
6	Sedentary time	LFE, Choi, 180min, VM, 150cpm	LFE, Zeros, 30min, VM, 100cpm	1.09 [ 0.82- 1.29]	Hours	<0.001	0.95 [ 0.92-0.98]	0.71 [ 0.59-0.80]	TRUE
6	Sedentary time	LFE, Triano, 30min, Vertical, 100cpm	Standard, Triano, 90min, VM, 100cpm	1.10 [ 0.28- 1.60]	Hours	<0.001	0.58 [ 0.33-0.75]	0.46 [ 0.24-0.63]	TRUE
6	Sedentary time	LFE, Zeros, 30min, Vertical, 100cpm	LFE, Zeros, 60min, VM, 200cpm	1.10 [ 0.58- 1.49]	Hours	<0.001	0.83 [ 0.71-0.91]	0.63 [ 0.47-0.75]	TRUE
6	Sedentary time	LFE, Zeros, 60min, Vertical, 100cpm	Standard, Choi, 180min, VM, 150cpm	1.10 [ 0.65- 1.61]	Hours	<0.001	0.85 [ 0.74-0.92]	0.63 [ 0.48-0.75]	TRUE
6	Sedentary time	LFE, Triano, 60min, Vertical, 100cpm	LFE, Zeros, 60min, VM, 200cpm	1.10 [ 0.70- 1.43]	Hours	<0.001	0.84 [ 0.73-0.91]	0.63 [ 0.47-0.75]	TRUE
6	Sedentary time	LFE, Triano, 60min, Vertical, 200cpm	LFE, Zeros, 30min, Vertical, 100cpm	1.10 [ 0.74- 1.27]	Hours	<0.001	0.97 [ 0.94-0.98]	0.74 [ 0.63-0.82]	TRUE
6	Sedentary time	LFE, Triano, 180min, VM, 200cpm	Standard, Zeros, 30min, VM, 100cpm	1.10 [ 0.75- 1.44]	Hours	<0.001	0.89 [ 0.81-0.94]	0.64 [ 0.50-0.75]	TRUE
6	Sedentary time	LFE, Choi, 180min, VM, 200cpm	Standard, Triano, 60min, VM, 100cpm	1.10 [ 0.80- 1.55]	Hours	<0.001	0.92 [ 0.86-0.96]	0.64 [ 0.50-0.74]	TRUE
6	Sedentary time	LFE, Triano, 30min, Vertical, 200cpm	Standard, Zeros, 90min, VM, 150cpm	1.11 [ 0.17- 1.83]	Hours	<0.001	0.55 [ 0.30-0.73]	0.42 [ 0.20-0.59]	TRUE
6	Sedentary time	LFE, Triano, 90min, VM, 200cpm	Standard, Triano, 30min, VM, 200cpm	1.11 [ 0.29- 1.86]	Hours	<0.001	0.63 [ 0.40-0.78]	0.36 [ 0.19-0.50]	TRUE
6	Sedentary time	LFE, Triano, 30min, Vertical, 150cpm	LFE, Zeros, 90min, VM, 150cpm	1.11 [ 0.31- 1.82]	Hours	<0.001	0.48 [ 0.20-0.68]	0.35 [ 0.13-0.53]	TRUE
6	Sedentary time	LFE, Triano, 30min, Vertical, 100cpm	LFE, Triano, 60min, VM, 150cpm	1.11 [ 0.36- 1.57]	Hours	<0.001	0.63 [ 0.40-0.78]	0.46 [ 0.26-0.62]	TRUE
6	Sedentary time	LFE, Triano, 30min, Vertical, 150cpm	Standard, Triano, 90min, VM, 150cpm	1.11 [ 0.38- 1.69]	Hours	<0.001	0.60 [ 0.36-0.76]	0.47 [ 0.26-0.64]	TRUE
6	Sedentary time	LFE, Triano, 30min, Vertical, 200cpm	Standard, Triano, 90min, VM, 200cpm	1.11 [ 0.39- 1.66]	Hours	<0.001	0.62 [ 0.39-0.78]	0.47 [ 0.27-0.64]	TRUE
6	Sedentary time	LFE, Choi, 180min, Vertical, 100cpm	LFE, Zeros, 180min, VM, 200cpm	1.11 [ 0.46- 1.55]	Hours	<0.001	0.82 [ 0.69-0.90]	0.61 [ 0.45-0.73]	TRUE
6	Sedentary time	LFE, Triano, 90min, Vertical, 100cpm	LFE, Zeros, 90min, VM, 200cpm	1.11 [ 0.52- 1.53]	Hours	<0.001	0.85 [ 0.74-0.92]	0.64 [ 0.48-0.75]	TRUE
6	Sedentary time	Standard, Triano, 60min, Vertical, 200cpm	Standard, Zeros, 30min, Vertical, 100cpm	1.11 [ 0.67- 1.32]	Hours	<0.001	0.91 [ 0.84-0.95]	0.69 [ 0.56-0.79]	TRUE
6	Sedentary time	LFE, Triano, 60min, Vertical, 150cpm	Standard, Choi, 90min, VM, 200cpm	1.11 [ 0.69- 1.63]	Hours	<0.001	0.85 [ 0.74-0.92]	0.62 [ 0.47-0.74]	TRUE
6	Sedentary time	LFE, Triano, 180min, VM, 100cpm	LFE, Triano, 30min, VM, 100cpm	1.11 [ 0.70- 1.65]	Hours	<0.001	0.84 [ 0.72-0.91]	0.53 [ 0.38-0.66]	TRUE
6	Sedentary time	Standard, Choi, 180min, Vertical, 200cpm	Standard, Zeros, 60min, Vertical, 100cpm	1.11 [ 0.86- 1.33]	Hours	<0.001	0.96 [ 0.93-0.98]	0.71 [ 0.60-0.80]	TRUE
6	Sedentary time	Standard, Triano, 30min, Vertical, 150cpm	Standard, Triano, 60min, VM, 150cpm	1.12 [ 0.51- 1.74]	Hours	<0.001	0.49 [ 0.22-0.69]	0.31 [ 0.12-0.47]	TRUE
6	Sedentary time	LFE, Triano, 180min, VM, 150cpm	Standard, Triano, 30min, VM, 150cpm	1.12 [ 0.54- 1.94]	Hours	<0.001	0.62 [ 0.39-0.78]	0.34 [ 0.18-0.48]	TRUE
6	Sedentary time	LFE, Zeros, 30min, Vertical, 150cpm	Standard, Triano, 180min, VM, 200cpm	1.12 [ 0.63- 1.53]	Hours	<0.001	0.79 [ 0.64-0.88]	0.59 [ 0.42-0.72]	TRUE
6	Sedentary time	LFE, Triano, 90min, Vertical, 100cpm	Standard, Triano, 180min, VM, 150cpm	1.12 [ 0.63- 1.58]	Hours	<0.001	0.86 [ 0.76-0.92]	0.63 [ 0.48-0.74]	TRUE
6	Sedentary time	LFE, Triano, 180min, Vertical, 100cpm	Standard, Triano, 90min, VM, 200cpm	1.12 [ 0.70- 1.69]	Hours	<0.001	0.88 [ 0.78-0.93]	0.62 [ 0.47-0.73]	TRUE
6	Sedentary time	LFE, Choi, 90min, Vertical, 100cpm	Standard, Choi, 180min, VM, 150cpm	1.12 [ 0.71- 1.61]	Hours	<0.001	0.89 [ 0.80-0.94]	0.64 [ 0.50-0.75]	TRUE
6	Sedentary time	Standard, Triano, 60min, VM, 200cpm	Standard, Zeros, 30min, VM, 100cpm	1.12 [ 0.72- 1.33]	Hours	<0.001	0.93 [ 0.87-0.96]	0.68 [ 0.55-0.77]	TRUE
6	Sedentary time	Standard, Triano, 180min, Vertical, 150cpm	Standard, Zeros, 30min, Vertical, 100cpm	1.12 [ 0.77- 1.58]	Hours	<0.001	0.88 [ 0.79-0.93]	0.61 [ 0.46-0.72]	TRUE
6	Sedentary time	Standard, Triano, 180min, Vertical, 150cpm	Standard, Triano, 60min, Vertical, 100cpm	1.12 [ 0.82- 1.63]	Hours	<0.001	0.91 [ 0.84-0.95]	0.62 [ 0.48-0.73]	TRUE
6	Sedentary time	LFE, Triano, 30min, Vertical, 100cpm	LFE, Zeros, 30min, VM, 150cpm	1.13 [ 0.27- 1.62]	Hours	<0.001	0.67 [ 0.46-0.81]	0.49 [ 0.30-0.65]	TRUE
6	Sedentary time	Standard, Choi, 90min, VM, 100cpm	Standard, Triano, 30min, VM, 150cpm	1.13 [ 0.40- 1.98]	Hours	<0.001	0.65 [ 0.43-0.79]	0.36 [ 0.20-0.51]	TRUE
6	Sedentary time	Standard, Triano, 30min, Vertical, 100cpm	Standard, Triano, 60min, VM, 100cpm	1.13 [ 0.49- 1.94]	Hours	<0.001	0.47 [ 0.20-0.68]	0.29 [ 0.11-0.46]	TRUE
6	Sedentary time	LFE, Zeros, 90min, VM, 100cpm	Standard, Triano, 30min, VM, 100cpm	1.13 [ 0.61- 1.98]	Hours	<0.001	0.67 [ 0.45-0.81]	0.37 [ 0.21-0.51]	TRUE
6	Sedentary time	LFE, Triano, 180min, VM, 150cpm	LFE, Triano, 30min, VM, 150cpm	1.13 [ 0.75- 1.66]	Hours	<0.001	0.82 [ 0.68-0.90]	0.51 [ 0.36-0.64]	TRUE
6	Sedentary time	Standard, Triano, 180min, VM, 150cpm	Standard, Zeros, 30min, VM, 100cpm	1.13 [ 0.84- 1.61]	Hours	<0.001	0.89 [ 0.81-0.94]	0.60 [ 0.46-0.71]	TRUE
6	Sedentary time	Standard, Choi, 180min, VM, 150cpm	Standard, Triano, 60min, VM, 100cpm	1.13 [ 0.86- 1.74]	Hours	<0.001	0.92 [ 0.85-0.96]	0.60 [ 0.47-0.71]	TRUE
6	Sedentary time	LFE, Choi, 180min, Vertical, 200cpm	LFE, Choi, 90min, Vertical, 100cpm	1.13 [ 0.88- 1.37]	Hours	<0.001	0.96 [ 0.93-0.98]	0.70 [ 0.58-0.79]	TRUE
6	Sedentary time	LFE, Choi, 180min, Vertical, 100cpm	Standard, Zeros, 180min, VM, 150cpm	1.14 [ 0.49- 1.40]	Hours	<0.001	0.86 [ 0.75-0.92]	0.65 [ 0.50-0.77]	TRUE
6	Sedentary time	LFE, Triano, 90min, Vertical, 100cpm	Standard, Choi, 180min, VM, 150cpm	1.14 [ 0.51- 1.40]	Hours	<0.001	0.87 [ 0.77-0.93]	0.67 [ 0.52-0.78]	TRUE
6	Sedentary time	Standard, Triano, 90min, Vertical, 100cpm	Standard, Zeros, 90min, VM, 200cpm	1.14 [ 0.58- 1.61]	Hours	<0.001	0.86 [ 0.75-0.92]	0.63 [ 0.48-0.75]	TRUE
6	Sedentary time	LFE, Triano, 180min, Vertical, 200cpm	LFE, Triano, 30min, Vertical, 200cpm	1.14 [ 0.62- 1.62]	Hours	<0.001	0.80 [ 0.65-0.89]	0.52 [ 0.36-0.65]	TRUE
6	Sedentary time	LFE, Zeros, 30min, Vertical, 150cpm	Standard, Choi, 90min, VM, 200cpm	1.14 [ 0.68- 1.57]	Hours	<0.001	0.84 [ 0.71-0.91]	0.62 [ 0.46-0.74]	TRUE
6	Sedentary time	LFE, Triano, 30min, Vertical, 150cpm	Standard, Choi, 180min, VM, 100cpm	1.15 [ 0.36- 1.88]	Hours	<0.001	0.52 [ 0.25-0.71]	0.37 [ 0.16-0.55]	TRUE
6	Sedentary time	LFE, Zeros, 60min, VM, 200cpm	Standard, Triano, 30min, VM, 200cpm	1.15 [ 0.40- 2.11]	Hours	<0.001	0.65 [ 0.43-0.79]	0.35 [ 0.19-0.49]	TRUE
6	Sedentary time	LFE, Triano, 60min, Vertical, 150cpm	Standard, Triano, 180min, VM, 200cpm	1.15 [ 0.57- 1.48]	Hours	<0.001	0.82 [ 0.68-0.90]	0.60 [ 0.44-0.73]	TRUE
6	Sedentary time	LFE, Choi, 90min, Vertical, 100cpm	Standard, Zeros, 90min, VM, 150cpm	1.15 [ 0.73- 1.51]	Hours	<0.001	0.90 [ 0.81-0.94]	0.65 [ 0.51-0.76]	TRUE
6	Sedentary time	LFE, Zeros, 30min, Vertical, 150cpm	Standard, Zeros, 60min, VM, 200cpm	1.15 [ 0.75- 1.48]	Hours	<0.001	0.87 [ 0.77-0.93]	0.62 [ 0.47-0.74]	TRUE
6	Sedentary time	LFE, Triano, 180min, Vertical, 150cpm	LFE, Triano, 30min, Vertical, 150cpm	1.16 [ 0.63- 1.62]	Hours	<0.001	0.79 [ 0.64-0.88]	0.50 [ 0.34-0.64]	TRUE
6	Sedentary time	LFE, Choi, 90min, VM, 200cpm	Standard, Triano, 30min, VM, 200cpm	1.16 [ 0.64- 2.13]	Hours	<0.001	0.63 [ 0.41-0.79]	0.33 [ 0.18-0.47]	TRUE
6	Sedentary time	LFE, Triano, 180min, Vertical, 100cpm	LFE, Triano, 30min, Vertical, 100cpm	1.16 [ 0.67- 1.63]	Hours	<0.001	0.79 [ 0.64-0.88]	0.49 [ 0.33-0.63]	TRUE
6	Sedentary time	LFE, Triano, 60min, Vertical, 100cpm	Standard, Zeros, 30min, VM, 200cpm	1.16 [ 0.74- 1.56]	Hours	<0.001	0.88 [ 0.78-0.93]	0.61 [ 0.46-0.72]	TRUE
6	Sedentary time	LFE, Triano, 180min, VM, 200cpm	LFE, Triano, 30min, VM, 200cpm	1.16 [ 0.74- 1.67]	Hours	<0.001	0.80 [ 0.66-0.89]	0.50 [ 0.34-0.63]	TRUE
6	Sedentary time	LFE, Zeros, 90min, Vertical, 100cpm	Standard, Triano, 90min, VM, 200cpm	1.16 [ 0.75- 1.77]	Hours	<0.001	0.88 [ 0.79-0.94]	0.58 [ 0.44-0.70]	TRUE
6	Sedentary time	LFE, Triano, 60min, VM, 200cpm	LFE, Zeros, 30min, VM, 100cpm	1.16 [ 0.81- 1.43]	Hours	<0.001	0.96 [ 0.92-0.98]	0.71 [ 0.59-0.80]	TRUE
6	Sedentary time	Standard, Choi, 180min, VM, 200cpm	Standard, Zeros, 60min, VM, 100cpm	1.16 [ 0.87- 1.39]	Hours	<0.001	0.95 [ 0.91-0.97]	0.69 [ 0.57-0.78]	TRUE
6	Sedentary time	LFE, Choi, 180min, Vertical, 200cpm	LFE, Zeros, 60min, Vertical, 100cpm	1.16 [ 0.96- 1.36]	Hours	<0.001	0.96 [ 0.92-0.98]	0.68 [ 0.56-0.77]	TRUE
6	Sedentary time	Standard, Triano, 60min, Vertical, 100cpm	Standard, Triano, 90min, VM, 200cpm	1.17 [ 0.43- 1.69]	Hours	<0.001	0.77 [ 0.61-0.87]	0.55 [ 0.38-0.69]	TRUE
6	Sedentary time	Standard, Triano, 90min, Vertical, 100cpm	Standard, Zeros, 180min, VM, 150cpm	1.17 [ 0.55- 1.92]	Hours	<0.001	0.77 [ 0.61-0.87]	0.53 [ 0.36-0.67]	TRUE
6	Sedentary time	LFE, Zeros, 30min, Vertical, 100cpm	Standard, Triano, 90min, VM, 150cpm	1.17 [ 0.58- 1.78]	Hours	<0.001	0.80 [ 0.65-0.89]	0.57 [ 0.40-0.70]	TRUE
6	Sedentary time	Standard, Triano, 180min, VM, 100cpm	Standard, Triano, 30min, VM, 150cpm	1.17 [ 0.58- 1.98]	Hours	<0.001	0.62 [ 0.39-0.78]	0.33 [ 0.17-0.48]	TRUE
6	Sedentary time	Standard, Choi, 180min, VM, 100cpm	Standard, Triano, 30min, VM, 150cpm	1.17 [ 0.59- 2.08]	Hours	<0.001	0.64 [ 0.42-0.79]	0.33 [ 0.17-0.47]	TRUE
6	Sedentary time	LFE, Choi, 180min, VM, 200cpm	LFE, Zeros, 90min, VM, 100cpm	1.17 [ 0.70- 1.31]	Hours	<0.001	0.95 [ 0.90-0.97]	0.73 [ 0.61-0.81]	TRUE
6	Sedentary time	LFE, Choi, 180min, Vertical, 200cpm	Standard, Zeros, 30min, Vertical, 100cpm	1.17 [ 0.76- 1.45]	Hours	<0.001	0.89 [ 0.81-0.94]	0.62 [ 0.48-0.73]	TRUE
6	Sedentary time	LFE, Zeros, 60min, Vertical, 150cpm	Standard, Zeros, 180min, VM, 150cpm	1.17 [ 0.82- 2.14]	Hours	<0.001	0.78 [ 0.63-0.88]	0.49 [ 0.33-0.63]	TRUE
6	Sedentary time	LFE, Zeros, 90min, VM, 200cpm	Standard, Triano, 60min, VM, 100cpm	1.17 [ 0.84- 1.58]	Hours	<0.001	0.93 [ 0.88-0.96]	0.63 [ 0.50-0.74]	TRUE
6	Sedentary time	Standard, Choi, 180min, Vertical, 150cpm	Standard, Triano, 60min, Vertical, 100cpm	1.17 [ 0.86- 1.68]	Hours	<0.001	0.92 [ 0.85-0.95]	0.61 [ 0.47-0.71]	TRUE
6	Sedentary time	LFE, Zeros, 180min, VM, 200cpm	LFE, Zeros, 30min, VM, 150cpm	1.17 [ 0.87- 1.61]	Hours	<0.001	0.92 [ 0.85-0.96]	0.64 [ 0.50-0.74]	TRUE
6	Sedentary time	Standard, Zeros, 180min, VM, 200cpm	Standard, Zeros, 90min, VM, 100cpm	1.17 [ 0.89- 1.56]	Hours	<0.001	0.94 [ 0.90-0.97]	0.67 [ 0.55-0.77]	TRUE
6	Sedentary time	LFE, Choi, 90min, VM, 200cpm	LFE, Zeros, 60min, VM, 100cpm	1.17 [ 0.95- 1.31]	Hours	<0.001	0.96 [ 0.92-0.98]	0.72 [ 0.60-0.80]	TRUE
6	Sedentary time	LFE, Triano, 30min, Vertical, 150cpm	Standard, Zeros, 90min, VM, 100cpm	1.18 [ 0.27- 1.93]	Hours	<0.001	0.51 [ 0.25-0.71]	0.37 [ 0.16-0.55]	TRUE
6	Sedentary time	LFE, Triano, 30min, Vertical, 200cpm	Standard, Choi, 90min, VM, 150cpm	1.18 [ 0.34- 2.01]	Hours	<0.001	0.57 [ 0.32-0.74]	0.40 [ 0.20-0.57]	TRUE
6	Sedentary time	LFE, Zeros, 60min, Vertical, 100cpm	Standard, Triano, 30min, Vertical, 100cpm	1.18 [ 0.34- 2.05]	Hours	<0.001	0.64 [ 0.41-0.79]	0.37 [ 0.20-0.51]	TRUE
6	Sedentary time	LFE, Triano, 90min, Vertical, 100cpm	Standard, Zeros, 180min, VM, 100cpm	1.18 [ 0.69- 2.00]	Hours	<0.001	0.78 [ 0.63-0.88]	0.53 [ 0.36-0.66]	TRUE
6	Sedentary time	LFE, Zeros, 90min, Vertical, 150cpm	Standard, Zeros, 180min, VM, 200cpm	1.18 [ 0.74- 1.86]	Hours	<0.001	0.84 [ 0.72-0.91]	0.58 [ 0.42-0.70]	TRUE
6	Sedentary time	LFE, Choi, 180min, Vertical, 200cpm	LFE, Triano, 180min, Vertical, 100cpm	1.18 [ 0.86- 1.34]	Hours	<0.001	0.96 [ 0.92-0.98]	0.69 [ 0.57-0.78]	TRUE
6	Sedentary time	LFE, Triano, 60min, Vertical, 150cpm	Standard, Zeros, 60min, VM, 200cpm	1.18 [ 0.86- 1.51]	Hours	<0.001	0.88 [ 0.78-0.93]	0.62 [ 0.47-0.73]	TRUE
6	Sedentary time	LFE, Triano, 180min, VM, 200cpm	LFE, Zeros, 60min, VM, 100cpm	1.18 [ 0.92- 1.49]	Hours	<0.001	0.95 [ 0.91-0.97]	0.69 [ 0.57-0.78]	TRUE
6	Sedentary time	LFE, Zeros, 90min, VM, 200cpm	Standard, Zeros, 30min, VM, 100cpm	1.18 [ 0.93- 1.46]	Hours	<0.001	0.91 [ 0.84-0.95]	0.61 [ 0.48-0.72]	TRUE
6	Sedentary time	LFE, Triano, 30min, Vertical, 200cpm	Standard, Triano, 180min, VM, 150cpm	1.19 [ 0.52- 1.83]	Hours	<0.001	0.51 [ 0.25-0.71]	0.37 [ 0.16-0.55]	TRUE
6	Sedentary time	Standard, Triano, 30min, Vertical, 150cpm	Standard, Zeros, 60min, VM, 100cpm	1.19 [ 0.52- 1.98]	Hours	<0.001	0.38 [ 0.09-0.61]	0.24 [ 0.05-0.42]	TRUE
6	Sedentary time	Standard, Triano, 180min, Vertical, 100cpm	Standard, Zeros, 180min, VM, 200cpm	1.19 [ 0.57- 1.58]	Hours	<0.001	0.83 [ 0.70-0.90]	0.61 [ 0.45-0.73]	TRUE
6	Sedentary time	LFE, Choi, 180min, VM, 100cpm	Standard, Triano, 30min, VM, 100cpm	1.19 [ 0.60- 1.83]	Hours	<0.001	0.69 [ 0.49-0.82]	0.39 [ 0.23-0.53]	TRUE
6	Sedentary time	LFE, Triano, 180min, Vertical, 100cpm	Standard, Zeros, 90min, VM, 150cpm	1.19 [ 0.78- 1.62]	Hours	<0.001	0.88 [ 0.78-0.93]	0.61 [ 0.47-0.73]	TRUE
6	Sedentary time	Standard, Choi, 90min, VM, 200cpm	Standard, Triano, 90min, VM, 100cpm	1.19 [ 0.84- 1.40]	Hours	<0.001	0.95 [ 0.91-0.97]	0.68 [ 0.56-0.78]	TRUE
6	Sedentary time	LFE, Zeros, 90min, Vertical, 200cpm	Standard, Zeros, 30min, Vertical, 100cpm	1.19 [ 0.84- 1.58]	Hours	<0.001	0.89 [ 0.81-0.94]	0.61 [ 0.47-0.72]	TRUE
6	Sedentary time	Standard, Choi, 90min, Vertical, 200cpm	Standard, Triano, 90min, Vertical, 100cpm	1.19 [ 0.88- 1.39]	Hours	<0.001	0.97 [ 0.94-0.98]	0.69 [ 0.57-0.78]	TRUE
6	Sedentary time	LFE, Triano, 90min, Vertical, 100cpm	LFE, Zeros, 180min, VM, 150cpm	1.20 [ 0.55- 2.01]	Hours	<0.001	0.75 [ 0.57-0.86]	0.51 [ 0.33-0.65]	TRUE
6	Sedentary time	LFE, Choi, 90min, Vertical, 100cpm	LFE, Zeros, 90min, VM, 200cpm	1.20 [ 0.58- 1.65]	Hours	<0.001	0.86 [ 0.76-0.92]	0.61 [ 0.46-0.73]	TRUE
6	Sedentary time	LFE, Zeros, 60min, Vertical, 100cpm	LFE, Zeros, 90min, VM, 200cpm	1.20 [ 0.61- 1.69]	Hours	<0.001	0.83 [ 0.71-0.91]	0.60 [ 0.44-0.72]	TRUE
6	Sedentary time	LFE, Zeros, 90min, VM, 150cpm	Standard, Triano, 30min, VM, 150cpm	1.20 [ 0.72- 2.10]	Hours	<0.001	0.63 [ 0.40-0.78]	0.32 [ 0.17-0.46]	TRUE
6	Sedentary time	LFE, Zeros, 180min, Vertical, 100cpm	Standard, Choi, 180min, VM, 200cpm	1.20 [ 0.80- 1.62]	Hours	<0.001	0.90 [ 0.82-0.94]	0.63 [ 0.49-0.74]	TRUE
6	Sedentary time	LFE, Choi, 180min, VM, 200cpm	Standard, Zeros, 30min, VM, 100cpm	1.20 [ 0.84- 1.51]	Hours	<0.001	0.91 [ 0.83-0.95]	0.62 [ 0.48-0.73]	TRUE
6	Sedentary time	LFE, Choi, 90min, Vertical, 200cpm	LFE, Triano, 90min, Vertical, 100cpm	1.20 [ 0.89- 1.41]	Hours	<0.001	0.97 [ 0.94-0.98]	0.70 [ 0.58-0.79]	TRUE
6	Sedentary time	LFE, Triano, 180min, Vertical, 200cpm	LFE, Triano, 90min, Vertical, 100cpm	1.20 [ 0.90- 1.47]	Hours	<0.001	0.96 [ 0.93-0.98]	0.67 [ 0.55-0.76]	TRUE
6	Sedentary time	Standard, Zeros, 180min, Vertical, 200cpm	Standard, Zeros, 90min, Vertical, 100cpm	1.20 [ 0.93- 1.40]	Hours	<0.001	0.96 [ 0.92-0.98]	0.69 [ 0.57-0.78]	TRUE
6	Sedentary time	LFE, Triano, 30min, Vertical, 150cpm	LFE, Zeros, 30min, VM, 200cpm	1.21 [ 0.38- 1.89]	Hours	<0.001	0.68 [ 0.48-0.82]	0.48 [ 0.29-0.63]	TRUE
6	Sedentary time	LFE, Zeros, 60min, Vertical, 150cpm	Standard, Triano, 30min, Vertical, 150cpm	1.21 [ 0.41- 1.96]	Hours	<0.001	0.66 [ 0.44-0.80]	0.39 [ 0.22-0.53]	TRUE
6	Sedentary time	Standard, Triano, 30min, Vertical, 100cpm	Standard, Zeros, 30min, VM, 100cpm	1.21 [ 0.56- 1.72]	Hours	<0.001	0.56 [ 0.31-0.74]	0.34 [ 0.16-0.50]	TRUE
6	Sedentary time	LFE, Triano, 30min, Vertical, 150cpm	Standard, Triano, 180min, VM, 100cpm	1.21 [ 0.56- 1.95]	Hours	<0.001	0.47 [ 0.19-0.68]	0.32 [ 0.12-0.50]	TRUE
6	Sedentary time	LFE, Zeros, 180min, Vertical, 100cpm	Standard, Zeros, 90min, VM, 200cpm	1.21 [ 0.70- 1.66]	Hours	<0.001	0.88 [ 0.79-0.94]	0.62 [ 0.48-0.73]	TRUE
6	Sedentary time	LFE, Choi, 180min, Vertical, 150cpm	LFE, Triano, 30min, Vertical, 150cpm	1.21 [ 0.80- 1.70]	Hours	<0.001	0.81 [ 0.67-0.89]	0.49 [ 0.34-0.62]	TRUE
6	Sedentary time	LFE, Choi, 180min, Vertical, 200cpm	LFE, Triano, 30min, Vertical, 200cpm	1.21 [ 0.80- 1.70]	Hours	<0.001	0.81 [ 0.68-0.90]	0.51 [ 0.35-0.64]	TRUE
6	Sedentary time	LFE, Choi, 180min, VM, 200cpm	LFE, Choi, 90min, VM, 100cpm	1.21 [ 0.92- 1.41]	Hours	<0.001	0.96 [ 0.92-0.98]	0.69 [ 0.57-0.78]	TRUE
6	Sedentary time	LFE, Choi, 180min, VM, 200cpm	LFE, Triano, 180min, VM, 100cpm	1.21 [ 0.92- 1.46]	Hours	<0.001	0.95 [ 0.90-0.97]	0.68 [ 0.56-0.78]	TRUE
6	Sedentary time	Standard, Triano, 180min, VM, 200cpm	Standard, Triano, 90min, VM, 100cpm	1.21 [ 1.02- 1.46]	Hours	<0.001	0.96 [ 0.92-0.98]	0.66 [ 0.53-0.75]	TRUE
6	Sedentary time	LFE, Triano, 90min, Vertical, 100cpm	Standard, Triano, 30min, Vertical, 100cpm	1.22 [ 0.22- 1.69]	Hours	<0.001	0.59 [ 0.35-0.76]	0.36 [ 0.18-0.51]	TRUE
6	Sedentary time	LFE, Triano, 30min, Vertical, 150cpm	Standard, Choi, 90min, VM, 100cpm	1.22 [ 0.36- 2.13]	Hours	<0.001	0.53 [ 0.27-0.72]	0.36 [ 0.16-0.53]	TRUE
6	Sedentary time	LFE, Triano, 30min, Vertical, 100cpm	LFE, Zeros, 90min, VM, 100cpm	1.22 [ 0.37- 1.98]	Hours	<0.001	0.46 [ 0.18-0.67]	0.32 [ 0.11-0.50]	TRUE
6	Sedentary time	Standard, Choi, 90min, Vertical, 100cpm	Standard, Triano, 30min, Vertical, 150cpm	1.22 [ 0.40- 2.02]	Hours	<0.001	0.65 [ 0.43-0.80]	0.38 [ 0.21-0.53]	TRUE
6	Sedentary time	LFE, Choi, 90min, Vertical, 100cpm	Standard, Triano, 30min, Vertical, 100cpm	1.22 [ 0.46- 2.03]	Hours	<0.001	0.60 [ 0.36-0.76]	0.33 [ 0.17-0.48]	TRUE
6	Sedentary time	LFE, Choi, 180min, Vertical, 100cpm	Standard, Triano, 90min, VM, 200cpm	1.22 [ 0.63- 1.89]	Hours	<0.001	0.87 [ 0.77-0.93]	0.59 [ 0.44-0.70]	TRUE
6	Sedentary time	LFE, Triano, 90min, Vertical, 150cpm	Standard, Zeros, 90min, VM, 200cpm	1.22 [ 0.71- 1.60]	Hours	<0.001	0.89 [ 0.80-0.94]	0.62 [ 0.48-0.74]	TRUE
6	Sedentary time	LFE, Zeros, 90min, Vertical, 200cpm	Standard, Triano, 60min, Vertical, 100cpm	1.22 [ 0.78- 1.57]	Hours	<0.001	0.91 [ 0.84-0.95]	0.61 [ 0.47-0.72]	TRUE
6	Sedentary time	Standard, Choi, 180min, VM, 150cpm	Standard, Zeros, 30min, VM, 100cpm	1.22 [ 0.90- 1.71]	Hours	<0.001	0.90 [ 0.83-0.95]	0.59 [ 0.45-0.70]	TRUE
6	Sedentary time	LFE, Zeros, 60min, Vertical, 200cpm	Standard, Triano, 30min, Vertical, 200cpm	1.23 [ 0.48- 2.06]	Hours	<0.001	0.67 [ 0.46-0.81]	0.39 [ 0.22-0.54]	TRUE
6	Sedentary time	LFE, Zeros, 60min, Vertical, 100cpm	Standard, Zeros, 90min, VM, 150cpm	1.23 [ 0.52- 1.58]	Hours	<0.001	0.87 [ 0.76-0.93]	0.64 [ 0.49-0.75]	TRUE
6	Sedentary time	LFE, Triano, 60min, Vertical, 100cpm	LFE, Triano, 90min, VM, 200cpm	1.23 [ 0.53- 1.70]	Hours	<0.001	0.83 [ 0.70-0.90]	0.59 [ 0.43-0.72]	TRUE
6	Sedentary time	LFE, Triano, 30min, Vertical, 150cpm	LFE, Triano, 60min, VM, 200cpm	1.23 [ 0.57- 1.86]	Hours	<0.001	0.64 [ 0.42-0.79]	0.44 [ 0.25-0.60]	TRUE
6	Sedentary time	Standard, Triano, 180min, Vertical, 100cpm	Standard, Triano, 30min, Vertical, 150cpm	1.23 [ 0.60- 2.02]	Hours	<0.001	0.62 [ 0.39-0.78]	0.35 [ 0.18-0.49]	TRUE
6	Sedentary time	LFE, Triano, 90min, Vertical, 150cpm	LFE, Zeros, 180min, VM, 200cpm	1.23 [ 0.62- 2.04]	Hours	<0.001	0.75 [ 0.58-0.86]	0.48 [ 0.31-0.62]	TRUE
6	Sedentary time	LFE, Triano, 180min, Vertical, 100cpm	Standard, Triano, 30min, Vertical, 100cpm	1.23 [ 0.64- 2.11]	Hours	<0.001	0.58 [ 0.33-0.75]	0.31 [ 0.15-0.46]	TRUE
6	Sedentary time	LFE, Choi, 90min, Vertical, 100cpm	Standard, Triano, 180min, VM, 150cpm	1.23 [ 0.76- 1.66]	Hours	<0.001	0.87 [ 0.77-0.93]	0.60 [ 0.45-0.71]	TRUE
6	Sedentary time	Standard, Choi, 180min, Vertical, 100cpm	Standard, Triano, 30min, Vertical, 150cpm	1.23 [ 0.77- 2.05]	Hours	<0.001	0.64 [ 0.42-0.79]	0.34 [ 0.18-0.49]	TRUE
6	Sedentary time	LFE, Choi, 180min, Vertical, 100cpm	LFE, Triano, 30min, Vertical, 100cpm	1.23 [ 0.80- 1.73]	Hours	<0.001	0.81 [ 0.67-0.89]	0.48 [ 0.33-0.61]	TRUE
6	Sedentary time	LFE, Zeros, 180min, Vertical, 200cpm	LFE, Zeros, 90min, Vertical, 100cpm	1.23 [ 0.94- 1.51]	Hours	<0.001	0.94 [ 0.89-0.97]	0.62 [ 0.49-0.73]	TRUE
6	Sedentary time	LFE, Choi, 90min, VM, 200cpm	LFE, Triano, 90min, VM, 100cpm	1.23 [ 1.03- 1.41]	Hours	<0.001	0.96 [ 0.93-0.98]	0.69 [ 0.58-0.78]	TRUE
6	Sedentary time	LFE, Triano, 90min, Vertical, 150cpm	Standard, Triano, 30min, Vertical, 150cpm	1.24 [ 0.23- 1.79]	Hours	<0.001	0.61 [ 0.38-0.77]	0.38 [ 0.20-0.53]	TRUE
6	Sedentary time	Standard, Triano, 30min, Vertical, 200cpm	Standard, Triano, 60min, VM, 200cpm	1.24 [ 0.35- 1.71]	Hours	<0.001	0.50 [ 0.23-0.70]	0.31 [ 0.12-0.48]	TRUE
6	Sedentary time	LFE, Choi, 90min, Vertical, 150cpm	Standard, Triano, 30min, Vertical, 150cpm	1.24 [ 0.42- 1.93]	Hours	<0.001	0.62 [ 0.39-0.78]	0.35 [ 0.18-0.50]	TRUE
6	Sedentary time	Standard, Triano, 30min, Vertical, 200cpm	Standard, Triano, 90min, VM, 150cpm	1.24 [ 0.44- 1.97]	Hours	<0.001	0.34 [ 0.04-0.58]	0.21 [ 0.02-0.39]	TRUE
6	Sedentary time	Standard, Choi, 180min, Vertical, 100cpm	Standard, Zeros, 180min, VM, 200cpm	1.24 [ 0.58- 1.63]	Hours	<0.001	0.84 [ 0.72-0.91]	0.60 [ 0.45-0.72]	TRUE
6	Sedentary time	Standard, Triano, 30min, Vertical, 150cpm	Standard, Zeros, 30min, VM, 150cpm	1.24 [ 0.59- 1.74]	Hours	<0.001	0.57 [ 0.32-0.74]	0.35 [ 0.17-0.51]	TRUE
6	Sedentary time	LFE, Triano, 180min, Vertical, 150cpm	Standard, Triano, 30min, Vertical, 150cpm	1.24 [ 0.60- 2.04]	Hours	<0.001	0.60 [ 0.36-0.76]	0.33 [ 0.16-0.48]	TRUE
6	Sedentary time	LFE, Triano, 180min, VM, 200cpm	Standard, Triano, 30min, VM, 200cpm	1.24 [ 0.64- 2.10]	Hours	<0.001	0.61 [ 0.38-0.77]	0.31 [ 0.16-0.45]	TRUE
6	Sedentary time	Standard, Triano, 30min, Vertical, 200cpm	Standard, Zeros, 30min, VM, 200cpm	1.24 [ 0.65- 1.82]	Hours	<0.001	0.57 [ 0.32-0.74]	0.35 [ 0.17-0.51]	TRUE
6	Sedentary time	Standard, Triano, 180min, Vertical, 200cpm	Standard, Triano, 90min, Vertical, 100cpm	1.24 [ 0.90- 1.52]	Hours	<0.001	0.96 [ 0.92-0.98]	0.65 [ 0.53-0.75]	TRUE
6	Sedentary time	LFE, Triano, 30min, Vertical, 200cpm	Standard, Zeros, 180min, VM, 100cpm	1.25 [ 0.47- 2.06]	Hours	<0.001	0.43 [ 0.14-0.65]	0.28 [ 0.08-0.46]	TRUE
6	Sedentary time	LFE, Triano, 180min, Vertical, 150cpm	Standard, Zeros, 180min, VM, 200cpm	1.25 [ 0.65- 1.53]	Hours	<0.001	0.84 [ 0.72-0.91]	0.61 [ 0.45-0.73]	TRUE
6	Sedentary time	LFE, Triano, 90min, Vertical, 150cpm	Standard, Zeros, 180min, VM, 150cpm	1.25 [ 0.72- 1.93]	Hours	<0.001	0.79 [ 0.64-0.88]	0.52 [ 0.36-0.65]	TRUE
6	Sedentary time	LFE, Choi, 180min, Vertical, 100cpm	Standard, Choi, 180min, VM, 150cpm	1.25 [ 0.83- 1.69]	Hours	<0.001	0.90 [ 0.81-0.94]	0.61 [ 0.46-0.72]	TRUE
6	Sedentary time	Standard, Choi, 180min, Vertical, 150cpm	Standard, Zeros, 30min, Vertical, 100cpm	1.25 [ 0.86- 1.62]	Hours	<0.001	0.90 [ 0.82-0.94]	0.61 [ 0.47-0.72]	TRUE
6	Sedentary time	LFE, Triano, 90min, Vertical, 100cpm	Standard, Triano, 60min, VM, 200cpm	1.25 [ 0.91- 1.77]	Hours	<0.001	0.87 [ 0.76-0.93]	0.53 [ 0.38-0.65]	TRUE
6	Sedentary time	LFE, Triano, 90min, Vertical, 200cpm	Standard, Triano, 30min, Vertical, 200cpm	1.26 [ 0.29- 1.94]	Hours	<0.001	0.62 [ 0.39-0.78]	0.38 [ 0.20-0.54]	TRUE
6	Sedentary time	LFE, Triano, 30min, Vertical, 200cpm	LFE, Zeros, 180min, VM, 150cpm	1.26 [ 0.46- 2.04]	Hours	<0.001	0.40 [ 0.11-0.63]	0.27 [ 0.06-0.45]	TRUE
6	Sedentary time	LFE, Choi, 90min, Vertical, 200cpm	Standard, Triano, 30min, Vertical, 200cpm	1.26 [ 0.48- 2.00]	Hours	<0.001	0.63 [ 0.40-0.78]	0.36 [ 0.19-0.51]	TRUE
6	Sedentary time	Standard, Zeros, 30min, Vertical, 100cpm	Standard, Zeros, 90min, VM, 150cpm	1.26 [ 0.56- 1.63]	Hours	<0.001	0.69 [ 0.49-0.82]	0.53 [ 0.33-0.68]	TRUE
6	Sedentary time	LFE, Zeros, 30min, VM, 200cpm	Standard, Triano, 30min, VM, 150cpm	1.26 [ 0.58- 2.20]	Hours	<0.001	0.70 [ 0.50-0.83]	0.36 [ 0.21-0.50]	TRUE
6	Sedentary time	LFE, Zeros, 60min, Vertical, 100cpm	Standard, Triano, 180min, VM, 150cpm	1.26 [ 0.65- 1.77]	Hours	<0.001	0.83 [ 0.70-0.90]	0.58 [ 0.42-0.70]	TRUE
6	Sedentary time	LFE, Triano, 180min, Vertical, 100cpm	LFE, Zeros, 90min, VM, 200cpm	1.26 [ 0.67- 1.72]	Hours	<0.001	0.85 [ 0.73-0.92]	0.58 [ 0.42-0.70]	TRUE
6	Sedentary time	LFE, Choi, 180min, VM, 150cpm	Standard, Triano, 30min, VM, 150cpm	1.26 [ 0.68- 2.04]	Hours	<0.001	0.65 [ 0.44-0.80]	0.34 [ 0.18-0.47]	TRUE
6	Sedentary time	LFE, Triano, 180min, Vertical, 200cpm	Standard, Triano, 30min, Vertical, 200cpm	1.26 [ 0.69- 2.08]	Hours	<0.001	0.61 [ 0.38-0.77]	0.34 [ 0.17-0.48]	TRUE
6	Sedentary time	LFE, Triano, 90min, Vertical, 100cpm	Standard, Choi, 90min, VM, 150cpm	1.26 [ 0.70- 1.48]	Hours	<0.001	0.89 [ 0.81-0.94]	0.65 [ 0.51-0.76]	TRUE
6	Sedentary time	LFE, Zeros, 60min, Vertical, 100cpm	Standard, Zeros, 180min, VM, 100cpm	1.26 [ 0.77- 2.08]	Hours	<0.001	0.78 [ 0.62-0.87]	0.50 [ 0.33-0.64]	TRUE
6	Sedentary time	LFE, Triano, 90min, Vertical, 100cpm	Standard, Zeros, 60min, VM, 150cpm	1.26 [ 0.85- 1.54]	Hours	<0.001	0.90 [ 0.82-0.94]	0.63 [ 0.48-0.73]	TRUE
6	Sedentary time	LFE, Zeros, 60min, Vertical, 200cpm	Standard, Zeros, 180min, VM, 200cpm	1.26 [ 0.87- 2.18]	Hours	<0.001	0.79 [ 0.63-0.88]	0.49 [ 0.32-0.62]	TRUE
6	Sedentary time	LFE, Choi, 90min, Vertical, 100cpm	Standard, Zeros, 180min, VM, 100cpm	1.26 [ 0.92- 2.07]	Hours	<0.001	0.80 [ 0.66-0.89]	0.51 [ 0.35-0.64]	TRUE
6	Sedentary time	LFE, Triano, 60min, Vertical, 100cpm	Standard, Triano, 90min, VM, 150cpm	1.27 [ 0.48- 1.70]	Hours	<0.001	0.84 [ 0.71-0.91]	0.59 [ 0.43-0.71]	TRUE
6	Sedentary time	LFE, Triano, 180min, Vertical, 100cpm	Standard, Choi, 180min, VM, 150cpm	1.27 [ 0.70- 1.61]	Hours	<0.001	0.88 [ 0.78-0.93]	0.62 [ 0.47-0.73]	TRUE
6	Sedentary time	LFE, Choi, 180min, Vertical, 150cpm	Standard, Triano, 30min, Vertical, 150cpm	1.27 [ 0.78- 2.13]	Hours	<0.001	0.63 [ 0.40-0.78]	0.33 [ 0.17-0.47]	TRUE
6	Sedentary time	LFE, Zeros, 180min, Vertical, 100cpm	Standard, Zeros, 180min, VM, 150cpm	1.27 [ 0.85- 1.67]	Hours	<0.001	0.89 [ 0.80-0.94]	0.58 [ 0.44-0.70]	TRUE
6	Sedentary time	LFE, Choi, 90min, Vertical, 100cpm	Standard, Choi, 90min, VM, 150cpm	1.27 [ 0.86- 1.69]	Hours	<0.001	0.91 [ 0.83-0.95]	0.62 [ 0.48-0.73]	TRUE
6	Sedentary time	LFE, Choi, 180min, VM, 200cpm	LFE, Zeros, 60min, VM, 100cpm	1.27 [ 0.96- 1.59]	Hours	<0.001	0.95 [ 0.90-0.97]	0.66 [ 0.54-0.76]	TRUE
6	Sedentary time	LFE, Triano, 90min, Vertical, 200cpm	LFE, Zeros, 30min, Vertical, 100cpm	1.27 [ 1.00- 1.50]	Hours	<0.001	0.96 [ 0.93-0.98]	0.66 [ 0.54-0.76]	TRUE
6	Sedentary time	LFE, Choi, 180min, VM, 200cpm	LFE, Triano, 90min, VM, 100cpm	1.27 [ 1.07- 1.80]	Hours	<0.001	0.94 [ 0.89-0.97]	0.63 [ 0.50-0.73]	TRUE
6	Sedentary time	LFE, Zeros, 30min, Vertical, 200cpm	Standard, Triano, 30min, Vertical, 150cpm	1.28 [ 0.65- 2.21]	Hours	<0.001	0.73 [ 0.54-0.84]	0.39 [ 0.24-0.53]	TRUE
6	Sedentary time	LFE, Choi, 180min, Vertical, 100cpm	Standard, Zeros, 90min, VM, 150cpm	1.28 [ 0.76- 1.79]	Hours	<0.001	0.88 [ 0.78-0.93]	0.59 [ 0.45-0.71]	TRUE
6	Sedentary time	LFE, Triano, 180min, Vertical, 100cpm	Standard, Triano, 180min, VM, 150cpm	1.28 [ 0.79- 1.64]	Hours	<0.001	0.88 [ 0.78-0.93]	0.58 [ 0.43-0.70]	TRUE
6	Sedentary time	LFE, Zeros, 180min, Vertical, 150cpm	LFE, Zeros, 30min, Vertical, 100cpm	1.28 [ 0.92- 1.70]	Hours	<0.001	0.92 [ 0.86-0.96]	0.59 [ 0.46-0.70]	TRUE
6	Sedentary time	LFE, Zeros, 90min, Vertical, 100cpm	Standard, Choi, 180min, VM, 150cpm	1.28 [ 0.92- 1.71]	Hours	<0.001	0.88 [ 0.78-0.93]	0.59 [ 0.44-0.70]	TRUE
6	Sedentary time	Standard, Zeros, 180min, Vertical, 200cpm	Standard, Zeros, 60min, Vertical, 100cpm	1.28 [ 1.03- 1.65]	Hours	<0.001	0.95 [ 0.91-0.97]	0.62 [ 0.49-0.72]	TRUE
6	Sedentary time	LFE, Triano, 180min, VM, 200cpm	LFE, Triano, 90min, VM, 100cpm	1.28 [ 1.05- 1.41]	Hours	<0.001	0.96 [ 0.93-0.98]	0.67 [ 0.55-0.77]	TRUE
6	Sedentary time	Standard, Triano, 60min, Vertical, 100cpm	Standard, Zeros, 90min, VM, 150cpm	1.29 [ 0.48- 1.70]	Hours	<0.001	0.73 [ 0.54-0.84]	0.52 [ 0.34-0.66]	TRUE
6	Sedentary time	LFE, Choi, 90min, Vertical, 100cpm	LFE, Triano, 180min, VM, 200cpm	1.29 [ 0.77- 1.85]	Hours	<0.001	0.86 [ 0.75-0.92]	0.56 [ 0.41-0.69]	TRUE
6	Sedentary time	LFE, Choi, 180min, Vertical, 100cpm	Standard, Triano, 30min, Vertical, 100cpm	1.29 [ 0.77- 2.20]	Hours	<0.001	0.61 [ 0.37-0.77]	0.31 [ 0.16-0.45]	TRUE
6	Sedentary time	LFE, Zeros, 60min, Vertical, 100cpm	Standard, Zeros, 60min, VM, 150cpm	1.29 [ 0.83- 1.64]	Hours	<0.001	0.90 [ 0.82-0.94]	0.60 [ 0.46-0.71]	TRUE
6	Sedentary time	LFE, Choi, 180min, VM, 100cpm	LFE, Triano, 30min, VM, 100cpm	1.29 [ 0.85- 1.74]	Hours	<0.001	0.86 [ 0.75-0.92]	0.52 [ 0.37-0.64]	TRUE
6	Sedentary time	LFE, Choi, 180min, VM, 200cpm	LFE, Triano, 30min, VM, 200cpm	1.29 [ 0.86- 1.77]	Hours	<0.001	0.83 [ 0.70-0.90]	0.49 [ 0.34-0.61]	TRUE
6	Sedentary time	Standard, Triano, 90min, Vertical, 100cpm	Standard, Zeros, 60min, VM, 200cpm	1.29 [ 0.91- 1.67]	Hours	<0.001	0.88 [ 0.78-0.93]	0.59 [ 0.44-0.70]	TRUE
6	Sedentary time	LFE, Choi, 90min, Vertical, 100cpm	Standard, Zeros, 60min, VM, 150cpm	1.29 [ 0.99- 1.69]	Hours	<0.001	0.91 [ 0.84-0.95]	0.60 [ 0.46-0.71]	TRUE
6	Sedentary time	LFE, Triano, 30min, Vertical, 150cpm	Standard, Triano, 60min, VM, 150cpm	1.30 [ 0.69- 1.85]	Hours	<0.001	0.67 [ 0.46-0.81]	0.42 [ 0.24-0.57]	TRUE
6	Sedentary time	LFE, Choi, 90min, Vertical, 100cpm	LFE, Zeros, 180min, VM, 150cpm	1.30 [ 0.70- 2.05]	Hours	<0.001	0.77 [ 0.61-0.87]	0.49 [ 0.33-0.63]	TRUE
6	Sedentary time	LFE, Zeros, 60min, Vertical, 150cpm	Standard, Choi, 180min, VM, 200cpm	1.30 [ 0.78- 1.76]	Hours	<0.001	0.85 [ 0.74-0.92]	0.58 [ 0.42-0.70]	TRUE
6	Sedentary time	LFE, Zeros, 90min, VM, 200cpm	Standard, Triano, 30min, VM, 200cpm	1.30 [ 0.81- 2.15]	Hours	<0.001	0.61 [ 0.38-0.77]	0.29 [ 0.15-0.42]	TRUE
6	Sedentary time	LFE, Choi, 180min, VM, 150cpm	LFE, Triano, 30min, VM, 150cpm	1.30 [ 0.88- 1.76]	Hours	<0.001	0.84 [ 0.72-0.91]	0.50 [ 0.35-0.62]	TRUE
6	Sedentary time	LFE, Triano, 90min, Vertical, 100cpm	Standard, Triano, 90min, VM, 150cpm	1.30 [ 0.89- 1.88]	Hours	<0.001	0.88 [ 0.78-0.93]	0.56 [ 0.41-0.67]	TRUE
6	Sedentary time	LFE, Zeros, 180min, VM, 150cpm	LFE, Zeros, 30min, VM, 100cpm	1.30 [ 1.06- 1.74]	Hours	<0.001	0.92 [ 0.86-0.96]	0.60 [ 0.47-0.71]	TRUE
6	Sedentary time	LFE, Triano, 30min, Vertical, 100cpm	Standard, Zeros, 30min, VM, 100cpm	1.31 [ 0.56- 1.90]	Hours	<0.001	0.76 [ 0.60-0.87]	0.48 [ 0.31-0.61]	TRUE
6	Sedentary time	LFE, Choi, 180min, Vertical, 150cpm	Standard, Zeros, 180min, VM, 200cpm	1.31 [ 0.66- 1.62]	Hours	<0.001	0.86 [ 0.75-0.92]	0.60 [ 0.45-0.72]	TRUE
6	Sedentary time	LFE, Zeros, 30min, VM, 150cpm	Standard, Triano, 30min, VM, 100cpm	1.31 [ 0.68- 2.25]	Hours	<0.001	0.73 [ 0.54-0.84]	0.37 [ 0.22-0.51]	TRUE
6	Sedentary time	LFE, Zeros, 60min, Vertical, 100cpm	Standard, Choi, 90min, VM, 150cpm	1.31 [ 0.73- 1.71]	Hours	<0.001	0.87 [ 0.77-0.93]	0.61 [ 0.46-0.72]	TRUE
6	Sedentary time	LFE, Zeros, 180min, Vertical, 100cpm	Standard, Choi, 90min, VM, 200cpm	1.31 [ 0.80- 1.74]	Hours	<0.001	0.88 [ 0.79-0.93]	0.58 [ 0.44-0.70]	TRUE
6	Sedentary time	LFE, Zeros, 180min, Vertical, 100cpm	Standard, Triano, 180min, VM, 200cpm	1.32 [ 0.66- 1.70]	Hours	<0.001	0.87 [ 0.77-0.93]	0.58 [ 0.43-0.70]	TRUE
6	Sedentary time	LFE, Triano, 90min, Vertical, 200cpm	Standard, Zeros, 180min, VM, 200cpm	1.32 [ 0.77- 1.98]	Hours	<0.001	0.80 [ 0.65-0.89]	0.51 [ 0.35-0.64]	TRUE
6	Sedentary time	LFE, Choi, 180min, Vertical, 200cpm	Standard, Triano, 30min, Vertical, 200cpm	1.32 [ 0.79- 2.13]	Hours	<0.001	0.64 [ 0.41-0.79]	0.34 [ 0.18-0.48]	TRUE
6	Sedentary time	LFE, Choi, 90min, Vertical, 150cpm	Standard, Zeros, 180min, VM, 150cpm	1.32 [ 0.82- 1.99]	Hours	<0.001	0.81 [ 0.68-0.90]	0.51 [ 0.35-0.64]	TRUE
6	Sedentary time	LFE, Zeros, 90min, Vertical, 100cpm	Standard, Zeros, 90min, VM, 150cpm	1.32 [ 0.85- 1.68]	Hours	<0.001	0.90 [ 0.82-0.95]	0.60 [ 0.46-0.71]	TRUE
6	Sedentary time	LFE, Choi, 180min, Vertical, 200cpm	LFE, Triano, 90min, Vertical, 100cpm	1.32 [ 0.91- 1.59]	Hours	<0.001	0.94 [ 0.90-0.97]	0.63 [ 0.51-0.74]	TRUE
6	Sedentary time	Standard, Triano, 30min, Vertical, 200cpm	Standard, Zeros, 180min, VM, 100cpm	1.32 [-0.04- 1.93]	Hours	<0.001	0.24 [-0.07-0.51]	0.16 [-0.05-0.35]	TRUE
6	Sedentary time	LFE, Choi, 180min, Vertical, 100cpm	LFE, Zeros, 90min, VM, 200cpm	1.33 [ 0.68- 1.88]	Hours	<0.001	0.85 [ 0.73-0.91]	0.55 [ 0.40-0.68]	TRUE
6	Sedentary time	LFE, Triano, 90min, Vertical, 150cpm	Standard, Choi, 180min, VM, 200cpm	1.33 [ 0.75- 1.62]	Hours	<0.001	0.87 [ 0.76-0.93]	0.61 [ 0.46-0.73]	TRUE
6	Sedentary time	LFE, Triano, 30min, Vertical, 200cpm	Standard, Triano, 60min, VM, 200cpm	1.33 [ 0.75- 1.86]	Hours	<0.001	0.69 [ 0.49-0.82]	0.42 [ 0.25-0.56]	TRUE
6	Sedentary time	LFE, Zeros, 30min, Vertical, 150cpm	Standard, Triano, 90min, VM, 200cpm	1.33 [ 0.76- 1.78]	Hours	<0.001	0.81 [ 0.66-0.89]	0.52 [ 0.36-0.65]	TRUE
6	Sedentary time	LFE, Zeros, 180min, Vertical, 100cpm	Standard, Zeros, 60min, VM, 200cpm	1.33 [ 0.82- 1.78]	Hours	<0.001	0.90 [ 0.81-0.94]	0.57 [ 0.43-0.68]	TRUE
6	Sedentary time	LFE, Choi, 90min, Vertical, 150cpm	Standard, Choi, 180min, VM, 200cpm	1.33 [ 0.89- 1.75]	Hours	<0.001	0.89 [ 0.80-0.94]	0.59 [ 0.45-0.70]	TRUE
6	Sedentary time	Standard, Zeros, 180min, VM, 200cpm	Standard, Zeros, 30min, VM, 150cpm	1.33 [ 0.93- 1.87]	Hours	<0.001	0.87 [ 0.78-0.93]	0.54 [ 0.39-0.66]	TRUE
6	Sedentary time	Standard, Choi, 180min, Vertical, 200cpm	Standard, Triano, 90min, Vertical, 100cpm	1.33 [ 0.94- 1.59]	Hours	<0.001	0.95 [ 0.91-0.97]	0.63 [ 0.50-0.73]	TRUE
6	Sedentary time	Standard, Triano, 90min, Vertical, 200cpm	Standard, Zeros, 30min, Vertical, 100cpm	1.33 [ 1.04- 1.63]	Hours	<0.001	0.91 [ 0.85-0.95]	0.59 [ 0.45-0.70]	TRUE
6	Sedentary time	LFE, Choi, 90min, Vertical, 200cpm	LFE, Triano, 60min, Vertical, 100cpm	1.33 [ 1.16- 1.62]	Hours	<0.001	0.95 [ 0.90-0.97]	0.59 [ 0.46-0.70]	TRUE
6	Sedentary time	LFE, Choi, 90min, Vertical, 200cpm	LFE, Zeros, 30min, Vertical, 100cpm	1.33 [ 1.20- 1.58]	Hours	<0.001	0.96 [ 0.93-0.98]	0.63 [ 0.50-0.72]	TRUE
6	Sedentary time	LFE, Triano, 30min, Vertical, 100cpm	Standard, Triano, 60min, VM, 100cpm	1.34 [ 0.55- 1.81]	Hours	<0.001	0.64 [ 0.42-0.79]	0.41 [ 0.23-0.56]	TRUE
6	Sedentary time	Standard, Triano, 90min, Vertical, 150cpm	Standard, Zeros, 180min, VM, 200cpm	1.34 [ 0.64- 2.03]	Hours	<0.001	0.76 [ 0.60-0.87]	0.49 [ 0.32-0.63]	TRUE
6	Sedentary time	LFE, Triano, 90min, Vertical, 150cpm	Standard, Triano, 180min, VM, 200cpm	1.34 [ 0.77- 1.68]	Hours	<0.001	0.87 [ 0.77-0.93]	0.58 [ 0.43-0.69]	TRUE
6	Sedentary time	LFE, Triano, 180min, Vertical, 100cpm	Standard, Choi, 90min, VM, 150cpm	1.34 [ 0.87- 1.69]	Hours	<0.001	0.88 [ 0.79-0.94]	0.58 [ 0.44-0.70]	TRUE
6	Sedentary time	LFE, Triano, 180min, Vertical, 150cpm	Standard, Zeros, 90min, VM, 200cpm	1.34 [ 0.90- 1.78]	Hours	<0.001	0.88 [ 0.79-0.93]	0.56 [ 0.42-0.68]	TRUE
6	Sedentary time	Standard, Zeros, 180min, Vertical, 200cpm	Standard, Zeros, 30min, Vertical, 150cpm	1.34 [ 0.94- 1.72]	Hours	<0.001	0.88 [ 0.78-0.93]	0.56 [ 0.42-0.68]	TRUE
6	Sedentary time	LFE, Choi, 90min, Vertical, 100cpm	Standard, Triano, 60min, VM, 200cpm	1.34 [ 0.94- 1.94]	Hours	<0.001	0.86 [ 0.75-0.92]	0.49 [ 0.35-0.61]	TRUE
6	Sedentary time	Standard, Choi, 180min, VM, 200cpm	Standard, Triano, 90min, VM, 100cpm	1.34 [ 0.97- 1.78]	Hours	<0.001	0.93 [ 0.87-0.96]	0.62 [ 0.49-0.72]	TRUE
6	Sedentary time	LFE, Zeros, 180min, VM, 200cpm	LFE, Zeros, 90min, VM, 100cpm	1.34 [ 1.04- 1.76]	Hours	<0.001	0.94 [ 0.88-0.97]	0.63 [ 0.50-0.73]	TRUE
6	Sedentary time	LFE, Triano, 180min, Vertical, 200cpm	LFE, Zeros, 30min, Vertical, 100cpm	1.34 [ 1.16- 1.64]	Hours	<0.001	0.95 [ 0.91-0.97]	0.59 [ 0.46-0.70]	TRUE
6	Sedentary time	Standard, Choi, 90min, Vertical, 150cpm	Standard, Triano, 30min, Vertical, 200cpm	1.35 [ 0.51- 2.13]	Hours	<0.001	0.66 [ 0.45-0.80]	0.37 [ 0.21-0.51]	TRUE
6	Sedentary time	Standard, Triano, 30min, Vertical, 200cpm	Standard, Zeros, 90min, VM, 100cpm	1.35 [ 0.51- 2.41]	Hours	<0.001	0.27 [-0.03-0.53]	0.15 [-0.02-0.32]	TRUE
6	Sedentary time	LFE, Triano, 30min, Vertical, 150cpm	LFE, Zeros, 180min, VM, 100cpm	1.35 [ 0.63- 2.19]	Hours	<0.001	0.36 [ 0.06-0.60]	0.22 [ 0.03-0.39]	TRUE
6	Sedentary time	Standard, Zeros, 60min, Vertical, 100cpm	Standard, Zeros, 90min, VM, 200cpm	1.35 [ 0.65- 1.73]	Hours	<0.001	0.84 [ 0.73-0.91]	0.59 [ 0.44-0.71]	TRUE
6	Sedentary time	LFE, Triano, 30min, Vertical, 150cpm	Standard, Zeros, 30min, VM, 150cpm	1.35 [ 0.67- 1.90]	Hours	<0.001	0.78 [ 0.63-0.88]	0.49 [ 0.32-0.62]	TRUE
6	Sedentary time	Standard, Choi, 90min, Vertical, 100cpm	Standard, Zeros, 90min, VM, 200cpm	1.35 [ 0.75- 1.74]	Hours	<0.001	0.88 [ 0.78-0.93]	0.60 [ 0.45-0.71]	TRUE
6	Sedentary time	Standard, Triano, 30min, Vertical, 150cpm	Standard, Triano, 90min, VM, 100cpm	1.35 [ 0.75- 2.18]	Hours	<0.001	0.32 [ 0.01-0.57]	0.18 [ 0.00-0.35]	TRUE
6	Sedentary time	LFE, Zeros, 30min, Vertical, 100cpm	Standard, Choi, 180min, VM, 100cpm	1.35 [ 0.78- 1.97]	Hours	<0.001	0.76 [ 0.59-0.86]	0.50 [ 0.33-0.64]	TRUE
6	Sedentary time	LFE, Choi, 180min, VM, 200cpm	Standard, Triano, 30min, VM, 200cpm	1.35 [ 0.80- 2.15]	Hours	<0.001	0.65 [ 0.43-0.79]	0.31 [ 0.16-0.44]	TRUE
6	Sedentary time	Standard, Zeros, 30min, Vertical, 100cpm	Standard, Zeros, 60min, VM, 150cpm	1.35 [ 0.93- 1.85]	Hours	<0.001	0.75 [ 0.57-0.86]	0.52 [ 0.34-0.66]	TRUE
6	Sedentary time	LFE, Zeros, 60min, Vertical, 100cpm	Standard, Triano, 60min, VM, 200cpm	1.35 [ 0.97- 1.78]	Hours	<0.001	0.85 [ 0.73-0.91]	0.49 [ 0.35-0.62]	TRUE
6	Sedentary time	Standard, Choi, 90min, VM, 150cpm	Standard, Triano, 30min, VM, 200cpm	1.36 [ 0.53- 2.14]	Hours	<0.001	0.64 [ 0.42-0.79]	0.32 [ 0.17-0.45]	TRUE
6	Sedentary time	Standard, Zeros, 30min, Vertical, 150cpm	Standard, Zeros, 90min, VM, 200cpm	1.36 [ 0.74- 1.76]	Hours	<0.001	0.70 [ 0.51-0.83]	0.50 [ 0.32-0.65]	TRUE
6	Sedentary time	LFE, Triano, 60min, Vertical, 100cpm	Standard, Choi, 180min, VM, 100cpm	1.36 [ 0.74- 1.94]	Hours	<0.001	0.78 [ 0.63-0.88]	0.51 [ 0.34-0.65]	TRUE
6	Sedentary time	Standard, Triano, 180min, Vertical, 150cpm	Standard, Triano, 30min, Vertical, 200cpm	1.36 [ 0.78- 2.18]	Hours	<0.001	0.64 [ 0.41-0.79]	0.33 [ 0.18-0.48]	TRUE
6	Sedentary time	LFE, Choi, 180min, Vertical, 100cpm	Standard, Choi, 90min, VM, 150cpm	1.36 [ 0.88- 1.85]	Hours	<0.001	0.89 [ 0.80-0.94]	0.56 [ 0.42-0.68]	TRUE
6	Sedentary time	Standard, Choi, 180min, Vertical, 150cpm	Standard, Triano, 30min, Vertical, 200cpm	1.36 [ 0.90- 2.22]	Hours	<0.001	0.65 [ 0.43-0.80]	0.33 [ 0.18-0.47]	TRUE
6	Sedentary time	LFE, Choi, 90min, Vertical, 200cpm	Standard, Zeros, 180min, VM, 200cpm	1.36 [ 0.92- 2.08]	Hours	<0.001	0.82 [ 0.69-0.90]	0.50 [ 0.34-0.62]	TRUE
6	Sedentary time	Standard, Choi, 180min, Vertical, 100cpm	Standard, Choi, 180min, VM, 200cpm	1.36 [ 0.95- 1.87]	Hours	<0.001	0.88 [ 0.79-0.93]	0.56 [ 0.41-0.67]	TRUE
6	Sedentary time	LFE, Triano, 90min, Vertical, 150cpm	Standard, Zeros, 60min, VM, 200cpm	1.36 [ 1.05- 1.69]	Hours	<0.001	0.90 [ 0.82-0.95]	0.57 [ 0.43-0.69]	TRUE
6	Sedentary time	LFE, Triano, 180min, Vertical, 200cpm	LFE, Triano, 60min, Vertical, 100cpm	1.36 [ 1.20- 1.71]	Hours	<0.001	0.94 [ 0.90-0.97]	0.57 [ 0.44-0.68]	TRUE
6	Sedentary time	LFE, Triano, 30min, Vertical, 200cpm	Standard, Zeros, 60min, VM, 150cpm	1.37 [ 0.44- 1.96]	Hours	<0.001	0.63 [ 0.40-0.78]	0.43 [ 0.24-0.59]	TRUE
6	Sedentary time	LFE, Triano, 60min, Vertical, 150cpm	Standard, Triano, 90min, VM, 200cpm	1.37 [ 0.74- 1.75]	Hours	<0.001	0.84 [ 0.72-0.91]	0.54 [ 0.39-0.66]	TRUE
6	Sedentary time	LFE, Zeros, 60min, Vertical, 150cpm	Standard, Zeros, 90min, VM, 200cpm	1.37 [ 0.74- 1.76]	Hours	<0.001	0.87 [ 0.77-0.93]	0.59 [ 0.44-0.71]	TRUE
6	Sedentary time	LFE, Choi, 180min, Vertical, 100cpm	Standard, Triano, 180min, VM, 150cpm	1.37 [ 0.79- 1.83]	Hours	<0.001	0.86 [ 0.76-0.92]	0.55 [ 0.40-0.67]	TRUE
6	Sedentary time	LFE, Choi, 180min, Vertical, 100cpm	LFE, Choi, 180min, VM, 200cpm	1.37 [ 0.84- 1.70]	Hours	<0.001	0.87 [ 0.77-0.93]	0.56 [ 0.42-0.68]	TRUE
6	Sedentary time	LFE, Triano, 180min, Vertical, 100cpm	LFE, Triano, 180min, VM, 200cpm	1.37 [ 0.84- 1.78]	Hours	<0.001	0.87 [ 0.76-0.93]	0.55 [ 0.40-0.67]	TRUE
6	Sedentary time	LFE, Triano, 60min, Vertical, 100cpm	LFE, Triano, 60min, VM, 200cpm	1.37 [ 0.84- 1.78]	Hours	<0.001	0.86 [ 0.76-0.92]	0.54 [ 0.39-0.66]	TRUE
6	Sedentary time	LFE, Triano, 90min, Vertical, 100cpm	LFE, Triano, 90min, VM, 200cpm	1.37 [ 0.84- 1.78]	Hours	<0.001	0.88 [ 0.78-0.93]	0.57 [ 0.42-0.69]	TRUE
6	Sedentary time	LFE, Zeros, 30min, Vertical, 100cpm	LFE, Zeros, 30min, VM, 200cpm	1.37 [ 0.84- 1.78]	Hours	<0.001	0.87 [ 0.78-0.93]	0.56 [ 0.42-0.68]	TRUE
6	Sedentary time	Standard, Choi, 90min, Vertical, 100cpm	Standard, Triano, 180min, VM, 200cpm	1.37 [ 0.84- 1.84]	Hours	<0.001	0.85 [ 0.73-0.92]	0.54 [ 0.39-0.67]	TRUE
6	Sedentary time	LFE, Triano, 90min, Vertical, 100cpm	Standard, Zeros, 30min, VM, 200cpm	1.37 [ 0.86- 1.80]	Hours	<0.001	0.87 [ 0.76-0.93]	0.54 [ 0.39-0.66]	TRUE
6	Sedentary time	LFE, Choi, 90min, Vertical, 150cpm	Standard, Zeros, 90min, VM, 200cpm	1.37 [ 0.87- 1.69]	Hours	<0.001	0.90 [ 0.82-0.95]	0.60 [ 0.46-0.71]	TRUE
6	Sedentary time	LFE, Triano, 90min, Vertical, 100cpm	LFE, Zeros, 60min, VM, 200cpm	1.37 [ 0.89- 1.69]	Hours	<0.001	0.88 [ 0.78-0.93]	0.59 [ 0.45-0.71]	TRUE
6	Sedentary time	Standard, Zeros, 180min, Vertical, 100cpm	Standard, Zeros, 180min, VM, 200cpm	1.37 [ 0.95- 1.78]	Hours	<0.001	0.88 [ 0.79-0.94]	0.56 [ 0.41-0.67]	TRUE
6	Sedentary time	LFE, Choi, 180min, Vertical, 100cpm	Standard, Zeros, 60min, VM, 150cpm	1.37 [ 1.12- 1.95]	Hours	<0.001	0.89 [ 0.81-0.94]	0.54 [ 0.40-0.66]	TRUE
6	Sedentary time	Standard, Choi, 90min, Vertical, 100cpm	Standard, Zeros, 180min, VM, 150cpm	1.38 [ 0.73- 2.02]	Hours	<0.001	0.79 [ 0.64-0.88]	0.51 [ 0.34-0.64]	TRUE
6	Sedentary time	LFE, Zeros, 180min, Vertical, 100cpm	LFE, Zeros, 180min, VM, 200cpm	1.38 [ 0.84- 1.70]	Hours	<0.001	0.87 [ 0.77-0.93]	0.55 [ 0.40-0.67]	TRUE
6	Sedentary time	LFE, Zeros, 60min, Vertical, 100cpm	LFE, Zeros, 60min, VM, 200cpm	1.38 [ 0.84- 1.74]	Hours	<0.001	0.88 [ 0.78-0.93]	0.57 [ 0.42-0.68]	TRUE
6	Sedentary time	LFE, Zeros, 90min, Vertical, 100cpm	LFE, Zeros, 90min, VM, 200cpm	1.38 [ 0.84- 1.74]	Hours	<0.001	0.88 [ 0.78-0.93]	0.57 [ 0.42-0.68]	TRUE
6	Sedentary time	LFE, Choi, 90min, Vertical, 100cpm	LFE, Choi, 90min, VM, 200cpm	1.38 [ 0.84- 1.78]	Hours	<0.001	0.88 [ 0.79-0.93]	0.58 [ 0.43-0.70]	TRUE
6	Sedentary time	LFE, Choi, 180min, Vertical, 150cpm	Standard, Choi, 180min, VM, 200cpm	1.38 [ 1.04- 1.87]	Hours	<0.001	0.90 [ 0.82-0.94]	0.55 [ 0.41-0.67]	TRUE
6	Sedentary time	LFE, Zeros, 180min, Vertical, 200cpm	LFE, Zeros, 60min, Vertical, 100cpm	1.38 [ 1.14- 1.78]	Hours	<0.001	0.94 [ 0.89-0.97]	0.56 [ 0.43-0.67]	TRUE
6	Sedentary time	LFE, Triano, 30min, Vertical, 150cpm	Standard, Zeros, 60min, VM, 100cpm	1.39 [ 0.37- 2.02]	Hours	<0.001	0.59 [ 0.34-0.76]	0.38 [ 0.19-0.54]	TRUE
6	Sedentary time	LFE, Triano, 30min, Vertical, 150cpm	LFE, Zeros, 60min, VM, 150cpm	1.39 [ 0.51- 1.96]	Hours	<0.001	0.54 [ 0.29-0.73]	0.35 [ 0.16-0.52]	TRUE
6	Sedentary time	LFE, Zeros, 90min, Vertical, 100cpm	Standard, Triano, 30min, Vertical, 100cpm	1.39 [ 0.73- 2.13]	Hours	<0.001	0.58 [ 0.34-0.75]	0.29 [ 0.14-0.43]	TRUE
6	Sedentary time	LFE, Choi, 90min, Vertical, 150cpm	LFE, Zeros, 180min, VM, 200cpm	1.39 [ 0.82- 2.13]	Hours	<0.001	0.77 [ 0.61-0.87]	0.46 [ 0.30-0.60]	TRUE
6	Sedentary time	LFE, Triano, 30min, Vertical, 100cpm	LFE, Triano, 30min, VM, 200cpm	1.39 [ 0.91- 1.82]	Hours	<0.001	0.82 [ 0.68-0.90]	0.44 [ 0.29-0.57]	TRUE
6	Sedentary time	LFE, Zeros, 90min, Vertical, 100cpm	Standard, Triano, 180min, VM, 150cpm	1.39 [ 0.99- 1.77]	Hours	<0.001	0.87 [ 0.76-0.93]	0.54 [ 0.39-0.66]	TRUE
6	Sedentary time	Standard, Triano, 90min, VM, 200cpm	Standard, Zeros, 30min, VM, 100cpm	1.39 [ 1.04- 1.65]	Hours	<0.001	0.93 [ 0.87-0.96]	0.58 [ 0.44-0.68]	TRUE
6	Sedentary time	LFE, Zeros, 90min, Vertical, 100cpm	Standard, Choi, 90min, VM, 150cpm	1.39 [ 1.06- 1.94]	Hours	<0.001	0.90 [ 0.82-0.94]	0.56 [ 0.42-0.68]	TRUE
6	Sedentary time	Standard, Choi, 90min, VM, 200cpm	Standard, Triano, 60min, VM, 100cpm	1.39 [ 1.20- 1.92]	Hours	<0.001	0.93 [ 0.86-0.96]	0.53 [ 0.39-0.64]	TRUE
6	Sedentary time	LFE, Zeros, 30min, Vertical, 100cpm	LFE, Zeros, 90min, VM, 150cpm	1.40 [ 0.69- 1.94]	Hours	<0.001	0.74 [ 0.56-0.85]	0.50 [ 0.32-0.64]	TRUE
6	Sedentary time	LFE, Zeros, 180min, VM, 150cpm	Standard, Triano, 30min, VM, 200cpm	1.40 [ 0.72- 2.02]	Hours	<0.001	0.61 [ 0.37-0.77]	0.33 [ 0.17-0.47]	TRUE
6	Sedentary time	LFE, Triano, 90min, Vertical, 150cpm	Standard, Choi, 90min, VM, 200cpm	1.40 [ 0.91- 1.68]	Hours	<0.001	0.90 [ 0.81-0.94]	0.59 [ 0.45-0.71]	TRUE
6	Sedentary time	LFE, Choi, 90min, Vertical, 100cpm	LFE, Zeros, 60min, VM, 200cpm	1.40 [ 0.98- 1.77]	Hours	<0.001	0.89 [ 0.81-0.94]	0.57 [ 0.42-0.68]	TRUE
6	Sedentary time	Standard, Zeros, 180min, VM, 200cpm	Standard, Zeros, 60min, VM, 100cpm	1.40 [ 0.99- 1.73]	Hours	<0.001	0.94 [ 0.89-0.97]	0.61 [ 0.48-0.71]	TRUE
6	Sedentary time	LFE, Choi, 90min, Vertical, 150cpm	Standard, Choi, 90min, VM, 200cpm	1.40 [ 1.04- 1.87]	Hours	<0.001	0.91 [ 0.84-0.95]	0.57 [ 0.43-0.68]	TRUE
6	Sedentary time	LFE, Zeros, 180min, Vertical, 150cpm	Standard, Zeros, 180min, VM, 200cpm	1.40 [ 1.04- 1.89]	Hours	<0.001	0.89 [ 0.80-0.94]	0.53 [ 0.39-0.65]	TRUE
6	Sedentary time	LFE, Zeros, 90min, Vertical, 150cpm	Standard, Zeros, 90min, VM, 200cpm	1.40 [ 1.04- 1.89]	Hours	<0.001	0.90 [ 0.82-0.95]	0.55 [ 0.41-0.66]	TRUE
6	Sedentary time	LFE, Triano, 90min, VM, 200cpm	LFE, Zeros, 30min, VM, 100cpm	1.40 [ 1.05- 1.61]	Hours	<0.001	0.95 [ 0.92-0.98]	0.65 [ 0.52-0.74]	TRUE
6	Sedentary time	LFE, Choi, 90min, Vertical, 200cpm	LFE, Triano, 30min, Vertical, 150cpm	1.40 [ 1.14- 2.05]	Hours	<0.001	0.82 [ 0.68-0.90]	0.42 [ 0.28-0.54]	TRUE
6	Sedentary time	LFE, Choi, 90min, VM, 200cpm	LFE, Triano, 60min, VM, 100cpm	1.40 [ 1.19- 1.74]	Hours	<0.001	0.94 [ 0.89-0.97]	0.59 [ 0.46-0.70]	TRUE
6	Sedentary time	LFE, Triano, 180min, VM, 200cpm	LFE, Triano, 60min, VM, 100cpm	1.40 [ 1.21- 1.84]	Hours	<0.001	0.95 [ 0.90-0.97]	0.57 [ 0.44-0.68]	TRUE
6	Sedentary time	LFE, Triano, 60min, VM, 150cpm	Standard, Triano, 30min, VM, 100cpm	1.41 [ 0.63- 2.01]	Hours	<0.001	0.73 [ 0.55-0.85]	0.38 [ 0.23-0.51]	TRUE
6	Sedentary time	LFE, Triano, 60min, Vertical, 100cpm	Standard, Zeros, 90min, VM, 100cpm	1.41 [ 0.68- 1.96]	Hours	<0.001	0.78 [ 0.63-0.88]	0.51 [ 0.35-0.65]	TRUE
6	Sedentary time	LFE, Triano, 30min, Vertical, 200cpm	Standard, Zeros, 30min, VM, 200cpm	1.41 [ 0.81- 1.90]	Hours	<0.001	0.80 [ 0.65-0.89]	0.49 [ 0.33-0.62]	TRUE
6	Sedentary time	LFE, Zeros, 60min, Vertical, 150cpm	Standard, Triano, 180min, VM, 200cpm	1.41 [ 0.90- 1.87]	Hours	<0.001	0.83 [ 0.71-0.91]	0.53 [ 0.38-0.66]	TRUE
6	Sedentary time	LFE, Zeros, 60min, Vertical, 150cpm	Standard, Choi, 90min, VM, 200cpm	1.41 [ 0.92- 1.92]	Hours	<0.001	0.87 [ 0.78-0.93]	0.56 [ 0.41-0.68]	TRUE
[truncated: 5,397 more rows]
